# Supplementary material for: CRISPR screens identify genomic ribonucleotides as a source of PARP-trapping lesions
Source: Springer Nature journal article supplement (doi:10.1038/s41586-018-0291-z), 2018-07-01
Supplement: MOESM3 [file 41586_2018_291_MOESM3_ESM.xlsx]

## Sheet: High-confidence hits
High confidence hits (FDR<=1% + >=2 cell lines at FDR<=10%)
SUM	RPE	HELA
ANAPC2	ACSL4	ANAPC2
APITD1	ARGLU1	ATF7
ARGLU1	ATM	ATM
ATM	AUNIP	ATR
ATR	BARD1	AUNIP
ATRIP	BRCA1	BARD1
AUNIP	BRD8	BRCA1
BARD1	C11orf30	BRCA2
BOD1L1	C19orf40	BRD8
BRCA1	CCT4	CENPW
BRCA2	CD2BP2	CHD1L
C11orf30	CDC73	CHRAC1
C16orf86	CDK5	COMMD1
C17orf53	CHD1L	CTDP1
C19orf40	CPN2	DDX18
C19orf43	CREM	EME1
C1orf86	DDX46	EPN1
C4orf21	DLX3	ESCO2
CCDC177	EME1	FANCA
CDK2AP2	EPN1	FANCC
CDK5	ESCO2	FANCE
CDKN3	FANCA	GTF2B
CENPW	FANCD2	GTPBP4
CHD1L	FANCM	HELLS
CHRAC1	FNDC3B	HJURP
CLUH	GGNBP2	HMCN1
CNOT11	GHR	HUS1
CNOT2	HELLS	KIF18A
CNOT3	IMP3	LIG1
CNOT4	INTS7	MFSD3
COL20A1	KDM8	MND1
COMMD1	KIF20A	MUS81
COPS5	LIG1	NBN
CREM	LRWD1	PGD
CSTF1	MUS81	PNKP
CTDP1	NOP14	PPP1R8
DDX46	NUP62	PSMC3IP
DIP2B	PALB2	RAD51B
DNA2	PHF12	RAD51C
DNPH1	PPP1R8	RAD51D
DTL	PPP2R4	RBBP8
EME1	RNASEH2A	RNASEH2A
ETAA1	RNASEH2B	RNASEH2B
FANCA	RNASEH2C	RNASEH2C
FANCB	RNF168	RNF168
FANCC	RUVBL1	RNF8
FANCD2	SACM1L	RTP3
FANCE	SARS	SEPT8
FANCF	SF3B3	SLX4
FANCG	SF3B5	SNRNP200
FANCI	SMC6	SNRPA
FANCM	SNRNP200	SPACA4
FH	SPACA4	SRSF11
GTF2B	SWI5	SWI5
HELQ	TIPRL	THOC5
HJURP	TRAPPC4	TIPRL
HUS1	URB1	TONSL
KDM8	WDR48	TRAIP
KIAA0146	WDR76	TSC1
LIG1	XKR7	UBE2T
LRWD1	ZNF574	URB1
MCM8		XRCC2
MRE11A		XRCC3
MUS81		ZNF512B
NUP62
PALB2
PARP2
PGD
PHF12
PNKP
POLR2B
POLR3A
PPP1R8
PPP2R4
PSMA7
PSMC3IP
PSMD4
PSMD7
RAD18
RAD51
RAD51B
RAD51C
RAD51D
RBBP8
RBM33
RNASEH2A
RNASEH2B
RNASEH2C
RPA1
RPRD1B
RTF1
SACM1L
SARS
SCAF4
SF3B3
SF3B5
SMC6
SRSF11
THOC1
TONSL
TRAIP
TRAPPC4
TSC1
UBE2T
UROD
USP1
USP9X
WDR48
WRAP53
WRN
XKR7
XRCC2
XRCC3
ZBED3
ZNF512B
ZNF574

## Sheet: Venn list
Cell lines	Number of hits	Genes
HELA RPE SUM	13	RNASEH2A
		PPP1R8
		AUNIP
		FANCA
		EME1
		RNASEH2B
		MUS81
		BRCA1
		RNASEH2C
		LIG1
		CHD1L
		BARD1
		ATM
RPE SUM	23	ZNF574
		PHF12
		PPP2R4
		C19orf40
		SACM1L
		SF3B5
		DDX46
		CDK5
		SARS
		TRAPPC4
		NUP62
		XKR7
		WDR48
		SF3B3
		LRWD1
		ARGLU1
		PALB2
		CREM
		SMC6
		C11orf30
		KDM8
		FANCD2
		FANCM
HELA SUM	27	HUS1
		FANCE
		CENPW
		TONSL
		SRSF11
		PNKP
		RBBP8
		ZNF512B
		RAD51B
		RAD51D
		ATR
		BRCA2
		PSMC3IP
		XRCC3
		PGD
		COMMD1
		GTF2B
		FANCC
		TSC1
		ANAPC2
		CTDP1
		RAD51C
		UBE2T
		CHRAC1
		HJURP
		TRAIP
		XRCC2
HELA RPE	10	SNRNP200
		ESCO2
		TIPRL
		RNF168
		SPACA4
		HELLS
		EPN1
		URB1
		BRD8
		SWI5
SUM	53	POLR2B
		CNOT3
		PARP2
		FH
		DNA2
		C4orf21
		KIAA0146
		BOD1L1
		CCDC177
		DTL
		RPA1
		CSTF1
		CLUH
		ZBED3
		POLR3A
		CDK2AP2
		UROD
		DNPH1
		RAD51
		COL20A1
		CNOT11
		RAD18
		APITD1
		ATRIP
		FANCI
		PSMA7
		FANCF
		MCM8
		CDKN3
		COPS5
		SCAF4
		C1orf86
		C16orf86
		THOC1
		CNOT2
		MRE11A
		USP1
		PSMD7
		FANCB
		DIP2B
		RPRD1B
		PSMD4
		WRN
		RBM33
		CNOT4
		RTF1
		C19orf43
		ETAA1
		C17orf53
		WRAP53
		FANCG
		USP9X
		HELQ
RPE	15	CCT4
		GGNBP2
		INTS7
		DLX3
		CD2BP2
		CPN2
		NOP14
		RUVBL1
		ACSL4
		IMP3
		KIF20A
		CDC73
		FNDC3B
		GHR
		WDR76
HELA	14	NBN
		SEPT8
		RTP3
		DDX18
		HMCN1
		THOC5
		SNRPA
		ATF7
		KIF18A
		SLX4
		MND1
		GTPBP4
		RNF8
		MFSD3

## Sheet: Gene summary
Gene	HeLa sumZ	HeLa numObs	HeLa normZ	HeLa pval	HeLa rank	HeLa fdr	SUM sumZ	SUM numObs	SUM normZ	SUM pval	SUM rank	SUM fdr	RPE sumZ	RPE numObs	RPE normZ	RPE pval	RPE rank	RPE fdr
A1BG	-5.629	16	-1.407	0.08	2106	0.617	2.324	17	0.564	0.714	11541	1.012	0.765	12	0.221	0.587	9028	1.006
A1CF	3.685	17	0.894	0.814	12170	1.091	3.848	18	0.907	0.818	12870	1.04	6.656	12	1.921	0.973	14211	1.059
A2M	4.856	17	1.178	0.881	13262	1.083	7.669	18	1.808	0.965	15224	1.037	-2.09	12	-0.603	0.273	5387	0.784
A2ML1	5.207	18	1.227	0.89	13408	1.083	16.72	18	3.941	1	16338	1.002	2.973	12	0.858	0.805	11619	1.071
A4GALT	-2.002	9	-0.667	0.252	4625	0.89	-1.896	9	-0.632	0.264	5641	0.765	4.244	6	1.733	0.958	13902	1.066
A4GNT	-9.969	9	-3.323	0	141	0.051	-6.144	9	-2.048	0.02	1255	0.264	2.236	6	0.913	0.819	11830	1.071
AAAS	0.019	16	0.005	0.502	7823	1.046	-3.84	18	-0.905	0.183	4424	0.676	-12.25	12	-3.536	0	133	0.024
AACS	-1.636	18	-0.386	0.35	5891	0.969	10.323	18	2.433	0.993	15927	1.02	-3.046	12	-0.879	0.19	4258	0.689
AADAC	1.388	9	0.463	0.678	10165	1.088	-1.575	9	-0.525	0.3	6117	0.802	1.168	6	0.477	0.683	10136	1.043
AADACL2	6.713	9	2.238	0.987	15509	1.038	7.938	9	2.646	0.996	16068	1.015	-0.358	6	-0.146	0.442	7368	0.928
AADACL3	1.53	18	0.361	0.641	9634	1.085	1.116	18	0.263	0.604	10118	0.977	-2.539	12	-0.733	0.232	4856	0.738
AADACL4	5.157	18	1.216	0.888	13376	1.083	-2.113	18	-0.498	0.309	6242	0.811	-3.517	12	-1.015	0.155	3784	0.633
AADAT	-3.166	12	-0.914	0.18	3662	0.803	-4.39	12	-1.267	0.103	3085	0.544	-2.71	8	-0.958	0.169	3987	0.655
AAED1	0.337	9	0.112	0.545	8373	1.061	-6.959	9	-2.32	0.01	864	0.193	2.257	6	0.922	0.822	11865	1.071
AAGAB	10.149	17	2.461	0.993	15739	1.029	6.522	18	1.537	0.938	14702	1.044	1.634	12	0.472	0.681	10122	1.041
AAK1	-0.419	18	-0.099	0.461	7275	1.033	-5.142	18	-1.212	0.113	3269	0.565	-8.198	12	-2.367	0.009	693	0.2
AAMDC	4.533	17	1.099	0.864	12959	1.088	3.051	18	0.719	0.764	12181	1.027	4.69	12	1.354	0.912	13119	1.075
AAMP	-1.794	17	-0.435	0.332	5642	0.959	-3.827	18	-0.902	0.184	4438	0.677	-7.829	9	-2.61	0.005	509	0.138
AANAT	13.627	18	3.212	0.999	16134	1.01	1.79	18	0.422	0.663	10895	0.997	-2.18	12	-0.629	0.265	5275	0.776
AAR2	-1.255	16	-0.314	0.377	6255	0.983	-7.522	17	-1.824	0.034	1648	0.338	0.281	10	0.089	0.535	8436	0.982
AARD	-5.99	14	-1.601	0.055	1686	0.529	-7.721	15	-1.993	0.023	1332	0.284	-2.167	10	-0.685	0.247	5063	0.753
AARS	-3.783	13	-1.049	0.147	3156	0.76	-8.538	14	-2.282	0.011	920	0.2	-9.828	9	-3.276	0.001	196	0.042
AARS2	-0.637	17	-0.154	0.439	7000	1.022	-2.89	16	-0.723	0.235	5221	0.737	-1.106	12	-0.319	0.375	6652	0.871
AARSD1	0.95	18	0.224	0.589	8968	1.07	3.202	18	0.755	0.775	12332	1.028	-6.801	12	-1.963	0.025	1234	0.311
AASDH	1.036	18	0.244	0.596	9074	1.072	10.81	18	2.548	0.995	16002	1.017	0.739	12	0.213	0.585	8982	1.007
AASDHPPT	3.287	12	0.949	0.829	12389	1.091	-0.419	12	-0.121	0.452	8218	0.9	-1.752	6	-0.715	0.237	4939	0.743
AASS	0.953	18	0.225	0.589	8970	1.071	4.945	18	1.165	0.878	13732	1.047	10.871	12	3.138	0.999	15215	1.016
AATF	4.76	12	1.374	0.915	13842	1.078	1.117	12	0.322	0.626	10419	0.984	-5.078	9	-1.693	0.045	1769	0.396
AATK	-8.427	17	-2.044	0.02	916	0.365	2.536	17	0.615	0.731	11764	1.017	-3.598	11	-1.085	0.139	3507	0.613
ABAT	-1.768	18	-0.417	0.338	5746	0.961	12.874	18	3.034	0.999	16221	1.008	-4.199	12	-1.212	0.113	3068	0.568
ABCA1	2.535	18	0.598	0.725	10830	1.092	-2.276	18	-0.537	0.296	6066	0.798	3.234	11	0.975	0.835	12055	1.072
ABCA10	9.274	15	2.395	0.992	15687	1.031	-4.893	15	-1.263	0.103	3105	0.544	1.872	10	0.592	0.723	10577	1.057
ABCA12	4.887	18	1.152	0.875	13153	1.085	-1.049	18	-0.247	0.402	7525	0.875	-4.487	10	-1.419	0.078	2441	0.494
ABCA13	-2.385	18	-0.562	0.287	5084	0.921	-0.989	17	-0.24	0.405	7571	0.876	-4.948	12	-1.428	0.077	2413	0.491
ABCA2	4.372	17	1.06	0.856	12813	1.089	3.994	18	0.941	0.827	12996	1.041	-1.104	12	-0.319	0.375	6655	0.872
ABCA3	-15.438	18	-3.639	0	99	0.023	1.766	18	0.416	0.661	10863	0.997	1.848	12	0.533	0.703	10363	1.049
ABCA4	4.628	17	1.122	0.869	13057	1.086	-4.603	18	-1.085	0.139	3756	0.606	1.711	12	0.494	0.689	10210	1.044
ABCA5	0.179	18	0.042	0.517	8016	1.052	2.671	18	0.63	0.736	11843	1.017	-2.556	12	-0.738	0.23	4840	0.736
ABCA6	-1.528	18	-0.36	0.359	6010	0.975	0.494	18	0.117	0.546	9407	0.951	2.516	12	0.726	0.766	11141	1.064
ABCA7	1.159	18	0.273	0.608	9195	1.078	9.312	18	2.195	0.986	15705	1.028	1.839	12	0.531	0.702	10351	1.049
ABCA8	-3.807	18	-0.897	0.185	3727	0.808	-8.962	18	-2.112	0.017	1154	0.246	0.281	12	0.081	0.532	8401	0.98
ABCA9	3.801	18	0.896	0.815	12183	1.091	-3.645	18	-0.859	0.195	4599	0.695	-11.334	12	-3.272	0.001	198	0.042
ABCB1	-3.766	18	-0.888	0.187	3769	0.811	3.63	18	0.856	0.804	12685	1.037	-0.004	12	-0.001	0.5	8011	0.964
ABCB10	0.318	14	0.085	0.534	8233	1.058	-3.761	15	-0.971	0.166	4179	0.649	7.057	10	2.232	0.987	14598	1.046
ABCB11	0.499	18	0.118	0.547	8403	1.061	4.841	18	1.141	0.873	13666	1.046	-0.086	12	-0.025	0.49	7910	0.958
ABCB4	9.899	18	2.333	0.99	15631	1.033	-12.125	18	-2.858	0.002	427	0.082	0.972	12	0.281	0.61	9300	1.015
ABCB5	2.759	18	0.65	0.742	11073	1.093	2.133	18	0.503	0.692	11265	1.006	5.96	12	1.721	0.957	13885	1.066
ABCB6	5.791	18	1.365	0.914	13815	1.079	-4.286	18	-1.01	0.156	4021	0.636	-2.371	12	-0.684	0.247	5065	0.754
ABCB7	12.367	16	3.092	0.999	16098	1.012	-3.977	15	-1.027	0.152	3962	0.629	-0.48	11	-0.145	0.442	7379	0.927
ABCB8	-5.885	18	-1.387	0.083	2156	0.626	3.14	18	0.74	0.77	12263	1.028	7.318	12	2.113	0.983	14463	1.051
ABCB9	8.802	18	2.075	0.981	15297	1.046	5.088	18	1.199	0.885	13834	1.047	-4.074	11	-1.228	0.11	3016	0.562
ABCC1	0.164	18	0.039	0.515	7996	1.051	-2.36	18	-0.556	0.289	5971	0.792	0.822	12	0.237	0.594	9112	1.008
ABCC10	1.975	18	0.466	0.679	10184	1.088	-2.98	18	-0.702	0.241	5308	0.744	6.818	12	1.968	0.975	14277	1.057
ABCC11	6.617	18	1.56	0.941	14342	1.07	-5.971	18	-1.407	0.08	2634	0.495	-1.488	12	-0.429	0.334	6155	0.839
ABCC12	7.811	18	1.841	0.967	14940	1.056	-8.303	18	-1.957	0.025	1395	0.295	-3.807	12	-1.099	0.136	3454	0.609
ABCC2	-0.008	18	-0.002	0.499	7789	1.045	-0.033	18	-0.008	0.497	8787	0.926	-4.871	12	-1.406	0.08	2490	0.496
ABCC3	1.117	18	0.263	0.604	9157	1.075	-1.784	18	-0.421	0.337	6639	0.831	11.328	12	3.27	0.999	15256	1.013
ABCC4	-2.964	17	-0.719	0.236	4408	0.874	-2.172	18	-0.512	0.304	6169	0.808	9.587	12	2.768	0.997	15050	1.025
ABCC5	6.973	18	1.644	0.95	14526	1.067	-11.636	18	-2.743	0.003	495	0.101	-0.279	12	-0.08	0.468	7672	0.943
ABCC6	-0.573	18	-0.135	0.446	7081	1.028	-7.917	18	-1.866	0.031	1557	0.326	2.334	12	0.674	0.75	10930	1.061
ABCC8	-0.771	18	-0.182	0.428	6874	1.015	3.592	18	0.847	0.801	12656	1.037	-4.681	12	-1.351	0.088	2656	0.514
ABCC9	-0.421	18	-0.099	0.46	7272	1.033	-2.519	18	-0.594	0.276	5811	0.778	-8.308	12	-2.398	0.008	661	0.193
ABCD1	-3.19	18	-0.752	0.226	4281	0.861	0.819	18	0.193	0.577	9793	0.964	1.145	12	0.331	0.63	9516	1.023
ABCD2	-0.888	16	-0.222	0.412	6696	1.004	2.962	18	0.698	0.757	12111	1.024	-0.546	12	-0.158	0.437	7323	0.924
ABCD3	2.493	18	0.588	0.722	10788	1.091	1.048	18	0.247	0.598	10048	0.974	-4.462	12	-1.288	0.099	2829	0.54
ABCD4	-2.038	18	-0.48	0.315	5437	0.946	7.23	18	1.704	0.956	15050	1.04	8.618	12	2.488	0.994	14868	1.034
ABCF1	1.206	14	0.322	0.626	9453	1.081	-1.844	14	-0.493	0.311	6270	0.812	-3.857	10	-1.22	0.111	3045	0.565
ABCF2	-5.12	18	-1.207	0.114	2651	0.7	-2.146	18	-0.506	0.307	6207	0.808	6.486	12	1.872	0.969	14142	1.06
ABCF3	4.085	18	0.963	0.832	12458	1.089	1.376	18	0.324	0.627	10429	0.984	-9.353	12	-2.7	0.003	451	0.119
ABCG1	4.901	18	1.155	0.876	13168	1.085	-8.819	18	-2.079	0.019	1196	0.258	-5.359	12	-1.547	0.061	2080	0.453
ABCG2	7.86	18	1.853	0.968	14968	1.055	1.25	18	0.295	0.616	10280	0.981	-6.034	12	-1.742	0.041	1662	0.379
ABCG4	7.241	18	1.707	0.956	14680	1.062	-7.084	17	-1.718	0.043	1858	0.378	-0.398	11	-0.12	0.452	7491	0.934
ABCG5	-0.179	18	-0.042	0.483	7574	1.041	-1.776	18	-0.419	0.338	6651	0.831	-3.471	10	-1.097	0.136	3461	0.609
ABCG8	-5.437	18	-1.281	0.1	2432	0.671	5.914	18	1.394	0.918	14383	1.045	0.667	12	0.192	0.576	8886	1.003
ABHD1	0.719	17	0.174	0.569	8701	1.067	-5.23	17	-1.268	0.102	3080	0.544	0.899	12	0.259	0.602	9209	1.012
ABHD10	-0.623	14	-0.166	0.434	6944	1.019	0.521	15	0.135	0.553	9499	0.954	1.544	10	0.488	0.687	10181	1.044
ABHD11	0.042	18	0.01	0.504	7857	1.046	11.285	18	2.66	0.996	16077	1.014	-1.308	12	-0.378	0.353	6393	0.854
ABHD12	4.908	18	1.157	0.876	13180	1.084	-2.823	18	-0.665	0.253	5482	0.755	5.254	12	1.517	0.935	13493	1.072
ABHD12B	7.415	15	1.915	0.972	15071	1.052	-2.41	15	-0.622	0.267	5686	0.768	1.079	10	0.341	0.634	9569	1.024
ABHD13	-1.841	9	-0.614	0.27	4867	0.904	-2.03	9	-0.677	0.249	5407	0.755	0.694	6	0.284	0.612	9305	1.017
ABHD14A	0.629	18	0.148	0.559	8559	1.065	2.775	18	0.654	0.743	11933	1.02	1.797	12	0.519	0.698	10308	1.047
ABHD14B	-6.881	15	-1.777	0.038	1325	0.465	-7.339	18	-1.73	0.042	1836	0.373	-1.118	11	-0.337	0.368	6576	0.866
ABHD15	-5.941	18	-1.4	0.081	2123	0.62	-12.227	18	-2.882	0.002	413	0.078	3.051	12	0.881	0.811	11707	1.071
ABHD16A	2.716	18	0.64	0.739	11023	1.093	-0.261	18	-0.062	0.475	8539	0.912	6.142	12	1.773	0.962	13984	1.064
ABHD16B	3.37	18	0.794	0.786	11709	1.096	4.508	18	1.063	0.856	13421	1.044	-1.517	12	-0.438	0.331	6125	0.835
ABHD17B	-0.827	18	-0.195	0.423	6798	1.014	-1.634	18	-0.385	0.35	6823	0.84	2.818	12	0.814	0.792	11461	1.069
ABHD17C	-0.966	18	-0.228	0.41	6670	1.002	1.621	18	0.382	0.649	10695	0.993	17.508	12	5.054	1	15449	1.001
ABHD2	0.776	18	0.183	0.573	8754	1.067	5.946	18	1.402	0.919	14403	1.045	8.694	12	2.51	0.994	14879	1.033
ABHD3	-0.728	18	-0.172	0.432	6917	1.018	-3.219	18	-0.759	0.224	5052	0.726	-1.997	12	-0.577	0.282	5506	0.792
ABHD4	-6.107	18	-1.439	0.075	2030	0.603	-0.828	18	-0.195	0.423	7836	0.883	4.296	12	1.24	0.893	12840	1.075
ABHD5	-2.596	18	-0.612	0.27	4877	0.904	-5.344	18	-1.259	0.104	3119	0.545	-4.38	12	-1.264	0.103	2914	0.547
ABHD6	8.32	18	1.961	0.975	15138	1.051	2.307	18	0.544	0.707	11445	1.011	-2.593	12	-0.749	0.227	4795	0.732
ABHD8	-11.004	17	-2.669	0.004	357	0.174	6.401	18	1.509	0.934	14654	1.044	-8.276	12	-2.389	0.008	671	0.195
ABI1	5.586	18	1.317	0.906	13653	1.082	1.427	18	0.336	0.632	10487	0.986	-1.259	12	-0.364	0.358	6463	0.857
ABI2	-1.612	18	-0.38	0.352	5919	0.97	3.128	18	0.737	0.77	12252	1.028	-1.252	12	-0.361	0.359	6476	0.857
ABI3	-7.109	18	-1.676	0.047	1519	0.504	4.776	18	1.126	0.87	13613	1.046	0.286	12	0.083	0.533	8405	0.981
ABI3BP	-8.323	18	-1.962	0.025	1039	0.391	-3.998	18	-0.942	0.173	4267	0.664	-1.424	12	-0.411	0.34	6251	0.842
ABL1	5.784	18	1.363	0.914	13811	1.079	-7.642	18	-1.801	0.036	1697	0.346	2.906	12	0.839	0.799	11552	1.07
ABL2	-1.328	18	-0.313	0.377	6257	0.983	-6.46	18	-1.523	0.064	2312	0.453	-7.849	12	-2.266	0.012	785	0.231
ABLIM1	7.279	18	1.716	0.957	14700	1.062	3.798	17	0.921	0.822	12923	1.041	-2.924	12	-0.844	0.199	4410	0.699
ABLIM2	6.236	18	1.47	0.929	14099	1.075	2.183	18	0.514	0.697	11321	1.007	-0.962	12	-0.278	0.391	6829	0.885
ABLIM3	-0.943	18	-0.222	0.412	6692	1.004	1.924	18	0.454	0.675	11022	1.002	7.726	12	2.23	0.987	14595	1.046
ABP1	-1.969	18	-0.464	0.321	5497	0.953	-6.944	18	-1.637	0.051	2031	0.41	1.012	12	0.292	0.615	9359	1.016
ABR	4.264	18	1.005	0.843	12619	1.089	7.31	18	1.723	0.958	15073	1.04	2.265	12	0.654	0.743	10845	1.06
ABRA	3.99	18	0.941	0.827	12353	1.091	1.462	18	0.344	0.635	10524	0.987	10.859	12	3.135	0.999	15212	1.016
ABRACL	4.337	9	1.446	0.926	14030	1.076	0.942	9	0.314	0.623	10375	0.983	1.76	6	0.718	0.764	11102	1.064
ABT1	10.741	15	2.773	0.997	15961	1.019	-3.454	18	-0.814	0.208	4792	0.71	-5.999	12	-1.732	0.042	1679	0.384
ABTB1	10.852	18	2.558	0.995	15830	1.025	4.069	18	0.959	0.831	13062	1.042	7.033	12	2.03	0.979	14357	1.055
ABTB2	1.527	18	0.36	0.641	9632	1.085	-7.852	18	-1.851	0.032	1587	0.331	-0.757	12	-0.219	0.413	7082	0.903
ACAA1	6.105	17	1.481	0.931	14128	1.074	-15.284	17	-3.707	0	150	0.011	1.737	11	0.524	0.7	10325	1.048
ACAA2	-0.073	12	-0.021	0.492	7680	1.044	1.427	12	0.412	0.66	10843	0.996	6.963	8	2.462	0.993	14848	1.034
ACACA	-5.618	18	-1.324	0.093	2321	0.652	9.238	18	2.177	0.985	15683	1.028	1.893	10	0.599	0.725	10600	1.058
ACACB	1.347	18	0.318	0.625	9426	1.081	-7.53	18	-1.775	0.038	1751	0.355	4.393	12	1.268	0.898	12905	1.076
ACAD10	-4.234	17	-1.027	0.152	3241	0.766	6.085	18	1.434	0.924	14480	1.045	0.587	12	0.17	0.567	8790	0.998
ACAD11	3.72	18	0.877	0.81	12088	1.093	5.91	18	1.393	0.918	14381	1.045	-3.869	12	-1.117	0.132	3377	0.605
ACAD8	-4.371	18	-1.03	0.151	3231	0.765	-5.024	18	-1.184	0.118	3378	0.573	2.949	12	0.851	0.803	11595	1.071
ACAD9	-0.271	14	-0.072	0.471	7414	1.036	-0.619	18	-0.146	0.442	8073	0.896	0.499	11	0.15	0.56	8709	0.994
ACADL	5.097	18	1.201	0.885	13337	1.083	-2.724	18	-0.642	0.26	5587	0.763	-4.795	12	-1.384	0.083	2553	0.504
ACADM	5.808	18	1.369	0.915	13826	1.079	-5.608	18	-1.322	0.093	2903	0.525	1.094	12	0.316	0.624	9449	1.021
ACADS	-6.559	16	-1.64	0.051	1593	0.517	-3.407	16	-0.852	0.197	4637	0.696	1.901	10	0.601	0.726	10605	1.059
ACADSB	8.5	18	2.003	0.977	15199	1.049	-4.54	18	-1.07	0.142	3807	0.612	-0.596	12	-0.172	0.432	7259	0.92
ACADVL	-3.291	18	-0.776	0.219	4179	0.855	2.51	18	0.592	0.723	11664	1.015	-2.175	12	-0.628	0.265	5280	0.776
ACAN	-0.012	18	-0.003	0.499	7782	1.046	-3.503	18	-0.826	0.204	4744	0.706	10.885	11	3.282	0.999	15260	1.013
ACAP1	-3.11	18	-0.733	0.232	4358	0.867	-0.573	18	-0.135	0.446	8128	0.899	-4.855	12	-1.402	0.081	2504	0.497
ACAP2	5.752	18	1.356	0.912	13786	1.079	-1.826	18	-0.43	0.333	6587	0.829	9.702	12	2.801	0.997	15073	1.024
ACAP3	3.412	17	0.827	0.796	11875	1.093	7.204	18	1.698	0.955	15036	1.04	-9.915	12	-2.862	0.002	345	0.094
ACAT1	0.554	18	0.131	0.552	8468	1.063	1.158	18	0.273	0.608	10168	0.978	-6.253	12	-1.805	0.036	1521	0.361
ACAT2	-8.62	18	-2.032	0.021	936	0.367	0.135	18	0.032	0.513	8990	0.934	0.018	12	0.005	0.502	8039	0.966
ACBD3	8.805	18	2.075	0.981	15300	1.046	-1.169	18	-0.276	0.391	7405	0.865	2.004	12	0.578	0.719	10536	1.055
ACBD4	4.822	18	1.137	0.872	13093	1.086	9.015	17	2.186	0.986	15696	1.028	6.809	12	1.966	0.975	14275	1.057
ACBD5	4.916	18	1.159	0.877	13193	1.084	1.385	18	0.327	0.628	10440	0.985	1.693	12	0.489	0.688	10188	1.044
ACBD6	-3.79	15	-0.979	0.164	3403	0.786	-2.681	15	-0.692	0.244	5355	0.747	-3.596	10	-1.137	0.128	3314	0.596
ACCS	1.263	17	0.306	0.62	9383	1.078	3.468	18	0.817	0.793	12555	1.034	3.033	12	0.876	0.809	11687	1.071
ACCSL	-6.564	18	-1.547	0.061	1792	0.554	-1.945	18	-0.458	0.323	6456	0.82	-4.854	11	-1.464	0.072	2318	0.478
ACD	4.441	18	1.047	0.852	12766	1.089	-2.846	18	-0.671	0.251	5442	0.756	-4.117	12	-1.188	0.117	3152	0.576
ACE	-8.015	17	-1.944	0.026	1070	0.396	-1.724	18	-0.406	0.342	6708	0.835	0.866	12	0.25	0.599	9177	1.009
ACE2	3.793	15	0.979	0.836	12529	1.089	11.136	18	2.625	0.996	16050	1.016	-3.687	12	-1.064	0.144	3587	0.619
ACER1	-5.178	18	-1.22	0.111	2613	0.694	-1.123	18	-0.265	0.396	7458	0.868	3.091	12	0.892	0.814	11744	1.072
ACER3	3.524	12	1.017	0.845	12657	1.089	-0.034	12	-0.01	0.496	8772	0.926	-0.461	8	-0.163	0.435	7305	0.921
ACHE	7.057	17	1.712	0.957	14689	1.062	-11.943	18	-2.815	0.002	455	0.088	2.06	11	0.621	0.733	10699	1.059
ACIN1	1.853	17	0.449	0.673	10097	1.088	4.39	18	1.035	0.85	13322	1.044	-1.996	12	-0.576	0.282	5508	0.793
ACLY	6.225	18	1.467	0.929	14092	1.075	9.954	18	2.346	0.991	15855	1.023	0.677	12	0.196	0.578	8901	1.004
ACMSD	2.117	18	0.499	0.691	10359	1.088	1.11	18	0.262	0.603	10110	0.977	-5.364	12	-1.548	0.061	2075	0.453
ACN9	-3.081	9	-1.027	0.152	3240	0.766	5.113	8	1.808	0.965	15225	1.037	2.41	6	0.984	0.837	12087	1.072
ACO1	-0.875	18	-0.206	0.418	6753	1.01	-4.267	18	-1.006	0.157	4043	0.637	1.101	12	0.318	0.625	9457	1.022
ACO2	7.654	15	1.976	0.976	15157	1.05	-1.932	13	-0.536	0.296	6070	0.798	0.187	10	0.059	0.524	8289	0.977
ACOT11	3.381	17	0.82	0.794	11841	1.093	-7.565	18	-1.783	0.037	1732	0.352	3.653	12	1.054	0.854	12302	1.074
ACOT12	-2.104	18	-0.496	0.31	5382	0.939	1.128	18	0.266	0.605	10133	0.977	11.784	12	3.402	1	15284	1.012
ACOT13	2.135	15	0.551	0.709	10606	1.091	-6.017	15	-1.553	0.06	2234	0.441	8.071	10	2.552	0.995	14916	1.031
ACOT7	0.04	18	0.009	0.504	7852	1.046	-3.287	18	-0.775	0.219	4975	0.721	9.242	12	2.668	0.996	14989	1.028
ACOT8	7.08	17	1.717	0.957	14705	1.061	7.051	18	1.662	0.952	14970	1.041	2.111	12	0.61	0.729	10648	1.059
ACOT9	0.249	18	0.059	0.523	8098	1.054	-0.672	18	-0.158	0.437	8015	0.893	4.838	12	1.397	0.919	13221	1.075
ACOX1	6.243	16	1.561	0.941	14343	1.07	-7.706	18	-1.816	0.035	1668	0.34	7.747	12	2.236	0.987	14606	1.046
ACOX2	3.684	18	0.868	0.807	12053	1.093	4.194	18	0.989	0.839	13164	1.043	2.932	12	0.847	0.801	11581	1.07
ACOX3	-3.11	16	-0.777	0.218	4174	0.854	4.76	17	1.154	0.876	13709	1.046	8.14	12	2.35	0.991	14727	1.04
ACOXL	9.857	18	2.323	0.99	15619	1.034	2.465	18	0.581	0.719	11625	1.013	-0.142	12	-0.041	0.484	7841	0.954
ACP2	-4.902	15	-1.266	0.103	2483	0.675	7.067	15	1.825	0.966	15245	1.037	-6.772	10	-2.142	0.016	948	0.263
ACP5	-7.501	15	-1.937	0.026	1076	0.4	-7.126	15	-1.84	0.033	1614	0.334	-8.831	10	-2.793	0.003	385	0.105
ACP6	4.388	18	1.034	0.849	12711	1.09	-4.784	18	-1.127	0.13	3583	0.593	8.283	12	2.391	0.992	14779	1.038
ACPL2	-6.329	18	-1.492	0.068	1906	0.581	-4.146	18	-0.977	0.164	4156	0.647	-1.995	12	-0.576	0.282	5510	0.793
ACPP	-4.977	18	-1.173	0.12	2741	0.716	-4.469	18	-1.053	0.146	3872	0.618	-9.866	12	-2.848	0.002	352	0.097
ACPT	-3.328	18	-0.784	0.216	4149	0.851	-3.533	18	-0.833	0.202	4714	0.703	1.063	12	0.307	0.62	9413	1.02
ACR	4.064	18	0.958	0.831	12433	1.09	-0.495	18	-0.117	0.454	8242	0.901	-3.846	12	-1.11	0.133	3403	0.606
ACRBP	-0.718	18	-0.169	0.433	6928	1.019	3.925	18	0.925	0.823	12933	1.041	-2.779	12	-0.802	0.211	4572	0.715
ACRC	7.105	18	1.675	0.953	14606	1.064	3.739	18	0.881	0.811	12773	1.039	2.625	12	0.758	0.776	11265	1.065
ACSBG1	11.718	18	2.762	0.997	15953	1.019	-3.362	18	-0.792	0.214	4875	0.719	3.87	12	1.117	0.868	12500	1.074
ACSBG2	1.108	18	0.261	0.603	9147	1.075	0.231	18	0.054	0.522	9097	0.939	-5.063	12	-1.461	0.072	2326	0.478
ACSF2	-4.088	18	-0.964	0.168	3453	0.792	6.156	18	1.451	0.927	14512	1.045	-2.766	10	-0.875	0.191	4285	0.689
ACSF3	9.048	17	2.195	0.986	15453	1.041	3.554	18	0.838	0.799	12616	1.037	-5.106	12	-1.474	0.07	2292	0.474
ACSL1	-12.939	18	-3.05	0.001	210	0.089	-2.141	18	-0.505	0.307	6211	0.809	-2.833	11	-0.854	0.197	4367	0.696
ACSL3	-7.217	18	-1.701	0.044	1474	0.492	3.656	18	0.862	0.806	12714	1.037	1.157	12	0.334	0.631	9533	1.024
ACSL4	-1.968	18	-0.464	0.321	5500	0.953	-3.277	18	-0.772	0.22	4987	0.722	-16.761	11	-5.054	0	10	0
ACSL5	5.717	18	1.348	0.911	13758	1.08	-4.643	18	-1.094	0.137	3714	0.603	1.355	12	0.391	0.652	9787	1.031
ACSL6	-9.238	16	-2.31	0.01	635	0.269	-2.791	17	-0.677	0.249	5405	0.755	-2.485	12	-0.717	0.237	4932	0.742
ACSM1	5.456	18	1.286	0.901	13564	1.083	-5.025	18	-1.184	0.118	3377	0.573	3.276	12	0.946	0.828	11949	1.072
ACSM2B	2.058	9	0.686	0.754	11244	1.093	-0.026	9	-0.009	0.497	8780	0.926	4.105	6	1.676	0.953	13805	1.068
ACSM3	-0.041	17	-0.01	0.496	7737	1.046	-1.383	18	-0.326	0.372	7130	0.855	7.074	12	2.042	0.979	14384	1.053
ACSM4	1.854	18	0.437	0.669	10022	1.089	4.019	18	0.947	0.828	13025	1.041	-2.295	12	-0.662	0.254	5155	0.762
ACSM5	-5.598	15	-1.445	0.074	2019	0.599	0.256	15	0.066	0.526	9156	0.941	-1.231	10	-0.389	0.349	6349	0.849
ACSS1	3.594	18	0.847	0.802	11959	1.093	12.411	18	2.925	0.998	16187	1.01	2.593	12	0.748	0.773	11225	1.065
ACSS2	4.059	18	0.957	0.831	12426	1.09	-2.629	18	-0.62	0.268	5696	0.769	-4.788	12	-1.382	0.083	2560	0.504
ACSS3	1.418	18	0.334	0.631	9508	1.082	5.679	18	1.338	0.91	14219	1.047	0.906	12	0.262	0.603	9220	1.012
ACTA1	-1.611	18	-0.38	0.352	5920	0.97	9.56	16	2.39	0.992	15893	1.021	3.794	12	1.095	0.863	12433	1.074
ACTA2	-4.448	18	-1.048	0.147	3160	0.76	-3.821	18	-0.901	0.184	4447	0.677	-5.183	12	-1.496	0.067	2224	0.468
ACTBL2	4.419	17	1.072	0.858	12849	1.089	4.382	18	1.033	0.849	13309	1.044	9.235	12	2.666	0.996	14987	1.028
ACTC1	-2.445	15	-0.631	0.264	4784	0.9	4.961	15	1.281	0.9	14060	1.048	2.383	10	0.754	0.774	11249	1.065
ACTG2	2.185	18	0.515	0.697	10430	1.09	-2.065	18	-0.487	0.313	6307	0.813	7.109	12	2.052	0.98	14399	1.053
ACTL10	0.849	14	0.227	0.59	8986	1.07	2.934	14	0.784	0.784	12445	1.031	-10.219	10	-3.232	0.001	208	0.046
ACTL6A	7.306	11	2.203	0.986	15463	1.04	-0.473	13	-0.131	0.448	8154	0.899	-2.799	7	-1.058	0.145	3611	0.621
ACTL6B	-6.337	18	-1.494	0.068	1898	0.581	5.396	18	1.272	0.898	14039	1.047	3.435	12	0.991	0.839	12106	1.072
ACTL7A	4.48	15	1.157	0.876	13179	1.085	-3.476	15	-0.898	0.185	4458	0.678	-5.774	10	-1.826	0.034	1483	0.354
ACTL7B	2.924	15	0.755	0.775	11547	1.094	-2.827	15	-0.73	0.233	5188	0.734	4.012	10	1.269	0.898	12908	1.076
ACTL8	3.597	17	0.872	0.808	12067	1.093	3.404	18	0.802	0.789	12508	1.032	-2.168	12	-0.626	0.266	5284	0.778
ACTL9	-11.026	17	-2.674	0.004	353	0.173	-5.702	18	-1.344	0.089	2838	0.516	7.798	11	2.351	0.991	14729	1.04
ACTN1	0.169	18	0.04	0.516	8000	1.052	-0.774	18	-0.183	0.428	7899	0.886	-4.708	12	-1.359	0.087	2635	0.511
ACTN2	1.054	17	0.256	0.601	9124	1.074	12.045	18	2.839	0.998	16156	1.011	5.071	12	1.464	0.928	13365	1.074
ACTN3	9.698	18	2.286	0.989	15579	1.035	6.412	18	1.511	0.935	14660	1.044	5.057	12	1.46	0.928	13358	1.074
ACTN4	7.143	18	1.684	0.954	14630	1.063	-3.173	18	-0.748	0.227	5104	0.729	5.081	12	1.467	0.929	13368	1.075
ACTR1A	1.384	11	0.417	0.662	9944	1.085	-3.371	15	-0.87	0.192	4551	0.691	-3.943	9	-1.314	0.094	2755	0.53
ACTR1B	-1.603	17	-0.389	0.349	5876	0.968	-3.083	18	-0.727	0.234	5199	0.736	1.521	12	0.439	0.67	9980	1.038
ACTR3B	10.567	18	2.491	0.994	15773	1.027	-1.038	18	-0.245	0.403	7543	0.875	5.912	12	1.707	0.956	13861	1.067
ACTR5	10.463	18	2.466	0.993	15746	1.029	0.797	18	0.188	0.575	9771	0.963	-6.284	12	-1.814	0.035	1504	0.358
ACTR6	-2.333	13	-0.647	0.259	4713	0.896	4.796	15	1.238	0.892	13943	1.047	-4.124	9	-1.375	0.085	2584	0.507
ACTR8	-11.28	17	-2.736	0.003	327	0.155	-3.116	17	-0.756	0.225	5063	0.727	-6.871	10	-2.173	0.015	896	0.257
ACTRT1	4.412	15	1.139	0.873	13102	1.086	3.929	15	1.015	0.845	13252	1.044	-1.743	10	-0.551	0.291	5619	0.8
ACTRT2	-4.079	13	-1.131	0.129	2877	0.731	-0.567	15	-0.146	0.442	8070	0.896	-4.838	10	-1.53	0.063	2128	0.458
ACTRT3	-0.721	18	-0.17	0.433	6924	1.019	-6.078	18	-1.432	0.076	2564	0.485	-0.03	12	-0.009	0.497	7983	0.962
ACVR1	-3.235	18	-0.763	0.223	4235	0.858	6.96	18	1.64	0.95	14923	1.042	6.718	12	1.939	0.974	14233	1.058
ACVR1B	-0.664	17	-0.161	0.436	6972	1.02	-4.888	18	-1.152	0.125	3487	0.585	-1.458	12	-0.421	0.337	6201	0.84
ACVR1C	0.837	18	0.197	0.578	8826	1.068	1.026	18	0.242	0.596	10019	0.973	-2.613	12	-0.754	0.225	4766	0.731
ACVR2A	10.675	18	2.516	0.994	15798	1.026	-2.414	18	-0.569	0.285	5912	0.788	0.04	12	0.011	0.505	8067	0.967
ACVR2B	-6.852	17	-1.662	0.048	1545	0.509	-11.088	18	-2.613	0.004	588	0.125	2.793	12	0.806	0.79	11434	1.069
ACVRL1	-1.534	17	-0.372	0.355	5956	0.972	-0.098	18	-0.023	0.491	8708	0.923	7.12	12	2.055	0.98	14403	1.052
ACY1	-3.823	18	-0.901	0.184	3705	0.809	-4.582	18	-1.08	0.14	3770	0.608	3.921	12	1.132	0.871	12536	1.075
ACY3	0.305	18	0.072	0.529	8165	1.056	7.404	18	1.745	0.96	15114	1.039	-2.405	12	-0.694	0.244	5022	0.751
ACYP1	-0.518	9	-0.173	0.432	6912	1.018	1.367	9	0.456	0.676	11033	1.002	0.733	6	0.299	0.618	9386	1.018
ACYP2	3.115	12	0.899	0.816	12194	1.091	0.071	12	0.021	0.508	8929	0.932	3.887	8	1.374	0.915	13177	1.074
ADA	0.75	18	0.177	0.57	8719	1.066	2.377	18	0.56	0.712	11520	1.012	3.746	11	1.13	0.871	12528	1.075
ADAD1	-4.646	18	-1.095	0.137	3002	0.743	-0.969	18	-0.228	0.41	7641	0.878	7.648	12	2.208	0.986	14569	1.047
ADAD2	5.607	18	1.322	0.907	13666	1.082	7.644	18	1.802	0.964	15210	1.038	7.022	12	2.027	0.979	14352	1.055
ADAL	14.272	18	3.364	1	16178	1.008	-7.455	18	-1.757	0.039	1784	0.362	0.492	12	0.142	0.557	8674	0.992
ADAM10	10.148	18	2.392	0.992	15682	1.031	17.278	18	4.073	1	16347	1.001	1.405	12	0.406	0.657	9855	1.032
ADAM11	2.112	18	0.498	0.691	10356	1.088	4.699	18	1.107	0.866	13556	1.046	-7.896	11	-2.381	0.009	676	0.198
ADAM12	-6.459	18	-1.522	0.064	1834	0.569	3.238	18	0.763	0.777	12365	1.029	-0.524	12	-0.151	0.44	7348	0.926
ADAM15	-6.057	17	-1.469	0.071	1971	0.587	-1.743	18	-0.411	0.341	6687	0.834	-9.268	12	-2.675	0.004	468	0.123
ADAM17	-2.25	18	-0.53	0.298	5217	0.931	-8.54	18	-2.013	0.022	1310	0.276	-2.869	12	-0.828	0.204	4469	0.705
ADAM18	4.546	18	1.072	0.858	12846	1.089	3.012	18	0.71	0.761	12146	1.026	-1.936	12	-0.559	0.288	5585	0.798
ADAM19	2.949	18	0.695	0.757	11283	1.094	-9.953	18	-2.346	0.009	834	0.186	3.748	12	1.082	0.86	12397	1.073
ADAM2	2.069	18	0.488	0.687	10306	1.087	0.515	18	0.121	0.548	9437	0.951	3.992	12	1.152	0.875	12594	1.075
ADAM20	-1.418	12	-0.409	0.341	5782	0.962	2.528	12	0.73	0.767	12223	1.028	-2.239	8	-0.791	0.214	4612	0.719
ADAM22	-5.314	18	-1.252	0.105	2530	0.678	-3.445	18	-0.812	0.208	4801	0.71	-2.176	12	-0.628	0.265	5278	0.776
ADAM23	-1.36	18	-0.32	0.374	6215	0.982	3.392	18	0.799	0.788	12496	1.032	-3.316	12	-0.957	0.169	3995	0.655
ADAM28	-7.11	18	-1.676	0.047	1518	0.504	0.628	18	0.148	0.559	9566	0.956	-2.356	12	-0.68	0.248	5086	0.755
ADAM29	-7.172	12	-2.07	0.019	874	0.359	0.975	12	0.281	0.611	10214	0.979	-2.248	8	-0.795	0.213	4599	0.717
ADAM30	-1.816	18	-0.428	0.334	5683	0.959	6.326	18	1.491	0.932	14605	1.045	4.912	12	1.418	0.922	13268	1.075
ADAM32	5.222	18	1.231	0.891	13418	1.083	-0.1	18	-0.023	0.491	8705	0.923	0.813	12	0.235	0.593	9100	1.008
ADAM33	-7.22	18	-1.702	0.044	1472	0.492	2.38	18	0.561	0.713	11526	1.012	-2.858	12	-0.825	0.205	4483	0.706
ADAM7	-10.801	18	-2.546	0.005	440	0.202	-8.374	18	-1.974	0.024	1364	0.29	-1.133	12	-0.327	0.372	6617	0.869
ADAM8	-8.061	18	-1.9	0.029	1122	0.417	1.606	18	0.379	0.648	10678	0.993	-1.423	12	-0.411	0.341	6253	0.842
ADAM9	7.055	17	1.711	0.956	14688	1.062	1.046	18	0.247	0.597	10046	0.973	4.15	11	1.251	0.895	12866	1.075
ADAMDEC1	-2.917	18	-0.688	0.246	4538	0.884	6.901	18	1.627	0.948	14890	1.042	-2.022	12	-0.584	0.28	5473	0.79
ADAMTS1	-0.861	18	-0.203	0.42	6766	1.011	6.794	18	1.601	0.945	14834	1.043	6.656	12	1.922	0.973	14212	1.059
ADAMTS10	3.547	16	0.887	0.812	12131	1.092	-12.181	18	-2.871	0.002	422	0.079	3.294	12	0.951	0.829	11968	1.072
ADAMTS12	-14.193	18	-3.345	0	134	0.05	4.834	17	1.172	0.879	13757	1.047	9.746	12	2.813	0.998	15077	1.023
ADAMTS13	3.077	18	0.725	0.766	11412	1.095	-4.967	18	-1.171	0.121	3422	0.578	-5.488	12	-1.584	0.057	2002	0.437
ADAMTS14	2.945	18	0.694	0.756	11276	1.094	10.473	18	2.468	0.993	15947	1.02	2.306	12	0.666	0.747	10899	1.06
ADAMTS15	6.211	18	1.464	0.928	14081	1.075	2.083	18	0.491	0.688	11212	1.005	-0.288	12	-0.083	0.467	7655	0.943
ADAMTS16	1.889	18	0.445	0.672	10069	1.088	4.184	18	0.986	0.838	13151	1.043	0.998	12	0.288	0.613	9334	1.016
ADAMTS17	2.282	18	0.538	0.705	10534	1.091	1.209	18	0.285	0.612	10229	0.98	1.974	12	0.57	0.716	10501	1.054
ADAMTS18	-6.855	18	-1.616	0.053	1656	0.523	-2.524	18	-0.595	0.276	5806	0.778	4.253	12	1.228	0.89	12809	1.075
ADAMTS19	3.613	18	0.852	0.803	11983	1.093	-5.773	18	-1.361	0.087	2793	0.509	-7.556	12	-2.181	0.015	886	0.255
ADAMTS2	9.548	16	2.387	0.992	15677	1.032	-10.144	18	-2.391	0.008	785	0.175	0.714	11	0.215	0.585	8994	1.006
ADAMTS20	9.26	18	2.183	0.985	15437	1.041	2.048	18	0.483	0.685	11175	1.004	-4.322	12	-1.248	0.106	2961	0.554
ADAMTS3	-11.482	18	-2.706	0.003	338	0.164	-4.181	18	-0.985	0.162	4125	0.644	-1.649	12	-0.476	0.317	5951	0.824
ADAMTS4	-2.764	16	-0.691	0.245	4524	0.883	1.95	17	0.473	0.682	11120	1.004	2.667	10	0.844	0.801	11571	1.07
ADAMTS5	5.686	18	1.34	0.91	13734	1.081	-3.988	18	-0.94	0.174	4282	0.664	-1.536	12	-0.443	0.329	6103	0.833
ADAMTS6	1.704	18	0.402	0.656	9862	1.085	8.304	18	1.957	0.975	15421	1.035	-8.592	12	-2.48	0.007	603	0.168
ADAMTS7	-2.072	18	-0.488	0.313	5407	0.943	-1.494	18	-0.352	0.362	6991	0.848	-1.759	12	-0.508	0.306	5798	0.816
ADAMTS8	6.22	17	1.508	0.934	14197	1.073	-0.748	17	-0.181	0.428	7907	0.886	8.672	12	2.504	0.994	14875	1.033
ADAMTS9	5.781	18	1.363	0.913	13808	1.079	-5.211	17	-1.264	0.103	3102	0.544	0.138	12	0.04	0.516	8194	0.974
ADAMTSL1	-4.282	18	-1.009	0.156	3297	0.774	10.146	18	2.391	0.992	15896	1.021	-2.793	12	-0.806	0.21	4551	0.714
ADAMTSL2	-4.933	18	-1.163	0.122	2782	0.718	-0.346	18	-0.082	0.467	8429	0.908	-8.357	12	-2.412	0.008	649	0.189
ADAMTSL3	6.782	18	1.599	0.945	14427	1.068	4.034	18	0.951	0.829	13038	1.041	-2.053	12	-0.593	0.277	5434	0.788
ADAMTSL4	5.647	18	1.331	0.908	13704	1.081	0.23	18	0.054	0.522	9096	0.939	-8.39	12	-2.422	0.008	642	0.186
ADAMTSL5	-9.577	17	-2.323	0.01	623	0.264	-7.427	17	-1.801	0.036	1696	0.346	9.525	12	2.75	0.997	15036	1.026
ADAP1	-0.792	18	-0.187	0.426	6847	1.015	-2.966	18	-0.699	0.242	5318	0.746	-0.508	12	-0.147	0.442	7367	0.927
ADAP2	5.828	18	1.374	0.915	13841	1.078	-2.036	18	-0.48	0.316	6336	0.816	-3.029	12	-0.875	0.191	4286	0.689
ADAR	-4.82	18	-1.136	0.128	2864	0.729	5.587	18	1.317	0.906	14159	1.048	-2.756	12	-0.796	0.213	4598	0.717
ADARB1	-1.259	18	-0.297	0.383	6337	0.987	8.208	18	1.935	0.973	15395	1.035	-1.887	12	-0.545	0.293	5647	0.802
ADARB2	-3.719	18	-0.877	0.19	3819	0.813	7.333	17	1.779	0.962	15168	1.039	2.452	12	0.708	0.76	11063	1.063
ADAT1	11.161	18	2.631	0.996	15875	1.023	-1.356	18	-0.32	0.375	7157	0.857	-0.888	12	-0.256	0.399	6921	0.891
ADAT2	3.56	12	1.028	0.848	12687	1.09	0.571	12	0.165	0.565	9648	0.959	-1.328	8	-0.469	0.319	5989	0.825
ADAT3	1.209	10	0.382	0.649	9746	1.086	-6.835	12	-1.973	0.024	1367	0.29	1.711	8	0.605	0.727	10620	1.059
ADC	1.22	18	0.288	0.613	9276	1.078	-2.107	18	-0.497	0.31	6248	0.812	-3.738	12	-1.079	0.14	3534	0.614
ADCK1	-1.032	18	-0.243	0.404	6599	0.998	-2.748	18	-0.648	0.259	5558	0.762	0.157	12	0.045	0.518	8228	0.974
ADCK2	-2.053	17	-0.498	0.309	5370	0.939	1.211	18	0.285	0.612	10232	0.98	-7.626	12	-2.201	0.014	870	0.246
ADCK3	1.843	18	0.435	0.668	10012	1.088	4.128	18	0.973	0.835	13113	1.042	3.267	12	0.943	0.827	11941	1.071
ADCK4	-2.789	18	-0.657	0.255	4676	0.891	-5.829	18	-1.374	0.085	2749	0.504	10.638	11	3.207	0.999	15234	1.015
ADCK5	3.2	17	0.776	0.781	11627	1.096	-0.624	18	-0.147	0.442	8064	0.896	2.705	11	0.816	0.793	11471	1.069
ADCY1	-2.838	18	-0.669	0.252	4622	0.888	11.219	18	2.644	0.996	16066	1.015	1.437	12	0.415	0.661	9902	1.032
ADCY10	-2.012	18	-0.474	0.318	5460	0.949	-2.075	18	-0.489	0.312	6294	0.813	-5.034	12	-1.453	0.073	2355	0.48
ADCY2	-1.946	18	-0.459	0.323	5525	0.954	0.43	18	0.101	0.54	9343	0.947	0.588	12	0.17	0.567	8792	0.998
ADCY3	0.5	18	0.118	0.547	8406	1.061	-2.907	18	-0.685	0.247	5381	0.75	0.326	12	0.094	0.537	8468	0.982
ADCY4	-10.983	18	-2.589	0.005	404	0.194	1.714	18	0.404	0.657	10800	0.996	-1.591	12	-0.459	0.323	6032	0.828
ADCY5	3.508	18	0.827	0.796	11874	1.093	-5.062	18	-1.193	0.116	3341	0.57	-3.723	12	-1.075	0.141	3548	0.616
ADCY6	-3.808	18	-0.898	0.185	3725	0.809	-2.041	18	-0.481	0.315	6331	0.815	2.215	12	0.639	0.739	10784	1.059
ADCY7	12.077	18	2.846	0.998	16011	1.016	3.325	18	0.784	0.783	12443	1.031	8.013	12	2.313	0.99	14686	1.042
ADCY8	-5.249	18	-1.237	0.108	2574	0.684	6.029	18	1.421	0.922	14453	1.045	1.596	12	0.461	0.677	10077	1.04
ADCY9	5.735	18	1.352	0.912	13772	1.08	-7.762	18	-1.83	0.034	1637	0.337	-2.23	12	-0.644	0.26	5223	0.77
ADCYAP1	-7.819	18	-1.843	0.033	1192	0.447	-4.707	17	-1.142	0.127	3527	0.589	-1.778	12	-0.513	0.304	5771	0.814
ADCYAP1R1	-4.966	18	-1.171	0.121	2752	0.717	-5.653	18	-1.332	0.091	2874	0.52	3.169	11	0.956	0.83	11985	1.072
ADD1	7.171	15	1.852	0.968	14967	1.055	-5.425	15	-1.401	0.081	2661	0.496	2.691	9	0.897	0.815	11757	1.072
ADD2	7.438	18	1.753	0.96	14766	1.061	-3.398	18	-0.801	0.212	4840	0.716	-3.102	12	-0.895	0.185	4200	0.682
ADD3	1.2	12	0.346	0.635	9565	1.084	-0.942	12	-0.272	0.393	7423	0.866	-1.846	8	-0.653	0.257	5197	0.765
ADGB	1.366	18	0.322	0.626	9451	1.081	7.992	18	1.884	0.97	15329	1.036	-3.014	12	-0.87	0.192	4305	0.69
ADH4	-1.129	15	-0.292	0.385	6356	0.989	-3.998	15	-1.032	0.151	3946	0.626	5.735	10	1.813	0.965	14057	1.062
ADH6	1.871	17	0.454	0.675	10121	1.088	-3.792	18	-0.894	0.186	4469	0.68	-3.521	11	-1.062	0.144	3598	0.62
ADH7	7.409	18	1.746	0.96	14750	1.061	-2.072	18	-0.488	0.313	6300	0.812	-3.523	12	-1.017	0.155	3774	0.634
ADHFE1	-5.806	18	-1.369	0.086	2201	0.634	0.575	18	0.136	0.554	9506	0.954	-4.656	11	-1.404	0.08	2498	0.497
ADI1	-3.138	18	-0.74	0.23	4336	0.864	2.132	18	0.502	0.692	11263	1.006	-4.364	12	-1.26	0.104	2925	0.549
ADIG	-1.785	18	-0.421	0.337	5723	0.96	-11.463	18	-2.702	0.003	514	0.11	-5.442	11	-1.641	0.05	1865	0.418
ADIPOQ	13.538	18	3.191	0.999	16128	1.011	10.184	18	2.4	0.992	15902	1.021	8.524	12	2.461	0.993	14846	1.035
ADIPOR1	-4.657	12	-1.344	0.089	2255	0.647	2.681	12	0.774	0.78	12410	1.03	-0.398	8	-0.141	0.444	7400	0.928
ADIPOR2	-1.491	18	-0.351	0.363	6063	0.976	-0.818	18	-0.193	0.424	7848	0.883	0.056	12	0.016	0.506	8095	0.968
ADIRF	5.993	15	1.547	0.939	14307	1.071	-0.866	15	-0.224	0.412	7664	0.879	-4.637	10	-1.466	0.071	2314	0.477
ADK	2.47	18	0.582	0.72	10760	1.091	1.448	18	0.341	0.634	10513	0.987	3.88	12	1.12	0.869	12506	1.074
ADM	1.618	18	0.381	0.649	9742	1.086	5.144	18	1.212	0.887	13876	1.047	2.306	11	0.695	0.757	11015	1.062
ADM2	2.904	15	0.75	0.773	11526	1.094	-2.942	15	-0.76	0.224	5045	0.726	-2.571	10	-0.813	0.208	4525	0.711
ADM5	-9.838	18	-2.319	0.01	627	0.265	-0.151	18	-0.036	0.486	8652	0.919	-4.643	12	-1.34	0.09	2679	0.52
ADNP	-2.474	15	-0.639	0.261	4746	0.899	3.812	15	0.984	0.838	13146	1.043	-7.916	10	-2.503	0.006	587	0.162
ADNP2	-0.007	15	-0.002	0.499	7791	1.045	-1.588	15	-0.41	0.341	6693	0.834	-1.25	10	-0.395	0.346	6322	0.847
ADO	4.106	15	1.06	0.855	12810	1.089	5.028	15	1.298	0.903	14096	1.049	6.254	10	1.978	0.976	14290	1.056
ADORA1	1.272	18	0.3	0.618	9345	1.078	-0.934	18	-0.22	0.413	7678	0.88	-4.212	12	-1.216	0.112	3058	0.566
ADORA2A	-2.741	18	-0.646	0.259	4720	0.895	-1.23	18	-0.29	0.386	7329	0.862	3.15	12	0.909	0.818	11811	1.072
ADORA2B	-4.587	18	-1.081	0.14	3045	0.749	-4.254	18	-1.003	0.158	4058	0.637	0.894	12	0.258	0.602	9201	1.012
ADORA3	13.402	18	3.159	0.999	16119	1.011	-9.898	18	-2.333	0.01	846	0.19	0.624	12	0.18	0.571	8833	1.001
ADPGK	6.736	18	1.588	0.944	14406	1.069	1.815	18	0.428	0.666	10921	0.998	-7.159	12	-2.067	0.019	1052	0.285
ADPRH	-2.7	17	-0.655	0.256	4690	0.891	-5.409	18	-1.275	0.101	3061	0.541	-4.822	11	-1.454	0.073	2353	0.48
ADPRHL1	0.639	18	0.151	0.56	8573	1.065	4.193	18	0.988	0.839	13163	1.043	-1.516	12	-0.438	0.331	6126	0.835
ADPRHL2	7.12	18	1.678	0.953	14616	1.064	-4.637	18	-1.093	0.137	3721	0.604	3.827	12	1.105	0.865	12458	1.074
ADPRM	6.376	18	1.503	0.934	14180	1.074	-5.966	18	-1.406	0.08	2637	0.496	-4.054	12	-1.17	0.121	3197	0.585
ADRA1A	-5.546	18	-1.307	0.096	2362	0.66	4.342	18	1.023	0.847	13277	1.044	0.847	12	0.244	0.597	9150	1.008
ADRA1B	-4.68	18	-1.103	0.135	2975	0.74	-0.942	17	-0.229	0.41	7638	0.878	2.414	12	0.697	0.757	11019	1.063
ADRA1D	3.766	18	0.888	0.813	12133	1.092	5.167	18	1.218	0.888	13898	1.046	4.296	12	1.24	0.893	12841	1.075
ADRA2A	-2.898	18	-0.683	0.247	4562	0.884	-6.8	18	-1.603	0.054	2106	0.423	0.435	12	0.126	0.55	8602	0.989
ADRA2B	2.316	17	0.562	0.713	10656	1.091	-3.822	18	-0.901	0.184	4446	0.677	6.521	12	1.882	0.97	14156	1.06
ADRA2C	-0.467	16	-0.117	0.453	7180	1.03	-0.581	17	-0.141	0.444	8099	0.897	1.805	10	0.571	0.716	10506	1.054
ADRB1	3.429	18	0.808	0.79	11780	1.094	2.894	18	0.682	0.752	12044	1.023	1.953	12	0.564	0.714	10468	1.054
ADRB2	-1.75	18	-0.413	0.34	5768	0.961	-0.026	18	-0.006	0.498	8796	0.926	-5.123	12	-1.479	0.07	2277	0.473
ADRB3	-3.932	12	-1.135	0.128	2867	0.729	-5.507	12	-1.59	0.056	2144	0.427	4.67	8	1.651	0.951	13751	1.069
ADRBK1	-11.679	18	-2.753	0.003	320	0.151	-8.414	18	-1.983	0.024	1349	0.287	5.917	12	1.708	0.956	13865	1.067
ADRBK2	7.039	18	1.659	0.951	14571	1.065	-3.446	18	-0.812	0.208	4798	0.711	-6.637	12	-1.916	0.028	1326	0.323
ADRM1	-0.291	18	-0.069	0.473	7435	1.037	0.832	18	0.196	0.578	9810	0.964	-5.906	12	-1.705	0.044	1738	0.393
ADSL	3.968	18	0.935	0.825	12332	1.091	-11.11	18	-2.619	0.004	584	0.124	5.328	12	1.538	0.938	13540	1.071
ADSSL1	-0.791	18	-0.187	0.426	6849	1.015	-0.454	18	-0.107	0.457	8291	0.903	1.776	12	0.513	0.696	10280	1.047
ADTRP	2.801	15	0.723	0.765	11405	1.094	-2.408	15	-0.622	0.267	5689	0.768	-0.353	9	-0.118	0.453	7505	0.934
AEBP1	-1.56	18	-0.368	0.357	5977	0.973	0.304	18	0.072	0.529	9191	0.941	-12.054	12	-3.48	0	144	0.027
AEBP2	-4.456	18	-1.05	0.147	3150	0.76	11.329	18	2.67	0.996	16083	1.014	1.603	12	0.463	0.678	10085	1.04
AEN	-0.64	17	-0.155	0.438	6994	1.022	4.526	17	1.098	0.864	13521	1.046	-2.223	11	-0.67	0.251	5124	0.759
AES	-1.827	17	-0.443	0.329	5600	0.958	-2.399	17	-0.582	0.28	5855	0.784	-1.348	10	-0.426	0.335	6172	0.839
AFAP1	-4.349	18	-1.025	0.153	3248	0.767	-5.066	18	-1.194	0.116	3332	0.571	-2.304	12	-0.665	0.253	5145	0.761
AFAP1L1	1.096	18	0.258	0.602	9136	1.075	5.531	18	1.304	0.904	14114	1.048	-7.258	12	-2.095	0.018	1010	0.277
AFAP1L2	12.377	17	3.002	0.999	16074	1.013	3.037	18	0.716	0.763	12168	1.026	-0.853	11	-0.257	0.399	6917	0.891
AFF1	-4.363	18	-1.028	0.152	3237	0.765	6.389	18	1.506	0.934	14651	1.044	2.908	12	0.839	0.799	11557	1.07
AFF2	13.7	18	3.229	0.999	16139	1.01	-12.268	17	-2.975	0.001	364	0.066	1.18	12	0.341	0.633	9563	1.024
AFF3	-0.814	18	-0.192	0.424	6819	1.014	4.267	18	1.006	0.843	13230	1.043	9.74	12	2.812	0.998	15076	1.023
AFF4	5.711	18	1.346	0.911	13755	1.08	0.892	18	0.21	0.583	9871	0.967	6.258	12	1.807	0.965	14048	1.062
AFG3L2	1.053	12	0.304	0.619	9366	1.079	-11.29	17	-2.738	0.003	498	0.101	4.927	10	1.558	0.94	13575	1.071
AFM	2.628	9	0.876	0.809	12081	1.093	6.499	9	2.166	0.985	15667	1.029	-1.641	6	-0.67	0.251	5125	0.759
AFMID	-7.692	18	-1.813	0.035	1255	0.454	-2.087	18	-0.492	0.311	6277	0.812	6.185	12	1.786	0.963	14010	1.063
AFP	-4.339	17	-1.052	0.146	3142	0.759	2.896	18	0.683	0.753	12047	1.023	5.064	12	1.462	0.928	13361	1.074
AFTPH	-12.298	15	-3.175	0.001	173	0.071	-2.657	17	-0.644	0.26	5578	0.762	7.457	12	2.153	0.984	14514	1.049
AGA	4.783	18	1.127	0.87	13069	1.086	3.988	18	0.94	0.826	12991	1.041	5.273	12	1.522	0.936	13505	1.072
AGAP1	8.364	18	1.971	0.976	15151	1.05	0.935	18	0.22	0.587	9914	0.97	3.351	12	0.967	0.833	12026	1.072
AGAP2	2.048	18	0.483	0.685	10277	1.088	3.085	18	0.727	0.766	12215	1.027	-5.636	10	-1.782	0.037	1566	0.369
AGAP3	3.723	15	0.961	0.832	12446	1.09	-0.782	15	-0.202	0.42	7797	0.882	6.216	10	1.966	0.975	14273	1.057
AGBL1	3.581	18	0.844	0.801	11952	1.093	-1.186	18	-0.28	0.39	7383	0.864	-0.142	12	-0.041	0.484	7840	0.954
AGBL2	9.475	18	2.233	0.987	15503	1.039	-5.655	18	-1.333	0.091	2871	0.52	-6.845	10	-2.165	0.015	911	0.258
AGBL3	-7.517	18	-1.772	0.038	1336	0.466	-0.619	18	-0.146	0.442	8074	0.896	-3.616	12	-1.044	0.148	3663	0.626
AGBL4	-1.121	17	-0.272	0.393	6457	0.992	2.928	18	0.69	0.755	12079	1.023	-9.527	12	-2.75	0.003	405	0.114
AGBL5	2.149	18	0.507	0.694	10393	1.089	4.314	18	1.017	0.845	13259	1.044	6.012	12	1.736	0.959	13905	1.066
AGER	-2.887	17	-0.7	0.242	4491	0.879	-2.909	17	-0.706	0.24	5298	0.742	-2.334	12	-0.674	0.25	5115	0.757
AGFG1	-2.669	18	-0.629	0.265	4792	0.901	-7.72	18	-1.82	0.034	1658	0.34	-5.215	12	-1.505	0.066	2195	0.466
AGFG2	-5.988	18	-1.411	0.079	2093	0.616	-3.556	18	-0.838	0.201	4695	0.701	2.702	12	0.78	0.782	11334	1.068
AGGF1	0.028	9	0.009	0.504	7851	1.046	-1.466	9	-0.489	0.313	6297	0.813	-2.579	6	-1.053	0.146	3626	0.624
AGL	-3.024	18	-0.713	0.238	4440	0.874	-4.867	18	-1.147	0.126	3506	0.587	3.513	12	1.014	0.845	12182	1.073
AGMAT	-5.226	18	-1.232	0.109	2585	0.688	-3.743	18	-0.882	0.189	4515	0.685	0.929	12	0.268	0.606	9251	1.013
AGMO	-1.133	17	-0.275	0.392	6441	0.992	-2.312	18	-0.545	0.293	6025	0.796	-9.129	12	-2.635	0.004	495	0.131
AGO1	-5.434	18	-1.281	0.1	2436	0.67	5.472	18	1.29	0.901	14074	1.049	-2.635	12	-0.761	0.223	4751	0.727
AGO2	-7.969	18	-1.878	0.03	1152	0.427	-9.386	18	-2.212	0.013	1020	0.216	8.256	12	2.383	0.991	14772	1.038
AGO3	5.707	18	1.345	0.911	13750	1.08	-2.028	18	-0.478	0.316	6349	0.816	-4.24	10	-1.341	0.09	2677	0.52
AGO4	-0.117	18	-0.028	0.489	7653	1.042	-10.377	18	-2.446	0.007	727	0.163	5.576	10	1.763	0.961	13966	1.064
AGPAT1	2.026	18	0.477	0.683	10256	1.087	3.839	18	0.905	0.817	12861	1.04	1.354	12	0.391	0.652	9786	1.031
AGPAT2	-12.327	17	-2.99	0.001	226	0.101	-2.374	18	-0.56	0.288	5957	0.791	5.537	12	1.598	0.945	13655	1.07
AGPAT3	7.806	17	1.893	0.971	15039	1.053	-1.808	18	-0.426	0.335	6609	0.83	-0.454	12	-0.131	0.448	7444	0.931
AGPAT4	1.751	18	0.413	0.66	9916	1.086	-9.601	18	-2.263	0.012	944	0.205	-3.472	11	-1.047	0.148	3649	0.625
AGPAT5	-2.461	15	-0.635	0.263	4766	0.899	6.917	15	1.786	0.963	15182	1.038	-2.533	10	-0.801	0.212	4574	0.715
AGPAT6	-4.625	17	-1.122	0.131	2911	0.734	0.04	18	0.009	0.504	8869	0.93	-2.521	12	-0.728	0.233	4878	0.74
AGPAT9	1.836	18	0.433	0.667	10000	1.089	-2.935	18	-0.692	0.245	5358	0.747	-1.611	12	-0.465	0.321	6014	0.826
AGPS	2.249	18	0.53	0.702	10495	1.091	15.143	18	3.569	1	16317	1.003	3.861	12	1.114	0.867	12485	1.075
AGR2	11.324	9	3.775	1	16252	1.003	-2.458	9	-0.819	0.206	4771	0.708	-2.533	6	-1.034	0.151	3694	0.63
AGRN	-2.664	15	-0.688	0.246	4536	0.884	2.264	18	0.534	0.703	11407	1.009	12.355	12	3.566	1	15318	1.01
AGRP	0.94	18	0.222	0.588	8955	1.07	-7.764	18	-1.83	0.034	1636	0.337	3.163	12	0.913	0.819	11831	1.071
AGT	-0.892	15	-0.23	0.409	6660	1.002	0.142	15	0.037	0.515	9015	0.935	-1.145	10	-0.362	0.359	6472	0.857
AGTPBP1	3.388	18	0.798	0.788	11730	1.095	-0.116	18	-0.027	0.489	8685	0.922	-0.08	12	-0.023	0.491	7919	0.958
AGTR2	-2.545	15	-0.657	0.256	4680	0.891	-0.773	15	-0.199	0.421	7811	0.882	3.133	10	0.991	0.839	12102	1.072
AGTRAP	-0.864	18	-0.204	0.419	6763	1.011	3.379	18	0.796	0.787	12484	1.032	4.594	12	1.326	0.908	13050	1.076
AGXT	1.921	18	0.453	0.675	10117	1.088	3.841	18	0.905	0.817	12863	1.04	-1.682	12	-0.486	0.314	5898	0.822
AGXT2	0.07	18	0.017	0.507	7893	1.047	0.205	18	0.048	0.519	9069	0.937	6.139	12	1.772	0.962	13983	1.064
AHCTF1	-1.606	9	-0.535	0.296	5192	0.931	-2.827	9	-0.942	0.173	4268	0.664	0.161	6	0.066	0.526	8334	0.976
AHCY	-3.723	12	-1.075	0.141	3069	0.751	12.365	12	3.569	1	16318	1.003	-1.338	8	-0.473	0.318	5966	0.825
AHCYL1	-0.244	16	-0.061	0.476	7481	1.037	1.793	18	0.423	0.664	10897	0.997	0.678	12	0.196	0.578	8902	1.003
AHCYL2	3.539	18	0.834	0.798	11895	1.094	-8.125	18	-1.915	0.028	1464	0.31	1.773	12	0.512	0.696	10274	1.047
AHDC1	-1.106	18	-0.261	0.397	6518	0.994	-3.61	18	-0.851	0.197	4639	0.697	2.181	12	0.63	0.736	10738	1.059
AHI1	-1.678	18	-0.396	0.346	5844	0.966	-5.343	18	-1.259	0.104	3120	0.545	-6.443	12	-1.86	0.031	1430	0.34
AHNAK	-1.034	15	-0.267	0.395	6489	0.992	-4.597	18	-1.084	0.139	3762	0.606	7.886	11	2.378	0.991	14764	1.038
AHNAK2	7.98	17	1.936	0.974	15102	1.051	-3.416	18	-0.805	0.21	4823	0.714	10.797	12	3.117	0.999	15203	1.016
AHR	2.535	18	0.598	0.725	10829	1.092	-3.518	18	-0.829	0.204	4733	0.704	2.906	12	0.839	0.799	11551	1.07
AHRR	1.255	18	0.296	0.616	9325	1.078	-1.571	17	-0.381	0.352	6844	0.841	7.01	12	2.024	0.979	14347	1.055
AHSA1	-8.439	18	-1.989	0.023	992	0.384	-2.849	18	-0.672	0.251	5439	0.755	-3.169	12	-0.915	0.18	4149	0.672
AHSG	4.838	18	1.14	0.873	13108	1.086	13.919	18	3.281	0.999	16275	1.005	4.563	12	1.317	0.906	13031	1.075
AICDA	-1.584	17	-0.384	0.35	5899	0.969	6.709	18	1.581	0.943	14792	1.044	1.614	12	0.466	0.679	10101	1.04
AIF1L	-4.876	18	-1.149	0.125	2825	0.723	3.664	18	0.864	0.806	12718	1.038	2.021	12	0.583	0.72	10547	1.056
AIFM1	8.31	18	1.959	0.975	15134	1.051	2.741	18	0.646	0.741	11894	1.02	-7.276	11	-2.194	0.014	876	0.249
AIFM2	-2.09	17	-0.507	0.306	5316	0.939	-12.104	18	-2.853	0.002	431	0.082	-3.196	10	-1.011	0.156	3802	0.635
AIFM3	-3.768	18	-0.888	0.187	3766	0.811	5.107	18	1.204	0.886	13846	1.047	1.676	12	0.484	0.686	10171	1.043
AIG1	-1.675	15	-0.432	0.333	5662	0.958	-2.389	15	-0.617	0.269	5710	0.77	3.543	9	1.181	0.881	12680	1.075
AIM1	8.453	18	1.992	0.977	15181	1.049	1.717	18	0.405	0.657	10802	0.996	1.179	12	0.34	0.633	9559	1.025
AIM1L	6.155	18	1.451	0.927	14041	1.076	-3.621	18	-0.854	0.197	4623	0.696	-5.541	11	-1.671	0.047	1806	0.406
AIM2	3.144	8	1.111	0.867	13001	1.087	5.285	9	1.762	0.961	15145	1.039	-1.139	6	-0.465	0.321	6015	0.825
AIMP1	3.428	12	0.99	0.839	12572	1.088	-7.142	12	-2.062	0.02	1231	0.261	-2.427	8	-0.858	0.195	4344	0.696
AIMP2	-1.246	12	-0.36	0.359	6013	0.975	-0.845	12	-0.244	0.404	7555	0.875	-2.194	8	-0.776	0.219	4681	0.724
AIP	6.304	18	1.486	0.931	14138	1.074	-5.725	18	-1.349	0.089	2825	0.513	6.742	12	1.946	0.974	14243	1.058
AIPL1	-7.969	17	-1.933	0.027	1081	0.402	3.614	18	0.852	0.803	12670	1.037	-0.338	11	-0.102	0.459	7578	0.938
AIRE	1.306	18	0.308	0.621	9393	1.078	4.407	18	1.039	0.851	13343	1.044	1.267	12	0.366	0.643	9672	1.028
AJAP1	-5.252	18	-1.238	0.108	2572	0.684	3.636	18	0.857	0.804	12693	1.037	5.761	10	1.822	0.966	14079	1.061
AJUBA	-1.908	18	-0.45	0.326	5556	0.958	10.206	18	2.406	0.992	15905	1.021	1.59	12	0.459	0.677	10067	1.04
AK1	-7.487	18	-1.765	0.039	1357	0.466	-9.401	18	-2.216	0.013	1014	0.216	-3.352	12	-0.968	0.167	3952	0.652
AK5	9.217	18	2.173	0.985	15429	1.041	-12.706	18	-2.995	0.001	353	0.064	3.664	12	1.058	0.855	12308	1.074
AK7	-1.106	18	-0.261	0.397	6519	0.994	0.367	18	0.086	0.534	9272	0.944	0.802	12	0.231	0.592	9077	1.008
AK8	-4.765	18	-1.123	0.131	2903	0.734	-13.262	18	-3.126	0.001	302	0.048	-0.485	12	-0.14	0.444	7402	0.929
AK9	5.453	17	1.322	0.907	13668	1.082	-3.812	18	-0.899	0.184	4453	0.678	-2.156	11	-0.65	0.258	5205	0.766
AKAP1	-0.194	18	-0.046	0.482	7555	1.04	1.715	18	0.404	0.657	10801	0.996	0.973	12	0.281	0.611	9302	1.015
AKAP10	3.547	18	0.836	0.798	11907	1.094	4.748	18	1.119	0.868	13594	1.046	-7.15	12	-2.064	0.02	1056	0.286
AKAP11	5.73	15	1.479	0.93	14122	1.075	-0.816	15	-0.211	0.417	7735	0.882	-7.216	10	-2.282	0.011	766	0.227
AKAP12	-6.925	15	-1.788	0.037	1304	0.461	0.707	15	0.182	0.572	9740	0.962	-7.003	10	-2.215	0.013	851	0.243
AKAP13	5.755	18	1.357	0.913	13791	1.079	15.658	18	3.691	1	16329	1.002	3.175	11	0.957	0.831	11990	1.072
AKAP2	8.208	18	1.935	0.973	15100	1.051	-1.253	18	-0.295	0.384	7303	0.861	3.618	12	1.044	0.852	12269	1.074
AKAP3	0.887	15	0.229	0.591	9001	1.07	-1.604	15	-0.414	0.339	6670	0.833	-4.301	10	-1.36	0.087	2631	0.511
AKAP4	8.106	18	1.911	0.972	15069	1.052	-0.308	18	-0.072	0.471	8484	0.909	3.342	12	0.965	0.833	12018	1.072
AKAP6	2.521	18	0.594	0.724	10813	1.092	-0.825	18	-0.194	0.423	7838	0.883	-4.332	12	-1.251	0.106	2951	0.553
AKAP7	-10.613	14	-2.836	0.002	280	0.133	-13.745	15	-3.549	0	184	0.017	5.233	10	1.655	0.951	13760	1.069
AKAP8	2.865	18	0.675	0.75	11196	1.093	5.529	18	1.303	0.904	14109	1.049	6.562	12	1.894	0.971	14168	1.06
AKAP8L	-3.049	18	-0.719	0.236	4411	0.873	-0.067	18	-0.016	0.494	8739	0.925	6.61	12	1.908	0.972	14182	1.06
AKAP9	2.951	18	0.696	0.757	11285	1.094	-2.073	18	-0.489	0.313	6298	0.813	4.157	12	1.2	0.885	12730	1.075
AKIP1	2.925	17	0.709	0.761	11346	1.094	3.552	18	0.837	0.799	12612	1.037	8.019	12	2.315	0.99	14687	1.042
AKIRIN2	-4.996	11	-1.506	0.066	1864	0.577	-0.344	12	-0.099	0.46	8330	0.905	5.347	7	2.021	0.978	14346	1.055
AKNA	4.169	18	0.983	0.837	12549	1.088	-15.092	18	-3.557	0	180	0.017	-0.785	11	-0.237	0.406	7003	0.898
AKNAD1	-3.905	18	-0.921	0.179	3645	0.799	3.505	18	0.826	0.796	12580	1.035	-10.249	11	-3.09	0.001	252	0.061
AKR1A1	-2.697	16	-0.674	0.25	4594	0.888	-10.175	18	-2.398	0.008	775	0.174	9.618	11	2.9	0.998	15122	1.021
AKR1B1	4.209	15	1.087	0.861	12904	1.089	-1.455	15	-0.376	0.354	6867	0.843	-0.296	10	-0.094	0.463	7609	0.941
AKR1CL1	1.997	12	0.577	0.718	10730	1.091	1.729	12	0.499	0.691	11246	1.006	-2.175	8	-0.769	0.221	4710	0.725
AKR1D1	9.283	18	2.188	0.986	15446	1.041	9.691	18	2.284	0.989	15790	1.025	4.645	12	1.341	0.91	13084	1.076
AKR1E2	4.114	18	0.97	0.834	12492	1.089	5.715	18	1.347	0.911	14243	1.047	-2.423	12	-0.7	0.242	4993	0.75
AKR7A2	-1.715	12	-0.495	0.31	5387	0.939	3.737	12	1.079	0.86	13474	1.044	13.425	8	4.746	1	15431	1.002
AKT1	0.022	18	0.005	0.502	7826	1.046	8.095	18	1.908	0.972	15358	1.036	0.268	12	0.077	0.531	8376	0.98
AKT1S1	-3.113	18	-0.734	0.232	4356	0.867	3.969	18	0.935	0.825	12974	1.041	3.67	12	1.059	0.855	12317	1.074
AKT2	1.073	18	0.253	0.6	9108	1.074	1.258	17	0.305	0.62	10329	0.982	5.187	12	1.498	0.933	13452	1.073
AKT3	-3.759	18	-0.886	0.188	3780	0.81	5.023	18	1.184	0.882	13787	1.047	-4.65	12	-1.342	0.09	2672	0.519
ALAD	5.508	18	1.298	0.903	13605	1.082	10.601	18	2.499	0.994	15971	1.019	1.181	12	0.341	0.633	9565	1.024
ALAS1	12.177	18	2.87	0.998	16017	1.016	8.506	17	2.063	0.98	15556	1.032	3.771	12	1.089	0.862	12416	1.074
ALAS2	5.491	18	1.294	0.902	13592	1.083	-0.54	18	-0.127	0.449	8185	0.899	-1.827	12	-0.527	0.299	5718	0.809
ALB	-12.995	18	-3.063	0.001	205	0.087	2.494	18	0.588	0.722	11653	1.014	-0.664	12	-0.192	0.424	7188	0.912
ALCAM	0.377	17	0.092	0.536	8265	1.059	9.217	18	2.172	0.985	15674	1.029	5.784	11	1.744	0.959	13925	1.066
ALDH16A1	-4.629	18	-1.091	0.138	3016	0.744	1.117	18	0.263	0.604	10121	0.977	8.521	12	2.46	0.993	14844	1.035
ALDH18A1	-7.612	18	-1.794	0.036	1291	0.46	11.23	18	2.647	0.996	16070	1.015	1.913	11	0.577	0.718	10529	1.055
ALDH1A1	9.922	18	2.339	0.99	15639	1.033	0.135	18	0.032	0.513	8989	0.934	-2.377	12	-0.686	0.246	5057	0.753
ALDH1A2	9.351	18	2.204	0.986	15466	1.04	-3.693	18	-0.87	0.192	4550	0.691	-2.348	12	-0.678	0.249	5101	0.755
ALDH1A3	7.312	18	1.723	0.958	14718	1.061	-4.511	18	-1.063	0.144	3837	0.614	-2.982	12	-0.861	0.195	4334	0.695
ALDH1B1	-3.331	15	-0.86	0.195	3877	0.82	-4.268	15	-1.102	0.135	3684	0.601	3.023	10	0.956	0.83	11987	1.072
ALDH1L1	-0.88	18	-0.207	0.418	6751	1.01	-8.762	18	-2.065	0.019	1223	0.26	5.245	12	1.514	0.935	13488	1.072
ALDH1L2	5.496	18	1.296	0.902	13594	1.083	-0.044	18	-0.01	0.496	8767	0.926	-0.698	12	-0.201	0.42	7152	0.909
ALDH2	5.464	18	1.288	0.901	13574	1.083	2.702	17	0.655	0.744	11937	1.02	4.481	12	1.294	0.902	12976	1.075
ALDH3A1	-6.072	17	-1.473	0.07	1959	0.586	-3.347	18	-0.789	0.215	4898	0.719	3.515	11	1.06	0.855	12318	1.074
ALDH3A2	7.817	18	1.843	0.967	14942	1.056	-4.719	18	-1.112	0.133	3645	0.597	-5.184	12	-1.496	0.067	2223	0.468
ALDH3B1	0.866	18	0.204	0.581	8868	1.068	-0.927	18	-0.219	0.413	7690	0.88	4.746	12	1.37	0.915	13156	1.075
ALDH3B2	0.645	9	0.215	0.585	8926	1.069	-4.231	9	-1.41	0.079	2626	0.494	-6.659	6	-2.719	0.003	437	0.116
ALDH4A1	-2.284	18	-0.538	0.295	5183	0.929	4.004	18	0.944	0.827	13003	1.042	4.597	12	1.327	0.908	13055	1.075
ALDH5A1	-7.58	18	-1.787	0.037	1309	0.461	-3.939	18	-0.928	0.177	4330	0.668	-2.405	12	-0.694	0.244	5023	0.751
ALDH6A1	3.481	18	0.82	0.794	11846	1.093	2.44	18	0.575	0.717	11594	1.013	5.197	12	1.5	0.933	13458	1.073
ALDH7A1	4.373	17	1.061	0.856	12815	1.089	-0.661	18	-0.156	0.438	8022	0.894	11.047	10	3.493	1	15301	1.011
ALDH8A1	7.41	18	1.746	0.96	14751	1.061	6.271	18	1.478	0.93	14567	1.045	-1.424	12	-0.411	0.34	6252	0.842
ALDH9A1	-0.943	18	-0.222	0.412	6694	1.004	0.128	18	0.03	0.512	8981	0.933	0.505	12	0.146	0.558	8686	0.994
ALDOA	-6.108	8	-2.159	0.015	774	0.325	-4.569	10	-1.445	0.074	2525	0.481	-1.512	6	-0.617	0.269	5322	0.78
ALDOB	-0.455	18	-0.107	0.457	7232	1.031	-3.521	18	-0.83	0.203	4725	0.704	-3.848	12	-1.111	0.133	3401	0.606
ALDOC	1.795	18	0.423	0.664	9965	1.087	5.383	18	1.269	0.898	14032	1.047	-4.731	12	-1.366	0.086	2616	0.508
ALG1	-5.514	12	-1.592	0.056	1706	0.533	8.888	14	2.375	0.991	15883	1.022	-5.41	8	-1.913	0.028	1336	0.323
ALG12	-8.559	18	-2.017	0.022	951	0.374	-1.22	18	-0.288	0.387	7344	0.862	4.935	12	1.425	0.923	13285	1.074
ALG13	-5.476	17	-1.328	0.092	2308	0.651	4.866	17	1.18	0.881	13774	1.047	3.518	10	1.112	0.867	12479	1.075
ALG14	2.004	13	0.556	0.711	10628	1.091	-4.174	15	-1.078	0.141	3777	0.609	-9.17	8	-3.242	0.001	206	0.045
ALG2	1.327	7	0.502	0.692	10374	1.088	-2.947	9	-0.982	0.163	4135	0.645	4.576	7	1.73	0.958	13895	1.067
ALG3	9.132	18	2.152	0.984	15406	1.042	1.272	18	0.3	0.618	10307	0.981	3.563	12	1.029	0.848	12217	1.074
ALG5	1.576	18	0.371	0.645	9676	1.087	-4.453	15	-1.15	0.125	3495	0.586	-1.323	12	-0.382	0.351	6380	0.852
ALG6	14.777	18	3.483	1	16209	1.006	3.622	18	0.854	0.803	12675	1.038	-7.393	10	-2.338	0.01	716	0.21
ALG8	-3.338	14	-0.892	0.186	3745	0.811	-2.068	15	-0.534	0.297	6081	0.799	3.688	10	1.166	0.878	12642	1.075
ALG9	2.442	18	0.576	0.718	10721	1.092	2.574	18	0.607	0.728	11729	1.016	-0.874	12	-0.252	0.4	6938	0.893
ALK	-0.264	18	-0.062	0.475	7471	1.037	-3.126	18	-0.737	0.231	5158	0.732	-1.753	12	-0.506	0.306	5808	0.816
ALKBH1	2.275	18	0.536	0.704	10517	1.092	-1.561	18	-0.368	0.357	6910	0.845	-0.407	10	-0.129	0.449	7450	0.932
ALKBH2	-4.879	12	-1.408	0.08	2104	0.616	-9.544	12	-2.755	0.003	490	0.098	-4.218	7	-1.594	0.055	1979	0.433
ALKBH3	1.162	18	0.274	0.608	9199	1.078	2.006	17	0.486	0.687	11189	1.005	-10.392	12	-3	0.001	283	0.074
ALKBH4	1.452	18	0.342	0.634	9550	1.083	-2.185	18	-0.515	0.303	6157	0.806	-7.552	12	-2.18	0.015	891	0.254
ALKBH5	8.865	18	2.089	0.982	15328	1.045	-6.769	18	-1.595	0.055	2127	0.426	0.957	11	0.289	0.614	9342	1.016
ALKBH6	-7.046	18	-1.661	0.048	1551	0.509	-2.404	18	-0.567	0.285	5926	0.789	4.97	12	1.435	0.924	13307	1.074
ALKBH7	-8.739	18	-2.06	0.02	895	0.359	2.013	18	0.474	0.682	11130	1.004	-2.386	12	-0.689	0.245	5047	0.752
ALKBH8	-4.549	18	-1.072	0.142	3083	0.75	5.54	18	1.306	0.904	14123	1.048	13.536	12	3.907	1	15376	1.006
ALLC	1.708	18	0.403	0.656	9866	1.085	-3.189	18	-0.752	0.226	5082	0.728	0.698	12	0.202	0.58	8934	1.004
ALMS1	9.484	18	2.235	0.987	15504	1.039	-0.297	18	-0.07	0.472	8498	0.909	-7.758	12	-2.24	0.013	823	0.236
ALOX12	-2.415	16	-0.604	0.273	4909	0.907	3.822	18	0.901	0.816	12852	1.04	-2.102	10	-0.665	0.253	5146	0.761
ALOX12B	2.252	18	0.531	0.702	10500	1.091	1.027	18	0.242	0.596	10021	0.973	-6.679	12	-1.928	0.027	1302	0.32
ALOX15	-3.907	18	-0.921	0.179	3641	0.8	-5.241	18	-1.235	0.108	3187	0.557	-1.699	12	-0.49	0.312	5879	0.821
ALOX15B	-1.893	18	-0.446	0.328	5578	0.958	-7.501	18	-1.768	0.039	1763	0.358	5.608	12	1.619	0.947	13686	1.071
ALOX5	-0.872	18	-0.205	0.419	6758	1.01	-4.676	18	-1.102	0.135	3682	0.601	-5.372	12	-1.551	0.06	2066	0.453
ALOX5AP	5.567	18	1.312	0.905	13642	1.082	2.636	18	0.621	0.733	11793	1.017	0.651	12	0.188	0.575	8869	1.002
ALOXE3	9.693	16	2.423	0.992	15714	1.03	1.957	17	0.475	0.682	11133	1.003	5.593	11	1.686	0.954	13825	1.067
ALPI	1.965	12	0.567	0.715	10689	1.091	2.704	12	0.781	0.782	12432	1.03	2.047	8	0.724	0.765	11132	1.063
ALPK1	2.246	17	0.545	0.707	10567	1.091	0.152	18	0.036	0.514	9009	0.935	0.15	11	0.045	0.518	8223	0.974
ALPK2	2.509	18	0.591	0.723	10799	1.092	-1.639	18	-0.386	0.35	6814	0.84	1.744	12	0.504	0.693	10249	1.045
ALPK3	2.361	18	0.556	0.711	10632	1.091	3.694	18	0.871	0.808	12737	1.038	5.783	10	1.829	0.966	14088	1.061
ALPL	-4.201	18	-0.99	0.161	3359	0.782	0.897	18	0.211	0.584	9876	0.968	-6.742	12	-1.946	0.026	1261	0.317
ALS2	-2.291	18	-0.54	0.295	5172	0.929	-5.527	18	-1.303	0.096	2971	0.531	-3.532	12	-1.02	0.154	3761	0.633
ALS2CL	0.732	18	0.173	0.568	8689	1.067	-4.11	18	-0.969	0.166	4187	0.65	6.063	12	1.75	0.96	13937	1.065
ALS2CR11	-2.538	18	-0.598	0.275	4939	0.908	-0.268	18	-0.063	0.475	8531	0.911	0.398	12	0.115	0.546	8552	0.987
ALS2CR12	-5.022	18	-1.184	0.118	2710	0.712	0.056	18	0.013	0.505	8888	0.931	-1.922	12	-0.555	0.29	5607	0.799
ALX1	4.233	18	0.998	0.841	12598	1.089	1.82	18	0.429	0.666	10925	0.998	5.823	12	1.681	0.954	13813	1.068
ALX3	-0.237	18	-0.056	0.478	7508	1.038	5.9	18	1.391	0.918	14373	1.045	8.186	12	2.363	0.991	14743	1.04
ALX4	0.329	18	0.078	0.531	8200	1.056	-0.444	18	-0.105	0.458	8303	0.904	0.514	12	0.148	0.559	8698	0.994
ALYREF	-0.978	17	-0.237	0.406	6627	1	-5.14	18	-1.212	0.113	3272	0.564	1.794	12	0.518	0.698	10303	1.047
AMACR	0.102	12	0.03	0.512	7958	1.049	2.235	12	0.645	0.741	11892	1.019	2.879	8	1.018	0.846	12191	1.073
AMBN	-0.216	15	-0.056	0.478	7509	1.038	-7.094	15	-1.832	0.033	1632	0.336	-12.005	10	-3.796	0	84	0.014
AMBP	-8.879	18	-2.093	0.018	851	0.348	0.376	18	0.089	0.535	9284	0.944	0.433	10	0.137	0.554	8646	0.992
AMBRA1	-2.176	18	-0.513	0.304	5288	0.938	-15.878	18	-3.742	0	145	0.01	-6.886	12	-1.988	0.023	1186	0.305
AMDHD1	-5.388	15	-1.391	0.082	2148	0.623	-1.532	15	-0.396	0.346	6761	0.838	-4.442	10	-1.405	0.08	2497	0.496
AMDHD2	0.801	18	0.189	0.575	8788	1.067	-0.338	18	-0.08	0.468	8445	0.908	4.714	12	1.361	0.913	13137	1.075
AMER1	7.182	15	1.854	0.968	14975	1.054	4.004	15	1.034	0.849	13316	1.044	-4.924	10	-1.557	0.06	2049	0.451
AMER2	3.598	18	0.848	0.802	11963	1.093	-0.606	18	-0.143	0.443	8088	0.897	2.086	12	0.602	0.727	10611	1.059
AMER3	-8.26	18	-1.947	0.026	1066	0.394	-3.619	18	-0.853	0.197	4627	0.696	6.039	12	1.743	0.959	13923	1.066
AMFR	-1.565	18	-0.369	0.356	5970	0.973	-3.583	18	-0.844	0.199	4668	0.699	2.529	12	0.73	0.767	11155	1.064
AMH	0.712	18	0.168	0.567	8663	1.067	1.802	18	0.425	0.664	10904	0.998	0.337	12	0.097	0.539	8481	0.983
AMHR2	-1.257	16	-0.314	0.377	6252	0.983	0.867	18	0.204	0.581	9851	0.965	-9.394	12	-2.712	0.003	441	0.117
AMICA1	0.404	18	0.095	0.538	8281	1.06	-1.236	18	-0.291	0.385	7320	0.862	1.495	12	0.432	0.667	9954	1.036
AMIGO1	-2.484	12	-0.717	0.237	4417	0.874	4.092	12	1.181	0.881	13779	1.047	3.212	8	1.136	0.872	12550	1.075
AMIGO2	5.596	15	1.445	0.926	14025	1.077	-3.546	15	-0.916	0.18	4377	0.673	-3.9	10	-1.233	0.109	3001	0.56
AMIGO3	3.559	18	0.839	0.799	11920	1.094	-4.626	18	-1.09	0.138	3731	0.605	4.88	12	1.409	0.921	13242	1.075
AMMECR1	-3.589	18	-0.846	0.199	3920	0.827	-5.69	18	-1.341	0.09	2847	0.517	1.058	12	0.305	0.62	9410	1.019
AMMECR1L	8.366	15	2.16	0.985	15417	1.042	0.073	15	0.019	0.508	8918	0.932	0.832	10	0.263	0.604	9227	1.012
AMN	-5.004	18	-1.18	0.119	2725	0.713	3.285	18	0.774	0.781	12412	1.03	17.896	12	5.166	1	15453	1.001
AMOT	-6.215	15	-1.605	0.054	1677	0.528	-0.38	15	-0.098	0.461	8338	0.905	-1.916	10	-0.606	0.272	5374	0.784
AMOTL1	1.864	17	0.452	0.674	10112	1.088	-7.418	18	-1.748	0.04	1802	0.365	0.143	10	0.045	0.518	8226	0.974
AMOTL2	0.99	18	0.233	0.592	9022	1.071	-5.998	18	-1.414	0.079	2619	0.492	4.453	12	1.285	0.901	12959	1.075
AMPD1	3.793	18	0.894	0.814	12172	1.091	0.748	18	0.176	0.57	9706	0.961	-4.827	12	-1.393	0.082	2528	0.5
AMPD2	-0.682	16	-0.171	0.432	6920	1.019	-6	18	-1.414	0.079	2617	0.492	1.7	12	0.491	0.688	10201	1.043
AMPD3	4.138	18	0.975	0.835	12521	1.088	-1.633	18	-0.385	0.35	6825	0.84	2.109	12	0.609	0.729	10641	1.059
AMPH	-7.419	17	-1.799	0.036	1282	0.458	-11.782	18	-2.777	0.003	474	0.095	7.066	12	2.04	0.979	14377	1.054
AMT	-2.959	17	-0.718	0.236	4415	0.874	4.711	18	1.11	0.867	13564	1.046	9.105	12	2.628	0.996	14967	1.029
AMTN	-7.104	17	-1.723	0.042	1428	0.485	-9.477	18	-2.234	0.013	990	0.211	1.574	12	0.454	0.675	10048	1.039
AMZ1	4.657	18	1.098	0.864	12953	1.088	4.478	18	1.055	0.854	13396	1.044	-4.778	12	-1.379	0.084	2567	0.506
ANAPC11	-4.848	16	-1.212	0.113	2632	0.699	0.245	16	0.061	0.524	9132	0.94	-2.438	11	-0.735	0.231	4849	0.737
ANAPC15	-6.308	18	-1.487	0.069	1919	0.582	-9.11	17	-2.21	0.014	1023	0.217	-5.937	12	-1.714	0.043	1718	0.39
ANAPC2	-11.169	13	-3.098	0.001	194	0.082	-11.325	14	-3.027	0.001	341	0.059	-3.413	6	-1.393	0.082	2527	0.5
ANAPC4	-0.92	10	-0.291	0.386	6360	0.989	-4.915	14	-1.314	0.094	2932	0.528	-5.982	10	-1.892	0.029	1378	0.329
ANAPC5	-6.025	11	-1.816	0.035	1243	0.455	-10.387	14	-2.776	0.003	475	0.095	0.596	9	0.199	0.579	8917	1.004
ANAPC7	-4.574	17	-1.109	0.134	2957	0.737	-5.493	18	-1.295	0.098	3003	0.533	-2.904	11	-0.876	0.191	4277	0.689
ANG	2.439	9	0.813	0.792	11809	1.094	-0.445	9	-0.148	0.441	8059	0.896	8.383	6	3.422	1	15288	1.011
ANGEL1	-1.331	18	-0.314	0.377	6256	0.983	-11.448	18	-2.698	0.003	518	0.11	2.806	12	0.81	0.791	11447	1.069
ANGEL2	-5.866	18	-1.383	0.083	2164	0.629	-1.81	18	-0.427	0.335	6606	0.83	4.438	12	1.281	0.9	12943	1.075
ANGPT1	-1.355	12	-0.391	0.348	5863	0.968	0.907	12	0.262	0.603	10111	0.977	-3.698	8	-1.308	0.096	2768	0.534
ANGPT2	0.962	14	0.257	0.601	9132	1.074	2.644	15	0.683	0.753	12048	1.023	-5.749	10	-1.818	0.035	1499	0.356
ANGPT4	-7.724	18	-1.821	0.034	1229	0.456	2.714	18	0.64	0.739	11873	1.019	3.943	12	1.138	0.873	12562	1.074
ANGPTL1	0.07	18	0.016	0.507	7891	1.047	1.46	18	0.344	0.635	10523	0.987	-1.46	12	-0.421	0.337	6198	0.84
ANGPTL2	9.47	17	2.297	0.989	15593	1.035	1.079	18	0.254	0.6	10075	0.975	2.836	12	0.819	0.793	11478	1.069
ANGPTL3	-8.589	18	-2.024	0.021	948	0.369	-4.087	18	-0.963	0.168	4201	0.653	0.717	11	0.216	0.586	9000	1.006
ANGPTL4	-4.011	18	-0.945	0.172	3537	0.794	-8.313	18	-1.959	0.025	1390	0.295	0.839	12	0.242	0.596	9138	1.008
ANGPTL6	11.502	18	2.711	0.997	15914	1.021	0.066	18	0.016	0.506	8903	0.931	-7.919	12	-2.286	0.011	757	0.227
ANGPTL7	1.165	18	0.275	0.608	9205	1.078	9.462	18	2.23	0.987	15738	1.027	3.373	12	0.974	0.835	12050	1.072
ANHX	-8.649	17	-2.098	0.018	840	0.349	4.34	18	1.023	0.847	13274	1.044	-0.476	11	-0.144	0.443	7385	0.928
ANK1	2.068	15	0.534	0.703	10513	1.091	2.683	14	0.717	0.763	12175	1.026	0.772	10	0.244	0.596	9149	1.008
ANK2	4.359	18	1.027	0.848	12685	1.09	2.263	18	0.533	0.703	11405	1.009	7.12	12	2.055	0.98	14404	1.052
ANK3	6.151	18	1.45	0.926	14038	1.076	-1.401	18	-0.33	0.371	7108	0.854	3.181	12	0.918	0.821	11847	1.072
ANKAR	-1.837	18	-0.433	0.332	5657	0.959	-0.128	17	-0.031	0.488	8674	0.92	-1.682	11	-0.507	0.306	5802	0.816
ANKDD1A	-0.87	17	-0.211	0.416	6733	1.009	5.578	18	1.315	0.906	14152	1.048	-3.534	12	-1.02	0.154	3756	0.633
ANKDD1B	5.614	18	1.323	0.907	13675	1.082	-5.153	18	-1.215	0.112	3260	0.564	2.528	12	0.73	0.767	11152	1.064
ANKEF1	-1.789	18	-0.422	0.337	5717	0.96	2.062	18	0.486	0.687	11187	1.005	-2.887	12	-0.833	0.202	4449	0.703
ANKFN1	-4.527	18	-1.067	0.143	3101	0.752	-3.515	18	-0.828	0.204	4734	0.704	-1.541	12	-0.445	0.328	6095	0.833
ANKFY1	2.41	17	0.584	0.721	10770	1.091	-3.883	18	-0.915	0.18	4379	0.673	2.939	12	0.848	0.802	11586	1.071
ANKH	13.703	15	3.538	1	16215	1.006	-3.894	15	-1.005	0.157	4046	0.637	-5.522	10	-1.746	0.04	1646	0.38
ANKHD1	2.63	18	0.62	0.732	10937	1.092	4.477	17	1.086	0.861	13489	1.045	4.539	11	1.368	0.914	13154	1.075
ANKIB1	4.664	16	1.166	0.878	13216	1.084	7.658	18	1.805	0.964	15217	1.038	-6.717	12	-1.939	0.026	1273	0.319
ANKK1	-1.613	15	-0.416	0.339	5749	0.961	-1.862	15	-0.481	0.315	6333	0.815	4.296	10	1.358	0.913	13132	1.075
ANKLE1	8.946	18	2.109	0.983	15347	1.044	-5.184	18	-1.222	0.111	3236	0.561	4.158	12	1.2	0.885	12732	1.075
ANKLE2	-1.241	16	-0.31	0.378	6276	0.983	1.297	14	0.347	0.636	10529	0.988	1.91	9	0.637	0.738	10773	1.059
ANKMY1	-10.613	18	-2.502	0.006	467	0.216	1.823	18	0.43	0.666	10933	0.998	3.206	12	0.926	0.823	11877	1.071
ANKMY2	-7.297	18	-1.72	0.043	1438	0.485	8.335	18	1.965	0.975	15435	1.034	1.527	12	0.441	0.67	9989	1.038
ANKRA2	6.036	18	1.423	0.923	13970	1.077	-5.041	18	-1.188	0.117	3363	0.571	-6.479	12	-1.87	0.031	1415	0.336
ANKRD1	6.572	18	1.549	0.939	14315	1.07	-0.022	18	-0.005	0.498	8806	0.926	5.322	11	1.605	0.946	13669	1.07
ANKRD10	5.98	18	1.409	0.921	13932	1.078	1.354	18	0.319	0.625	10400	0.984	-5.918	10	-1.872	0.031	1413	0.335
ANKRD11	3.897	18	0.919	0.821	12266	1.091	-5.283	18	-1.245	0.107	3159	0.552	-2.384	11	-0.719	0.236	4921	0.742
ANKRD12	-0.811	18	-0.191	0.424	6822	1.014	-3.236	18	-0.763	0.223	5027	0.726	5.238	12	1.512	0.935	13479	1.073
ANKRD13A	-0.082	18	-0.019	0.492	7687	1.045	-4.282	18	-1.009	0.156	4029	0.635	1.88	11	0.567	0.715	10486	1.054
ANKRD13B	-3.703	17	-0.898	0.185	3721	0.809	-1.95	15	-0.503	0.307	6216	0.809	6.311	10	1.996	0.977	14313	1.056
ANKRD13C	5.512	18	1.299	0.903	13606	1.083	4.052	18	0.955	0.83	13047	1.042	7.891	12	2.278	0.989	14655	1.043
ANKRD13D	-1.506	18	-0.355	0.361	6046	0.975	-4.769	18	-1.124	0.13	3593	0.594	-1.282	12	-0.37	0.356	6432	0.855
ANKRD16	-11.213	17	-2.719	0.003	334	0.16	0.212	17	0.052	0.521	9086	0.938	-2.462	11	-0.742	0.229	4819	0.735
ANKRD17	-7.522	18	-1.773	0.038	1332	0.467	2.218	18	0.523	0.699	11363	1.008	-6.126	10	-1.937	0.026	1277	0.319
ANKRD18A	2.218	9	0.739	0.77	11474	1.095	0.327	9	0.109	0.543	9371	0.949	1.138	6	0.464	0.679	10097	1.04
ANKRD2	7.771	17	1.885	0.97	15026	1.053	5.976	17	1.449	0.926	14509	1.045	-8.862	12	-2.558	0.005	546	0.149
ANKRD22	-0.742	15	-0.192	0.424	6820	1.014	3.597	15	0.929	0.824	12946	1.041	1.168	10	0.369	0.644	9690	1.028
ANKRD23	-14.369	15	-3.71	0	92	0.018	5.15	18	1.214	0.888	13885	1.046	-8.895	12	-2.568	0.005	535	0.148
ANKRD24	-2.685	18	-0.633	0.263	4779	0.899	2.158	17	0.523	0.7	11367	1.008	1.321	12	0.381	0.649	9751	1.029
ANKRD26	3.238	18	0.763	0.777	11581	1.095	1.499	18	0.353	0.638	10557	0.989	7.48	12	2.159	0.985	14525	1.048
ANKRD27	1.585	18	0.374	0.646	9692	1.087	-7.844	17	-1.902	0.029	1488	0.314	-6.733	12	-1.944	0.026	1265	0.317
ANKRD28	0.863	18	0.203	0.581	8863	1.068	-7.676	18	-1.809	0.035	1681	0.343	-5.901	12	-1.704	0.044	1744	0.392
ANKRD29	3.584	16	0.896	0.815	12184	1.091	12.87	18	3.034	0.999	16219	1.008	0.003	12	0.001	0.5	8021	0.965
ANKRD30B	-0.751	9	-0.25	0.401	6572	0.996	2.435	9	0.812	0.792	12538	1.033	-3.422	6	-1.397	0.081	2520	0.499
ANKRD31	3.848	18	0.907	0.818	12227	1.091	1.272	18	0.3	0.618	10305	0.981	2.765	12	0.798	0.788	11406	1.068
ANKRD32	-3.391	17	-0.823	0.205	3997	0.838	-11.242	18	-2.65	0.004	564	0.117	7.567	12	2.184	0.986	14543	1.048
ANKRD33	-1.801	17	-0.437	0.331	5629	0.959	3.905	18	0.92	0.821	12920	1.041	1.229	11	0.371	0.645	9695	1.028
ANKRD33B	-1.091	17	-0.265	0.396	6499	0.993	-7.649	18	-1.803	0.036	1692	0.345	17.121	12	4.942	1	15442	1.002
ANKRD34A	-4.236	18	-0.998	0.159	3338	0.777	-8.189	18	-1.93	0.027	1438	0.305	-0.009	12	-0.003	0.499	8004	0.964
ANKRD34B	4.368	15	1.128	0.87	13072	1.086	-0.033	15	-0.008	0.497	8781	0.926	-1.333	10	-0.421	0.337	6197	0.84
ANKRD34C	1.972	18	0.465	0.679	10179	1.088	-1.352	18	-0.319	0.375	7165	0.857	-0.157	12	-0.045	0.482	7818	0.954
ANKRD35	-1.837	18	-0.433	0.332	5655	0.959	-3.759	18	-0.886	0.188	4494	0.684	-1.988	12	-0.574	0.283	5518	0.793
ANKRD36C	-1.507	9	-0.502	0.308	5341	0.94	-5.298	9	-1.766	0.039	1767	0.358	-4.386	6	-1.791	0.037	1545	0.367
ANKRD37	3.098	15	0.8	0.788	11739	1.095	-0.578	15	-0.149	0.441	8058	0.895	-1.237	9	-0.412	0.34	6244	0.842
ANKRD39	6.491	18	1.53	0.937	14262	1.072	-0.606	18	-0.143	0.443	8087	0.897	3.872	12	1.118	0.868	12501	1.074
ANKRD40	-5.628	18	-1.326	0.092	2311	0.652	-5.825	18	-1.373	0.085	2756	0.504	5.801	12	1.675	0.953	13801	1.068
ANKRD42	3.885	17	0.942	0.827	12358	1.091	-7.628	17	-1.85	0.032	1590	0.331	1.266	12	0.366	0.643	9668	1.028
ANKRD44	6.209	18	1.463	0.928	14078	1.076	-0.264	18	-0.062	0.475	8536	0.911	0.729	11	0.22	0.587	9022	1.006
ANKRD45	-0.317	9	-0.106	0.458	7239	1.032	-4.643	9	-1.548	0.061	2249	0.443	-0.645	6	-0.263	0.396	6885	0.89
ANKRD46	3.42	18	0.806	0.79	11769	1.095	-2.765	18	-0.652	0.257	5534	0.761	0.36	12	0.104	0.541	8507	0.984
ANKRD50	5.569	15	1.438	0.925	14003	1.077	-5.465	15	-1.411	0.079	2625	0.493	-4.218	10	-1.334	0.091	2703	0.522
ANKRD52	6.212	18	1.464	0.928	14082	1.075	-14.532	18	-3.425	0	213	0.024	-6.616	9	-2.205	0.014	864	0.245
ANKRD53	-0.59	16	-0.147	0.441	7025	1.025	-4.496	18	-1.06	0.145	3852	0.615	-6.252	12	-1.805	0.036	1522	0.361
ANKRD54	1.737	16	0.434	0.668	10010	1.088	1.4	17	0.34	0.633	10503	0.986	-7.391	12	-2.133	0.016	958	0.265
ANKRD55	-3.944	17	-0.956	0.169	3488	0.792	6.101	18	1.438	0.925	14488	1.045	3.552	12	1.025	0.847	12206	1.074
ANKRD6	-2.287	18	-0.539	0.295	5178	0.929	-1.557	18	-0.367	0.357	6914	0.845	-4.261	12	-1.23	0.109	3012	0.561
ANKRD60	-1.346	18	-0.317	0.375	6236	0.982	6.622	18	1.561	0.941	14753	1.044	-0.544	12	-0.157	0.438	7326	0.924
ANKRD61	-2.492	15	-0.643	0.26	4727	0.897	-3.062	15	-0.79	0.215	4888	0.719	3.683	10	1.165	0.878	12637	1.075
ANKRD62	5.187	12	1.497	0.933	14168	1.074	-4.792	12	-1.383	0.083	2718	0.502	-4.958	8	-1.753	0.04	1630	0.378
ANKRD63	5.331	17	1.293	0.902	13588	1.083	-8.683	18	-2.047	0.02	1257	0.265	1.19	11	0.359	0.64	9637	1.027
ANKRD65	4.092	18	0.964	0.833	12464	1.09	-5.511	18	-1.299	0.097	2986	0.532	4.315	12	1.246	0.894	12853	1.075
ANKRD66	-1.196	18	-0.282	0.389	6407	0.99	0.109	18	0.026	0.51	8959	0.932	-4.538	12	-1.31	0.095	2764	0.532
ANKRD9	-6.549	15	-1.691	0.045	1493	0.496	-11.838	15	-3.057	0.001	330	0.056	-4.571	10	-1.446	0.074	2373	0.483
ANKS1A	3.166	18	0.746	0.772	11498	1.095	6.548	18	1.543	0.939	14721	1.044	-4.621	12	-1.334	0.091	2701	0.522
ANKS1B	2.338	18	0.551	0.709	10604	1.091	4.576	18	1.079	0.86	13473	1.044	-1.49	11	-0.449	0.327	6074	0.832
ANKS3	0.927	18	0.218	0.586	8944	1.069	8.367	17	2.029	0.979	15517	1.033	4.429	12	1.279	0.899	12936	1.075
ANKS4B	-1.605	12	-0.463	0.322	5502	0.953	1.939	12	0.56	0.712	11519	1.012	3.5	8	1.237	0.892	12835	1.075
ANKS6	-5.227	18	-1.232	0.109	2584	0.688	5.84	18	1.376	0.916	14334	1.046	-1.226	12	-0.354	0.362	6503	0.86
ANKUB1	-1.209	12	-0.349	0.364	6076	0.976	-7.887	12	-2.277	0.011	930	0.201	-2.381	8	-0.842	0.2	4421	0.7
ANKZF1	-0.166	18	-0.039	0.484	7585	1.042	-1.326	18	-0.313	0.377	7193	0.859	-7.461	12	-2.154	0.016	931	0.26
ANLN	2.385	16	0.596	0.724	10821	1.092	6.188	18	1.458	0.928	14526	1.045	4.505	12	1.3	0.903	12996	1.075
ANO1	4.209	16	1.052	0.854	12782	1.089	8.787	18	2.071	0.981	15566	1.031	-0.137	12	-0.04	0.484	7846	0.955
ANO10	3.361	18	0.792	0.786	11698	1.096	0.925	18	0.218	0.586	9903	0.969	-4.413	12	-1.274	0.101	2880	0.544
ANO2	-8.389	18	-1.977	0.024	1011	0.387	-1.326	18	-0.313	0.377	7195	0.858	17.029	12	4.916	1	15438	1.002
ANO3	0.269	18	0.064	0.525	8127	1.054	5.465	18	1.288	0.901	14070	1.048	-1.824	12	-0.526	0.299	5720	0.809
ANO4	-1.091	18	-0.257	0.399	6536	0.994	-6.513	17	-1.58	0.057	2172	0.43	-0.445	12	-0.128	0.449	7453	0.932
ANO5	4.404	17	1.068	0.857	12836	1.089	2.344	18	0.553	0.71	11491	1.011	0.567	12	0.164	0.565	8762	0.997
ANO6	0.845	18	0.199	0.579	8840	1.068	-2.744	18	-0.647	0.259	5564	0.762	-7.755	12	-2.239	0.013	824	0.236
ANO7	-1.912	18	-0.451	0.326	5552	0.958	3.577	18	0.843	0.8	12642	1.036	3.047	12	0.879	0.81	11704	1.071
ANO8	0.713	18	0.168	0.567	8665	1.067	2.013	18	0.474	0.682	11131	1.004	2.49	12	0.719	0.764	11109	1.064
ANO9	-5.517	18	-1.3	0.097	2384	0.662	4.667	18	1.1	0.864	13531	1.046	0.057	11	0.017	0.507	8097	0.968
ANP32A	3.817	9	1.272	0.898	13530	1.083	-1.924	9	-0.641	0.261	5592	0.763	-4.28	6	-1.747	0.04	1641	0.38
ANP32E	-1.542	17	-0.374	0.354	5946	0.972	0.488	18	0.115	0.546	9400	0.95	10.052	11	3.031	0.999	15171	1.018
ANPEP	0.421	17	0.102	0.541	8318	1.06	5.408	18	1.275	0.899	14047	1.047	1.094	12	0.316	0.624	9448	1.021
ANTXR1	4.534	17	1.1	0.864	12961	1.088	4.596	18	1.083	0.861	13483	1.045	-4.985	11	-1.503	0.066	2201	0.467
ANTXR2	3.949	18	0.931	0.824	12318	1.091	0.569	18	0.134	0.553	9497	0.954	1.973	12	0.57	0.716	10497	1.054
ANTXRL	-0.137	17	-0.033	0.487	7611	1.043	4.423	18	1.043	0.851	13356	1.044	0.28	12	0.081	0.532	8400	0.98
ANXA1	4.837	18	1.14	0.873	13106	1.086	-0.102	18	-0.024	0.49	8702	0.922	1.8	12	0.52	0.698	10311	1.047
ANXA10	2.711	15	0.7	0.758	11308	1.093	-0.818	15	-0.211	0.416	7730	0.882	3.475	10	1.099	0.864	12444	1.074
ANXA11	8.181	18	1.928	0.973	15085	1.052	-1.031	18	-0.243	0.404	7556	0.875	-0.726	11	-0.219	0.413	7079	0.903
ANXA13	-0.248	18	-0.058	0.477	7495	1.037	0.166	18	0.039	0.516	9026	0.935	-5.855	12	-1.69	0.045	1772	0.397
ANXA2R	-3.324	12	-0.959	0.169	3466	0.794	0.015	12	0.004	0.502	8857	0.927	2.33	8	0.824	0.795	11497	1.07
ANXA3	0.781	12	0.226	0.589	8978	1.07	-2.731	12	-0.788	0.215	4903	0.719	1.251	8	0.442	0.671	9996	1.038
ANXA4	4.7	18	1.108	0.866	12990	1.087	3.813	18	0.899	0.816	12841	1.04	2.745	12	0.792	0.786	11377	1.068
ANXA5	3.577	15	0.923	0.822	12288	1.091	-3.353	15	-0.866	0.193	4566	0.693	-4.064	10	-1.285	0.099	2839	0.541
ANXA6	4.162	18	0.981	0.837	12541	1.088	-4.899	18	-1.155	0.124	3481	0.584	3.72	12	1.074	0.859	12366	1.074
ANXA7	5.83	17	1.414	0.921	13942	1.078	5.44	18	1.282	0.9	14062	1.048	12.33	12	3.559	1	15313	1.01
ANXA9	2.44	17	0.592	0.723	10804	1.091	1.095	18	0.258	0.602	10090	0.976	2.221	12	0.641	0.739	10794	1.059
AOAH	-2.165	18	-0.51	0.305	5302	0.938	11.191	18	2.638	0.996	16063	1.015	-2.948	12	-0.851	0.197	4382	0.697
AOC2	0.41	15	0.106	0.542	8331	1.061	-1.895	15	-0.489	0.312	6291	0.813	-4.089	10	-1.293	0.098	2820	0.538
AOC3	4.255	9	1.418	0.922	13957	1.077	0.384	9	0.128	0.551	9475	0.952	1.2	6	0.49	0.688	10195	1.044
AOX1	7.268	18	1.713	0.957	14693	1.062	-0.736	18	-0.173	0.431	7942	0.889	-0.477	12	-0.138	0.445	7412	0.929
AP1AR	4.881	12	1.409	0.921	13927	1.078	1.093	12	0.315	0.624	10383	0.983	4.233	8	1.497	0.933	13451	1.073
AP1B1	-2.639	18	-0.622	0.267	4834	0.901	-1.999	18	-0.471	0.319	6393	0.816	6.652	12	1.92	0.973	14210	1.059
AP1G1	-6.582	18	-1.551	0.06	1782	0.553	1.173	18	0.276	0.609	10185	0.979	-3.1	12	-0.895	0.185	4201	0.683
AP1G2	0.837	18	0.197	0.578	8827	1.068	-3.329	18	-0.785	0.216	4921	0.72	-1.256	12	-0.363	0.358	6469	0.857
AP1M1	6.012	18	1.417	0.922	13951	1.078	-1.903	18	-0.448	0.327	6493	0.824	0.947	12	0.273	0.608	9272	1.014
AP1M2	-1.387	18	-0.327	0.372	6183	0.981	-2.974	18	-0.701	0.242	5315	0.744	-0.065	12	-0.019	0.493	7944	0.959
AP1S1	4.898	18	1.154	0.876	13164	1.085	0.725	18	0.171	0.568	9678	0.96	-3.034	12	-0.876	0.191	4275	0.69
AP1S3	-0.053	12	-0.015	0.494	7705	1.045	2.795	12	0.807	0.79	12526	1.033	-0.723	8	-0.256	0.399	6925	0.891
AP2A1	-3.921	18	-0.924	0.178	3625	0.799	-2.629	18	-0.62	0.268	5697	0.769	5.114	12	1.476	0.93	13401	1.073
AP2A2	-6.762	17	-1.64	0.05	1592	0.517	0.764	18	0.18	0.571	9729	0.961	-4.033	12	-1.164	0.122	3216	0.588
AP2B1	5.477	17	1.328	0.908	13692	1.082	2.599	18	0.613	0.73	11757	1.016	-14.36	12	-4.146	0	45	0.006
AP2M1	-1.4	18	-0.33	0.371	6168	0.98	4.169	18	0.983	0.837	13144	1.043	-5.709	12	-1.648	0.05	1845	0.417
AP2S1	8.991	18	2.119	0.983	15363	1.044	-3.408	18	-0.803	0.211	4836	0.714	-3.492	12	-1.008	0.157	3815	0.635
AP3B1	-0.07	15	-0.018	0.493	7695	1.045	-4.379	15	-1.131	0.129	3570	0.592	2.467	10	0.78	0.782	11335	1.068
AP3B2	5.751	18	1.355	0.912	13782	1.08	-3.189	18	-0.752	0.226	5084	0.728	-0.76	12	-0.219	0.413	7076	0.903
AP3D1	-0.256	18	-0.06	0.476	7485	1.037	-2.736	18	-0.645	0.26	5574	0.762	0.94	12	0.271	0.607	9265	1.013
AP3M1	3.559	17	0.863	0.806	12027	1.093	-1.505	18	-0.355	0.361	6972	0.849	-0.21	12	-0.06	0.476	7765	0.948
AP3M2	0.967	18	0.228	0.59	8994	1.07	2.998	18	0.707	0.76	12138	1.025	0.496	12	0.143	0.557	8676	0.993
AP3S2	-2.789	18	-0.657	0.255	4677	0.891	2.351	18	0.554	0.71	11494	1.012	-2.864	12	-0.827	0.204	4476	0.706
AP4B1	0.486	18	0.115	0.546	8388	1.061	0.004	18	0.001	0.5	8839	0.927	5.401	12	1.559	0.941	13579	1.071
AP4E1	-3.801	17	-0.922	0.178	3637	0.8	3.889	18	0.917	0.82	12906	1.041	1.745	12	0.504	0.693	10250	1.045
AP4M1	-4.652	18	-1.097	0.136	2997	0.742	-5.64	18	-1.329	0.092	2882	0.522	4.371	12	1.262	0.897	12892	1.076
AP5B1	9.657	15	2.493	0.994	15778	1.027	-2.201	15	-0.568	0.285	5918	0.788	-2.449	10	-0.775	0.219	4684	0.724
AP5M1	-5.113	18	-1.205	0.114	2654	0.701	0.676	18	0.159	0.563	9618	0.959	-0.968	12	-0.28	0.39	6820	0.884
AP5S1	-4.626	18	-1.09	0.138	3018	0.745	-7.324	18	-1.726	0.042	1840	0.375	3.684	12	1.064	0.856	12331	1.074
AP5Z1	-10.524	15	-2.717	0.003	335	0.16	-4.621	15	-1.193	0.116	3343	0.57	5.601	9	1.867	0.969	14134	1.06
APAF1	4.329	15	1.118	0.868	13029	1.087	0.894	15	0.231	0.591	9968	0.971	5.56	10	1.758	0.961	13954	1.065
APBA1	-0.181	18	-0.043	0.483	7573	1.04	0.92	18	0.217	0.586	9895	0.969	-2.646	12	-0.764	0.222	4741	0.726
APBA2	-2.538	15	-0.655	0.256	4686	0.892	-4.685	17	-1.136	0.128	3544	0.591	-2.081	12	-0.601	0.274	5400	0.785
APBA3	1.373	18	0.324	0.627	9460	1.081	-2.204	18	-0.52	0.302	6146	0.804	-3.852	12	-1.112	0.133	3397	0.606
APBB1	1.416	18	0.334	0.631	9506	1.082	-1.837	18	-0.433	0.333	6569	0.829	-0.197	12	-0.057	0.477	7782	0.949
APBB1IP	-5.167	17	-1.253	0.105	2527	0.678	9.021	18	2.126	0.983	15632	1.03	3.456	12	0.998	0.841	12137	1.071
APBB2	-1.932	18	-0.455	0.324	5536	0.956	-8.11	18	-1.912	0.028	1469	0.312	1.887	12	0.545	0.707	10396	1.052
APBB3	0.68	18	0.16	0.564	8620	1.067	4.573	18	1.078	0.859	13469	1.045	2.155	12	0.622	0.733	10709	1.059
APC	-9.299	17	-2.255	0.012	691	0.285	-2.57	18	-0.606	0.272	5759	0.774	-6.868	12	-1.983	0.024	1196	0.307
APC2	-3.951	18	-0.931	0.176	3596	0.798	-3.06	17	-0.742	0.229	5133	0.73	-4.727	11	-1.425	0.077	2423	0.492
APCDD1	-3.747	18	-0.883	0.189	3787	0.812	-7.415	18	-1.748	0.04	1804	0.365	3.245	12	0.937	0.826	11921	1.071
APCDD1L	4.293	17	1.041	0.851	12744	1.089	4.805	17	1.165	0.878	13733	1.047	0.198	12	0.057	0.523	8276	0.977
APEH	-2.272	18	-0.536	0.296	5190	0.931	-4.812	18	-1.134	0.128	3553	0.591	4.923	12	1.421	0.922	13275	1.075
APEX1	5.485	16	1.371	0.915	13832	1.079	-0.307	17	-0.075	0.47	8472	0.909	-6.753	12	-1.949	0.026	1255	0.316
APEX2	-1.278	18	-0.301	0.382	6315	0.986	-2.9	18	-0.683	0.247	5387	0.751	10.684	9	3.561	1	15315	1.01
APH1A	-4.257	18	-1.003	0.158	3328	0.774	4.801	18	1.132	0.871	13638	1.046	-2.005	12	-0.579	0.281	5497	0.792
APH1B	8.992	16	2.248	0.988	15526	1.038	5.984	18	1.41	0.921	14429	1.045	10.376	12	2.995	0.999	15157	1.019
APLF	7.04	18	1.659	0.951	14572	1.065	0.815	18	0.192	0.576	9789	0.964	-5.855	12	-1.69	0.046	1775	0.397
APLN	-2.278	18	-0.537	0.296	5185	0.93	-2.388	18	-0.563	0.287	5940	0.79	-6.405	12	-1.849	0.032	1447	0.344
APLNR	-3.874	17	-0.94	0.174	3563	0.795	3.115	18	0.734	0.769	12240	1.028	-4.513	11	-1.361	0.087	2630	0.511
APLP1	-6.298	18	-1.485	0.069	1927	0.583	-1.32	18	-0.311	0.378	7209	0.858	-1.945	12	-0.562	0.287	5574	0.797
APLP2	-0.798	18	-0.188	0.425	6842	1.014	-3.259	18	-0.768	0.221	5005	0.724	13.357	12	3.856	1	15366	1.007
APMAP	-5.866	18	-1.383	0.083	2163	0.629	3.664	18	0.864	0.806	12717	1.038	1.687	12	0.487	0.687	10177	1.044
APOA1	0.941	17	0.228	0.59	8995	1.07	-3.856	18	-0.909	0.182	4413	0.674	3.363	11	1.014	0.845	12180	1.073
APOA1BP	3.376	14	0.902	0.817	12204	1.091	-1.347	15	-0.348	0.364	7019	0.849	-0.657	10	-0.208	0.418	7122	0.907
APOA2	3.509	15	0.906	0.818	12220	1.091	8.742	15	2.257	0.988	15770	1.026	2.714	10	0.858	0.805	11621	1.071
APOA4	-1.656	18	-0.39	0.348	5866	0.968	-2.799	18	-0.66	0.255	5498	0.758	2.406	12	0.694	0.756	11007	1.063
APOA5	0.017	18	0.004	0.502	7820	1.046	-4.612	18	-1.087	0.138	3750	0.605	6.069	12	1.752	0.96	13941	1.065
APOB	0.052	18	0.012	0.505	7867	1.047	9.342	18	2.202	0.986	15711	1.028	-2.797	12	-0.808	0.21	4546	0.713
APOBEC1	8.474	14	2.265	0.988	15546	1.037	6.079	15	1.57	0.942	14773	1.044	-1.416	10	-0.448	0.327	6079	0.832
APOBEC2	-0.346	15	-0.089	0.464	7335	1.033	0.277	15	0.071	0.528	9189	0.941	7.271	10	2.299	0.989	14678	1.042
APOBEC3A	-1.218	9	-0.406	0.342	5797	0.963	2.523	9	0.841	0.8	12634	1.036	-0.244	6	-0.1	0.46	7583	0.939
APOBEC3D	11.055	15	2.854	0.998	16014	1.016	-4.017	15	-1.037	0.15	3929	0.624	-3.682	10	-1.165	0.122	3214	0.588
APOBEC3G	-2.699	12	-0.779	0.218	4167	0.853	4.295	12	1.24	0.893	13946	1.048	5.218	8	1.845	0.967	14105	1.061
APOBEC3H	-4.048	18	-0.954	0.17	3498	0.793	-5.414	17	-1.313	0.095	2933	0.528	-0.199	11	-0.06	0.476	7766	0.948
APOBR	3.045	15	0.786	0.784	11674	1.096	1.08	15	0.279	0.61	10199	0.979	0.4	10	0.126	0.55	8606	0.989
APOC3	-0.986	12	-0.285	0.388	6391	0.99	3.693	12	1.066	0.857	13431	1.044	3.901	8	1.379	0.916	13190	1.074
APOC4	3.559	18	0.839	0.799	11922	1.093	3.724	17	0.903	0.817	12859	1.04	2.592	12	0.748	0.773	11224	1.065
APOD	5.34	18	1.259	0.896	13498	1.083	-3.026	18	-0.713	0.238	5252	0.741	-9.311	12	-2.688	0.004	458	0.121
APOE	2.464	18	0.581	0.719	10753	1.091	-3.551	18	-0.837	0.201	4699	0.701	5.414	12	1.563	0.941	13589	1.071
APOF	-1.535	14	-0.41	0.341	5778	0.962	4.064	15	1.049	0.853	13381	1.043	10.342	10	3.27	0.999	15257	1.013
APOH	-7.658	18	-1.805	0.036	1272	0.456	4.316	18	1.017	0.845	13261	1.044	-7.182	12	-2.073	0.019	1038	0.284
APOL1	3.559	15	0.919	0.821	12268	1.091	8.343	15	2.154	0.984	15656	1.029	-2.955	10	-0.935	0.175	4082	0.663
APOL2	5.082	18	1.198	0.884	13327	1.082	-1.622	18	-0.382	0.351	6838	0.841	6.757	12	1.951	0.974	14247	1.058
APOL3	6.107	18	1.44	0.925	14012	1.077	-6.368	18	-1.501	0.067	2370	0.461	-9.189	12	-2.653	0.004	484	0.128
APOL4	0.051	15	0.013	0.505	7872	1.047	-0.247	15	-0.064	0.475	8526	0.911	0.047	9	0.016	0.506	8090	0.968
APOL5	-2.685	18	-0.633	0.263	4778	0.899	9.912	18	2.336	0.99	15844	1.023	0.241	12	0.07	0.528	8349	0.978
APOL6	5.267	12	1.52	0.936	14232	1.072	-4.301	12	-1.242	0.107	3171	0.553	-0.655	8	-0.232	0.408	7022	0.9
APOLD1	-5.573	14	-1.489	0.068	1912	0.582	19.221	15	4.963	1	16365	1	-2.103	9	-0.701	0.242	4986	0.75
APOM	-2.348	18	-0.553	0.29	5116	0.925	7.685	18	1.811	0.965	15232	1.037	1.497	12	0.432	0.667	9955	1.037
APOPT1	-2.094	12	-0.604	0.273	4905	0.907	-1.077	12	-0.311	0.378	7211	0.858	4.377	7	1.654	0.951	13756	1.069
APP	5.113	18	1.205	0.886	13349	1.082	-5.006	18	-1.18	0.119	3394	0.574	0.82	12	0.237	0.594	9110	1.008
APPBP2	3.426	18	0.807	0.79	11778	1.094	-2.021	18	-0.476	0.317	6361	0.816	-0.472	12	-0.136	0.446	7417	0.93
APPL1	0.201	18	0.047	0.519	8033	1.054	-2.415	17	-0.586	0.279	5839	0.782	0.096	12	0.028	0.511	8139	0.971
APPL2	1.924	17	0.467	0.68	10194	1.087	4.158	17	1.009	0.843	13237	1.043	1.436	12	0.415	0.661	9899	1.032
APRT	-1.404	18	-0.331	0.37	6165	0.98	-9.271	18	-2.185	0.014	1055	0.224	1.272	11	0.384	0.649	9756	1.03
APTX	-2.253	18	-0.531	0.298	5212	0.932	2.469	18	0.582	0.72	11629	1.013	5.81	12	1.677	0.953	13806	1.068
AQP1	-1.546	17	-0.375	0.354	5942	0.971	-1.99	18	-0.469	0.319	6401	0.817	-5.053	11	-1.524	0.064	2139	0.461
AQP10	0.523	15	0.135	0.554	8495	1.063	1.674	16	0.418	0.662	10877	0.997	-5.569	11	-1.679	0.047	1793	0.402
AQP11	4.358	15	1.125	0.87	13067	1.086	0.665	15	0.172	0.568	9685	0.96	-0.255	10	-0.081	0.468	7671	0.943
AQP2	-4.449	17	-1.079	0.14	3055	0.749	-4.39	18	-1.035	0.15	3938	0.625	-1.871	12	-0.54	0.295	5664	0.804
AQP3	6.393	17	1.551	0.94	14318	1.07	-0.553	18	-0.13	0.448	8161	0.899	11.13	12	3.213	0.999	15238	1.014
AQP4	-2.9	18	-0.683	0.247	4558	0.884	2.742	18	0.646	0.741	11896	1.02	-0.337	12	-0.097	0.461	7595	0.939
AQP5	3.636	18	0.857	0.804	12001	1.093	-6.312	18	-1.488	0.068	2410	0.465	3.357	12	0.969	0.834	12032	1.072
AQP6	13.483	18	3.178	0.999	16123	1.011	-5.947	18	-1.402	0.08	2656	0.496	-2.215	12	-0.639	0.261	5238	0.771
AQP8	-13.17	17	-3.194	0.001	168	0.068	1.891	18	0.446	0.672	10985	1.002	0.882	12	0.255	0.601	9192	1.01
AQP9	1.457	18	0.343	0.634	9555	1.083	-8.94	18	-2.107	0.018	1162	0.247	2.085	12	0.602	0.726	10609	1.059
AQR	-11.508	10	-3.639	0	98	0.023	-8.562	16	-2.141	0.016	1121	0.236	-0.274	6	-0.112	0.455	7528	0.936
AR	2.896	18	0.683	0.753	11233	1.093	-4.626	18	-1.09	0.138	3732	0.604	-2.93	12	-0.846	0.199	4401	0.699
ARAF	6.674	18	1.573	0.942	14374	1.069	3.55	18	0.837	0.799	12610	1.037	1.597	12	0.461	0.678	10078	1.04
ARAP1	3.789	17	0.919	0.821	12269	1.091	-5.3	18	-1.249	0.106	3147	0.55	9.077	12	2.62	0.996	14958	1.029
ARAP2	6.199	18	1.461	0.928	14069	1.076	-5.89	18	-1.388	0.083	2698	0.501	-7.057	12	-2.037	0.021	1093	0.294
ARAP3	-3.854	18	-0.908	0.182	3679	0.806	5.461	17	1.324	0.907	14184	1.047	-1.193	12	-0.344	0.365	6545	0.863
ARC	2.812	17	0.682	0.752	11230	1.093	6.264	18	1.476	0.93	14563	1.046	-10.852	12	-3.133	0.001	235	0.057
ARCN1	1.543	10	0.488	0.687	10307	1.087	2.638	13	0.732	0.768	12228	1.028	-3.79	8	-1.34	0.09	2683	0.52
AREL1	-8.567	17	-2.078	0.019	865	0.356	10.673	18	2.516	0.994	15978	1.018	-1.179	12	-0.34	0.367	6565	0.864
ARF3	5.737	15	1.481	0.931	14130	1.074	-1.848	15	-0.477	0.317	6353	0.816	6.213	10	1.965	0.975	14268	1.057
ARF5	-3.995	12	-1.153	0.124	2808	0.722	6.994	12	2.019	0.978	15504	1.033	-2.204	8	-0.779	0.218	4662	0.723
ARFGAP1	-8.194	18	-1.931	0.027	1082	0.403	0.76	18	0.179	0.571	9722	0.962	-1.886	12	-0.544	0.293	5650	0.802
ARFGAP2	-4.066	18	-0.958	0.169	3473	0.793	-2.985	17	-0.724	0.235	5214	0.736	-1.188	10	-0.376	0.354	6409	0.853
ARFGAP3	0.677	18	0.16	0.563	8617	1.066	0.301	18	0.071	0.528	9184	0.942	-0.915	12	-0.264	0.396	6882	0.89
ARFGEF1	-1.164	18	-0.274	0.392	6444	0.992	3.043	18	0.717	0.763	12176	1.026	-3.811	12	-1.1	0.136	3448	0.609
ARFGEF2	4.392	18	1.035	0.85	12717	1.09	-2.946	18	-0.694	0.244	5347	0.746	-2.519	12	-0.727	0.234	4880	0.74
ARFIP2	-2.492	18	-0.587	0.278	4976	0.913	-5.859	18	-1.381	0.084	2724	0.503	0.522	11	0.157	0.562	8734	0.996
ARFRP1	-2.483	12	-0.717	0.237	4422	0.873	7.344	16	1.836	0.967	15263	1.037	-6.88	6	-2.809	0.002	375	0.103
ARG1	3.272	18	0.771	0.78	11611	1.095	-3.583	18	-0.845	0.199	4667	0.699	-5.144	12	-1.485	0.069	2262	0.47
ARG2	-4.168	18	-0.982	0.163	3387	0.785	4.092	18	0.965	0.833	13081	1.042	-5.772	12	-1.666	0.048	1810	0.409
ARGLU1	3.468	17	0.841	0.8	11938	1.093	-19.891	18	-4.688	0	64	0	-13.473	11	-4.062	0	55	0.007
ARHGAP1	-0.705	15	-0.182	0.428	6869	1.016	-5.444	17	-1.32	0.093	2909	0.525	3.113	12	0.899	0.816	11768	1.072
ARHGAP10	10.574	18	2.492	0.994	15775	1.027	9.005	18	2.123	0.983	15629	1.03	2.448	12	0.707	0.76	11061	1.063
ARHGAP11A	2.526	9	0.842	0.8	11943	1.093	-3.079	9	-1.026	0.152	3966	0.629	-4.993	6	-2.038	0.021	1089	0.295
ARHGAP12	-3.719	18	-0.876	0.19	3820	0.813	3.429	16	0.857	0.804	12695	1.037	11.196	11	3.376	1	15277	1.012
ARHGAP15	-1.086	10	-0.343	0.366	6104	0.977	1.385	12	0.4	0.655	10782	0.995	-2.038	8	-0.72	0.236	4906	0.743
ARHGAP17	-1.768	18	-0.417	0.338	5745	0.961	-8.704	18	-2.052	0.02	1247	0.264	-7.266	12	-2.098	0.018	1005	0.277
ARHGAP18	-4.255	18	-1.003	0.158	3329	0.774	-4.247	18	-1.001	0.158	4063	0.638	-0.626	12	-0.181	0.428	7228	0.917
ARHGAP19	10.718	18	2.526	0.994	15804	1.026	7.396	18	1.743	0.959	15110	1.039	-4.961	10	-1.569	0.058	2030	0.445
ARHGAP20	-3.152	18	-0.743	0.229	4321	0.864	-1.861	18	-0.439	0.33	6541	0.827	1.358	12	0.392	0.653	9794	1.03
ARHGAP21	-8.371	18	-1.973	0.024	1016	0.389	-8.413	18	-1.983	0.024	1350	0.287	6.085	12	1.757	0.961	13949	1.065
ARHGAP22	-4.525	16	-1.131	0.129	2878	0.731	-8.989	17	-2.18	0.015	1060	0.226	-1.791	12	-0.517	0.303	5758	0.813
ARHGAP23	-1.851	18	-0.436	0.331	5634	0.959	-2.04	18	-0.481	0.315	6332	0.815	4.892	12	1.412	0.921	13249	1.075
ARHGAP24	-4.966	18	-1.171	0.121	2751	0.717	-1.54	18	-0.363	0.358	6939	0.845	-2.647	12	-0.764	0.222	4739	0.726
ARHGAP25	-5.582	18	-1.316	0.094	2341	0.656	0.686	18	0.162	0.564	9625	0.96	-0.505	12	-0.146	0.442	7371	0.928
ARHGAP26	5.297	18	1.248	0.894	13464	1.083	7.858	18	1.852	0.968	15286	1.037	-7.227	12	-2.086	0.018	1018	0.281
ARHGAP27	-1.667	16	-0.417	0.338	5744	0.961	1.609	18	0.379	0.648	10682	0.993	-6.036	12	-1.742	0.041	1658	0.38
ARHGAP28	0.429	18	0.101	0.54	8310	1.06	-0.937	18	-0.221	0.413	7677	0.88	4.118	12	1.189	0.883	12698	1.075
ARHGAP29	-2.951	18	-0.696	0.243	4507	0.881	9.013	18	2.124	0.983	15631	1.03	3.514	12	1.015	0.845	12184	1.072
ARHGAP30	3.107	15	0.802	0.789	11749	1.095	-2.58	18	-0.608	0.272	5750	0.773	1.729	11	0.521	0.699	10316	1.048
ARHGAP31	5.923	18	1.396	0.919	13895	1.078	-2.559	18	-0.603	0.273	5767	0.776	3.356	12	0.969	0.834	12031	1.072
ARHGAP32	-1.166	18	-0.275	0.392	6440	0.992	-0.238	18	-0.056	0.478	8570	0.912	-3.337	12	-0.963	0.168	3969	0.654
ARHGAP33	0.564	18	0.133	0.553	8480	1.063	0.892	18	0.21	0.583	9872	0.967	-3.033	12	-0.876	0.191	4279	0.689
ARHGAP35	-1.378	18	-0.325	0.373	6189	0.982	-1.213	18	-0.286	0.388	7356	0.862	5.795	12	1.673	0.953	13798	1.068
ARHGAP36	8.064	18	1.901	0.971	15049	1.053	8.016	18	1.889	0.971	15334	1.036	-11.836	12	-3.417	0	156	0.031
ARHGAP39	2.518	18	0.593	0.724	10811	1.092	-4.314	18	-1.017	0.155	3998	0.633	6.861	12	1.981	0.976	14294	1.056
ARHGAP4	-8.353	18	-1.969	0.024	1025	0.39	-1.467	18	-0.346	0.365	7029	0.849	0.275	12	0.079	0.532	8392	0.98
ARHGAP40	7.396	17	1.794	0.964	14847	1.059	3.112	18	0.733	0.768	12237	1.028	-3.231	11	-0.974	0.165	3930	0.649
ARHGAP42	-0.156	12	-0.045	0.482	7560	1.04	2.436	12	0.703	0.759	12126	1.025	-1.836	7	-0.694	0.244	5024	0.751
ARHGAP44	0.85	18	0.2	0.579	8851	1.068	4.402	18	1.038	0.85	13337	1.044	-3.81	12	-1.1	0.136	3449	0.608
ARHGAP5	1.888	12	0.545	0.707	10568	1.091	3.288	12	0.949	0.829	13034	1.041	0.554	8	0.196	0.578	8903	1.003
ARHGAP6	6.183	18	1.457	0.927	14059	1.076	5.799	18	1.367	0.914	14304	1.046	-1.896	12	-0.547	0.292	5636	0.801
ARHGAP8	-1.48	18	-0.349	0.364	6077	0.976	-5.336	18	-1.258	0.104	3124	0.546	-2.936	12	-0.847	0.198	4393	0.698
ARHGAP9	10.456	16	2.614	0.996	15870	1.023	3.359	16	0.84	0.799	12626	1.037	-7.929	11	-2.391	0.008	669	0.194
ARHGDIA	-2.714	18	-0.64	0.261	4744	0.898	-4.392	18	-1.035	0.15	3937	0.625	-1.052	12	-0.304	0.381	6715	0.877
ARHGDIB	3.904	18	0.92	0.821	12274	1.091	1.446	18	0.341	0.633	10509	0.987	4.993	12	1.441	0.925	13318	1.075
ARHGDIG	7.652	18	1.804	0.964	14868	1.058	3.187	18	0.751	0.774	12318	1.028	-7.685	12	-2.219	0.013	846	0.242
ARHGEF1	3.02	18	0.712	0.762	11357	1.094	7.163	18	1.688	0.954	15019	1.04	3.944	12	1.138	0.873	12563	1.074
ARHGEF10	1.456	18	0.343	0.634	9553	1.083	-13.745	18	-3.24	0.001	268	0.037	-4.559	12	-1.316	0.094	2750	0.529
ARHGEF10L	-4.042	18	-0.953	0.17	3504	0.793	-6.584	18	-1.552	0.06	2238	0.441	-2.822	12	-0.815	0.208	4517	0.711
ARHGEF11	-2.643	17	-0.641	0.261	4739	0.897	3.876	18	0.914	0.82	12889	1.041	7.772	12	2.244	0.988	14617	1.045
ARHGEF12	0.011	18	0.003	0.501	7811	1.046	-1.943	18	-0.458	0.324	6458	0.82	0.611	12	0.176	0.57	8815	1
ARHGEF15	1.994	15	0.515	0.697	10429	1.09	-11.19	15	-2.889	0.002	411	0.077	12.923	10	4.087	1	15403	1.004
ARHGEF16	3.379	18	0.796	0.787	11720	1.095	-2.551	18	-0.601	0.274	5779	0.776	1.503	11	0.453	0.675	10044	1.039
ARHGEF17	-5.015	18	-1.182	0.119	2716	0.712	-6.7	18	-1.579	0.057	2173	0.431	5.019	12	1.449	0.926	13338	1.074
ARHGEF18	2.882	18	0.679	0.752	11213	1.093	-6.092	18	-1.436	0.076	2548	0.485	0.883	12	0.255	0.601	9193	1.011
ARHGEF19	-5.323	18	-1.255	0.105	2524	0.677	-0.708	18	-0.167	0.434	7983	0.889	8.68	11	2.617	0.996	14955	1.03
ARHGEF2	0.74	18	0.174	0.569	8697	1.067	1.602	18	0.378	0.647	10667	0.993	7.143	12	2.062	0.98	14414	1.052
ARHGEF25	-3.252	17	-0.789	0.215	4139	0.848	-3.595	18	-0.847	0.198	4658	0.697	2.499	12	0.721	0.765	11120	1.064
ARHGEF26	-1.127	18	-0.266	0.395	6497	0.992	1.478	18	0.348	0.636	10539	0.988	-6.649	12	-1.919	0.027	1316	0.323
ARHGEF28	-0.6	18	-0.141	0.444	7048	1.027	-2.51	18	-0.592	0.277	5819	0.779	-4.61	12	-1.331	0.092	2713	0.522
ARHGEF3	-4.276	18	-1.008	0.157	3305	0.774	2.839	18	0.669	0.748	11996	1.021	-8.701	12	-2.512	0.006	583	0.159
ARHGEF33	-2.828	18	-0.667	0.252	4628	0.89	1.753	18	0.413	0.66	10847	0.996	-5.994	12	-1.73	0.042	1683	0.384
ARHGEF37	2.16	18	0.509	0.695	10404	1.089	1.506	18	0.355	0.639	10565	0.99	-5.301	12	-1.53	0.063	2125	0.458
ARHGEF38	-9.091	18	-2.143	0.016	794	0.33	-1.222	18	-0.288	0.387	7337	0.863	0.993	12	0.287	0.613	9328	1.016
ARHGEF39	-1.483	18	-0.35	0.363	6073	0.976	4.323	18	1.019	0.846	13265	1.044	6.086	12	1.757	0.961	13950	1.065
ARHGEF4	-1.245	15	-0.321	0.374	6212	0.982	0.562	15	0.145	0.558	9557	0.955	1.078	10	0.341	0.633	9566	1.024
ARHGEF40	0.052	18	0.012	0.505	7868	1.047	7.098	18	1.673	0.953	14993	1.04	4.775	12	1.379	0.916	13187	1.074
ARHGEF5	0.203	9	0.068	0.527	8144	1.055	-5.951	9	-1.984	0.024	1347	0.287	-2.424	6	-0.99	0.161	3877	0.643
ARHGEF6	10.33	18	2.435	0.993	15726	1.029	2.148	18	0.506	0.694	11281	1.007	2.466	12	0.712	0.762	11081	1.063
ARHGEF7	-2.295	18	-0.541	0.294	5170	0.928	6.983	18	1.646	0.95	14935	1.041	-0.085	11	-0.026	0.49	7907	0.958
ARHGEF9	0.416	18	0.098	0.539	8292	1.06	4.107	18	0.968	0.833	13101	1.041	13.045	12	3.766	1	15348	1.008
ARID1A	-4.333	16	-1.083	0.139	3038	0.748	-1.609	15	-0.415	0.339	6665	0.832	-7.529	11	-2.27	0.012	778	0.231
ARID1B	-0.018	18	-0.004	0.498	7774	1.046	0.839	18	0.198	0.578	9814	0.965	-3.784	12	-1.092	0.137	3483	0.61
ARID2	-0.563	18	-0.133	0.447	7093	1.028	0.352	18	0.083	0.533	9250	0.943	0.053	12	0.015	0.506	8086	0.968
ARID3A	-4.606	18	-1.086	0.139	3034	0.746	-2.763	18	-0.651	0.257	5536	0.761	-3.118	12	-0.9	0.184	4184	0.68
ARID3C	7.575	17	1.837	0.967	14928	1.056	-7.114	18	-1.677	0.047	1938	0.395	-9.756	12	-2.816	0.002	369	0.102
ARID4A	-0.716	12	-0.207	0.418	6752	1.01	3.265	12	0.943	0.827	12998	1.042	-2.613	8	-0.924	0.178	4110	0.669
ARID4B	0.965	18	0.228	0.59	8993	1.07	2.066	18	0.487	0.687	11195	1.004	-4.935	12	-1.425	0.077	2425	0.492
ARID5A	1.413	18	0.333	0.63	9502	1.082	-0.091	18	-0.022	0.491	8713	0.923	-0.683	12	-0.197	0.422	7166	0.91
ARID5B	11.237	17	2.725	0.997	15922	1.021	6.765	18	1.594	0.945	14826	1.043	-1.796	12	-0.519	0.302	5753	0.812
ARIH1	-3.212	12	-0.927	0.177	3611	0.799	-8.989	18	-2.119	0.017	1147	0.243	0.795	9	0.265	0.605	9236	1.012
ARIH2	-6.966	12	-2.011	0.022	964	0.375	-1.361	12	-0.393	0.347	6776	0.839	-1.205	8	-0.426	0.335	6175	0.839
ARIH2OS	-6.37	15	-1.645	0.05	1581	0.516	3.492	15	0.902	0.816	12855	1.04	2.721	10	0.861	0.805	11632	1.071
ARL1	-7.822	12	-2.258	0.012	685	0.285	-5.952	12	-1.718	0.043	1855	0.378	-1.859	8	-0.657	0.256	5176	0.764
ARL10	-1.387	18	-0.327	0.372	6182	0.981	-0.705	18	-0.166	0.434	7985	0.89	2.115	12	0.61	0.729	10652	1.059
ARL11	2.325	15	0.6	0.726	10837	1.092	4.697	15	1.213	0.887	13879	1.047	-13.377	10	-4.23	0	38	0.005
ARL13A	6.177	9	2.059	0.98	15275	1.047	4.223	9	1.408	0.92	14422	1.045	0.584	6	0.238	0.594	9120	1.008
ARL13B	0.846	16	0.211	0.584	8907	1.069	13.701	18	3.229	0.999	16264	1.006	2.185	12	0.631	0.736	10741	1.06
ARL14EP	0.553	9	0.184	0.573	8764	1.067	-1.543	9	-0.514	0.303	6160	0.807	-3.233	6	-1.32	0.093	2741	0.527
ARL14EPL	3.658	13	1.015	0.845	12648	1.089	-3.337	15	-0.862	0.194	4586	0.694	-1.951	10	-0.617	0.269	5323	0.78
ARL15	-4.536	18	-1.069	0.143	3096	0.751	-0.212	18	-0.05	0.48	8595	0.914	-8.032	12	-2.319	0.01	732	0.216
ARL16	6.544	15	1.69	0.954	14645	1.063	-3.379	15	-0.872	0.191	4543	0.69	1.556	10	0.492	0.689	10205	1.044
ARL2	5.617	14	1.501	0.933	14178	1.074	1.342	17	0.326	0.628	10435	0.985	-8.267	8	-2.923	0.002	313	0.086
ARL3	0.465	12	0.134	0.553	8487	1.064	4.198	12	1.212	0.887	13870	1.047	0.412	8	0.146	0.558	8685	0.994
ARL4C	5.257	15	1.357	0.913	13797	1.079	-0.505	15	-0.131	0.448	8158	0.899	6.942	10	2.195	0.986	14555	1.048
ARL4D	-2.25	9	-0.75	0.227	4286	0.863	5.861	9	1.954	0.975	15416	1.035	0.745	6	0.304	0.619	9405	1.019
ARL5C	-0.83	18	-0.196	0.422	6794	1.014	1.631	18	0.384	0.65	10705	0.993	-1.809	12	-0.522	0.301	5739	0.811
ARL6	4.879	9	1.626	0.948	14473	1.068	0.824	9	0.275	0.608	10178	0.978	0.027	6	0.011	0.504	8064	0.967
ARL6IP4	-7.261	18	-1.711	0.044	1451	0.489	0.428	18	0.101	0.54	9337	0.947	1.308	12	0.378	0.647	9733	1.028
ARL6IP5	0.938	15	0.242	0.596	9060	1.072	-2.811	15	-0.726	0.234	5203	0.736	0.081	10	0.025	0.51	8132	0.97
ARL6IP6	-7.066	12	-2.04	0.021	923	0.366	-1.002	12	-0.289	0.386	7331	0.862	1.992	8	0.704	0.759	11053	1.063
ARL8A	-2.217	18	-0.523	0.301	5244	0.935	2.009	18	0.473	0.682	11122	1.004	5.208	12	1.504	0.934	13465	1.072
ARL9	3.963	9	1.321	0.907	13663	1.082	-2.037	9	-0.679	0.249	5401	0.754	-3.102	6	-1.266	0.103	2910	0.546
ARMC1	4.231	14	1.131	0.871	13079	1.086	-7.425	15	-1.917	0.028	1459	0.31	2.692	10	0.851	0.803	11592	1.071
ARMC12	0.438	13	0.122	0.548	8421	1.062	-3.974	13	-1.102	0.135	3680	0.601	1.059	9	0.353	0.638	9615	1.026
ARMC2	-4.705	18	-1.109	0.134	2959	0.737	1.128	18	0.266	0.605	10134	0.977	-1.936	12	-0.559	0.288	5582	0.798
ARMC3	-0.329	18	-0.077	0.469	7386	1.036	10.669	18	2.515	0.994	15977	1.018	-1.823	12	-0.526	0.299	5722	0.809
ARMC4	0.91	18	0.215	0.585	8923	1.069	1.215	18	0.286	0.613	10239	0.98	-2.316	12	-0.668	0.252	5133	0.759
ARMC5	0.17	18	0.04	0.516	8002	1.052	2.959	18	0.697	0.757	12107	1.024	2.001	9	0.667	0.748	10907	1.06
ARMC6	-4.652	15	-1.201	0.115	2664	0.703	-5.204	17	-1.262	0.103	3109	0.545	6.236	10	1.972	0.976	14282	1.057
ARMC7	-4.283	16	-1.071	0.142	3090	0.75	5.618	17	1.363	0.913	14292	1.046	0.927	11	0.279	0.61	9293	1.015
ARMC8	3.839	18	0.905	0.817	12213	1.091	-10.165	18	-2.396	0.008	778	0.174	0.041	12	0.012	0.505	8068	0.968
ARMC9	1.847	18	0.435	0.668	10016	1.088	-5.063	18	-1.193	0.116	3338	0.571	-2.277	12	-0.657	0.256	5177	0.763
ARMCX1	5.025	12	1.45	0.927	14040	1.076	-0.996	12	-0.288	0.387	7342	0.862	-5.417	8	-1.915	0.028	1328	0.323
ARMCX2	-3.499	12	-1.01	0.156	3294	0.774	-2.165	12	-0.625	0.266	5677	0.767	3.304	8	1.168	0.879	12647	1.075
ARMCX3	-4.445	12	-1.283	0.1	2428	0.67	-4.16	12	-1.201	0.115	3312	0.568	-3.631	8	-1.284	0.1	2846	0.542
ARMCX4	0.766	15	0.198	0.578	8831	1.068	-8.781	15	-2.267	0.012	940	0.203	-2.857	10	-0.903	0.183	4176	0.678
ARMCX5	3.094	15	0.799	0.788	11734	1.095	1.722	15	0.445	0.672	10981	1.001	4.839	10	1.53	0.937	13526	1.071
ARMS2	-2.895	9	-0.965	0.167	3447	0.791	-0.89	9	-0.297	0.383	7297	0.86	-4.886	6	-1.995	0.023	1173	0.304
ARNT	-1.006	18	-0.237	0.406	6631	0.999	-5.855	18	-1.38	0.084	2729	0.503	0.321	12	0.093	0.537	8460	0.982
ARNT2	0.886	18	0.209	0.583	8892	1.069	-1.534	18	-0.362	0.359	6943	0.846	0.247	12	0.071	0.528	8357	0.978
ARNTL	-3.049	17	-0.739	0.23	4337	0.864	-4.939	18	-1.164	0.122	3451	0.58	-2.277	12	-0.657	0.256	5175	0.764
ARNTL2	-8.444	18	-1.99	0.023	988	0.384	1.082	18	0.255	0.601	10079	0.976	-6.02	12	-1.738	0.041	1670	0.381
ARPC1A	3.305	11	0.996	0.84	12594	1.088	-3.271	12	-0.944	0.173	4260	0.663	-1	8	-0.353	0.362	6505	0.86
ARPC1B	10.564	18	2.49	0.994	15772	1.028	-10.201	18	-2.404	0.008	769	0.172	4.589	10	1.451	0.927	13343	1.074
ARPC2	5.975	18	1.408	0.92	13924	1.078	7.324	18	1.726	0.958	15081	1.04	-4.297	11	-1.296	0.098	2812	0.537
ARPC4	2.852	18	0.672	0.749	11182	1.093	1.162	18	0.274	0.608	10173	0.978	5.845	11	1.762	0.961	13963	1.064
ARPC5	-2.639	18	-0.622	0.267	4832	0.901	-2.113	18	-0.498	0.309	6241	0.811	-5.311	12	-1.533	0.063	2116	0.458
ARPC5L	20.009	18	4.716	1	16305	1	-10.657	18	-2.512	0.006	669	0.147	4.983	11	1.502	0.934	13462	1.073
ARPP21	-4.477	18	-1.055	0.146	3133	0.758	-6.069	18	-1.43	0.076	2571	0.486	-0.227	12	-0.065	0.474	7741	0.947
ARR3	2.963	18	0.698	0.758	11297	1.094	1.621	18	0.382	0.649	10696	0.993	-1.672	12	-0.483	0.315	5913	0.823
ARRB1	4.211	18	0.993	0.84	12580	1.088	-3.792	18	-0.894	0.186	4468	0.68	3.869	12	1.117	0.868	12498	1.074
ARRB2	-13.429	18	-3.165	0.001	178	0.071	5.166	18	1.218	0.888	13897	1.046	2.601	12	0.751	0.774	11234	1.065
ARRDC1	8.834	18	2.082	0.981	15312	1.045	0.719	18	0.169	0.567	9672	0.96	1.848	12	0.533	0.703	10365	1.049
ARRDC2	-0.067	18	-0.016	0.494	7704	1.045	-9.523	17	-2.31	0.01	879	0.195	-1.791	11	-0.54	0.295	5665	0.804
ARRDC3	2.607	18	0.614	0.731	10909	1.092	-10.098	18	-2.38	0.009	799	0.177	-3.309	12	-0.955	0.17	4005	0.656
ARRDC4	-5.339	18	-1.258	0.104	2513	0.676	-5.642	18	-1.33	0.092	2881	0.522	7.452	12	2.151	0.984	14512	1.049
ARRDC5	-8.774	18	-2.068	0.019	878	0.359	-3.955	18	-0.932	0.176	4314	0.666	0.234	12	0.067	0.527	8339	0.977
ARSA	0.026	16	0.006	0.503	7831	1.047	7.033	17	1.706	0.956	15053	1.04	-14.253	11	-4.297	0	33	0.004
ARSB	-0.71	15	-0.183	0.427	6864	1.015	-1.433	15	-0.37	0.356	6901	0.844	-6.694	11	-2.018	0.022	1131	0.298
ARSD	-5.375	18	-1.267	0.103	2474	0.676	0.958	18	0.226	0.589	9949	0.97	-6.099	12	-1.761	0.039	1609	0.376
ARSE	6.325	18	1.491	0.932	14151	1.074	6.986	18	1.647	0.95	14936	1.041	-4.634	12	-1.338	0.091	2689	0.521
ARSF	6.455	18	1.521	0.936	14235	1.072	-5.82	18	-1.372	0.085	2759	0.505	-6.485	12	-1.872	0.031	1412	0.335
ARSG	-0.094	18	-0.022	0.491	7675	1.044	2.472	18	0.583	0.72	11630	1.013	-4.492	12	-1.297	0.097	2807	0.537
ARSH	-2.14	18	-0.504	0.307	5332	0.939	-8.965	18	-2.113	0.017	1153	0.246	4.938	12	1.425	0.923	13286	1.074
ARSI	0.835	18	0.197	0.578	8824	1.068	-5.181	18	-1.221	0.111	3239	0.561	-0.174	12	-0.05	0.48	7800	0.952
ARSJ	1.516	18	0.357	0.64	9620	1.084	2.378	18	0.561	0.712	11522	1.012	-1.008	12	-0.291	0.386	6760	0.882
ARSK	-3.233	15	-0.835	0.202	3957	0.832	-3.628	15	-0.937	0.174	4295	0.665	-0.685	10	-0.217	0.414	7091	0.903
ART1	-2.994	15	-0.773	0.22	4193	0.855	1.111	15	0.287	0.613	10241	0.98	-0.377	10	-0.119	0.453	7495	0.934
ART4	4.855	15	1.254	0.895	13480	1.083	0.457	15	0.118	0.547	9417	0.951	1.968	10	0.622	0.733	10710	1.059
ART5	-11.337	18	-2.672	0.004	354	0.174	-0.217	18	-0.051	0.48	8589	0.914	2.75	12	0.794	0.786	11384	1.068
ARTN	0.137	9	0.046	0.518	8028	1.053	4.303	9	1.434	0.924	14481	1.045	-0.266	6	-0.108	0.457	7542	0.937
ARV1	-1.086	18	-0.256	0.399	6545	0.994	-4.125	18	-0.972	0.165	4173	0.649	-7.44	12	-2.148	0.016	941	0.261
ARVCF	3.722	17	0.903	0.817	12206	1.091	-6.876	17	-1.668	0.048	1949	0.401	5.383	12	1.554	0.94	13567	1.072
ARX	-1.293	18	-0.305	0.38	6299	0.985	0.944	18	0.223	0.588	9923	0.97	-5.972	12	-1.724	0.042	1694	0.387
AS3MT	15.115	15	3.903	1	16267	1.003	-11.492	15	-2.967	0.002	372	0.066	-0.316	10	-0.1	0.46	7581	0.939
ASAH1	8.908	18	2.1	0.982	15339	1.044	-6.966	18	-1.642	0.05	2021	0.408	-0.197	12	-0.057	0.477	7781	0.949
ASAH2	5.683	15	1.467	0.929	14093	1.075	-1.433	15	-0.37	0.356	6902	0.844	0.432	10	0.137	0.554	8642	0.992
ASAP1	-0.54	18	-0.127	0.449	7121	1.029	-3.637	18	-0.857	0.196	4607	0.695	-1.521	12	-0.439	0.33	6119	0.835
ASAP2	-6.053	18	-1.427	0.077	2056	0.609	-13.04	18	-3.074	0.001	318	0.054	-1.959	12	-0.565	0.286	5561	0.795
ASAP3	2.22	15	0.573	0.717	10714	1.091	2.761	15	0.713	0.762	12158	1.026	3.188	10	1.008	0.843	12171	1.072
ASB1	3.121	18	0.736	0.769	11465	1.094	5.819	18	1.371	0.915	14320	1.046	-4.245	12	-1.225	0.11	3027	0.563
ASB10	3.431	17	0.832	0.797	11888	1.094	8.601	18	2.027	0.979	15514	1.033	-4.642	10	-1.468	0.071	2308	0.476
ASB11	4.734	18	1.116	0.868	13023	1.087	-4.427	18	-1.043	0.148	3903	0.622	4.997	11	1.507	0.934	13469	1.073
ASB12	11.042	15	2.851	0.998	16013	1.016	-2.836	15	-0.732	0.232	5179	0.733	5.459	10	1.726	0.958	13889	1.067
ASB13	0.141	18	0.033	0.513	7972	1.05	-0.865	17	-0.21	0.417	7741	0.882	2.505	12	0.723	0.765	11130	1.063
ASB14	-3.408	18	-0.803	0.211	4083	0.842	3.96	18	0.933	0.825	12963	1.041	-4.124	12	-1.19	0.117	3147	0.575
ASB15	8.208	15	2.119	0.983	15364	1.043	10.324	15	2.666	0.996	16080	1.014	5.64	10	1.784	0.963	14005	1.063
ASB16	-3.416	18	-0.805	0.21	4076	0.842	-0.868	18	-0.205	0.419	7781	0.881	5.594	12	1.615	0.947	13680	1.071
ASB18	0.74	18	0.174	0.569	8700	1.067	0.287	18	0.068	0.527	9166	0.941	-9.661	11	-2.913	0.002	319	0.087
ASB2	0.319	18	0.075	0.53	8183	1.056	-13.095	18	-3.086	0.001	314	0.053	16.119	12	4.653	1	15428	1.003
ASB3	-2.792	18	-0.658	0.255	4670	0.891	0.444	18	0.105	0.542	9354	0.948	-3.375	11	-1.018	0.154	3770	0.633
ASB4	3.452	15	0.891	0.814	12157	1.092	-2.141	15	-0.553	0.29	5988	0.793	3.439	10	1.087	0.862	12412	1.074
ASB5	2.601	18	0.613	0.73	10905	1.092	4.593	18	1.083	0.861	13481	1.045	4.526	11	1.365	0.914	13145	1.075
ASB6	0.523	17	0.127	0.55	8445	1.063	-9.516	18	-2.243	0.012	979	0.208	2.517	12	0.726	0.766	11142	1.064
ASB7	3.63	15	0.937	0.826	12343	1.091	1.481	15	0.383	0.649	10697	0.993	-0.323	10	-0.102	0.459	7573	0.938
ASB8	-5.213	18	-1.229	0.11	2590	0.69	-12.295	18	-2.898	0.002	408	0.075	0.134	12	0.039	0.515	8190	0.973
ASB9	-0.684	15	-0.177	0.43	6895	1.017	-2.854	15	-0.737	0.231	5157	0.732	-4.203	10	-1.329	0.092	2714	0.524
ASCC1	-0.269	15	-0.069	0.472	7432	1.037	2.574	15	0.665	0.747	11977	1.021	2.897	10	0.916	0.82	11839	1.071
ASCC2	-4.15	18	-0.978	0.164	3405	0.786	-1.454	18	-0.343	0.366	7043	0.851	-3.001	12	-0.866	0.193	4317	0.692
ASCC3	-5.767	16	-1.442	0.075	2028	0.601	4.732	18	1.115	0.868	13587	1.045	4.87	11	1.468	0.929	13373	1.074
ASCL1	-1.728	12	-0.499	0.309	5360	0.94	-4.52	12	-1.305	0.096	2960	0.531	2.55	8	0.902	0.816	11779	1.072
ASCL2	-1.782	12	-0.514	0.304	5281	0.937	-4.197	12	-1.212	0.113	3271	0.565	-0.185	8	-0.065	0.474	7740	0.947
ASCL3	-0.098	12	-0.028	0.489	7648	1.042	2.115	12	0.611	0.729	11742	1.017	-10.038	8	-3.549	0	130	0.023
ASCL4	3.712	15	0.959	0.831	12436	1.09	-6.035	15	-1.558	0.06	2227	0.438	-6.323	10	-2	0.023	1169	0.301
ASCL5	-10.616	18	-2.502	0.006	466	0.216	4.382	18	1.033	0.849	13312	1.044	-0.503	12	-0.145	0.442	7373	0.928
ASF1A	-10.081	18	-2.376	0.009	572	0.249	7.604	18	1.792	0.963	15194	1.038	-5.371	12	-1.55	0.061	2067	0.453
ASF1B	5.908	18	1.393	0.918	13883	1.079	1.313	18	0.309	0.622	10344	0.984	-1.468	12	-0.424	0.336	6185	0.84
ASGR1	-5.786	17	-1.403	0.08	2117	0.618	-0.083	16	-0.021	0.492	8718	0.923	5.423	12	1.566	0.941	13592	1.071
ASGR2	3.288	15	0.849	0.802	11970	1.093	-15.356	15	-3.965	0	111	0.005	-5.043	10	-1.595	0.055	1978	0.433
ASH1L	1.432	17	0.347	0.636	9569	1.084	-0.777	17	-0.189	0.425	7869	0.885	8.731	12	2.521	0.994	14894	1.032
ASH2L	0.018	18	0.004	0.502	7822	1.046	14.763	18	3.48	1	16310	1.003	4.796	12	1.384	0.917	13197	1.075
ASIC1	-7.394	18	-1.743	0.041	1393	0.476	-3.499	18	-0.825	0.205	4753	0.705	1.562	12	0.451	0.674	10036	1.039
ASIC2	-2.12	18	-0.5	0.309	5355	0.94	3.843	18	0.906	0.818	12865	1.04	-0.502	12	-0.145	0.442	7378	0.927
ASIC3	4.017	18	0.947	0.828	12377	1.091	-6.143	18	-1.448	0.074	2519	0.48	6.235	12	1.8	0.964	14039	1.062
ASIC4	1.851	18	0.436	0.669	10020	1.088	9.444	18	2.226	0.987	15731	1.027	5.734	12	1.655	0.951	13763	1.069
ASIC5	2.271	15	0.586	0.721	10778	1.091	-1.763	15	-0.455	0.325	6468	0.821	-5.445	10	-1.722	0.043	1701	0.387
ASIP	-0.253	12	-0.073	0.471	7413	1.036	-6.367	12	-1.838	0.033	1620	0.334	-0.693	8	-0.245	0.403	6969	0.895
ASL	-3.53	18	-0.832	0.203	3968	0.833	-1.111	18	-0.262	0.397	7474	0.869	4.383	12	1.265	0.897	12899	1.076
ASNA1	-1.115	17	-0.271	0.393	6466	0.992	-1.917	18	-0.452	0.326	6479	0.823	12.247	12	3.535	1	15309	1.01
ASNSD1	6.747	18	1.59	0.944	14413	1.068	2.358	18	0.556	0.711	11503	1.012	-6.041	12	-1.744	0.041	1654	0.38
ASPA	-7.775	18	-1.833	0.033	1209	0.451	-1.23	18	-0.29	0.386	7328	0.862	0.23	12	0.066	0.526	8336	0.977
ASPDH	1.284	18	0.303	0.619	9359	1.079	-1.646	18	-0.388	0.349	6806	0.839	15.081	12	4.353	1	15421	1.003
ASPG	5.105	18	1.203	0.886	13342	1.083	2.246	18	0.529	0.702	11388	1.009	6.69	12	1.931	0.973	14222	1.058
ASPH	3.178	18	0.749	0.773	11518	1.095	0.106	18	0.025	0.51	8950	0.933	-6.339	11	-1.911	0.028	1339	0.323
ASPHD1	-0.563	13	-0.156	0.438	6988	1.022	4.749	13	1.317	0.906	14161	1.047	-4.147	9	-1.382	0.083	2559	0.504
ASPHD2	3.268	18	0.77	0.779	11608	1.095	-9.324	18	-2.198	0.014	1039	0.22	6.072	12	1.753	0.96	13944	1.065
ASPM	8.251	18	1.945	0.974	15114	1.051	-3.005	18	-0.708	0.239	5277	0.743	-6.193	12	-1.788	0.037	1550	0.368
ASPRV1	6.117	12	1.766	0.961	14789	1.06	-5.456	12	-1.575	0.058	2184	0.432	0.069	8	0.024	0.51	8125	0.97
ASPSCR1	-1.412	18	-0.333	0.37	6153	0.98	-7.348	18	-1.732	0.042	1833	0.372	-7.37	12	-2.128	0.017	963	0.268
ASRGL1	-1.202	18	-0.283	0.389	6397	0.991	-0.35	18	-0.083	0.467	8424	0.908	-1.99	12	-0.574	0.283	5516	0.793
ASTE1	-5.02	17	-1.217	0.112	2621	0.695	6.375	18	1.503	0.934	14639	1.044	3.628	12	1.047	0.853	12281	1.074
ASTL	-8.484	16	-2.121	0.017	814	0.34	-5.189	18	-1.223	0.111	3234	0.56	-2.636	10	-0.834	0.202	4448	0.703
ASTN1	2.042	18	0.481	0.685	10270	1.088	-17.441	18	-4.111	0	94	0.003	-1.565	12	-0.452	0.326	6058	0.832
ASTN2	1.262	16	0.315	0.624	9419	1.08	-6.878	18	-1.621	0.052	2064	0.416	1.062	11	0.32	0.626	9465	1.022
ASXL1	3.814	18	0.899	0.816	12192	1.091	-5.046	18	-1.189	0.117	3357	0.571	-2.441	12	-0.705	0.241	4975	0.748
ASXL2	-8.313	18	-1.959	0.025	1044	0.391	-0.507	18	-0.12	0.452	8224	0.901	1.87	12	0.54	0.705	10383	1.051
ASXL3	6.828	17	1.656	0.951	14557	1.066	-5.204	18	-1.227	0.11	3218	0.56	-3.531	10	-1.117	0.132	3379	0.604
ASZ1	6.697	18	1.578	0.943	14386	1.069	9.225	18	2.174	0.985	15679	1.029	0.458	12	0.132	0.553	8621	0.991
ATAD2	2.435	17	0.591	0.723	10796	1.092	2.892	18	0.682	0.752	12042	1.023	1.792	12	0.517	0.698	10300	1.047
ATAD2B	-1.138	18	-0.268	0.394	6480	0.992	-4.031	18	-0.95	0.171	4245	0.66	3.838	12	1.108	0.866	12464	1.075
ATAD3C	6.005	9	2.002	0.977	15195	1.049	3.268	9	1.089	0.862	13499	1.045	5.602	6	2.287	0.989	14662	1.043
ATAD5	-0.598	17	-0.145	0.442	7036	1.025	-2.84	18	-0.669	0.252	5457	0.755	-1.452	10	-0.459	0.323	6033	0.828
ATAT1	-7.5	18	-1.768	0.039	1351	0.465	-7.29	18	-1.718	0.043	1856	0.378	-5.49	12	-1.585	0.057	2000	0.437
ATCAY	4.519	17	1.096	0.863	12950	1.088	-3.277	17	-0.795	0.213	4867	0.718	-1.519	12	-0.438	0.331	6122	0.835
ATE1	-5.136	18	-1.211	0.113	2636	0.699	-1.721	18	-0.406	0.343	6716	0.835	-5.469	12	-1.579	0.057	2015	0.439
ATF2	0.723	18	0.17	0.568	8679	1.067	-5.704	18	-1.344	0.089	2835	0.516	5.532	12	1.597	0.945	13650	1.071
ATF3	-2.607	18	-0.615	0.269	4865	0.903	-0.059	18	-0.014	0.494	8752	0.925	-5.574	12	-1.609	0.054	1938	0.429
ATF5	3.422	18	0.807	0.79	11773	1.095	1.776	18	0.419	0.662	10878	0.997	5.515	11	1.663	0.952	13777	1.069
ATF6	-7.549	17	-1.831	0.034	1212	0.452	5.127	18	1.209	0.887	13861	1.047	6.325	12	1.826	0.966	14085	1.061
ATF6B	0.834	18	0.197	0.578	8822	1.068	-3.366	18	-0.793	0.214	4873	0.718	-4.64	12	-1.339	0.09	2684	0.52
ATF7	-17.166	13	-4.761	0	33	0	7.169	18	1.69	0.954	15020	1.04	-2.631	11	-0.793	0.214	4604	0.718
ATF7IP	-5.823	18	-1.372	0.085	2195	0.631	3.283	18	0.774	0.78	12409	1.03	-0.501	12	-0.145	0.442	7380	0.927
ATF7IP2	1.56	15	0.403	0.656	9868	1.085	-8.689	15	-2.243	0.012	978	0.208	-4.116	10	-1.302	0.097	2794	0.534
ATG10	0.524	9	0.175	0.569	8703	1.067	-1.426	9	-0.475	0.317	6367	0.816	2.374	6	0.969	0.834	12035	1.072
ATG12	-1.852	9	-0.617	0.269	4855	0.902	-0.587	9	-0.196	0.422	7831	0.883	4.021	6	1.642	0.95	13733	1.07
ATG13	-1.098	15	-0.284	0.388	6395	0.99	2.411	16	0.603	0.727	11715	1.015	-3.132	10	-0.99	0.161	3876	0.642
ATG14	-9.579	18	-2.258	0.012	686	0.285	-3.868	18	-0.912	0.181	4398	0.673	4.584	12	1.323	0.907	13042	1.076
ATG16L1	-0.888	18	-0.209	0.417	6742	1.009	-6.308	18	-1.487	0.069	2416	0.464	-3.819	12	-1.103	0.135	3432	0.609
ATG16L2	14.903	16	3.726	1	16242	1.004	-3.907	18	-0.921	0.179	4352	0.672	6.385	12	1.843	0.967	14104	1.061
ATG2A	6.39	15	1.65	0.951	14537	1.066	-11.117	18	-2.62	0.004	581	0.124	1.182	10	0.374	0.646	9712	1.028
ATG2B	0.382	18	0.09	0.536	8259	1.058	5.012	18	1.181	0.881	13780	1.047	13.585	12	3.922	1	15379	1.006
ATG3	-3.039	17	-0.737	0.231	4347	0.865	-0.136	18	-0.032	0.487	8667	0.92	-4.358	12	-1.258	0.104	2930	0.55
ATG4A	6.426	14	1.717	0.957	14706	1.061	-6.171	15	-1.593	0.056	2135	0.426	3.638	10	1.151	0.875	12593	1.075
ATG4B	-4.114	18	-0.97	0.166	3433	0.789	-5.9	18	-1.391	0.082	2693	0.5	4.214	12	1.216	0.888	12779	1.075
ATG4D	-1.728	15	-0.446	0.328	5579	0.958	-1.897	15	-0.49	0.312	6285	0.813	-0.115	10	-0.036	0.486	7863	0.955
ATG7	6.383	18	1.505	0.934	14183	1.074	-5.691	18	-1.341	0.09	2846	0.517	0.744	12	0.215	0.585	8992	1.006
ATG9A	-4.549	17	-1.103	0.135	2972	0.741	-1.903	18	-0.449	0.327	6492	0.824	1.506	12	0.435	0.668	9962	1.037
ATG9B	9.425	18	2.221	0.987	15488	1.039	-2.172	18	-0.512	0.304	6170	0.808	-1.396	12	-0.403	0.344	6281	0.846
ATHL1	1.685	18	0.397	0.654	9841	1.085	-7.604	18	-1.792	0.037	1718	0.348	-3.334	12	-0.962	0.168	3973	0.654
ATIC	3.572	18	0.842	0.8	11941	1.093	-2.552	18	-0.602	0.274	5777	0.776	10.926	12	3.154	0.999	15220	1.015
ATL1	-1.215	18	-0.286	0.387	6381	0.99	-0.547	18	-0.129	0.449	8169	0.899	-2.053	12	-0.593	0.277	5435	0.787
ATL2	-1.527	18	-0.36	0.359	6012	0.975	3.793	18	0.894	0.814	12815	1.04	-4.172	12	-1.204	0.114	3098	0.57
ATL3	-2.588	18	-0.61	0.271	4882	0.905	-12.315	17	-2.987	0.001	357	0.065	-4.289	11	-1.293	0.098	2819	0.538
ATM	-30.321	18	-7.147	0	12	0	-14.214	18	-3.35	0	232	0.028	-22.147	12	-6.393	0	3	0
ATN1	-4.447	15	-1.148	0.125	2828	0.723	8.601	15	2.221	0.987	15726	1.027	-0.26	9	-0.087	0.465	7639	0.942
ATOH1	-1.174	15	-0.303	0.381	6309	0.985	-6.125	15	-1.582	0.057	2166	0.43	3.389	10	1.072	0.858	12356	1.074
ATOH7	4.699	12	1.356	0.913	13790	1.079	-4.252	11	-1.282	0.1	3039	0.538	-3.483	8	-1.231	0.109	3007	0.561
ATOH8	-0.741	18	-0.175	0.431	6905	1.017	-0.707	17	-0.171	0.432	7959	0.888	-2.486	12	-0.718	0.236	4928	0.742
ATOX1	-3.298	9	-1.099	0.136	2989	0.741	-1.103	9	-0.368	0.357	6912	0.845	-2.756	6	-1.125	0.13	3353	0.601
ATP10A	12.893	18	3.039	0.999	16085	1.013	-2.747	18	-0.647	0.259	5561	0.761	3.564	12	1.029	0.848	12218	1.074
ATP10B	3.483	18	0.821	0.794	11848	1.093	0.464	18	0.109	0.544	9372	0.949	0.761	12	0.22	0.587	9021	1.006
ATP10D	-1.443	18	-0.34	0.367	6121	0.977	-7.91	18	-1.864	0.031	1559	0.327	6.544	12	1.889	0.971	14164	1.06
ATP11A	0.635	18	0.15	0.56	8568	1.065	1.6	18	0.377	0.647	10665	0.993	2.513	11	0.758	0.776	11264	1.065
ATP11B	3.111	18	0.733	0.768	11451	1.094	9.782	18	2.306	0.989	15820	1.024	-3.501	12	-1.011	0.156	3804	0.635
ATP11C	-3.75	17	-0.909	0.182	3675	0.806	-4.288	18	-1.011	0.156	4019	0.636	-4.746	12	-1.37	0.085	2599	0.508
ATP12A	5.401	18	1.273	0.899	13534	1.083	-6.936	18	-1.635	0.051	2033	0.411	4.145	12	1.197	0.884	12718	1.075
ATP13A1	2.252	16	0.563	0.713	10665	1.091	-3.778	17	-0.916	0.18	4374	0.673	-9.232	10	-2.919	0.002	315	0.086
ATP13A2	4.108	17	0.996	0.84	12593	1.089	-2.534	18	-0.597	0.275	5798	0.777	-2.177	12	-0.628	0.265	5277	0.776
ATP13A3	3.364	18	0.793	0.786	11702	1.096	-5.81	18	-1.369	0.085	2770	0.505	-12.729	12	-3.675	0	108	0.017
ATP13A4	1.508	18	0.356	0.639	9605	1.085	5.276	18	1.244	0.893	13955	1.048	-3.753	12	-1.083	0.139	3515	0.613
ATP13A5	4.025	18	0.949	0.829	12387	1.091	2.265	18	0.534	0.703	11410	1.009	7.636	12	2.204	0.986	14568	1.047
ATP1A1	2.019	12	0.583	0.72	10763	1.091	4.603	14	1.23	0.891	13929	1.047	0.304	11	0.092	0.536	8454	0.982
ATP1A2	6.945	18	1.637	0.949	14501	1.068	-4.624	18	-1.09	0.138	3736	0.604	-0.942	12	-0.272	0.393	6855	0.886
ATP1A3	3.353	18	0.79	0.785	11691	1.096	2.439	18	0.575	0.717	11593	1.013	1.651	12	0.477	0.683	10135	1.043
ATP1A4	-6.759	17	-1.639	0.051	1595	0.517	2.203	18	0.519	0.698	11344	1.008	-4.029	12	-1.163	0.122	3219	0.588
ATP1B1	3.05	18	0.719	0.764	11389	1.094	1.375	18	0.324	0.627	10427	0.984	-0.322	12	-0.093	0.463	7611	0.941
ATP1B2	1.812	18	0.427	0.665	9980	1.087	2.621	18	0.618	0.732	11774	1.017	-0.595	12	-0.172	0.432	7262	0.92
ATP1B4	1.387	15	0.358	0.64	9624	1.084	2.905	15	0.75	0.773	12313	1.028	-2.986	10	-0.944	0.173	4050	0.659
ATP2A1	-8.205	17	-1.99	0.023	989	0.384	-1.071	18	-0.252	0.4	7510	0.873	0.379	12	0.11	0.544	8532	0.985
ATP2A2	-0.03	12	-0.009	0.497	7751	1.045	-3.326	12	-0.96	0.169	4212	0.655	-7.254	8	-2.565	0.005	540	0.148
ATP2A3	1.437	18	0.339	0.633	9528	1.083	-6.419	18	-1.513	0.065	2335	0.457	-8.002	12	-2.31	0.01	740	0.218
ATP2B1	8.754	18	2.063	0.98	15284	1.046	-5.329	18	-1.256	0.105	3130	0.547	5.033	12	1.453	0.927	13345	1.074
ATP2B2	-0.101	18	-0.024	0.491	7667	1.044	5.161	18	1.216	0.888	13893	1.046	-1.288	12	-0.372	0.355	6426	0.855
ATP2B3	5.968	18	1.407	0.92	13919	1.078	-2.284	18	-0.538	0.295	6057	0.798	-0.173	12	-0.05	0.48	7801	0.952
ATP2B4	-6.659	18	-1.569	0.058	1748	0.544	-1.647	18	-0.388	0.349	6803	0.84	-2.362	11	-0.712	0.238	4953	0.744
ATP2C1	6.99	18	1.648	0.95	14530	1.067	5.292	18	1.247	0.894	13968	1.048	1.189	12	0.343	0.634	9577	1.024
ATP2C2	-0.517	18	-0.122	0.452	7151	1.03	11.849	18	2.793	0.997	16135	1.012	3.192	12	0.922	0.822	11864	1.071
ATP4A	-11.716	18	-2.762	0.003	317	0.148	0.331	18	0.078	0.531	9223	0.943	1.038	12	0.3	0.618	9391	1.018
ATP4B	-3.299	18	-0.778	0.218	4173	0.854	-0.773	18	-0.182	0.428	7903	0.886	-5.582	12	-1.611	0.054	1935	0.428
ATP5A1	-1.507	7	-0.569	0.285	5048	0.919	7.908	12	2.283	0.989	15789	1.025	4.237	8	1.498	0.933	13453	1.073
ATP5B	-6.718	11	-2.025	0.021	944	0.37	7.855	15	2.028	0.979	15516	1.033	9.485	10	2.999	0.999	15159	1.019
ATP5D	0.018	12	0.005	0.502	7824	1.047	-0.983	18	-0.232	0.408	7619	0.877	10.107	12	2.918	0.998	15134	1.02
ATP5F1	6.453	9	2.151	0.984	15405	1.042	9.014	9	3.005	0.999	16210	1.009	-4.669	6	-1.906	0.028	1352	0.324
ATP5G3	7.972	18	1.879	0.97	15016	1.053	-4.027	18	-0.949	0.171	4250	0.66	1.615	12	0.466	0.679	10102	1.04
ATP5S	7.114	15	1.837	0.967	14927	1.056	0.888	15	0.229	0.591	9961	0.971	2.239	10	0.708	0.761	11064	1.063
ATP5SL	-3.812	18	-0.899	0.184	3719	0.809	-3.632	18	-0.856	0.196	4612	0.696	-12.291	12	-3.548	0	131	0.023
ATP6AP1	-5.449	18	-1.284	0.099	2424	0.669	1.406	18	0.331	0.63	10467	0.985	2.775	12	0.801	0.788	11413	1.068
ATP6AP1L	3.712	18	0.875	0.809	12077	1.093	-7.902	18	-1.863	0.031	1565	0.327	0.348	12	0.1	0.54	8498	0.983
ATP6AP2	3.771	12	1.089	0.862	12909	1.089	-1.332	12	-0.384	0.35	6826	0.84	-3.153	8	-1.115	0.132	3389	0.604
ATP6V0A1	1.768	18	0.417	0.662	9938	1.086	5.151	18	1.214	0.888	13886	1.046	4.718	12	1.362	0.913	13138	1.075
ATP6V0A2	4.026	18	0.949	0.829	12390	1.091	7.131	18	1.681	0.954	15008	1.04	-2.384	12	-0.688	0.246	5048	0.753
ATP6V0A4	-3.449	18	-0.813	0.208	4040	0.84	0.252	18	0.059	0.524	9122	0.94	3.224	12	0.931	0.824	11899	1.071
ATP6V0B	3.675	16	0.919	0.821	12267	1.091	-11.033	16	-2.758	0.003	489	0.097	-3.242	12	-0.936	0.175	4079	0.662
ATP6V0D1	-0.445	15	-0.115	0.454	7195	1.03	7.932	18	1.87	0.969	15310	1.036	-4.81	11	-1.45	0.073	2362	0.481
ATP6V0D2	-0.493	18	-0.116	0.454	7185	1.03	-3.476	17	-0.843	0.2	4676	0.699	-5.418	12	-1.564	0.059	2037	0.447
ATP6V0E2	-6.068	18	-1.43	0.076	2050	0.607	-16.603	18	-3.913	0	117	0.006	2.479	12	0.716	0.763	11093	1.064
ATP6V1A	-7.074	15	-1.827	0.034	1218	0.454	7.284	15	1.881	0.97	15325	1.036	8.104	9	2.701	0.997	15012	1.027
ATP6V1B1	6.942	17	1.684	0.954	14631	1.063	-1.401	18	-0.33	0.371	7111	0.853	-1.368	12	-0.395	0.346	6325	0.847
ATP6V1B2	-5.347	15	-1.381	0.084	2167	0.63	-8.323	17	-2.019	0.022	1293	0.276	4.25	11	1.282	0.9	12946	1.075
ATP6V1C1	-3.888	9	-1.296	0.097	2394	0.664	-1.617	11	-0.488	0.313	6305	0.813	-4.554	7	-1.721	0.043	1703	0.387
ATP6V1C2	3.857	17	0.936	0.825	12334	1.091	-1.982	18	-0.467	0.32	6409	0.818	-3.868	12	-1.117	0.132	3381	0.604
ATP6V1E2	-8.288	12	-2.392	0.008	550	0.248	-0.189	12	-0.055	0.478	8578	0.913	2.842	8	1.005	0.842	12159	1.072
ATP6V1F	4.133	9	1.378	0.916	13851	1.078	1.39	9	0.463	0.678	11072	1.003	-2.337	6	-0.954	0.17	4015	0.655
ATP6V1G1	-4.412	9	-1.471	0.071	1967	0.586	-1.042	9	-0.347	0.364	7023	0.849	1.048	6	0.428	0.666	9940	1.036
ATP6V1G2	4.354	18	1.026	0.848	12681	1.09	-0.295	18	-0.069	0.472	8503	0.909	7.663	12	2.212	0.987	14572	1.047
ATP6V1G3	1.334	9	0.445	0.672	10066	1.088	-2.247	9	-0.749	0.227	5096	0.729	-1.107	6	-0.452	0.326	6057	0.832
ATP6V1H	5.341	15	1.379	0.916	13853	1.079	-3.86	14	-1.032	0.151	3950	0.626	-4.8	8	-1.697	0.045	1758	0.394
ATP7A	3.219	18	0.759	0.776	11562	1.095	2.413	18	0.569	0.715	11561	1.013	-7.204	12	-2.08	0.019	1027	0.283
ATP7B	13.651	18	3.218	0.999	16137	1.01	-1.843	18	-0.434	0.332	6561	0.828	-10.103	12	-2.916	0.002	317	0.086
ATP8A1	-4.021	18	-0.948	0.172	3524	0.794	-10.013	18	-2.36	0.009	816	0.183	-5.54	12	-1.599	0.055	1962	0.433
ATP8A2	-0.023	18	-0.006	0.498	7767	1.045	-0.27	18	-0.064	0.475	8527	0.911	-3.27	12	-0.944	0.173	4051	0.659
ATP8B1	-5.923	18	-1.396	0.081	2133	0.622	-4.706	18	-1.109	0.134	3655	0.599	7.135	12	2.06	0.98	14409	1.052
ATP8B2	-4.063	18	-0.958	0.169	3478	0.793	-4.136	18	-0.975	0.165	4163	0.648	7.76	12	2.24	0.987	14613	1.045
ATP8B3	1.364	18	0.322	0.626	9449	1.081	-8.596	18	-2.026	0.021	1285	0.272	6.768	12	1.954	0.975	14251	1.058
ATP8B4	-1.395	17	-0.338	0.368	6134	0.977	-4.962	18	-1.169	0.121	3429	0.578	-2.095	12	-0.605	0.273	5382	0.784
ATP9A	0.623	18	0.147	0.558	8551	1.065	2.339	18	0.551	0.709	11484	1.011	2.708	12	0.782	0.783	11343	1.067
ATP9B	-5.307	18	-1.251	0.105	2535	0.679	-6.26	18	-1.475	0.07	2449	0.468	3.449	12	0.996	0.84	12126	1.072
ATPAF1	-4.211	18	-0.993	0.16	3353	0.781	-4.944	18	-1.165	0.122	3443	0.58	-5.735	12	-1.656	0.049	1833	0.413
ATPAF2	-5.451	18	-1.285	0.099	2423	0.669	-8.045	17	-1.951	0.026	1408	0.297	-6.375	11	-1.922	0.027	1311	0.322
ATPIF1	-4.24	9	-1.413	0.079	2086	0.616	-4.845	9	-1.615	0.053	2083	0.418	-4.12	6	-1.682	0.046	1787	0.401
ATR	-13.957	13	-3.871	0	75	0.012	-11.152	13	-3.093	0.001	311	0.052	-4.366	9	-1.455	0.073	2349	0.479
ATRAID	8.418	18	1.984	0.976	15166	1.05	-0.987	18	-0.233	0.408	7612	0.877	-0.577	12	-0.167	0.434	7287	0.921
ATRIP	-0.899	17	-0.218	0.414	6709	1.006	-25.222	18	-5.945	0	27	0	-5.135	11	-1.548	0.061	2077	0.453
ATRN	-1.121	18	-0.264	0.396	6501	0.993	4.981	18	1.174	0.88	13760	1.047	1.591	11	0.48	0.684	10149	1.043
ATRNL1	16.576	16	4.144	1	16284	1.002	-6.655	18	-1.569	0.058	2199	0.435	0.453	12	0.131	0.552	8615	0.991
ATRX	0.875	18	0.206	0.582	8881	1.068	2.237	18	0.527	0.701	11378	1.009	-8.715	11	-2.628	0.004	499	0.133
ATXN1	-3.991	18	-0.941	0.173	3559	0.795	-4.19	18	-0.988	0.162	4117	0.643	-7.824	12	-2.259	0.012	790	0.234
ATXN10	-4.283	18	-1.009	0.156	3296	0.774	8.661	18	2.041	0.979	15528	1.033	-3.308	12	-0.955	0.17	4006	0.656
ATXN1L	-4.406	18	-1.039	0.15	3200	0.762	12.775	18	3.011	0.999	16213	1.008	0.037	12	0.011	0.504	8062	0.967
ATXN2	0.338	18	0.08	0.532	8207	1.057	-1.55	18	-0.365	0.357	6922	0.845	7.797	12	2.251	0.988	14626	1.045
ATXN2L	1.983	18	0.467	0.68	10201	1.087	-1.8	18	-0.424	0.336	6620	0.83	-12.485	11	-3.764	0	91	0.014
ATXN3	-2.396	15	-0.619	0.268	4849	0.902	2.379	15	0.614	0.73	11760	1.017	4.741	10	1.499	0.933	13457	1.072
ATXN7	1.163	18	0.274	0.608	9200	1.078	1.037	18	0.245	0.597	10036	0.973	-3.965	12	-1.145	0.126	3282	0.595
ATXN7L1	-3.167	18	-0.746	0.228	4304	0.863	4.402	18	1.037	0.85	13336	1.044	-6.056	12	-1.748	0.04	1639	0.379
ATXN7L2	0.208	18	0.049	0.52	8047	1.053	6.828	17	1.656	0.951	14955	1.041	-2.743	11	-0.827	0.204	4474	0.706
ATXN7L3	-3.703	18	-0.873	0.191	3831	0.815	-1.176	18	-0.277	0.391	7396	0.865	-9.556	12	-2.759	0.003	401	0.112
ATXN7L3B	-2.059	12	-0.594	0.276	4957	0.909	1.804	12	0.521	0.699	11348	1.008	4.188	8	1.481	0.931	13415	1.073
AUH	-1.783	15	-0.46	0.323	5517	0.954	8.795	15	2.271	0.988	15777	1.026	-1.2	10	-0.38	0.352	6387	0.853
AUNIP	-11.731	15	-3.029	0.001	214	0.094	-29.904	15	-7.721	0	10	0	-10.268	10	-3.247	0.001	204	0.044
AUP1	-1.084	17	-0.263	0.396	6507	0.993	4.134	18	0.974	0.835	13120	1.042	-0.285	11	-0.086	0.466	7642	0.943
AURKAIP1	-0.936	9	-0.312	0.378	6269	0.982	-0.446	12	-0.129	0.449	8172	0.899	7.099	8	2.51	0.994	14880	1.033
AURKB	-3.313	14	-0.886	0.188	3783	0.81	-7.878	15	-2.034	0.021	1275	0.269	2.293	8	0.811	0.791	11450	1.069
AURKC	-9.517	16	-2.379	0.009	566	0.25	4.773	18	1.125	0.87	13612	1.046	0.105	11	0.032	0.513	8161	0.972
AUTS2	5.38	18	1.268	0.898	13521	1.083	10.018	18	2.361	0.991	15865	1.022	-2.514	12	-0.726	0.234	4889	0.74
AVEN	4.884	17	1.185	0.882	13281	1.083	-7.675	18	-1.809	0.035	1682	0.343	-3.749	11	-1.13	0.129	3335	0.599
AVIL	11.505	18	2.712	0.997	15916	1.021	2.861	18	0.674	0.75	12017	1.022	1.349	11	0.407	0.658	9860	1.032
AVL9	11.339	18	2.673	0.996	15896	1.022	-3.303	18	-0.778	0.218	4955	0.721	-10.586	12	-3.056	0.001	260	0.067
AVP	1.318	12	0.38	0.648	9738	1.086	-0.623	12	-0.18	0.429	7918	0.886	1.624	8	0.574	0.717	10518	1.055
AVPI1	-4.265	15	-1.101	0.135	2983	0.74	0.369	15	0.095	0.538	9311	0.946	0.602	10	0.19	0.575	8876	1.003
AVPR1A	-2.772	15	-0.716	0.237	4429	0.873	-2.535	15	-0.655	0.256	5516	0.761	-1.622	10	-0.513	0.304	5772	0.815
AVPR1B	-5.433	18	-1.281	0.1	2437	0.67	0.563	18	0.133	0.553	9490	0.953	5.108	12	1.475	0.93	13395	1.074
AVPR2	-3.535	15	-0.913	0.181	3666	0.804	4.227	15	1.091	0.862	13506	1.045	6.491	9	2.164	0.985	14527	1.048
AWAT1	4.627	18	1.091	0.862	12922	1.088	1.621	18	0.382	0.649	10694	0.993	4.313	11	1.301	0.903	12997	1.075
AWAT2	-8.898	17	-2.158	0.015	775	0.325	-1.992	16	-0.498	0.309	6240	0.811	1.088	11	0.328	0.629	9499	1.023
AXDND1	1.512	18	0.356	0.639	9612	1.085	-13.698	17	-3.322	0	244	0.03	-1.971	12	-0.569	0.285	5544	0.794
AXIN1	-6.985	18	-1.646	0.05	1577	0.515	-4.936	18	-1.163	0.122	3455	0.58	5.341	12	1.542	0.938	13547	1.071
AXIN2	2.231	18	0.526	0.701	10477	1.091	2.991	18	0.705	0.76	12134	1.025	7.215	12	2.083	0.981	14431	1.052
AXL	1.256	18	0.296	0.616	9327	1.078	-3.147	18	-0.742	0.229	5134	0.73	-0.843	12	-0.243	0.404	6977	0.895
AZGP1	1.828	12	0.528	0.701	10487	1.09	4.134	12	1.193	0.884	13810	1.047	1.628	8	0.576	0.718	10523	1.055
AZI1	-3.661	18	-0.863	0.194	3866	0.819	8.874	18	2.092	0.982	15594	1.031	8.601	12	2.483	0.993	14861	1.034
AZIN1	2.045	9	0.682	0.752	11227	1.093	5.202	9	1.734	0.959	15090	1.04	-1.274	6	-0.52	0.301	5746	0.811
AZU1	3.98	18	0.938	0.826	12349	1.091	-8.889	18	-2.095	0.018	1176	0.252	-6.662	11	-2.009	0.022	1146	0.301
B2M	-0.139	9	-0.046	0.482	7549	1.04	-5.162	9	-1.721	0.043	1853	0.377	-0.733	6	-0.299	0.382	6732	0.879
B3GALNT2	6.092	16	1.523	0.936	14241	1.072	-5.596	18	-1.319	0.094	2915	0.526	-7.549	12	-2.179	0.015	892	0.254
B3GALT1	2.386	12	0.689	0.755	11257	1.093	-0.556	12	-0.161	0.436	8005	0.892	-3.686	8	-1.303	0.096	2785	0.535
B3GALT2	-1.695	12	-0.489	0.312	5404	0.942	4.797	12	1.385	0.917	14360	1.045	-0.165	8	-0.058	0.477	7773	0.949
B3GALT4	-3.543	15	-0.915	0.18	3660	0.803	-0.708	15	-0.183	0.427	7896	0.886	9.426	10	2.981	0.999	15153	1.019
B3GALT5	2.237	12	0.646	0.741	11051	1.093	3.243	12	0.936	0.825	12976	1.041	0.3	8	0.106	0.542	8514	0.985
B3GALT6	13.102	12	3.782	1	16254	1.003	-3.834	12	-1.107	0.134	3663	0.6	4.101	8	1.45	0.926	13339	1.074
B3GALTL	4.222	18	0.995	0.84	12587	1.089	-2.519	18	-0.594	0.276	5813	0.778	4.194	12	1.211	0.887	12758	1.075
B3GAT1	-3.259	18	-0.768	0.221	4214	0.856	3.315	18	0.781	0.783	12435	1.03	-0.288	12	-0.083	0.467	7656	0.943
B3GAT2	2.318	18	0.546	0.708	10575	1.091	-4.541	18	-1.07	0.142	3805	0.612	-9.091	12	-2.624	0.004	502	0.134
B3GNT1	-4.871	18	-1.148	0.125	2829	0.723	-3.203	18	-0.755	0.225	5066	0.727	-4.524	12	-1.306	0.096	2771	0.535
B3GNT2	5.554	9	1.851	0.968	14966	1.055	-5.289	9	-1.763	0.039	1774	0.359	-4.454	6	-1.818	0.035	1498	0.356
B3GNT3	1.398	18	0.33	0.629	9487	1.082	3.249	18	0.766	0.778	12376	1.029	-1.268	12	-0.366	0.357	6455	0.856
B3GNT4	8.951	15	2.311	0.99	15610	1.034	-0.809	15	-0.209	0.417	7750	0.881	0.278	10	0.088	0.535	8428	0.982
B3GNT6	-8.424	17	-2.043	0.021	917	0.365	-7.683	18	-1.811	0.035	1677	0.342	3.762	11	1.134	0.872	12539	1.075
B3GNT7	-1.247	18	-0.294	0.384	6350	0.987	0.537	18	0.126	0.55	9465	0.952	-1.009	12	-0.291	0.385	6758	0.882
B3GNT8	5.842	18	1.377	0.916	13849	1.078	-0.909	18	-0.214	0.415	7715	0.881	20.051	12	5.788	1	15458	1.001
B3GNT9	-4.928	12	-1.423	0.077	2066	0.611	-6.114	12	-1.765	0.039	1769	0.359	-0.337	8	-0.119	0.453	7494	0.934
B3GNTL1	-2.37	13	-0.657	0.255	4678	0.891	8.086	13	2.243	0.988	15749	1.026	-4.126	10	-1.305	0.096	2778	0.535
B4GALNT1	-2.819	18	-0.664	0.253	4640	0.89	-10.897	17	-2.643	0.004	569	0.118	-0.178	12	-0.051	0.48	7797	0.951
B4GALNT2	-1.557	16	-0.389	0.349	5872	0.968	9.458	18	2.229	0.987	15735	1.027	0.844	12	0.244	0.596	9147	1.008
B4GALNT3	-13.84	18	-3.262	0.001	156	0.058	3.81	18	0.898	0.815	12836	1.04	-4.761	12	-1.374	0.085	2585	0.506
B4GALNT4	2.114	15	0.546	0.707	10572	1.091	-6.041	15	-1.56	0.059	2222	0.438	3.324	9	1.108	0.866	12463	1.075
B4GALT1	-3.689	18	-0.87	0.192	3848	0.815	6.817	18	1.607	0.946	14842	1.043	-1.744	12	-0.503	0.307	5819	0.817
B4GALT2	-7.166	18	-1.689	0.046	1499	0.496	-1.125	18	-0.265	0.395	7456	0.868	-1.825	11	-0.55	0.291	5622	0.801
B4GALT3	7.086	18	1.67	0.953	14594	1.065	9.824	18	2.316	0.99	15828	1.024	-4.403	12	-1.271	0.102	2895	0.544
B4GALT5	-0.498	18	-0.117	0.453	7175	1.03	-1.308	18	-0.308	0.379	7223	0.859	5.553	12	1.603	0.946	13667	1.07
B4GALT6	0.686	15	0.177	0.57	8724	1.066	-2.115	15	-0.546	0.293	6015	0.796	-3.595	10	-1.137	0.128	3315	0.596
B4GALT7	9.734	18	2.294	0.989	15591	1.035	4.865	18	1.147	0.874	13681	1.046	0.373	12	0.108	0.543	8524	0.985
B9D1	-11.461	18	-2.701	0.003	339	0.166	-0.44	18	-0.104	0.459	8307	0.904	-2.786	12	-0.804	0.211	4563	0.714
B9D2	-0.462	18	-0.109	0.457	7225	1.031	6.734	18	1.587	0.944	14805	1.044	1.587	12	0.458	0.677	10060	1.04
BAALC	4.166	18	0.982	0.837	12544	1.088	0.842	18	0.198	0.579	9817	0.965	4.764	12	1.375	0.915	13179	1.074
BAAT	5.409	18	1.275	0.899	13540	1.083	-3.754	18	-0.885	0.188	4501	0.684	-1.92	11	-0.579	0.281	5494	0.792
BABAM1	5.988	18	1.411	0.921	13935	1.078	9.346	18	2.203	0.986	15713	1.027	8.828	12	2.549	0.995	14913	1.032
BACE1	3.68	17	0.893	0.814	12163	1.091	5.116	17	1.241	0.893	13949	1.048	2.949	10	0.932	0.824	11907	1.071
BACE2	-3.818	18	-0.9	0.184	3710	0.809	2.359	18	0.556	0.711	11504	1.012	-4.408	12	-1.273	0.102	2886	0.544
BACH1	-0.28	18	-0.066	0.474	7453	1.037	-2.553	18	-0.602	0.274	5776	0.776	-6.215	11	-1.874	0.03	1408	0.335
BACH2	-0.793	17	-0.192	0.424	6816	1.014	4.67	17	1.133	0.871	13639	1.046	6.301	11	1.9	0.971	14175	1.06
BAD	7.26	14	1.94	0.974	15110	1.051	-11.087	18	-2.613	0.004	589	0.125	4.591	12	1.325	0.907	13046	1.076
BAG1	4.854	18	1.144	0.874	13123	1.086	7.221	18	1.702	0.956	15043	1.04	-2.059	12	-0.595	0.276	5428	0.787
BAG2	2.187	12	0.631	0.736	10985	1.093	3.61	12	1.042	0.851	13353	1.044	-1.157	8	-0.409	0.341	6258	0.843
BAG3	9.34	18	2.201	0.986	15462	1.04	-3.964	18	-0.934	0.175	4305	0.666	-0.05	12	-0.014	0.494	7960	0.96
BAG4	6.22	9	2.073	0.981	15296	1.046	3.445	9	1.148	0.875	13690	1.046	-2.054	6	-0.839	0.201	4429	0.701
BAG5	-2.005	15	-0.518	0.302	5267	0.936	-0.891	15	-0.23	0.409	7628	0.878	2.839	10	0.898	0.815	11762	1.072
BAG6	1.914	17	0.464	0.679	10178	1.088	-3.729	17	-0.905	0.183	4429	0.676	4.628	12	1.336	0.909	13070	1.076
BAHCC1	-1.832	18	-0.432	0.333	5664	0.959	-5.508	17	-1.336	0.091	2864	0.519	-2.665	12	-0.769	0.221	4709	0.725
BAHD1	8.612	18	2.03	0.979	15242	1.047	8.367	18	1.972	0.976	15445	1.034	0.514	12	0.148	0.559	8697	0.994
BAI1	3.212	18	0.757	0.776	11559	1.094	-1.839	18	-0.434	0.332	6563	0.829	13.464	12	3.887	1	15371	1.006
BAI2	4.208	18	0.992	0.839	12577	1.088	-5.836	18	-1.376	0.084	2744	0.504	2.33	12	0.673	0.749	10926	1.061
BAI3	0.593	17	0.144	0.557	8537	1.064	-2.168	18	-0.511	0.305	6177	0.807	-1.152	12	-0.333	0.37	6595	0.867
BAIAP2	1.589	18	0.374	0.646	9698	1.086	0.234	17	0.057	0.523	9108	0.939	-0.26	11	-0.078	0.469	7687	0.943
BAIAP2L1	-5.606	18	-1.321	0.093	2329	0.653	2.851	18	0.672	0.749	12010	1.021	0.81	12	0.234	0.592	9089	1.008
BAIAP2L2	2.834	18	0.668	0.748	11161	1.093	-7.639	18	-1.801	0.036	1699	0.346	4.672	12	1.349	0.911	13107	1.075
BAIAP3	-4.042	18	-0.953	0.17	3506	0.793	-2.132	18	-0.502	0.308	6222	0.809	-6.412	12	-1.851	0.032	1444	0.344
BAMBI	-1.959	9	-0.653	0.257	4700	0.891	2.29	9	0.763	0.777	12364	1.029	1.114	6	0.455	0.675	10050	1.039
BANK1	0.058	18	0.014	0.505	7874	1.047	7.388	18	1.741	0.959	15105	1.04	1.281	12	0.37	0.644	9693	1.028
BANP	4.529	17	1.098	0.864	12957	1.088	0.524	16	0.131	0.552	9485	0.953	-0.285	12	-0.082	0.467	7661	0.943
BAP1	3.713	16	0.928	0.823	12311	1.091	-3.05	17	-0.74	0.23	5140	0.732	2.406	9	0.802	0.789	11420	1.068
BARD1	-27.651	16	-6.913	0	14	0	-12.339	16	-3.085	0.001	315	0.053	-10.738	10	-3.396	0	164	0.032
BARHL1	-7.33	18	-1.728	0.042	1419	0.483	5.467	18	1.289	0.901	14071	1.048	14.859	12	4.289	1	15413	1.003
BARHL2	4.442	18	1.047	0.852	12767	1.089	-1.084	18	-0.256	0.399	7500	0.871	-2.882	12	-0.832	0.203	4457	0.703
BARX1	-10.626	18	-2.505	0.006	465	0.215	-4.888	18	-1.152	0.125	3488	0.585	10.742	12	3.101	0.999	15199	1.017
BARX2	-3.507	18	-0.826	0.204	3986	0.836	-5.734	18	-1.352	0.088	2817	0.513	-2.649	12	-0.765	0.222	4734	0.726
BASP1	-5.545	9	-1.848	0.032	1186	0.444	-0.552	9	-0.184	0.427	7889	0.886	0.65	6	0.265	0.605	9239	1.012
BATF	-0.384	13	-0.106	0.458	7234	1.032	2.267	15	0.585	0.721	11642	1.014	6.453	10	2.041	0.979	14379	1.053
BATF2	3.743	15	0.967	0.833	12473	1.089	-0.442	15	-0.114	0.455	8260	0.901	-5.939	10	-1.878	0.03	1400	0.333
BAX	-5.133	18	-1.21	0.113	2639	0.699	-6.278	18	-1.48	0.069	2431	0.468	-3.742	12	-1.08	0.14	3528	0.614
BAZ1A	-1.388	18	-0.327	0.372	6179	0.981	-5.877	18	-1.385	0.083	2710	0.501	-10.113	12	-2.919	0.002	314	0.086
BAZ1B	5.518	18	1.301	0.903	13612	1.082	-3.023	18	-0.712	0.238	5259	0.741	3.245	12	0.937	0.826	11920	1.071
BAZ2A	-2.811	18	-0.663	0.254	4648	0.89	2.099	18	0.495	0.69	11229	1.005	-5.572	12	-1.609	0.054	1939	0.43
BAZ2B	3.184	18	0.751	0.774	11530	1.094	-11.425	18	-2.693	0.004	528	0.11	-5.585	12	-1.612	0.053	1934	0.427
BBC3	-8.266	18	-1.948	0.026	1065	0.393	-9.539	18	-2.248	0.012	969	0.207	-7.2	11	-2.171	0.015	900	0.257
BBIP1	0.267	9	0.089	0.536	8257	1.058	-4.899	9	-1.633	0.051	2039	0.411	-5.597	6	-2.285	0.011	760	0.227
BBOX1	3.37	18	0.794	0.786	11710	1.095	-3.097	18	-0.73	0.233	5186	0.735	0.406	12	0.117	0.547	8562	0.987
BBS1	-2.154	16	-0.538	0.295	5182	0.929	0.353	18	0.083	0.533	9251	0.943	-3.958	11	-1.193	0.116	3140	0.573
BBS10	-0.429	18	-0.101	0.46	7261	1.033	0.508	18	0.12	0.548	9430	0.951	-1.747	12	-0.504	0.307	5814	0.817
BBS12	-3.148	9	-1.049	0.147	3155	0.76	0.004	9	0.001	0.501	8842	0.927	-0.233	6	-0.095	0.462	7603	0.94
BBS2	-2.956	18	-0.697	0.243	4504	0.88	-2.412	18	-0.569	0.285	5915	0.788	-5.281	12	-1.525	0.064	2135	0.461
BBS4	1.287	18	0.303	0.619	9362	1.079	6.418	18	1.513	0.935	14663	1.044	-3.995	11	-1.205	0.114	3095	0.571
BBS5	8.625	18	2.033	0.979	15245	1.047	-2.854	18	-0.673	0.251	5430	0.755	5.017	12	1.448	0.926	13333	1.074
BBS7	-4.055	18	-0.956	0.17	3491	0.792	3.114	18	0.734	0.769	12239	1.028	1.382	12	0.399	0.655	9831	1.031
BBS9	5.042	18	1.188	0.883	13297	1.083	-4.562	18	-1.075	0.141	3788	0.61	-3.97	12	-1.146	0.126	3277	0.594
BBX	-2.899	18	-0.683	0.247	4560	0.884	-3.367	18	-0.794	0.214	4872	0.718	6.115	12	1.765	0.961	13970	1.064
BCAM	-3.217	16	-0.804	0.211	4080	0.842	-1.904	18	-0.449	0.327	6491	0.824	-1.597	11	-0.481	0.315	5922	0.823
BCAN	5.618	17	1.363	0.913	13809	1.079	-3.835	16	-0.959	0.169	4217	0.655	6.447	12	1.861	0.969	14122	1.061
BCAP31	2.477	15	0.64	0.739	11021	1.093	-1.251	15	-0.323	0.373	7143	0.856	3.348	9	1.116	0.868	12490	1.075
BCAR1	-4.63	18	-1.091	0.138	3013	0.745	0.748	18	0.176	0.57	9705	0.961	2.002	12	0.578	0.718	10533	1.055
BCAR3	4.7	16	1.175	0.88	13251	1.083	-2.055	18	-0.484	0.314	6316	0.814	2.456	11	0.741	0.771	11190	1.065
BCAS1	-1.438	18	-0.339	0.367	6129	0.977	-11.106	18	-2.618	0.004	585	0.124	3.552	12	1.025	0.847	12207	1.074
BCAS3	-4.616	18	-1.088	0.138	3025	0.746	0.327	18	0.077	0.531	9219	0.942	-2.644	12	-0.763	0.223	4743	0.726
BCAS4	-1.136	18	-0.268	0.394	6484	0.992	-0.229	18	-0.054	0.478	8580	0.913	-7.523	12	-2.172	0.015	899	0.257
BCAT1	-3.789	18	-0.893	0.186	3740	0.811	10.954	18	2.582	0.995	16025	1.017	3.963	12	1.144	0.874	12579	1.074
BCAT2	4.34	18	1.023	0.847	12673	1.09	3.104	18	0.732	0.768	12227	1.028	7.215	12	2.083	0.981	14432	1.052
BCCIP	7.687	18	1.812	0.965	14887	1.057	1.209	16	0.302	0.619	10313	0.982	2.317	11	0.699	0.758	11029	1.062
BCDIN3D	-1.546	16	-0.386	0.35	5886	0.969	-0.091	17	-0.022	0.491	8711	0.923	-0.725	11	-0.219	0.413	7081	0.903
BCHE	-0.681	9	-0.227	0.41	6672	1.003	8.49	9	2.83	0.998	16151	1.011	-2.252	6	-0.919	0.179	4126	0.671
BCKDHA	-0.1	18	-0.024	0.491	7669	1.043	7.941	18	1.872	0.969	15312	1.036	10.749	12	3.103	0.999	15200	1.017
BCKDHB	-9.435	16	-2.359	0.009	589	0.254	-3.214	17	-0.779	0.218	4950	0.72	3.75	11	1.131	0.871	12533	1.075
BCKDK	5.929	17	1.438	0.925	14005	1.077	-3.752	18	-0.884	0.188	4504	0.684	-4.576	12	-1.321	0.093	2740	0.526
BCL10	-3.323	12	-0.959	0.169	3469	0.793	-1.26	12	-0.364	0.358	6929	0.846	2.781	8	0.983	0.837	12083	1.072
BCL11A	0.606	18	0.143	0.557	8530	1.065	-2.504	18	-0.59	0.278	5826	0.78	1.67	12	0.482	0.685	10161	1.043
BCL11B	-0.222	18	-0.052	0.479	7521	1.039	5.899	18	1.39	0.918	14370	1.046	-2.303	12	-0.665	0.253	5148	0.761
BCL2	-4.752	18	-1.12	0.131	2917	0.734	-2.789	17	-0.676	0.249	5412	0.754	-0.515	12	-0.149	0.441	7357	0.927
BCL2L1	1.089	18	0.257	0.601	9129	1.074	1.503	17	0.365	0.642	10605	0.991	-6.627	12	-1.913	0.028	1335	0.323
BCL2L10	3.731	15	0.963	0.832	12460	1.09	-2.496	15	-0.644	0.26	5577	0.762	-0.393	10	-0.124	0.451	7471	0.933
BCL2L11	0.269	11	0.081	0.532	8212	1.057	-6.33	12	-1.827	0.034	1643	0.337	0.992	8	0.351	0.637	9608	1.026
BCL2L12	3.788	18	0.893	0.814	12165	1.091	-0.297	18	-0.07	0.472	8499	0.909	3.226	12	0.931	0.824	11902	1.071
BCL2L13	-4.958	18	-1.169	0.121	2759	0.717	1.746	18	0.411	0.66	10840	0.996	9.238	11	2.785	0.997	15061	1.024
BCL2L14	-3.986	18	-0.939	0.174	3565	0.795	-1.036	18	-0.244	0.404	7551	0.875	-6.937	12	-2.002	0.023	1161	0.301
BCL2L15	0.185	9	0.062	0.525	8115	1.054	0.887	9	0.296	0.616	10288	0.981	2.859	6	1.167	0.878	12643	1.075
BCL2L2-PABPN1	-6.178	14	-1.651	0.049	1565	0.514	5.254	15	1.357	0.913	14266	1.047	1.513	10	0.478	0.684	10143	1.043
BCL3	1.891	18	0.446	0.672	10075	1.088	2.446	18	0.577	0.718	11604	1.013	-6.424	12	-1.854	0.032	1441	0.342
BCL6	6.266	17	1.52	0.936	14229	1.073	-4.537	18	-1.069	0.142	3810	0.612	-0.92	11	-0.277	0.391	6832	0.885
BCL6B	0.653	15	0.169	0.567	8671	1.066	2.661	15	0.687	0.754	12066	1.023	-2.107	12	-0.608	0.272	5362	0.783
BCL7A	-4.493	15	-1.16	0.123	2787	0.72	-4.1	13	-1.137	0.128	3539	0.591	7.67	9	2.557	0.995	14921	1.031
BCL7B	7.326	18	1.727	0.958	14722	1.061	-4.764	18	-1.123	0.131	3598	0.595	1.116	12	0.322	0.626	9472	1.023
BCL7C	-3.33	17	-0.808	0.21	4069	0.84	-0.931	18	-0.219	0.413	7684	0.88	-8.986	12	-2.594	0.005	520	0.141
BCL9	-2.473	18	-0.583	0.28	4994	0.914	2.097	18	0.494	0.689	11222	1.006	-2.399	12	-0.693	0.244	5026	0.752
BCL9L	1.878	16	0.47	0.681	10217	1.087	6.165	17	1.495	0.933	14617	1.044	1.448	11	0.436	0.669	9971	1.037
BCMO1	-4.278	18	-1.008	0.157	3303	0.774	-5.75	18	-1.355	0.088	2811	0.511	-6.391	12	-1.845	0.033	1453	0.346
BCO2	1.965	18	0.463	0.678	10169	1.088	-7.267	18	-1.713	0.043	1867	0.38	-5.157	12	-1.489	0.068	2252	0.469
BCOR	2.366	18	0.558	0.711	10637	1.091	1.593	18	0.375	0.646	10655	0.993	-5.181	12	-1.496	0.067	2228	0.468
BCORL1	-1.847	17	-0.448	0.327	5566	0.958	-3.955	18	-0.932	0.176	4313	0.666	-8.118	12	-2.343	0.01	709	0.208
BCR	-0.384	18	-0.091	0.464	7326	1.033	-2.661	18	-0.627	0.265	5663	0.767	4.287	12	1.238	0.892	12836	1.075
BCS1L	0.538	18	0.127	0.55	8444	1.063	-0.439	18	-0.103	0.459	8308	0.904	1.908	12	0.551	0.709	10415	1.053
BDH1	-1.459	18	-0.344	0.365	6103	0.977	-1.005	18	-0.237	0.406	7594	0.876	-2.203	12	-0.636	0.262	5256	0.772
BDKRB1	-0.998	12	-0.288	0.387	6374	0.989	-0.333	12	-0.096	0.462	8354	0.905	-4.718	8	-1.668	0.048	1809	0.407
BDKRB2	-1.011	15	-0.261	0.397	6515	0.994	-2.176	15	-0.562	0.287	5945	0.791	-2.627	10	-0.831	0.203	4464	0.704
BDNF	-3.519	11	-1.061	0.144	3116	0.756	-3.484	12	-1.006	0.157	4044	0.637	-4.47	8	-1.581	0.057	2011	0.438
BDP1	9.854	14	2.634	0.996	15879	1.023	2.404	17	0.583	0.72	11632	1.013	0.207	11	0.062	0.525	8309	0.977
BEAN1	-2.698	17	-0.654	0.256	4691	0.892	-5.976	17	-1.449	0.074	2513	0.479	2.666	12	0.77	0.779	11305	1.066
BECN1	1.959	15	0.506	0.693	10389	1.089	-5.482	15	-1.416	0.078	2611	0.492	-2.381	10	-0.753	0.226	4780	0.73
BEGAIN	-8.435	17	-2.046	0.02	913	0.364	1.175	18	0.277	0.609	10186	0.979	-7.509	12	-2.168	0.015	904	0.258
BEND2	0.132	18	0.031	0.512	7966	1.049	6.244	18	1.472	0.929	14559	1.045	-2.065	12	-0.596	0.276	5421	0.786
BEND3	10.684	18	2.518	0.994	15800	1.026	7.261	18	1.711	0.956	15055	1.04	3.591	12	1.037	0.85	12248	1.073
BEND4	-11.81	18	-2.784	0.003	304	0.144	1.974	18	0.465	0.679	11083	1.003	7.248	12	2.092	0.982	14442	1.051
BEND5	0.549	18	0.129	0.551	8459	1.063	-2.672	18	-0.63	0.264	5652	0.766	-0.197	12	-0.057	0.477	7783	0.949
BEND7	3.851	18	0.908	0.818	12231	1.091	-2.616	18	-0.617	0.269	5711	0.77	-0.371	12	-0.107	0.457	7546	0.937
BEST1	6.161	18	1.452	0.927	14044	1.076	1.898	18	0.447	0.673	10994	1.002	7.754	12	2.238	0.987	14612	1.045
BEST2	7.436	18	1.753	0.96	14765	1.061	3.347	18	0.789	0.785	12465	1.031	1.798	11	0.542	0.706	10390	1.051
BEST3	2.133	18	0.503	0.692	10379	1.088	-8.766	18	-2.066	0.019	1222	0.26	-0.963	12	-0.278	0.391	6828	0.885
BEST4	4.379	18	1.032	0.849	12704	1.09	5.514	18	1.3	0.903	14101	1.048	3.142	11	0.947	0.828	11952	1.072
BET1L	-3.486	18	-0.822	0.206	4003	0.838	2.684	16	0.671	0.749	12009	1.021	3.443	12	0.994	0.84	12118	1.072
BEX1	-5.097	9	-1.699	0.045	1478	0.493	-2.506	9	-0.835	0.202	4705	0.702	-5.373	6	-2.193	0.014	877	0.249
BEX4	2.906	12	0.839	0.799	11924	1.093	0.073	12	0.021	0.508	8932	0.932	-1.002	8	-0.354	0.362	6499	0.861
BEX5	-0.403	9	-0.134	0.447	7084	1.028	2.517	9	0.839	0.799	12623	1.036	-1.294	6	-0.528	0.299	5710	0.809
BFAR	-3.461	18	-0.816	0.207	4029	0.839	-4.234	18	-0.998	0.159	4075	0.639	3.124	12	0.902	0.816	11781	1.072
BFSP1	0.627	18	0.148	0.559	8556	1.065	-0.592	18	-0.139	0.445	8111	0.897	-4.41	12	-1.273	0.101	2884	0.544
BFSP2	-7.377	18	-1.739	0.041	1399	0.478	4.731	18	1.115	0.868	13586	1.045	3.799	12	1.097	0.864	12438	1.074
BGLAP	10.392	18	2.449	0.993	15736	1.029	10.647	17	2.582	0.995	16026	1.016	2.864	12	0.827	0.796	11506	1.07
BGN	-1.756	18	-0.414	0.34	5766	0.96	5.851	18	1.379	0.916	14342	1.046	-4.63	12	-1.337	0.091	2693	0.521
BHLHA15	-7.42	12	-2.142	0.016	796	0.33	6.078	12	1.754	0.96	15132	1.039	4.165	8	1.472	0.93	13387	1.074
BHLHA9	-6.246	18	-1.472	0.07	1960	0.587	-1.899	18	-0.448	0.327	6499	0.824	-1.792	12	-0.517	0.303	5757	0.813
BHLHB9	0.513	15	0.133	0.553	8479	1.063	-0.7	15	-0.181	0.428	7909	0.886	-1.281	10	-0.405	0.343	6276	0.845
BHLHE22	-1.349	12	-0.389	0.348	5871	0.968	-0.581	15	-0.15	0.44	8049	0.896	-0.082	8	-0.029	0.488	7896	0.957
BHLHE23	-4.436	15	-1.145	0.126	2840	0.724	2.015	15	0.52	0.699	11346	1.008	6.164	10	1.949	0.974	14246	1.058
BHLHE40	7.036	18	1.658	0.951	14569	1.065	-5.032	18	-1.186	0.118	3370	0.572	-7.574	12	-2.186	0.014	883	0.252
BHLHE41	-8.528	15	-2.202	0.014	734	0.307	7.463	15	1.927	0.973	15385	1.035	-2.152	10	-0.681	0.248	5085	0.755
BHMT	-0.399	18	-0.094	0.463	7298	1.034	-1.419	18	-0.335	0.369	7083	0.853	-5.515	12	-1.592	0.056	1986	0.434
BHMT2	-3.265	15	-0.843	0.2	3933	0.828	-1.656	15	-0.428	0.334	6599	0.83	5.903	10	1.867	0.969	14132	1.061
BICC1	1.524	18	0.359	0.64	9626	1.085	-0.176	18	-0.041	0.483	8628	0.917	-1.428	12	-0.412	0.34	6246	0.842
BICD1	10.906	18	2.571	0.995	15840	1.024	3.238	18	0.763	0.777	12363	1.029	0.55	12	0.159	0.563	8740	0.997
BICD2	-6.162	17	-1.494	0.068	1897	0.581	0.52	18	0.123	0.549	9441	0.951	-1.931	12	-0.557	0.289	5591	0.798
BID	-9.344	18	-2.202	0.014	732	0.308	-2.823	18	-0.665	0.253	5481	0.755	2.086	12	0.602	0.727	10610	1.059
BIK	-4.389	12	-1.267	0.103	2473	0.676	-2.581	12	-0.745	0.228	5118	0.73	-3.236	8	-1.144	0.126	3283	0.595
BIN1	6.848	18	1.614	0.947	14455	1.068	0.591	18	0.139	0.555	9520	0.955	-1.108	12	-0.32	0.375	6647	0.872
BIN3	-1.198	18	-0.282	0.389	6402	0.991	2.138	18	0.504	0.693	11270	1.006	1.372	12	0.396	0.654	9812	1.031
BIRC2	-1.439	12	-0.416	0.339	5754	0.961	-2.787	12	-0.805	0.211	4829	0.714	3.097	8	1.095	0.863	12432	1.074
BIRC5	-1.578	14	-0.422	0.337	5718	0.96	-1.777	16	-0.444	0.328	6514	0.825	1.148	10	0.363	0.642	9657	1.028
BIRC6	0.805	18	0.19	0.575	8792	1.067	-8.116	18	-1.913	0.028	1468	0.311	-1.759	12	-0.508	0.306	5797	0.816
BIRC7	-0.367	18	-0.086	0.466	7345	1.034	-2.096	18	-0.494	0.311	6262	0.812	-2.525	12	-0.729	0.233	4872	0.74
BIVM	4.247	18	1.001	0.842	12608	1.089	1.324	18	0.312	0.623	10366	0.983	3.053	12	0.881	0.811	11708	1.071
BLACE	7.478	10	2.365	0.991	15660	1.032	1.849	11	0.558	0.711	11511	1.012	-2.798	7	-1.057	0.145	3617	0.621
BLCAP	0.86	12	0.248	0.598	9090	1.073	-1.221	12	-0.353	0.362	6990	0.848	2.291	8	0.81	0.791	11446	1.069
BLID	1.116	9	0.372	0.645	9680	1.087	4.3	9	1.433	0.924	14474	1.045	-1.87	6	-0.763	0.223	4742	0.726
BLK	0.957	18	0.225	0.589	8977	1.07	-0.073	18	-0.017	0.493	8734	0.924	4.751	12	1.372	0.915	13164	1.075
BLM	-3.813	17	-0.925	0.178	3620	0.8	-10.479	18	-2.47	0.007	704	0.157	-4.502	12	-1.299	0.097	2800	0.535
BLMH	2.315	16	0.579	0.719	10742	1.091	3.055	18	0.72	0.764	12187	1.027	-5.09	11	-1.535	0.062	2110	0.458
BLNK	-3.781	16	-0.945	0.172	3539	0.794	-3.112	15	-0.804	0.211	4834	0.714	-1.753	11	-0.528	0.299	5711	0.809
BLOC1S1	7.795	18	1.837	0.967	14929	1.056	-1.949	18	-0.459	0.323	6452	0.82	10.562	12	3.049	0.999	15181	1.018
BLOC1S3	-10.33	18	-2.435	0.007	512	0.237	5.943	18	1.401	0.919	14400	1.045	-2.392	12	-0.691	0.245	5034	0.752
BLOC1S4	-1.913	12	-0.552	0.29	5120	0.925	0.395	12	0.114	0.545	9393	0.951	5.744	7	2.171	0.985	14533	1.048
BLOC1S5	-0.318	18	-0.075	0.47	7398	1.036	-11.054	18	-2.605	0.005	595	0.126	5.439	12	1.57	0.942	13601	1.071
BLOC1S6	5.688	12	1.642	0.95	14520	1.067	-1.53	10	-0.484	0.314	6317	0.814	10.657	8	3.768	1	15349	1.008
BLVRA	0.889	18	0.209	0.583	8896	1.069	-2.414	18	-0.569	0.285	5911	0.788	-6.971	12	-2.012	0.022	1141	0.299
BLVRB	-1.295	18	-0.305	0.38	6295	0.985	4.276	18	1.008	0.843	13236	1.043	2.884	12	0.832	0.797	11530	1.07
BLZF1	-1.046	15	-0.27	0.394	6468	0.992	-2.168	15	-0.56	0.288	5955	0.791	3.194	10	1.01	0.844	12174	1.072
BMF	5.957	15	1.538	0.938	14281	1.071	-5.18	15	-1.337	0.091	2856	0.519	1.796	10	0.568	0.715	10489	1.054
BMP1	-1.29	18	-0.304	0.381	6302	0.985	-1.897	18	-0.447	0.327	6501	0.824	5.407	12	1.561	0.941	13582	1.071
BMP10	1.452	18	0.342	0.634	9549	1.083	-3.902	18	-0.92	0.179	4360	0.672	-3.642	12	-1.051	0.147	3633	0.624
BMP15	2.869	18	0.676	0.751	11200	1.093	-0.437	18	-0.103	0.459	8314	0.904	4.907	12	1.417	0.922	13265	1.075
BMP2	-2.551	18	-0.601	0.274	4926	0.907	-2.181	18	-0.514	0.304	6161	0.807	-0.138	12	-0.04	0.484	7844	0.955
BMP2K	3.28	18	0.773	0.78	11618	1.095	-6.489	18	-1.53	0.063	2288	0.451	-2.423	12	-0.699	0.242	4994	0.75
BMP3	0.887	18	0.209	0.583	8893	1.069	-3.24	18	-0.764	0.223	5024	0.725	-4.143	12	-1.196	0.116	3129	0.573
BMP4	9.991	16	2.498	0.994	15783	1.027	1.915	17	0.464	0.679	11077	1.003	5.483	12	1.583	0.943	13630	1.07
BMP5	-7.324	18	-1.726	0.042	1422	0.484	-3.44	18	-0.811	0.209	4804	0.711	-3.479	12	-1.004	0.158	3831	0.636
BMP6	7.003	18	1.651	0.951	14541	1.066	-2.809	18	-0.662	0.254	5495	0.757	1.462	12	0.422	0.663	9920	1.034
BMP7	5.912	18	1.394	0.918	13888	1.078	-1.694	18	-0.399	0.345	6744	0.837	-0.189	12	-0.054	0.478	7787	0.95
BMPER	-4.142	17	-1.004	0.158	3319	0.774	0.349	18	0.082	0.533	9246	0.943	3.07	12	0.886	0.812	11721	1.072
BMPR1B	-12.286	18	-2.896	0.002	256	0.12	1.795	18	0.423	0.664	10899	0.997	-2.452	12	-0.708	0.24	4965	0.746
BMPR2	4.666	18	1.1	0.864	12962	1.088	4.189	18	0.987	0.838	13155	1.043	-2.715	12	-0.784	0.217	4639	0.722
BMS1	3.55	15	0.917	0.82	12259	1.091	-0.842	18	-0.199	0.421	7815	0.883	0.736	11	0.222	0.588	9030	1.007
BMX	6.422	17	1.558	0.94	14337	1.07	7.774	18	1.832	0.967	15254	1.037	3.523	12	1.017	0.845	12188	1.073
BNC1	3.651	18	0.861	0.805	12018	1.093	8.276	18	1.951	0.974	15414	1.035	-2.485	12	-0.717	0.237	4929	0.742
BNC2	3.086	18	0.727	0.767	11427	1.094	8.142	18	1.919	0.973	15375	1.035	7.828	12	2.26	0.988	14635	1.044
BNIP1	1.28	17	0.31	0.622	9403	1.079	1.852	18	0.437	0.669	10961	0.999	-2.181	12	-0.63	0.264	5274	0.776
BNIP2	12.297	18	2.898	0.998	16027	1.016	-2.072	18	-0.488	0.313	6299	0.812	-2.893	12	-0.835	0.202	4441	0.703
BNIP3L	-0.124	18	-0.029	0.488	7641	1.042	-6.804	18	-1.604	0.054	2103	0.423	-8.271	12	-2.388	0.008	673	0.195
BNIPL	-3.253	18	-0.767	0.222	4217	0.857	0.479	18	0.113	0.545	9389	0.95	-1.838	12	-0.531	0.298	5705	0.808
BOC	-6.642	18	-1.566	0.059	1757	0.545	1.179	18	0.278	0.609	10192	0.979	5.089	12	1.469	0.929	13378	1.074
BOD1L1	-1.293	18	-0.305	0.38	6300	0.984	-22.555	18	-5.316	0	38	0	-4.814	10	-1.522	0.064	2141	0.462
BOD1L2	1.149	9	0.383	0.649	9754	1.085	3.425	9	1.142	0.873	13669	1.046	4.287	6	1.75	0.96	13936	1.065
BOK	0.418	9	0.139	0.555	8515	1.064	-1.272	9	-0.424	0.336	6622	0.83	-5.56	6	-2.27	0.012	779	0.23
BOLA1	-1.876	15	-0.484	0.314	5419	0.945	-0.829	15	-0.214	0.415	7716	0.881	-1.618	10	-0.512	0.304	5784	0.814
BOLL	3.552	18	0.837	0.799	11914	1.094	-3.988	17	-0.967	0.167	4189	0.651	-0.403	11	-0.122	0.452	7486	0.933
BOP1	3.921	9	1.307	0.904	13624	1.083	-1.796	9	-0.599	0.275	5795	0.776	0.795	6	0.325	0.627	9484	1.023
BORA	-7.166	18	-1.689	0.046	1498	0.497	2.338	18	0.551	0.709	11481	1.011	6.288	12	1.815	0.965	14059	1.062
BPGM	-8.662	15	-2.236	0.013	705	0.293	1.319	15	0.341	0.633	10506	0.987	4.548	10	1.438	0.925	13313	1.074
BPHL	-2.308	18	-0.544	0.293	5160	0.927	-1.853	18	-0.437	0.331	6552	0.827	1.207	12	0.348	0.636	9605	1.024
BPI	7.864	17	1.907	0.972	15059	1.052	5.137	18	1.211	0.887	13867	1.047	-3.138	12	-0.906	0.183	4168	0.677
BPIFA1	5.985	18	1.411	0.921	13934	1.078	9.745	18	2.297	0.989	15807	1.024	4.608	12	1.33	0.908	13057	1.076
BPIFA2	9.671	18	2.279	0.989	15570	1.036	0.728	18	0.172	0.568	9684	0.96	-0.606	12	-0.175	0.431	7247	0.919
BPIFA3	-2.679	15	-0.692	0.245	4520	0.882	-4.367	15	-1.127	0.13	3584	0.593	-6.371	10	-2.015	0.022	1136	0.299
BPIFB1	2.725	18	0.642	0.74	11032	1.094	-0.117	18	-0.028	0.489	8683	0.922	3.732	10	1.18	0.881	12678	1.075
BPIFB2	-3.034	18	-0.715	0.237	4433	0.873	-4.712	18	-1.111	0.133	3652	0.598	-1.407	12	-0.406	0.342	6272	0.844
BPIFB3	-4.413	18	-1.04	0.149	3192	0.762	0.528	18	0.124	0.55	9453	0.952	-1.683	12	-0.486	0.314	5897	0.822
BPIFB4	4.934	18	1.163	0.878	13204	1.084	4.766	18	1.123	0.869	13609	1.046	-9.87	12	-2.849	0.002	351	0.097
BPIFB6	-1.065	18	-0.251	0.401	6569	0.995	-3.351	18	-0.79	0.215	4894	0.718	-0.238	12	-0.069	0.473	7725	0.946
BPIFC	11.352	18	2.676	0.996	15899	1.022	4.603	18	1.085	0.861	13485	1.045	-2.961	12	-0.855	0.196	4362	0.696
BPNT1	2.452	12	0.708	0.76	11340	1.094	5.773	12	1.666	0.952	14976	1.041	5.799	8	2.05	0.98	14394	1.053
BPTF	-6.883	16	-1.721	0.043	1435	0.485	6.567	17	1.593	0.944	14820	1.043	5.909	11	1.781	0.963	14003	1.063
BRAF	3.444	18	0.812	0.792	11799	1.094	-3.446	18	-0.812	0.208	4800	0.71	0.598	12	0.173	0.569	8806	0.999
BRAP	4.821	16	1.205	0.886	13350	1.082	0.321	16	0.08	0.532	9233	0.943	-0.397	8	-0.14	0.444	7401	0.928
BRAT1	-2.818	18	-0.664	0.253	4643	0.89	-0.155	15	-0.04	0.484	8633	0.918	-1.401	8	-0.495	0.31	5861	0.819
BRCA1	-36.678	18	-8.645	0	6	0	-14.636	18	-3.45	0	209	0.022	-9.291	10	-2.938	0.002	306	0.083
BRCA2	-33.825	18	-7.973	0	7	0	-21.288	18	-5.018	0	50	0	-1.646	10	-0.52	0.301	5745	0.811
BRD1	-11.57	18	-2.727	0.003	332	0.157	2.845	18	0.67	0.749	12004	1.021	-0.408	12	-0.118	0.453	7504	0.934
BRD2	-6.052	18	-1.426	0.077	2057	0.609	-0.921	18	-0.217	0.414	7698	0.881	-5.746	11	-1.732	0.042	1677	0.384
BRD3	7.778	18	1.833	0.967	14921	1.057	-5.899	18	-1.39	0.082	2695	0.499	-2.407	12	-0.695	0.244	5017	0.751
BRD4	7.597	18	1.791	0.963	14833	1.059	-5.871	18	-1.384	0.083	2716	0.502	6.009	12	1.735	0.959	13903	1.066
BRD8	-13.544	18	-3.192	0.001	169	0.068	8.113	17	1.968	0.975	15440	1.034	-11.383	10	-3.599	0	119	0.021
BRD9	2.865	16	0.716	0.763	11377	1.094	5.08	18	1.197	0.884	13824	1.047	1.974	12	0.57	0.716	10500	1.054
BRDT	-6.886	10	-2.178	0.015	751	0.32	-2.825	12	-0.816	0.207	4787	0.709	-4.056	8	-1.434	0.076	2402	0.488
BRE	-4.846	12	-1.399	0.081	2126	0.621	6.656	12	1.921	0.973	15377	1.035	-11.233	8	-3.972	0	63	0.009
BRF1	2.686	17	0.651	0.743	11081	1.093	-7.419	17	-1.799	0.036	1705	0.345	-1.334	8	-0.471	0.319	5977	0.825
BRF2	-4.733	15	-1.222	0.111	2610	0.693	-9.577	15	-2.473	0.007	701	0.157	7.482	10	2.366	0.991	14748	1.039
BRI3BP	-4.616	18	-1.088	0.138	3026	0.745	2.06	18	0.486	0.686	11186	1.004	-2.648	12	-0.764	0.222	4735	0.726
BRICD5	-3.128	18	-0.737	0.23	4346	0.865	-1.636	18	-0.386	0.35	6816	0.84	12.539	12	3.62	1	15329	1.009
BRIP1	-0.702	18	-0.166	0.434	6950	1.019	-5.414	18	-1.276	0.101	3058	0.54	-4.83	11	-1.456	0.073	2343	0.48
BRK1	-2.055	9	-0.685	0.247	4548	0.885	-3.587	9	-1.196	0.116	3329	0.57	2.134	6	0.871	0.808	11666	1.071
BRMS1	-3.17	12	-0.915	0.18	3659	0.803	-5.952	12	-1.718	0.043	1857	0.378	-2.744	8	-0.97	0.166	3946	0.651
BRMS1L	2.572	12	0.742	0.771	11489	1.095	-1.168	12	-0.337	0.368	7071	0.852	-0.054	8	-0.019	0.492	7939	0.959
BROX	-4.206	14	-1.124	0.131	2901	0.734	-7.372	15	-1.903	0.028	1481	0.315	-5.631	10	-1.781	0.037	1568	0.37
BRPF1	-0.213	18	-0.05	0.48	7529	1.04	6.978	18	1.645	0.95	14931	1.042	10.27	11	3.096	0.999	15196	1.017
BRPF3	1.077	16	0.269	0.606	9179	1.077	-4.668	18	-1.1	0.136	3692	0.601	-1.297	10	-0.41	0.341	6256	0.843
BRS3	-3.066	18	-0.723	0.235	4397	0.871	-1.902	18	-0.448	0.327	6494	0.824	-5.982	12	-1.727	0.042	1688	0.386
BRSK1	1.761	18	0.415	0.661	9926	1.086	-3.44	18	-0.811	0.209	4805	0.711	-6.556	12	-1.893	0.029	1376	0.328
BRSK2	5.645	18	1.33	0.908	13703	1.081	-3.846	18	-0.906	0.182	4423	0.675	-5.815	12	-1.679	0.047	1794	0.402
BRWD1	-7.885	18	-1.859	0.032	1178	0.437	0.255	18	0.06	0.524	9127	0.94	7.89	12	2.278	0.989	14654	1.043
BRWD3	3.916	18	0.923	0.822	12286	1.091	-13.797	18	-3.252	0.001	265	0.035	1.233	11	0.372	0.645	9699	1.029
BSCL2	3.263	18	0.769	0.779	11603	1.095	-11.434	18	-2.695	0.004	526	0.11	-2.379	12	-0.687	0.246	5054	0.753
BSDC1	-5.779	15	-1.492	0.068	1905	0.581	8.55	15	2.208	0.986	15719	1.027	8.569	9	2.856	0.998	15098	1.022
BSG	-7.378	18	-1.739	0.041	1397	0.479	-6.323	18	-1.49	0.068	2402	0.464	1.445	10	0.457	0.676	10057	1.04
BSN	10.916	18	2.573	0.995	15842	1.024	0.133	18	0.031	0.512	8987	0.933	-5.838	12	-1.685	0.046	1779	0.4
BSND	0.27	17	0.065	0.526	8131	1.055	-7.948	18	-1.873	0.031	1546	0.323	1.18	12	0.341	0.633	9561	1.024
BSPH1	-2.236	9	-0.745	0.228	4310	0.863	-4.483	9	-1.494	0.068	2387	0.463	-3.659	6	-1.494	0.068	2235	0.468
BSPRY	-0.846	15	-0.218	0.414	6707	1.006	-2.075	18	-0.489	0.312	6293	0.813	-1.984	11	-0.598	0.275	5409	0.786
BST1	-14.671	18	-3.458	0	111	0.04	-1.442	18	-0.34	0.367	7052	0.852	6.714	12	1.938	0.974	14231	1.058
BST2	-3.777	12	-1.09	0.138	3019	0.744	0.933	15	0.241	0.595	10016	0.973	0.027	10	0.008	0.503	8055	0.967
BSX	-0.059	17	-0.014	0.494	7715	1.045	-15.863	18	-3.739	0	147	0.01	5.464	12	1.577	0.943	13616	1.071
BTAF1	6.675	18	1.573	0.942	14375	1.069	-5.193	18	-1.224	0.11	3229	0.56	-3.468	11	-1.046	0.148	3657	0.626
BTBD1	11.995	18	2.827	0.998	15995	1.017	-0.889	18	-0.21	0.417	7742	0.882	-0.749	12	-0.216	0.414	7094	0.903
BTBD10	-3.792	15	-0.979	0.164	3401	0.785	-4.021	15	-1.038	0.15	3925	0.624	-3.413	9	-1.138	0.128	3308	0.597
BTBD11	4.41	16	1.102	0.865	12969	1.088	4.268	17	1.035	0.85	13324	1.044	-5.324	10	-1.684	0.046	1784	0.4
BTBD16	-3.828	17	-0.928	0.177	3604	0.799	-0.449	18	-0.106	0.458	8298	0.903	-7.497	12	-2.164	0.015	912	0.258
BTBD17	0.212	18	0.05	0.52	8051	1.053	-5.516	18	-1.3	0.097	2982	0.531	-2.858	12	-0.825	0.205	4481	0.706
BTBD18	1.582	15	0.409	0.659	9896	1.085	0.14	15	0.036	0.514	9013	0.934	-2.29	10	-0.724	0.235	4892	0.741
BTBD19	-4.377	15	-1.13	0.129	2879	0.732	5.924	18	1.396	0.919	14390	1.045	-4.463	12	-1.288	0.099	2828	0.541
BTBD2	0.313	17	0.076	0.53	8189	1.056	-2.273	18	-0.536	0.296	6071	0.798	0.37	12	0.107	0.543	8520	0.985
BTBD3	1.2	15	0.31	0.622	9401	1.079	0.615	15	0.159	0.563	9616	0.959	-3.688	10	-1.166	0.122	3208	0.587
BTBD6	7.725	9	2.575	0.995	15844	1.024	-0.192	9	-0.064	0.474	8522	0.911	3.563	6	1.455	0.927	13348	1.074
BTBD7	-4.31	18	-1.016	0.155	3276	0.771	-0.411	18	-0.097	0.461	8345	0.905	-4.99	12	-1.441	0.075	2390	0.484
BTBD8	-5.861	9	-1.954	0.025	1053	0.393	2.295	9	0.765	0.778	12370	1.029	-0.061	6	-0.025	0.49	7911	0.958
BTBD9	-2.509	18	-0.591	0.277	4968	0.91	-16.436	18	-3.874	0	122	0.007	-2.147	12	-0.62	0.268	5315	0.779
BTC	1.005	18	0.237	0.594	9041	1.071	-1.442	18	-0.34	0.367	7054	0.852	1.249	12	0.36	0.641	9648	1.027
BTD	-1.96	18	-0.462	0.322	5508	0.954	0.527	18	0.124	0.549	9451	0.952	2.239	12	0.646	0.741	10818	1.059
BTG1	5.809	18	1.369	0.915	13828	1.079	10.304	18	2.429	0.992	15923	1.02	-1.259	12	-0.363	0.358	6467	0.857
BTG2	1.168	18	0.275	0.608	9211	1.077	-2.678	18	-0.631	0.264	5646	0.765	-5.664	12	-1.635	0.051	1878	0.42
BTG3	1.372	18	0.323	0.627	9459	1.081	-3.157	18	-0.744	0.228	5125	0.73	-0.463	12	-0.134	0.447	7429	0.93
BTG4	9.537	15	2.462	0.993	15740	1.029	4.574	15	1.181	0.881	13778	1.047	7.109	10	2.248	0.988	14621	1.045
BTK	1.629	18	0.384	0.65	9764	1.085	-2.29	18	-0.54	0.295	6046	0.798	-1.519	12	-0.439	0.331	6120	0.835
BTLA	4.104	10	1.298	0.903	13603	1.082	-4.487	12	-1.295	0.098	3000	0.533	-10.325	8	-3.651	0	111	0.018
BTN1A1	-10.243	18	-2.414	0.008	532	0.242	-0.5	18	-0.118	0.453	8234	0.901	2.608	10	0.825	0.795	11501	1.07
BTN2A1	1.405	9	0.468	0.68	10207	1.087	-3.849	9	-1.283	0.1	3037	0.538	-0.34	6	-0.139	0.445	7409	0.929
BTN3A1	-2.363	9	-0.788	0.215	4142	0.848	1.639	9	0.546	0.708	11464	1.01	-1.676	6	-0.684	0.247	5068	0.754
BTN3A3	-0.494	9	-0.165	0.435	6953	1.02	1.321	9	0.44	0.67	10971	1	8.911	6	3.638	1	15335	1.008
BTNL2	-0.999	12	-0.288	0.387	6373	0.989	-1.296	12	-0.374	0.354	6878	0.843	-1.05	8	-0.371	0.355	6429	0.855
BTNL3	-1.333	15	-0.344	0.365	6102	0.976	-3.581	15	-0.924	0.178	4343	0.669	-4.503	10	-1.424	0.077	2429	0.492
BTNL8	2.934	17	0.712	0.762	11356	1.094	3.647	18	0.86	0.805	12707	1.037	-6.647	12	-1.919	0.027	1318	0.323
BTNL9	0.758	18	0.179	0.571	8730	1.067	2.355	18	0.555	0.711	11500	1.011	-5.313	12	-1.534	0.063	2112	0.458
BTRC	6.367	18	1.501	0.933	14177	1.074	-0.656	18	-0.155	0.439	8031	0.894	-0.022	12	-0.006	0.497	7991	0.963
BUB1	8.284	17	2.009	0.978	15212	1.048	3.636	18	0.857	0.804	12694	1.037	-2.811	11	-0.848	0.198	4392	0.699
BUB1B	5.781	12	1.669	0.952	14593	1.065	-7.527	8	-2.661	0.004	553	0.115	1.236	9	0.412	0.66	9882	1.033
BUB3	-2.013	11	-0.607	0.272	4895	0.906	-3.958	11	-1.193	0.116	3340	0.57	-4.568	7	-1.727	0.042	1689	0.386
BUD13	4.213	18	0.993	0.84	12581	1.088	-3.993	18	-0.941	0.173	4274	0.664	-6.186	12	-1.786	0.037	1554	0.369
BUD31	-5.015	11	-1.512	0.065	1852	0.575	11.889	10	3.76	1	16332	1.002	-5.246	8	-1.855	0.032	1439	0.342
BYSL	0.895	10	0.283	0.611	9252	1.078	0.044	14	0.012	0.505	8880	0.93	6.234	8	2.204	0.986	14567	1.047
BZRAP1	5.222	18	1.231	0.891	13417	1.083	9.218	18	2.173	0.985	15675	1.029	2.906	12	0.839	0.799	11554	1.07
BZW1	-7.97	12	-2.301	0.011	652	0.268	-0.472	12	-0.136	0.446	8122	0.899	-2.008	7	-0.759	0.224	4755	0.728
BZW2	1.309	18	0.308	0.621	9396	1.078	12.305	18	2.9	0.998	16175	1.01	-3.965	12	-1.145	0.126	3280	0.595
C10orf10	2.16	15	0.558	0.711	10636	1.091	-8.19	15	-2.115	0.017	1152	0.245	7.022	10	2.221	0.987	14583	1.047
C10orf11	1.201	17	0.291	0.615	9293	1.079	-1.911	18	-0.45	0.326	6486	0.823	1.539	11	0.464	0.679	10095	1.04
C10orf112	-5.431	18	-1.28	0.1	2441	0.67	5.789	18	1.364	0.914	14297	1.046	1.479	12	0.427	0.665	9934	1.036
C10orf113	2.912	8	1.03	0.848	12694	1.09	-2.526	8	-0.893	0.186	4470	0.681	6.341	6	2.589	0.995	14940	1.03
C10orf114	-9.341	15	-2.412	0.008	534	0.242	1.713	14	0.458	0.676	11042	1.003	-0.198	10	-0.063	0.475	7750	0.948
C10orf118	3.891	18	0.917	0.82	12263	1.091	-4.593	18	-1.083	0.139	3764	0.607	-8.06	12	-2.327	0.01	723	0.214
C10orf12	-2.439	12	-0.704	0.241	4473	0.878	-3.259	12	-0.941	0.173	4276	0.664	-4.214	8	-1.49	0.068	2250	0.468
C10orf120	-1.392	9	-0.464	0.321	5499	0.953	-2.021	9	-0.674	0.25	5422	0.755	-2.109	6	-0.861	0.195	4335	0.695
C10orf128	8.914	12	2.573	0.995	15843	1.024	-6.21	12	-1.793	0.037	1717	0.348	-2.566	8	-0.907	0.182	4164	0.677
C10orf129	0.049	18	0.012	0.505	7864	1.047	-0.053	18	-0.012	0.495	8758	0.925	0.785	12	0.226	0.59	9054	1.007
C10orf137	2.559	18	0.603	0.727	10848	1.093	2.409	18	0.568	0.715	11558	1.013	9.584	12	2.767	0.997	15048	1.025
C10orf2	2.042	13	0.566	0.714	10683	1.091	12.346	18	2.91	0.998	16185	1.01	-1.064	9	-0.355	0.361	6498	0.86
C10orf25	-4.212	15	-1.087	0.138	3027	0.746	9.54	15	2.463	0.993	15944	1.02	-2.562	10	-0.81	0.209	4538	0.712
C10orf32	-4.153	9	-1.384	0.083	2159	0.628	-4.607	9	-1.536	0.062	2276	0.448	-4.737	6	-1.934	0.027	1280	0.321
C10orf35	1.557	14	0.416	0.661	9934	1.086	-8.955	15	-2.312	0.01	874	0.195	4.005	10	1.267	0.897	12901	1.076
C10orf54	0.551	18	0.13	0.552	8466	1.063	-8.07	18	-1.902	0.029	1490	0.314	5.018	12	1.449	0.926	13336	1.074
C10orf55	2.245	15	0.58	0.719	10748	1.091	-8.181	17	-1.984	0.024	1345	0.287	5.572	9	1.857	0.968	14118	1.061
C10orf62	2.429	18	0.573	0.717	10709	1.091	-0.249	18	-0.059	0.477	8554	0.912	1.546	12	0.446	0.672	10013	1.039
C10orf67	0.614	10	0.194	0.577	8813	1.068	1.564	11	0.472	0.681	11112	1.004	-0.777	8	-0.275	0.392	6840	0.886
C10orf71	11.75	18	2.77	0.997	15959	1.019	0.17	18	0.04	0.516	9030	0.935	-1.434	12	-0.414	0.339	6234	0.842
C10orf76	5.19	18	1.223	0.889	13396	1.083	-3.446	18	-0.812	0.208	4799	0.711	-2.373	11	-0.715	0.237	4938	0.743
C10orf82	1.095	9	0.365	0.642	9650	1.086	0.369	9	0.123	0.549	9444	0.951	-0.588	6	-0.24	0.405	6990	0.897
C10orf85	-1.652	8	-0.584	0.28	4985	0.915	2.937	9	0.979	0.836	13131	1.042	-1.454	6	-0.593	0.276	5430	0.787
C10orf88	3.226	12	0.931	0.824	12322	1.091	-2.556	12	-0.738	0.23	5150	0.732	-4.25	8	-1.503	0.066	2203	0.467
C10orf90	4.396	17	1.066	0.857	12833	1.089	6.578	15	1.699	0.955	15037	1.04	0.448	10	0.142	0.556	8667	0.993
C10orf91	-6.807	15	-1.758	0.039	1366	0.47	-1.076	15	-0.278	0.391	7393	0.865	1.414	10	0.447	0.673	10017	1.039
C10orf95	-6.929	15	-1.789	0.037	1299	0.462	-3.077	15	-0.795	0.213	4868	0.718	-1.296	10	-0.41	0.341	6257	0.843
C10orf99	3.617	9	1.206	0.886	13353	1.082	-6.879	9	-2.293	0.011	905	0.198	-2.014	6	-0.822	0.205	4492	0.707
C11orf1	2.137	9	0.712	0.762	11359	1.094	-1.153	9	-0.384	0.35	6828	0.84	-4.956	6	-2.023	0.022	1120	0.297
C11orf16	7.06	16	1.765	0.961	14784	1.06	-2.241	16	-0.56	0.288	5950	0.791	0.876	11	0.264	0.604	9229	1.012
C11orf21	1.9	18	0.448	0.673	10088	1.088	5.147	18	1.213	0.887	13880	1.047	-5.415	12	-1.563	0.059	2039	0.448
C11orf24	5.788	15	1.494	0.932	14160	1.074	-10.366	15	-2.676	0.004	541	0.113	-0.961	10	-0.304	0.381	6714	0.877
C11orf30	-1.94	18	-0.457	0.324	5528	0.955	-18.35	18	-4.325	0	79	0.002	-12.422	11	-3.745	0	95	0.015
C11orf31	-9.948	15	-2.568	0.005	421	0.198	-8.065	15	-2.082	0.019	1190	0.257	2.27	10	0.718	0.764	11098	1.064
C11orf34	1.393	11	0.42	0.663	9956	1.086	-4.01	12	-1.157	0.124	3472	0.582	3.101	8	1.096	0.864	12434	1.074
C11orf35	0.211	18	0.05	0.52	8049	1.053	-3.044	18	-0.717	0.237	5233	0.74	12.771	11	3.85	1	15364	1.007
C11orf40	-4.315	9	-1.438	0.075	2033	0.603	7.424	9	2.475	0.993	15951	1.019	-0.926	6	-0.378	0.353	6391	0.853
C11orf42	0.487	18	0.115	0.546	8389	1.061	-12.001	18	-2.829	0.002	446	0.086	-4.777	12	-1.379	0.084	2569	0.506
C11orf45	-2.803	18	-0.661	0.254	4661	0.89	-7.263	18	-1.712	0.043	1871	0.38	4.65	12	1.342	0.91	13089	1.076
C11orf48	-8.602	16	-2.15	0.016	783	0.328	-5.36	17	-1.3	0.097	2983	0.531	-6.767	11	-2.04	0.021	1087	0.294
C11orf49	-1.917	18	-0.452	0.326	5546	0.958	-6.475	18	-1.526	0.063	2301	0.452	2.932	12	0.846	0.801	11580	1.07
C11orf52	-7.709	18	-1.817	0.035	1240	0.455	11.038	18	2.602	0.995	16037	1.016	2.437	12	0.704	0.759	11047	1.063
C11orf53	-0.324	12	-0.093	0.463	7303	1.034	-7.117	12	-2.054	0.02	1239	0.264	5.466	8	1.932	0.973	14224	1.058
C11orf54	1.381	7	0.522	0.699	10454	1.091	-0.659	9	-0.22	0.413	7682	0.88	2.77	6	1.131	0.871	12534	1.075
C11orf57	5.76	12	1.663	0.952	14578	1.065	-11.135	12	-3.215	0.001	280	0.038	-3.927	7	-1.484	0.069	2265	0.47
C11orf63	3.65	18	0.86	0.805	12016	1.093	-5.154	18	-1.215	0.112	3258	0.564	-3.483	12	-1.006	0.157	3825	0.636
C11orf68	2.897	12	0.836	0.799	11911	1.093	-1.785	12	-0.515	0.303	6156	0.806	-0.89	8	-0.315	0.377	6672	0.873
C11orf70	-1.517	9	-0.506	0.307	5326	0.939	-0.801	9	-0.267	0.395	7447	0.868	-2.627	6	-1.073	0.142	3557	0.616
C11orf71	-3.575	15	-0.923	0.178	3630	0.8	-5.489	15	-1.417	0.078	2605	0.491	2.073	10	0.656	0.744	10855	1.06
C11orf80	-7.376	18	-1.738	0.041	1400	0.478	-12.493	18	-2.945	0.002	382	0.069	-3.039	12	-0.877	0.19	4269	0.689
C11orf82	4.445	12	1.283	0.9	13556	1.083	-5.339	12	-1.541	0.062	2265	0.445	-2.272	8	-0.803	0.211	4567	0.714
C11orf83	8.002	15	2.066	0.981	15287	1.046	-1.169	17	-0.283	0.388	7367	0.863	5.285	10	1.671	0.953	13794	1.068
C11orf84	-5.547	18	-1.307	0.096	2360	0.66	0.635	18	0.15	0.559	9573	0.957	-0.712	12	-0.206	0.419	7132	0.908
C11orf85	8.47	18	1.996	0.977	15187	1.049	-8.337	18	-1.965	0.025	1380	0.293	-2.688	11	-0.811	0.209	4535	0.712
C11orf86	6.657	13	1.846	0.968	14954	1.055	-9.947	15	-2.568	0.005	630	0.133	2.255	10	0.713	0.762	11088	1.063
C11orf87	0.373	15	0.096	0.538	8284	1.06	-4.981	15	-1.286	0.099	3031	0.536	-1.325	10	-0.419	0.338	6212	0.841
C11orf88	-4.685	12	-1.352	0.088	2238	0.642	-5.095	12	-1.471	0.071	2460	0.47	-3.607	8	-1.275	0.101	2875	0.544
C11orf89	-4.807	18	-1.133	0.129	2873	0.73	-3.508	18	-0.827	0.204	4742	0.705	13.333	12	3.849	1	15363	1.007
C11orf91	0.369	12	0.107	0.542	8338	1.061	1.587	12	0.458	0.677	11047	1.003	3.36	8	1.188	0.883	12695	1.075
C11orf92	-2.151	8	-0.761	0.223	4240	0.86	-5.448	9	-1.816	0.035	1669	0.34	-1.311	6	-0.535	0.296	5689	0.806
C11orf94	-8.135	14	-2.174	0.015	757	0.32	2.365	15	0.611	0.729	11745	1.016	-5.058	10	-1.6	0.055	1960	0.433
C11orf96	-2.624	18	-0.618	0.268	4850	0.902	0.39	18	0.092	0.537	9300	0.945	-2.976	12	-0.859	0.195	4342	0.695
C12orf10	-4.503	17	-1.092	0.137	3007	0.745	2.511	17	0.609	0.729	11734	1.017	-5.253	10	-1.661	0.048	1821	0.411
C12orf36	-5.607	9	-1.869	0.031	1164	0.432	2.064	9	0.688	0.754	12069	1.023	-0.611	6	-0.25	0.401	6951	0.893
C12orf39	2.041	18	0.481	0.685	10269	1.088	-7.209	18	-1.699	0.045	1897	0.385	-2.781	12	-0.803	0.211	4569	0.714
C12orf4	-0.437	15	-0.113	0.455	7203	1.03	1.657	15	0.428	0.666	10919	0.998	3.496	10	1.105	0.866	12459	1.074
C12orf42	-4.933	18	-1.163	0.122	2781	0.718	2.162	18	0.51	0.695	11299	1.007	8.83	12	2.549	0.995	14914	1.031
C12orf43	14.108	17	3.422	1	16195	1.007	-0.283	16	-0.071	0.472	8495	0.909	4.434	9	1.478	0.93	13408	1.073
C12orf44	-1.727	16	-0.432	0.333	5665	0.959	-4.312	18	-1.016	0.155	4000	0.633	1.381	12	0.399	0.655	9829	1.031
C12orf49	-6.697	15	-1.729	0.042	1413	0.483	0.694	15	0.179	0.571	9723	0.962	6.306	10	1.994	0.977	14311	1.056
C12orf5	3.628	18	0.855	0.804	11994	1.093	-2.06	18	-0.486	0.314	6311	0.814	-6.081	12	-1.755	0.04	1627	0.376
C12orf50	-1.662	9	-0.554	0.29	5111	0.925	0.752	9	0.251	0.599	10061	0.975	-2.101	6	-0.858	0.195	4345	0.696
C12orf52	3.851	18	0.908	0.818	12233	1.091	-1.834	18	-0.432	0.333	6573	0.829	2.87	12	0.828	0.796	11516	1.07
C12orf54	4.544	9	1.515	0.935	14215	1.073	4.634	9	1.545	0.939	14722	1.044	-0.371	6	-0.152	0.44	7347	0.926
C12orf55	-2.144	18	-0.505	0.307	5329	0.939	6.475	18	1.526	0.937	14682	1.044	5.835	12	1.685	0.954	13823	1.067
C12orf56	-6.707	15	-1.732	0.042	1408	0.483	-2.863	15	-0.739	0.23	5142	0.732	-6.219	10	-1.967	0.025	1230	0.31
C12orf57	-5.837	18	-1.376	0.084	2182	0.631	4.37	18	1.03	0.848	13298	1.044	-9.141	11	-2.756	0.003	403	0.112
C12orf61	1.608	12	0.464	0.679	10175	1.088	6.89	12	1.989	0.977	15471	1.033	-0.911	8	-0.322	0.374	6641	0.87
C12orf65	-2.205	8	-0.78	0.218	4162	0.853	10.244	9	3.415	1	16302	1.004	4.581	6	1.87	0.969	14141	1.06
C12orf66	-10.887	18	-2.566	0.005	423	0.198	-12.146	18	-2.863	0.002	426	0.081	-1.761	12	-0.508	0.306	5792	0.816
C12orf68	3.387	15	0.875	0.809	12075	1.093	3.394	15	0.876	0.81	12758	1.039	-1.214	10	-0.384	0.351	6375	0.851
C12orf73	-2.342	11	-0.706	0.24	4465	0.877	8.105	12	2.34	0.99	15847	1.023	-3.008	8	-1.064	0.144	3590	0.619
C12orf74	6.015	18	1.418	0.922	13952	1.078	-2.271	18	-0.535	0.296	6074	0.798	-3.576	12	-1.032	0.151	3701	0.631
C12orf75	2.681	9	0.894	0.814	12168	1.091	-1.421	9	-0.474	0.318	6375	0.816	-4.067	6	-1.66	0.048	1824	0.411
C12orf76	1.531	15	0.395	0.654	9829	1.085	0.999	15	0.258	0.602	10088	0.976	6.55	10	2.071	0.981	14418	1.052
C12orf77	0.61	18	0.144	0.557	8536	1.065	10.291	18	2.426	0.992	15920	1.02	-8.769	12	-2.531	0.006	562	0.156
C13orf35	0.494	12	0.143	0.557	8528	1.065	3.649	12	1.053	0.854	13390	1.044	0.943	8	0.333	0.631	9528	1.024
C13orf45	-2.802	14	-0.749	0.227	4291	0.863	7.179	15	1.854	0.968	15287	1.037	-2.066	10	-0.653	0.257	5195	0.765
C14orf1	1.453	15	0.375	0.646	9705	1.086	0.846	15	0.218	0.586	9904	0.969	-1.947	10	-0.616	0.269	5328	0.781
C14orf105	-3.929	8	-1.389	0.082	2150	0.625	3.593	9	1.198	0.884	13828	1.047	-0.304	6	-0.124	0.451	7475	0.933
C14orf119	-2.376	8	-0.84	0.2	3943	0.829	-1.207	9	-0.402	0.344	6732	0.836	1.767	6	0.721	0.765	11119	1.064
C14orf132	1.376	12	0.397	0.654	9840	1.085	-7.096	12	-2.048	0.02	1254	0.264	-0.246	8	-0.087	0.465	7637	0.942
C14orf142	-2.366	12	-0.683	0.247	4563	0.884	0.519	12	0.15	0.56	9574	0.957	1.693	7	0.64	0.739	10787	1.059
C14orf159	0.042	18	0.01	0.504	7856	1.046	10.84	18	2.555	0.995	16006	1.017	0.438	12	0.126	0.55	8605	0.989
C14orf164	2.546	15	0.657	0.745	11116	1.092	-2.704	15	-0.698	0.243	5326	0.745	-11.832	10	-3.741	0	96	0.015
C14orf166B	-1.972	18	-0.465	0.321	5496	0.953	8.238	15	2.127	0.983	15634	1.03	5.369	10	1.698	0.955	13846	1.067
C14orf180	-3.073	18	-0.724	0.234	4392	0.871	-11.546	18	-2.721	0.003	507	0.105	-5.405	12	-1.56	0.059	2044	0.449
C14orf183	3.1	18	0.731	0.768	11443	1.094	5.539	18	1.306	0.904	14121	1.048	0.649	12	0.187	0.574	8868	1.002
C14orf37	-4.741	18	-1.117	0.132	2929	0.735	-3.494	18	-0.823	0.205	4755	0.706	-2.976	12	-0.859	0.195	4340	0.695
C14orf79	-9.212	18	-2.171	0.015	758	0.322	-4.959	18	-1.169	0.121	3432	0.578	-9.197	12	-2.655	0.004	482	0.127
C14orf80	6.894	18	1.625	0.948	14472	1.068	-3.99	18	-0.941	0.173	4279	0.664	-5.176	10	-1.637	0.051	1876	0.419
C14orf93	0.714	18	0.168	0.567	8667	1.067	-2.623	18	-0.618	0.268	5701	0.77	0.196	12	0.057	0.523	8275	0.977
C15orf26	-1.434	18	-0.338	0.368	6136	0.977	-2.146	18	-0.506	0.307	6208	0.808	-1.861	12	-0.537	0.296	5678	0.805
C15orf27	4.105	18	0.968	0.833	12481	1.089	6.158	18	1.451	0.927	14518	1.045	-10.475	12	-3.024	0.001	274	0.07
C15orf32	9.116	18	2.149	0.984	15402	1.042	-1.759	18	-0.415	0.339	6668	0.833	-2.368	12	-0.684	0.247	5071	0.754
C15orf37	5.057	12	1.46	0.928	14066	1.076	1.5	12	0.433	0.668	10946	0.998	-5.389	8	-1.905	0.028	1355	0.324
C15orf38	-3.007	18	-0.709	0.239	4453	0.876	-3.75	18	-0.884	0.188	4509	0.684	4.148	12	1.197	0.884	12723	1.075
C15orf39	6.499	18	1.532	0.937	14266	1.072	1.489	18	0.351	0.637	10550	0.989	4.769	12	1.377	0.916	13182	1.074
C15orf41	-1.578	15	-0.407	0.342	5788	0.963	-13.108	14	-3.503	0	197	0.019	-8.556	12	-2.47	0.007	614	0.17
C15orf43	1.62	11	0.488	0.687	10310	1.087	-1.961	11	-0.591	0.277	5821	0.78	-3.882	6	-1.585	0.056	1999	0.437
C15orf48	-0.576	9	-0.192	0.424	6817	1.014	1.495	9	0.498	0.691	11243	1.006	0.536	6	0.219	0.587	9015	1.007
C15orf52	-8.741	15	-2.257	0.012	689	0.284	-11.209	17	-2.719	0.003	508	0.106	2.435	12	0.703	0.759	11044	1.063
C15orf53	3.296	11	0.994	0.84	12584	1.089	2.041	12	0.589	0.722	11659	1.014	0.356	8	0.126	0.55	8603	0.989
C15orf56	2.186	15	0.564	0.714	10674	1.091	-5.382	15	-1.39	0.082	2696	0.5	-1.389	10	-0.439	0.33	6118	0.835
C15orf57	0.456	18	0.108	0.543	8345	1.061	3.528	18	0.832	0.797	12597	1.036	-3.965	12	-1.145	0.126	3281	0.595
C15orf59	3.348	17	0.812	0.792	11803	1.094	-4.675	18	-1.102	0.135	3685	0.601	2.954	11	0.891	0.813	11738	1.072
C15orf60	4.76	18	1.122	0.869	13055	1.086	2.674	18	0.63	0.736	11845	1.017	-1.917	12	-0.553	0.29	5613	0.799
C15orf61	-5.748	15	-1.484	0.069	1930	0.582	1.942	15	0.501	0.692	11260	1.006	-2.406	10	-0.761	0.223	4752	0.727
C15orf62	-2.46	15	-0.635	0.263	4768	0.899	-5.365	15	-1.385	0.083	2709	0.501	0.965	9	0.322	0.626	9470	1.023
C16orf11	-0.143	18	-0.034	0.487	7609	1.043	-0.639	18	-0.151	0.44	8046	0.896	-4.737	12	-1.367	0.086	2609	0.508
C16orf13	3.239	18	0.763	0.777	11582	1.095	2.239	18	0.528	0.701	11379	1.009	10.709	12	3.091	0.999	15194	1.017
C16orf45	-11.691	18	-2.756	0.003	318	0.15	-4.152	18	-0.979	0.164	4145	0.647	1.202	12	0.347	0.636	9598	1.024
C16orf46	-5.876	14	-1.571	0.058	1746	0.543	-1.754	15	-0.453	0.325	6476	0.822	2.82	10	0.892	0.814	11743	1.072
C16orf47	5.445	12	1.572	0.942	14368	1.069	-5.238	12	-1.512	0.065	2338	0.457	-0.336	8	-0.119	0.453	7496	0.934
C16orf52	6.457	11	1.947	0.974	15117	1.051	-2.003	12	-0.578	0.282	5877	0.784	-2.21	8	-0.781	0.217	4653	0.722
C16orf54	-1.785	12	-0.515	0.303	5273	0.938	-2.249	12	-0.649	0.258	5549	0.762	4.457	8	1.576	0.942	13614	1.071
C16orf55	3.51	14	0.938	0.826	12347	1.091	-3.108	13	-0.862	0.194	4583	0.694	-2.516	9	-0.839	0.201	4428	0.701
C16orf58	8.803	18	2.075	0.981	15298	1.046	7.023	18	1.655	0.951	14952	1.041	0.182	12	0.053	0.521	8259	0.976
C16orf59	8.464	18	1.995	0.977	15185	1.049	14.921	18	3.517	1	16315	1.003	-2.479	9	-0.826	0.204	4477	0.706
C16orf62	-5.37	18	-1.266	0.103	2481	0.676	-7.255	18	-1.71	0.044	1874	0.381	-7.833	12	-2.261	0.012	787	0.233
C16orf70	-1.5	18	-0.354	0.362	6055	0.975	1.955	17	0.474	0.682	11128	1.004	8.777	12	2.534	0.994	14901	1.032
C16orf71	-4.571	18	-1.077	0.141	3064	0.749	-5.867	18	-1.383	0.083	2720	0.502	1.242	12	0.359	0.64	9635	1.028
C16orf72	3.53	18	0.832	0.797	11887	1.094	2.839	18	0.669	0.748	11997	1.021	-10.644	10	-3.366	0	171	0.035
C16orf74	1.345	18	0.317	0.624	9424	1.081	7.048	18	1.661	0.952	14967	1.041	-6.176	12	-1.783	0.037	1563	0.369
C16orf78	-0.32	18	-0.075	0.47	7394	1.037	-3.568	18	-0.841	0.2	4682	0.7	2.185	11	0.659	0.745	10869	1.06
C16orf80	-6.895	17	-1.672	0.047	1528	0.504	-2.928	14	-0.783	0.217	4931	0.72	1.455	9	0.485	0.686	10175	1.043
C16orf86	0.8	18	0.189	0.575	8787	1.067	-18.408	17	-4.465	0	72	0.001	-4.3	11	-1.297	0.097	2808	0.537
C16orf89	0.341	18	0.08	0.532	8211	1.057	-1.438	18	-0.339	0.367	7063	0.851	6.715	11	2.025	0.979	14349	1.055
C16orf90	7.789	18	1.836	0.967	14923	1.057	-7.623	18	-1.797	0.036	1711	0.346	3.509	12	1.013	0.844	12177	1.073
C16orf91	-1.202	17	-0.291	0.385	6357	0.989	1.318	18	0.311	0.622	10350	0.984	-3.396	12	-0.98	0.163	3905	0.647
C16orf92	1.244	18	0.293	0.615	9306	1.078	3.165	18	0.746	0.772	12295	1.028	0.171	12	0.049	0.52	8249	0.974
C16orf93	-5.206	18	-1.227	0.11	2591	0.692	-1.234	18	-0.291	0.386	7325	0.862	5.671	12	1.637	0.949	13725	1.07
C16orf95	-8.493	18	-2.002	0.023	974	0.379	-6.032	18	-1.422	0.078	2597	0.489	1.587	12	0.458	0.677	10061	1.04
C16orf96	-1.709	18	-0.403	0.344	5815	0.964	10.304	18	2.429	0.992	15924	1.02	3.956	12	1.142	0.873	12574	1.074
C16orf97	-1.116	12	-0.322	0.374	6208	0.982	4.692	12	1.354	0.912	14263	1.047	-6.153	8	-2.175	0.015	894	0.256
C17orf100	-10.417	18	-2.455	0.007	496	0.231	-5.116	18	-1.206	0.114	3300	0.565	5.793	12	1.672	0.953	13796	1.068
C17orf102	-2.114	15	-0.546	0.293	5145	0.928	12.796	15	3.304	1	16283	1.005	3.447	10	1.09	0.862	12418	1.074
C17orf103	-10.33	18	-2.435	0.007	511	0.238	1.022	18	0.241	0.595	10015	0.973	6.165	12	1.78	0.962	13999	1.063
C17orf104	0.957	12	0.276	0.609	9222	1.077	2.122	12	0.612	0.73	11756	1.016	-4.615	8	-1.632	0.051	1884	0.422
C17orf105	-3.082	12	-0.89	0.187	3758	0.811	-1.198	12	-0.346	0.365	7030	0.849	2.966	8	1.049	0.853	12288	1.073
C17orf107	-7.102	18	-1.674	0.047	1523	0.504	7.08	16	1.77	0.962	15154	1.039	-6.51	12	-1.879	0.03	1397	0.333
C17orf47	-4.283	14	-1.145	0.126	2845	0.723	-2.201	15	-0.568	0.285	5917	0.788	-5.123	10	-1.62	0.053	1913	0.425
C17orf49	3.153	16	0.788	0.785	11688	1.095	-7.728	18	-1.822	0.034	1655	0.339	5.551	12	1.602	0.945	13666	1.07
C17orf50	-6.553	12	-1.892	0.029	1133	0.421	0.202	12	0.058	0.523	9115	0.94	0.573	7	0.216	0.586	9002	1.006
C17orf51	0.26	9	0.087	0.535	8246	1.057	-1.522	9	-0.507	0.306	6199	0.808	-2.54	6	-1.037	0.15	3687	0.629
C17orf53	1.253	18	0.295	0.616	9321	1.078	-24.821	18	-5.85	0	28	0	-5.455	12	-1.575	0.058	2018	0.442
C17orf59	-16.202	14	-4.33	0	47	0.003	7.199	15	1.859	0.968	15295	1.037	0.018	9	0.006	0.502	8042	0.966
C17orf62	3.432	18	0.809	0.791	11788	1.094	1.529	18	0.36	0.641	10587	0.991	-5.771	12	-1.666	0.048	1812	0.408
C17orf64	-3.114	15	-0.804	0.211	4081	0.842	0.73	15	0.189	0.575	9774	0.963	-1.669	10	-0.528	0.299	5715	0.809
C17orf66	8.878	18	2.092	0.982	15332	1.044	-1.006	18	-0.237	0.406	7590	0.876	-2.167	12	-0.626	0.266	5288	0.777
C17orf70	-12.427	18	-2.929	0.002	246	0.113	-14.145	18	-3.334	0	239	0.029	-8.432	12	-2.434	0.007	635	0.182
C17orf72	0.301	18	0.071	0.528	8157	1.056	3.703	18	0.873	0.809	12746	1.039	2.883	12	0.832	0.797	11529	1.07
C17orf74	-4.044	18	-0.953	0.17	3501	0.793	3.029	18	0.714	0.762	12163	1.026	4.014	12	1.159	0.877	12615	1.075
C17orf75	-4.989	18	-1.176	0.12	2736	0.714	-3.874	18	-0.913	0.181	4391	0.673	-3.016	12	-0.871	0.192	4302	0.69
C17orf77	5.505	12	1.589	0.944	14411	1.068	-6.501	12	-1.877	0.03	1538	0.322	1.331	8	0.471	0.681	10118	1.041
C17orf78	-7.045	15	-1.819	0.034	1234	0.455	2.263	15	0.584	0.72	11637	1.013	-2.544	10	-0.804	0.211	4560	0.714
C17orf80	-2.425	12	-0.7	0.242	4492	0.879	9.668	12	2.791	0.997	16134	1.012	3.225	8	1.14	0.873	12568	1.074
C17orf82	-3.82	15	-0.986	0.162	3372	0.784	5.643	15	1.457	0.927	14522	1.045	-0.69	10	-0.218	0.414	7085	0.903
C17orf85	-15.274	18	-3.6	0	100	0.026	-5.266	18	-1.241	0.107	3173	0.553	-6.711	12	-1.937	0.026	1276	0.32
C17orf96	2.37	18	0.559	0.712	10640	1.091	8.67	17	2.103	0.982	15604	1.03	7.83	11	2.361	0.991	14741	1.04
C17orf97	-8.103	18	-1.91	0.028	1111	0.412	-5.098	16	-1.275	0.101	3064	0.541	0.216	11	0.065	0.526	8331	0.977
C17orf98	3.947	18	0.93	0.824	12316	1.091	-1.949	18	-0.459	0.323	6451	0.82	1.178	12	0.34	0.633	9555	1.025
C17orf99	11.524	18	2.716	0.997	15918	1.021	1.604	18	0.378	0.647	10672	0.993	-2.586	12	-0.747	0.228	4803	0.733
C18orf21	4.975	15	1.284	0.901	13559	1.083	-1.736	17	-0.421	0.337	6636	0.831	-3.549	10	-1.122	0.131	3362	0.602
C18orf32	1.208	9	0.403	0.656	9867	1.085	-5.931	9	-1.977	0.024	1357	0.29	2.139	6	0.873	0.809	11678	1.071
C18orf54	-5.315	18	-1.253	0.105	2529	0.678	3.053	18	0.72	0.764	12185	1.027	-2.006	12	-0.579	0.281	5491	0.792
C18orf63	-0.965	15	-0.249	0.402	6580	0.996	1.741	15	0.45	0.673	11008	1.002	5.668	10	1.792	0.963	14024	1.063
C18orf8	3.719	18	0.877	0.81	12085	1.093	6.524	18	1.538	0.938	14705	1.044	-4.571	12	-1.319	0.094	2742	0.527
C19orf10	-5.547	18	-1.307	0.096	2361	0.66	1.019	18	0.24	0.595	10008	0.973	7.919	12	2.286	0.989	14661	1.043
C19orf12	1.007	12	0.291	0.614	9290	1.079	1.669	12	0.482	0.685	11168	1.004	0.842	8	0.298	0.617	9379	1.018
C19orf18	-6.175	12	-1.783	0.037	1316	0.463	5.198	12	1.501	0.933	14634	1.044	3.706	8	1.31	0.905	13021	1.075
C19orf24	-3.879	15	-1.002	0.158	3334	0.774	-4.51	15	-1.165	0.122	3448	0.58	3.828	7	1.447	0.926	13328	1.075
C19orf25	5.722	15	1.477	0.93	14116	1.075	0.584	15	0.151	0.56	9577	0.957	-1.566	10	-0.495	0.31	5860	0.819
C19orf26	6.101	18	1.438	0.925	14006	1.077	1.115	18	0.263	0.604	10117	0.977	-3.809	12	-1.099	0.136	3451	0.609
C19orf33	3.386	15	0.874	0.809	12073	1.093	3.562	15	0.92	0.821	12917	1.041	-3.174	10	-1.004	0.158	3832	0.637
C19orf35	-1.887	18	-0.445	0.328	5589	0.958	-1.336	18	-0.315	0.376	7180	0.858	5.017	12	1.448	0.926	13334	1.074
C19orf38	-1.359	17	-0.33	0.371	6169	0.98	2.335	18	0.55	0.709	11480	1.011	9.455	12	2.73	0.997	15027	1.026
C19orf40	-11.782	18	-2.777	0.003	308	0.145	-36.215	17	-8.783	0	6	0	-10.968	12	-3.166	0.001	223	0.054
C19orf43	-3.679	15	-0.95	0.171	3515	0.794	-21.249	15	-5.486	0	34	0	11.093	10	3.508	1	15304	1.01
C19orf44	-1.748	17	-0.424	0.336	5707	0.96	7.189	18	1.694	0.955	15029	1.04	-5.732	10	-1.813	0.035	1505	0.359
C19orf45	-5.197	18	-1.225	0.11	2601	0.692	-1.06	18	-0.25	0.401	7517	0.874	-6.88	12	-1.986	0.024	1191	0.305
C19orf47	-6.239	18	-1.47	0.071	1968	0.586	2.526	18	0.595	0.724	11680	1.015	-7.499	12	-2.165	0.015	910	0.258
C19orf48	1.802	12	0.52	0.699	10447	1.091	4.163	12	1.202	0.885	13841	1.047	0.082	8	0.029	0.512	8145	0.972
C19orf52	2.374	18	0.559	0.712	10642	1.091	-5.841	18	-1.377	0.084	2740	0.504	4.756	10	1.504	0.934	13467	1.072
C19orf53	1.826	15	0.472	0.681	10225	1.087	-4.854	15	-1.253	0.105	3140	0.548	-3.36	9	-1.12	0.131	3368	0.603
C19orf54	-5.302	17	-1.286	0.099	2420	0.669	0.577	18	0.136	0.554	9508	0.954	-1.637	12	-0.473	0.318	5969	0.825
C19orf55	-7.152	18	-1.686	0.046	1504	0.498	-0.077	18	-0.018	0.493	8731	0.924	-4.614	12	-1.332	0.091	2710	0.522
C19orf57	9.152	17	2.22	0.987	15486	1.039	-8.224	18	-1.938	0.026	1427	0.302	5.866	12	1.693	0.955	13840	1.067
C19orf59	-1.641	18	-0.387	0.349	5884	0.969	-2.324	16	-0.581	0.281	5860	0.784	-4.039	11	-1.218	0.112	3051	0.566
C19orf60	8.605	18	2.028	0.979	15237	1.048	5.103	18	1.203	0.885	13843	1.047	4.874	12	1.407	0.92	13239	1.075
C19orf66	-1.408	17	-0.341	0.366	6115	0.977	-3.241	18	-0.764	0.222	5023	0.725	-0.944	12	-0.273	0.393	6851	0.886
C19orf67	-3.707	18	-0.874	0.191	3828	0.814	-10.714	18	-2.525	0.006	660	0.143	0.118	12	0.034	0.514	8175	0.972
C19orf68	4.414	18	1.04	0.851	12735	1.09	2.439	18	0.575	0.717	11591	1.013	1.144	12	0.33	0.629	9514	1.023
C19orf69	-7.132	12	-2.059	0.02	898	0.359	-0.264	12	-0.076	0.47	8461	0.909	-1.095	8	-0.387	0.349	6362	0.849
C19orf70	3.914	18	0.923	0.822	12284	1.091	-7.914	18	-1.865	0.031	1558	0.326	6.652	12	1.92	0.973	14208	1.059
C19orf71	1.702	18	0.401	0.656	9859	1.085	-4.88	18	-1.15	0.125	3494	0.586	2.753	12	0.795	0.787	11393	1.068
C19orf73	-3.207	12	-0.926	0.177	3615	0.8	4.056	12	1.171	0.879	13752	1.047	0.958	8	0.339	0.633	9549	1.025
C19orf77	-0.471	12	-0.136	0.446	7074	1.028	1.103	12	0.318	0.625	10397	0.984	-4.573	8	-1.617	0.053	1922	0.426
C19orf80	-4.041	17	-0.98	0.163	3398	0.785	-8.929	18	-2.105	0.018	1168	0.248	-0.753	12	-0.217	0.414	7088	0.903
C19orf81	12.641	18	2.979	0.999	16064	1.014	-1.44	18	-0.339	0.367	7061	0.851	8.403	12	2.426	0.992	14819	1.036
C1orf101	2.768	18	0.652	0.743	11086	1.093	2.592	18	0.611	0.729	11747	1.016	-1.668	12	-0.481	0.315	5921	0.823
C1orf105	-3.786	15	-0.978	0.164	3406	0.786	9.693	15	2.503	0.994	15973	1.019	0.003	10	0.001	0.5	8020	0.965
C1orf106	0.029	18	0.007	0.503	7832	1.047	1.929	18	0.455	0.675	11030	1.002	-6.235	12	-1.8	0.036	1526	0.364
C1orf109	2.534	16	0.633	0.737	10997	1.093	0.723	17	0.175	0.57	9699	0.961	-0.523	6	-0.213	0.416	7108	0.904
C1orf110	-0.667	15	-0.172	0.432	6914	1.018	-2.62	15	-0.677	0.249	5410	0.755	-5.976	10	-1.89	0.029	1383	0.329
C1orf111	-4.017	15	-1.037	0.15	3205	0.763	-5.82	15	-1.503	0.066	2362	0.461	0.157	8	0.056	0.522	8270	0.977
C1orf112	3.642	17	0.883	0.811	12117	1.092	-11.623	18	-2.74	0.003	496	0.102	-8.348	12	-2.41	0.008	653	0.189
C1orf115	-0.862	18	-0.203	0.419	6764	1.012	-2.161	18	-0.509	0.305	6190	0.807	0.834	12	0.241	0.595	9127	1.009
C1orf116	-0.172	18	-0.041	0.484	7578	1.041	-10.581	18	-2.494	0.006	683	0.151	3.72	12	1.074	0.859	12365	1.074
C1orf122	-7.905	15	-2.041	0.021	921	0.365	-3.584	15	-0.925	0.177	4340	0.669	4.139	10	1.309	0.905	13018	1.075
C1orf123	-1.356	18	-0.32	0.375	6225	0.981	-1.751	18	-0.413	0.34	6679	0.833	-4.861	12	-1.403	0.08	2500	0.497
C1orf127	13.53	18	3.189	0.999	16127	1.011	6.266	18	1.477	0.93	14565	1.045	0.668	12	0.193	0.576	8888	1.003
C1orf131	-4.849	15	-1.252	0.105	2532	0.678	-8.972	16	-2.243	0.012	980	0.208	-1.399	10	-0.442	0.329	6108	0.833
C1orf145	1.992	9	0.664	0.747	11144	1.093	-0.789	9	-0.263	0.396	7465	0.869	-2.117	6	-0.864	0.194	4325	0.693
C1orf146	1.706	9	0.569	0.715	10695	1.091	-2.242	9	-0.747	0.227	5106	0.729	-8.547	6	-3.489	0	140	0.027
C1orf147	-3.819	15	-0.986	0.162	3374	0.783	-4.942	15	-1.276	0.101	3059	0.54	-1.491	10	-0.472	0.319	5976	0.825
C1orf158	-1.09	18	-0.257	0.399	6539	0.994	-13.058	18	-3.078	0.001	317	0.054	-6.488	12	-1.873	0.031	1410	0.335
C1orf159	5.308	18	1.251	0.895	13474	1.083	-5.537	18	-1.305	0.096	2959	0.531	1.179	12	0.34	0.633	9556	1.025
C1orf162	5.213	15	1.346	0.911	13754	1.08	-5.731	15	-1.48	0.069	2433	0.468	0.022	10	0.007	0.503	8045	0.967
C1orf167	-1.513	18	-0.357	0.361	6033	0.975	-8.508	18	-2.005	0.022	1319	0.279	-4.173	12	-1.205	0.114	3097	0.57
C1orf168	-5.007	15	-1.293	0.098	2402	0.666	-2.738	15	-0.707	0.24	5292	0.742	2.354	10	0.744	0.772	11202	1.065
C1orf172	3.807	18	0.897	0.815	12186	1.091	0.251	18	0.059	0.524	9121	0.94	6.463	12	1.866	0.969	14130	1.061
C1orf173	1.866	18	0.44	0.67	10039	1.089	5.537	18	1.305	0.904	14120	1.048	-1.898	12	-0.548	0.292	5632	0.802
C1orf174	-2.03	15	-0.524	0.3	5238	0.935	5.345	15	1.38	0.916	14348	1.045	0.252	10	0.08	0.532	8395	0.98
C1orf177	-4.168	18	-0.983	0.163	3385	0.785	-1.264	18	-0.298	0.383	7285	0.86	4.345	12	1.254	0.895	12875	1.075
C1orf186	0.365	9	0.122	0.548	8422	1.062	4.939	8	1.746	0.96	15117	1.039	-0.822	6	-0.336	0.369	6579	0.866
C1orf189	1.79	12	0.517	0.697	10437	1.09	2.774	12	0.801	0.788	12499	1.033	6.093	8	2.154	0.984	14517	1.049
C1orf192	-0.559	15	-0.144	0.443	7038	1.026	-2.26	15	-0.584	0.28	5845	0.784	-0.431	10	-0.136	0.446	7416	0.93
C1orf194	-1.567	14	-0.419	0.338	5734	0.96	-0.787	15	-0.203	0.419	7789	0.882	6.447	10	2.039	0.979	14373	1.054
C1orf198	8.95	18	2.11	0.983	15350	1.044	10.124	18	2.386	0.991	15889	1.022	5.811	12	1.677	0.953	13807	1.068
C1orf200	3.488	9	1.163	0.877	13202	1.084	-3.617	9	-1.206	0.114	3302	0.565	-4.422	6	-1.805	0.036	1520	0.362
C1orf204	-2.18	9	-0.727	0.234	4383	0.87	-2.241	9	-0.747	0.228	5108	0.729	1.46	6	0.596	0.724	10592	1.058
C1orf21	0.635	9	0.212	0.584	8909	1.069	-2.746	9	-0.915	0.18	4378	0.673	0.148	6	0.06	0.524	8298	0.977
C1orf210	-4.509	12	-1.302	0.097	2380	0.661	-0.204	12	-0.059	0.476	8553	0.912	-1.801	8	-0.637	0.262	5250	0.772
C1orf216	4.605	14	1.231	0.891	13416	1.083	-13.222	15	-3.414	0	214	0.024	1.866	9	0.622	0.733	10707	1.059
C1orf222	-2.215	9	-0.738	0.23	4339	0.865	1.638	9	0.546	0.708	11463	1.01	1.29	6	0.527	0.701	10336	1.049
C1orf226	-11.651	18	-2.746	0.003	324	0.152	7.138	16	1.784	0.963	15180	1.038	7.772	12	2.244	0.988	14616	1.045
C1orf228	-13.616	16	-3.404	0	121	0.045	-6.519	18	-1.536	0.062	2274	0.448	0.274	12	0.079	0.532	8391	0.98
C1orf229	-8.729	9	-2.91	0.002	250	0.118	6.241	9	2.08	0.981	15582	1.031	-2.009	6	-0.82	0.206	4498	0.709
C1orf233	1.47	15	0.379	0.648	9731	1.086	-1.283	15	-0.331	0.37	7102	0.853	9.485	10	2.999	0.999	15160	1.019
C1orf27	1.631	11	0.492	0.689	10335	1.087	-1.092	11	-0.329	0.371	7114	0.854	-5.392	7	-2.038	0.021	1091	0.295
C1orf35	-2.854	18	-0.673	0.251	4604	0.888	-0.391	18	-0.092	0.463	8374	0.906	2.78	12	0.803	0.789	11425	1.068
C1orf43	-9.525	18	-2.245	0.012	700	0.289	-4.738	18	-1.117	0.132	3629	0.596	-5.171	12	-1.493	0.068	2240	0.468
C1orf50	-5.796	12	-1.673	0.047	1525	0.504	2.896	12	0.836	0.798	12607	1.037	1.788	8	0.632	0.736	10750	1.06
C1orf51	4.983	18	1.175	0.88	13250	1.083	-6.096	18	-1.437	0.075	2544	0.485	3.429	12	0.99	0.839	12099	1.072
C1orf52	-11.975	17	-2.904	0.002	253	0.119	-2.608	16	-0.652	0.257	5531	0.761	5.743	10	1.816	0.965	14065	1.062
C1orf53	2.574	18	0.607	0.728	10876	1.092	1.053	18	0.248	0.598	10054	0.974	13.527	12	3.905	1	15374	1.006
C1orf54	9.003	12	2.599	0.995	15859	1.024	1.363	12	0.393	0.653	10749	0.994	-3.817	8	-1.349	0.089	2661	0.515
C1orf56	10.845	12	3.131	0.999	16109	1.012	-10.193	12	-2.942	0.002	383	0.07	7.528	8	2.662	0.996	14984	1.028
C1orf61	-1.478	15	-0.382	0.351	5912	0.969	-0.299	15	-0.077	0.469	8456	0.908	-0.887	10	-0.281	0.39	6816	0.884
C1orf63	5.295	15	1.367	0.914	13823	1.079	-0.903	15	-0.233	0.408	7609	0.877	2.748	10	0.869	0.808	11658	1.071
C1orf64	5.033	18	1.186	0.882	13286	1.083	-11.751	18	-2.77	0.003	481	0.095	-2.044	12	-0.59	0.278	5448	0.788
C1orf65	3.748	18	0.883	0.811	12116	1.092	3.918	18	0.923	0.822	12932	1.041	4.016	12	1.159	0.877	12616	1.075
C1orf68	-4.077	15	-1.053	0.146	3141	0.759	-0.816	15	-0.211	0.417	7736	0.882	0.235	10	0.074	0.53	8362	0.98
C1orf74	-2.072	15	-0.535	0.296	5193	0.931	1.529	15	0.395	0.654	10760	0.994	-3.222	10	-1.019	0.154	3763	0.633
C1orf85	-12.008	16	-3.002	0.001	221	0.099	0.951	18	0.224	0.589	9936	0.97	6.02	11	1.815	0.965	14060	1.062
C1orf86	-1.491	15	-0.385	0.35	5894	0.969	-18.131	15	-4.681	0	65	0	1.923	8	0.68	0.752	10955	1.061
C1orf87	15.982	18	3.767	1	16251	1.004	7.892	18	1.86	0.969	15299	1.036	-2.926	12	-0.845	0.199	4407	0.699
C1orf94	1.881	18	0.443	0.671	10056	1.089	-8.149	18	-1.921	0.027	1452	0.309	0.85	12	0.245	0.597	9156	1.008
C1orf95	4.352	18	1.026	0.847	12680	1.09	0.499	17	0.121	0.548	9435	0.951	-3.462	12	-0.999	0.159	3851	0.638
C1QA	9.452	18	2.228	0.987	15493	1.039	9.984	18	2.353	0.991	15859	1.023	4.101	12	1.184	0.882	12683	1.075
C1QB	0.52	18	0.122	0.549	8424	1.062	-3.344	18	-0.788	0.215	4904	0.719	5.413	12	1.563	0.941	13587	1.071
C1QBP	5.576	12	1.61	0.946	14445	1.068	-0.621	12	-0.179	0.429	7919	0.887	0.47	8	0.166	0.566	8774	0.998
C1QC	-10.429	18	-2.458	0.007	493	0.231	-1.296	18	-0.306	0.38	7241	0.859	8.07	12	2.33	0.99	14702	1.042
C1QL1	0.394	15	0.102	0.54	8314	1.06	-9.232	15	-2.384	0.009	794	0.177	4.475	8	1.582	0.943	13625	1.071
C1QL2	-2.199	15	-0.568	0.285	5061	0.919	1.161	14	0.31	0.622	10349	0.984	7.151	10	2.261	0.988	14639	1.044
C1QL3	3.691	15	0.953	0.83	12410	1.09	4.303	15	1.111	0.867	13567	1.046	0.121	10	0.038	0.515	8188	0.973
C1QL4	-4.01	18	-0.945	0.172	3540	0.794	4.817	18	1.135	0.872	13651	1.046	12.589	12	3.634	1	15333	1.009
C1QTNF1	3.74	18	0.882	0.811	12110	1.092	-10.269	18	-2.421	0.008	754	0.168	4.261	12	1.23	0.891	12817	1.075
C1QTNF2	2.102	18	0.495	0.69	10350	1.087	-0.379	18	-0.089	0.464	8387	0.906	4.51	12	1.302	0.904	13005	1.075
C1QTNF3	4.357	18	1.027	0.848	12683	1.09	1.938	18	0.457	0.676	11039	1.003	-2.96	12	-0.855	0.196	4365	0.696
C1QTNF4	7.223	9	2.408	0.992	15702	1.03	1.605	9	0.535	0.704	11415	1.009	-0.912	6	-0.372	0.355	6424	0.854
C1QTNF5	6.196	14	1.656	0.951	14556	1.066	-3.542	15	-0.915	0.18	4385	0.673	-1.414	10	-0.447	0.327	6082	0.833
C1QTNF6	-0.262	18	-0.062	0.475	7475	1.037	-3.088	18	-0.728	0.233	5195	0.735	0.738	12	0.213	0.584	8979	1.007
C1QTNF7	-5.056	15	-1.305	0.096	2369	0.66	-6.299	15	-1.627	0.052	2051	0.414	-1.098	10	-0.347	0.364	6534	0.862
C1QTNF8	-5.911	18	-1.393	0.082	2141	0.623	-2.609	18	-0.615	0.269	5719	0.771	5.311	12	1.533	0.937	13531	1.071
C1RL	-4.349	18	-1.025	0.153	3249	0.766	4.757	18	1.121	0.869	13600	1.046	-1.622	12	-0.468	0.32	5993	0.825
C1S	-2.455	18	-0.579	0.281	5006	0.917	3.508	18	0.827	0.796	12584	1.035	-7.9	12	-2.28	0.011	767	0.228
C2	-2.378	18	-0.56	0.288	5087	0.922	-3.243	18	-0.764	0.222	5021	0.725	2.996	12	0.865	0.806	11642	1.071
C20orf112	11.795	18	2.78	0.997	15966	1.019	7.111	18	1.676	0.953	15001	1.04	-6.386	12	-1.844	0.033	1456	0.347
C20orf141	4.788	15	1.236	0.892	13431	1.083	1.153	15	0.298	0.617	10296	0.981	2.105	10	0.666	0.747	10896	1.061
C20orf144	0.354	17	0.086	0.534	8242	1.057	4.214	18	0.993	0.84	13177	1.043	8.734	12	2.521	0.994	14895	1.032
C20orf166	5.075	18	1.196	0.884	13323	1.082	3.623	18	0.854	0.803	12677	1.037	0.183	12	0.053	0.521	8260	0.976
C20orf173	9.067	18	2.137	0.984	15389	1.043	-12.338	18	-2.908	0.002	401	0.074	-0.671	12	-0.194	0.423	7177	0.912
C20orf194	-0.689	18	-0.163	0.435	6963	1.02	1.942	18	0.458	0.676	11043	1.003	3.364	12	0.971	0.834	12043	1.071
C20orf195	0.247	18	0.058	0.523	8094	1.054	3.255	18	0.767	0.779	12382	1.029	8.282	12	2.391	0.992	14778	1.038
C20orf196	-1.339	9	-0.446	0.328	5580	0.958	15.781	9	5.26	1	16368	1	2.901	6	1.185	0.882	12685	1.075
C20orf197	-1.532	10	-0.484	0.314	5418	0.945	-3.597	12	-1.038	0.15	3924	0.624	0.182	8	0.064	0.526	8324	0.977
C20orf201	1.897	15	0.49	0.688	10321	1.087	6.854	15	1.77	0.962	15152	1.039	-5.379	10	-1.701	0.044	1750	0.393
C20orf202	-1.66	18	-0.391	0.348	5862	0.968	0.15	17	0.036	0.514	9014	0.934	1.122	12	0.324	0.627	9479	1.023
C20orf24	-2.373	18	-0.559	0.288	5090	0.923	-6.317	18	-1.489	0.068	2405	0.465	-3.685	12	-1.064	0.144	3588	0.619
C20orf26	2.389	18	0.563	0.713	10666	1.091	-0.307	18	-0.072	0.471	8486	0.909	0.009	12	0.003	0.501	8026	0.966
C20orf27	-1.755	17	-0.426	0.335	5695	0.96	5.352	18	1.261	0.896	14012	1.047	0.394	12	0.114	0.545	8545	0.987
C20orf78	-4.392	15	-1.134	0.128	2871	0.73	4.396	15	1.135	0.872	13649	1.046	1.946	10	0.616	0.731	10675	1.059
C20orf85	-7.908	15	-2.042	0.021	919	0.365	11.37	15	2.936	0.998	16191	1.009	2.334	10	0.738	0.77	11183	1.065
C20orf96	-5.41	18	-1.275	0.101	2454	0.672	-2.656	18	-0.626	0.266	5670	0.767	0.895	12	0.258	0.602	9203	1.012
C21orf128	2.386	15	0.616	0.731	10919	1.092	-2.515	15	-0.649	0.258	5545	0.762	0.233	9	0.078	0.531	8379	0.98
C21orf2	-5.854	15	-1.512	0.065	1855	0.574	-2.743	15	-0.708	0.239	5278	0.743	12.848	10	4.063	1	15401	1.004
C21orf33	3.307	18	0.779	0.782	11643	1.096	-2.287	18	-0.539	0.295	6053	0.798	6.598	12	1.905	0.972	14178	1.06
C21orf58	-1.167	15	-0.301	0.382	6316	0.985	-5.835	17	-1.415	0.078	2613	0.492	-2.482	10	-0.785	0.216	4637	0.721
C21orf59	-9.023	15	-2.33	0.01	614	0.263	-5.637	15	-1.455	0.073	2503	0.476	0.178	10	0.056	0.522	8272	0.977
C21orf62	-1.955	12	-0.564	0.286	5078	0.919	0.27	12	0.078	0.531	9224	0.942	-3.556	8	-1.257	0.104	2933	0.55
C21orf91	-3.333	12	-0.962	0.168	3455	0.793	-0.068	12	-0.02	0.492	8725	0.923	5.789	8	2.047	0.98	14387	1.053
C22orf15	3.932	18	0.927	0.823	12305	1.091	5.263	18	1.24	0.893	13948	1.048	-0.045	12	-0.013	0.495	7969	0.96
C22orf23	2.317	17	0.562	0.713	10658	1.091	2.056	18	0.485	0.686	11184	1.004	4.931	12	1.423	0.923	13279	1.075
C22orf24	-2.156	12	-0.622	0.267	4826	0.902	-0.058	12	-0.017	0.493	8737	0.924	-0.825	8	-0.292	0.385	6755	0.882
C22orf26	-1.059	9	-0.353	0.362	6057	0.975	-4.639	9	-1.546	0.061	2253	0.443	-1.151	6	-0.47	0.319	5984	0.825
C22orf29	8.75	18	2.062	0.98	15282	1.046	5.369	18	1.265	0.897	14026	1.047	2.618	12	0.756	0.775	11255	1.065
C22orf31	-4.868	18	-1.147	0.126	2831	0.724	1.548	18	0.365	0.642	10606	0.992	5.192	12	1.499	0.933	13455	1.073
C22orf39	-1.418	18	-0.334	0.369	6149	0.979	-5.619	18	-1.325	0.093	2898	0.523	-3.663	12	-1.058	0.145	3615	0.621
C22orf46	1.509	17	0.366	0.643	9654	1.086	-0.27	18	-0.064	0.475	8528	0.911	5.285	11	1.594	0.944	13642	1.071
C2CD2	-4.446	15	-1.148	0.126	2830	0.723	-5.76	15	-1.487	0.068	2413	0.464	2.134	9	0.711	0.762	11079	1.063
C2CD2L	4.183	15	1.08	0.86	12883	1.089	1.571	15	0.406	0.657	10811	0.996	3.251	9	1.084	0.861	12399	1.074
C2CD3	11.835	18	2.79	0.997	15969	1.019	-3.592	18	-0.847	0.199	4659	0.698	2.374	12	0.685	0.753	10973	1.062
C2CD4A	12.141	15	3.135	0.999	16111	1.011	0.242	15	0.062	0.525	9141	0.94	-4.382	10	-1.386	0.083	2549	0.503
C2CD4B	4.894	15	1.264	0.897	13511	1.083	4.332	15	1.119	0.868	13592	1.046	-5.798	10	-1.834	0.033	1468	0.351
C2CD4C	-6.035	12	-1.742	0.041	1394	0.477	7.491	12	2.162	0.985	15661	1.029	1.509	8	0.533	0.703	10364	1.049
C2CD4D	2.046	14	0.547	0.708	10579	1.091	7.643	15	1.973	0.976	15448	1.034	-0.579	10	-0.183	0.427	7222	0.915
C2CD5	-0.592	18	-0.14	0.444	7057	1.027	7.269	18	1.713	0.957	15058	1.04	-3.808	12	-1.099	0.136	3453	0.608
C2orf16	7.103	18	1.674	0.953	14604	1.064	6.981	18	1.645	0.95	14933	1.041	-3.89	12	-1.123	0.131	3359	0.602
C2orf42	4.994	18	1.177	0.88	13260	1.083	0.467	18	0.11	0.544	9379	0.949	-3.131	12	-0.904	0.183	4175	0.678
C2orf43	-2.534	15	-0.654	0.256	4693	0.891	-4.5	15	-1.162	0.123	3461	0.58	-2.257	10	-0.714	0.238	4945	0.744
C2orf44	-0.111	12	-0.032	0.487	7623	1.042	3.091	12	0.892	0.814	12806	1.04	-6.054	8	-2.14	0.016	950	0.263
C2orf47	-0.599	15	-0.155	0.439	6997	1.022	-1.476	15	-0.381	0.352	6842	0.841	6.206	10	1.963	0.975	14266	1.057
C2orf48	4.417	18	1.041	0.851	12742	1.089	0.251	18	0.059	0.524	9120	0.94	-13.684	11	-4.126	0	48	0.006
C2orf49	13.979	18	3.295	1	16161	1.009	-1.759	18	-0.415	0.339	6667	0.833	11.079	11	3.34	1	15268	1.013
C2orf50	8.831	12	2.549	0.995	15822	1.025	2.013	12	0.581	0.719	11626	1.013	-1.242	6	-0.507	0.306	5801	0.816
C2orf53	0.743	18	0.175	0.57	8706	1.067	-0.735	18	-0.173	0.431	7943	0.889	-0.131	12	-0.038	0.485	7855	0.955
C2orf54	4.856	18	1.144	0.874	13126	1.086	-3.96	18	-0.933	0.175	4307	0.666	0.818	12	0.236	0.593	9107	1.008
C2orf57	-4.104	12	-1.185	0.118	2705	0.712	3.28	12	0.947	0.828	13021	1.041	3.486	8	1.232	0.891	12821	1.075
C2orf61	-0.81	17	-0.196	0.422	6793	1.014	-1.592	18	-0.375	0.354	6871	0.843	4.62	12	1.334	0.909	13062	1.076
C2orf62	1.944	18	0.458	0.677	10145	1.088	-3.164	17	-0.767	0.221	5009	0.724	-3.514	12	-1.014	0.155	3788	0.634
C2orf68	1.306	18	0.308	0.621	9391	1.078	-3.448	18	-0.813	0.208	4796	0.711	1.596	12	0.461	0.677	10075	1.04
C2orf69	-9.132	12	-2.636	0.004	371	0.184	-4.215	12	-1.217	0.112	3251	0.563	-4.246	8	-1.501	0.067	2209	0.467
C2orf70	3.475	18	0.819	0.794	11836	1.094	-12.777	18	-3.012	0.001	348	0.061	-8.923	12	-2.576	0.005	531	0.146
C2orf71	7.238	18	1.706	0.956	14678	1.062	-9.202	18	-2.169	0.015	1081	0.228	4.942	11	1.49	0.932	13436	1.073
C2orf72	-2.885	18	-0.68	0.248	4574	0.885	4.734	17	1.148	0.875	13687	1.046	0.872	11	0.263	0.604	9226	1.012
C2orf73	6.349	18	1.496	0.933	14163	1.074	3.398	18	0.801	0.788	12501	1.032	3.699	12	1.068	0.857	12341	1.074
C2orf74	-3.154	9	-1.051	0.147	3146	0.76	1.751	9	0.584	0.72	11634	1.013	0.997	6	0.407	0.658	9861	1.032
C2orf78	-1.088	18	-0.256	0.399	6542	0.994	1.56	18	0.368	0.643	10623	0.992	-0.821	12	-0.237	0.406	7000	0.898
C2orf80	-6.004	9	-2.001	0.023	975	0.379	0.81	9	0.27	0.606	10152	0.978	-0.083	6	-0.034	0.487	7871	0.956
C2orf81	-0.663	16	-0.166	0.434	6947	1.019	9.18	18	2.164	0.985	15664	1.029	-0.533	10	-0.168	0.433	7272	0.921
C2orf82	6.205	18	1.463	0.928	14072	1.076	-6.782	18	-1.599	0.055	2118	0.425	-1.11	12	-0.32	0.374	6645	0.871
C2orf83	-2.535	18	-0.597	0.275	4945	0.907	-3.596	18	-0.848	0.198	4657	0.697	0.477	12	0.138	0.555	8648	0.992
C2orf91	-0.443	9	-0.148	0.441	7022	1.025	-4.578	9	-1.526	0.063	2302	0.452	-2.722	6	-1.111	0.133	3399	0.606
C3	0.773	16	0.193	0.577	8809	1.068	-0.907	17	-0.22	0.413	7680	0.88	-3.45	12	-0.996	0.16	3861	0.64
C3AR1	-2.064	18	-0.486	0.313	5412	0.944	-4.652	18	-1.097	0.136	3706	0.603	6.342	12	1.831	0.966	14090	1.061
C3orf14	-1.767	12	-0.51	0.305	5303	0.938	-1.954	12	-0.564	0.286	5935	0.79	-4.294	8	-1.518	0.064	2155	0.463
C3orf18	15.787	15	4.076	1	16278	1.002	0.339	15	0.087	0.535	9277	0.944	-6.01	10	-1.9	0.029	1362	0.326
C3orf20	2.819	18	0.665	0.747	11145	1.093	-1.542	18	-0.363	0.358	6934	0.846	2.027	12	0.585	0.721	10551	1.057
C3orf22	0.135	18	0.032	0.513	7968	1.049	-2.683	18	-0.632	0.264	5638	0.765	2.024	12	0.584	0.72	10548	1.056
C3orf30	-4.401	15	-1.136	0.128	2862	0.729	-3.329	15	-0.86	0.195	4597	0.694	3.828	10	1.21	0.887	12756	1.075
C3orf33	-2.879	9	-0.96	0.169	3464	0.794	2.397	9	0.799	0.788	12489	1.033	-0.487	6	-0.199	0.421	7161	0.91
C3orf36	1.37	8	0.484	0.686	10285	1.088	3.395	9	1.132	0.871	13637	1.046	2.386	6	0.974	0.835	12051	1.072
C3orf37	-0.798	18	-0.188	0.425	6840	1.014	5.601	18	1.32	0.907	14168	1.048	4.399	12	1.27	0.898	12914	1.075
C3orf38	-8.822	12	-2.547	0.005	439	0.202	-2.332	12	-0.673	0.25	5425	0.756	1.579	8	0.558	0.712	10435	1.055
C3orf52	-6.6	15	-1.704	0.044	1471	0.49	-0.662	15	-0.171	0.432	7963	0.888	2.591	10	0.819	0.794	11483	1.069
C3orf56	11.499	14	3.073	0.999	16093	1.012	0.42	15	0.108	0.543	9369	0.949	0.952	10	0.301	0.618	9396	1.018
C3orf58	3.496	18	0.824	0.795	11861	1.093	2.151	18	0.507	0.694	11282	1.007	4.02	12	1.161	0.877	12625	1.075
C3orf62	0.136	12	0.039	0.516	7998	1.051	-2.325	12	-0.671	0.251	5441	0.755	-6.08	8	-2.15	0.016	940	0.26
C3orf67	7.264	18	1.712	0.957	14691	1.062	0.414	18	0.097	0.539	9320	0.946	-3.221	12	-0.93	0.176	4093	0.666
C3orf70	-6.727	17	-1.631	0.051	1608	0.521	5.695	18	1.342	0.91	14230	1.047	-0.224	12	-0.065	0.474	7743	0.947
C3orf72	2.145	18	0.506	0.693	10388	1.089	4.967	18	1.171	0.879	13751	1.047	-6.809	12	-1.966	0.025	1231	0.31
C3orf80	-5.211	15	-1.345	0.089	2252	0.646	1.941	15	0.501	0.692	11258	1.006	3.378	10	1.068	0.857	12342	1.074
C4A	1.58	9	0.527	0.701	10479	1.091	5.613	9	1.871	0.969	15311	1.036	-2.245	6	-0.916	0.18	4140	0.671
C4BPA	6.291	17	1.526	0.936	14250	1.072	3.507	18	0.827	0.796	12583	1.035	1.171	12	0.338	0.632	9545	1.025
C4BPB	-0.026	12	-0.007	0.497	7759	1.045	-1.979	12	-0.571	0.284	5902	0.787	-1.579	7	-0.597	0.275	5414	0.786
C4orf17	1.843	12	0.532	0.703	10507	1.091	2.776	12	0.801	0.789	12503	1.032	-9.545	8	-3.375	0	169	0.034
C4orf19	5.785	15	1.494	0.932	14158	1.074	-2.37	15	-0.612	0.27	5733	0.772	-5.58	10	-1.764	0.039	1598	0.376
C4orf21	-5.215	17	-1.265	0.103	2486	0.676	-30.066	18	-7.087	0	16	0	-7.146	12	-2.063	0.02	1057	0.286
C4orf22	-2.371	18	-0.559	0.288	5094	0.922	-11.158	18	-2.63	0.004	577	0.121	0.245	12	0.071	0.528	8354	0.978
C4orf26	0.159	9	0.053	0.521	8066	1.054	3.951	9	1.317	0.906	14160	1.047	-6.444	6	-2.631	0.004	498	0.132
C4orf29	-5.035	15	-1.3	0.097	2386	0.662	7.304	15	1.886	0.97	15331	1.036	0.412	10	0.13	0.552	8614	0.991
C4orf3	-0.571	18	-0.134	0.447	7083	1.028	4.059	18	0.957	0.831	13052	1.042	4.886	12	1.411	0.921	13244	1.075
C4orf32	-5.877	9	-1.959	0.025	1045	0.391	3.23	9	1.077	0.859	13465	1.045	7.025	6	2.868	0.998	15107	1.022
C4orf47	0.461	9	0.154	0.561	8592	1.065	2.845	9	0.948	0.828	13029	1.041	-5.442	6	-2.222	0.013	841	0.242
C4orf48	-2.115	12	-0.611	0.271	4880	0.905	-1.891	12	-0.546	0.293	6016	0.796	3.947	8	1.396	0.919	13217	1.075
C4orf50	-4.776	18	-1.126	0.13	2896	0.733	3.692	18	0.87	0.808	12735	1.038	6.62	12	1.911	0.972	14188	1.06
C4orf51	-9.589	12	-2.768	0.003	313	0.147	-2.742	12	-0.792	0.214	4880	0.719	0.386	8	0.136	0.554	8641	0.992
C5	2.309	18	0.544	0.707	10566	1.091	8.394	18	1.978	0.976	15456	1.034	-0.792	12	-0.229	0.41	7036	0.9
C5AR1	1.862	12	0.537	0.704	10532	1.091	8.13	12	2.347	0.991	15856	1.023	-6.701	8	-2.369	0.009	692	0.199
C5AR2	3.663	18	0.863	0.806	12029	1.093	-3.169	18	-0.747	0.228	5109	0.729	-2.339	12	-0.675	0.25	5110	0.756
C5orf15	6.866	15	1.773	0.962	14802	1.06	1.83	15	0.472	0.682	11118	1.004	0.285	9	0.095	0.538	8472	0.982
C5orf20	-1.705	9	-0.568	0.285	5056	0.919	4.104	9	1.368	0.914	14308	1.046	1.337	6	0.546	0.707	10403	1.052
C5orf22	-6.384	11	-1.925	0.027	1090	0.406	3.344	12	0.965	0.833	13088	1.042	4.359	8	1.541	0.938	13546	1.071
C5orf24	1.828	9	0.609	0.729	10886	1.092	-1	9	-0.333	0.369	7085	0.853	3.49	6	1.425	0.923	13284	1.075
C5orf30	-2.772	12	-0.8	0.212	4096	0.844	0.97	12	0.28	0.61	10205	0.979	1.138	8	0.402	0.656	9847	1.031
C5orf34	-2.838	12	-0.819	0.206	4015	0.838	8.236	12	2.377	0.991	15885	1.022	-4.709	8	-1.665	0.048	1813	0.409
C5orf38	-2.915	18	-0.687	0.246	4541	0.884	0.683	18	0.161	0.564	9623	0.959	2.766	12	0.798	0.788	11407	1.068
C5orf42	1.076	18	0.254	0.6	9111	1.074	-8.152	18	-1.922	0.027	1449	0.309	2.35	12	0.678	0.751	10946	1.062
C5orf45	-11.855	18	-2.794	0.003	298	0.142	8.212	18	1.936	0.974	15398	1.035	-5.823	12	-1.681	0.046	1789	0.401
C5orf47	-3.737	12	-1.079	0.14	3058	0.749	2.694	12	0.778	0.782	12421	1.03	-0.721	7	-0.273	0.393	6850	0.886
C5orf49	0.647	12	0.187	0.574	8778	1.067	-4.201	12	-1.213	0.113	3267	0.564	7.565	8	2.675	0.996	14992	1.028
C5orf51	3.035	14	0.811	0.791	11796	1.094	2.005	15	0.518	0.698	11335	1.008	-3.497	10	-1.106	0.134	3416	0.608
C5orf52	5.95	18	1.402	0.92	13908	1.078	2.283	18	0.538	0.705	11429	1.009	4.948	12	1.428	0.923	13294	1.074
C5orf54	2.468	9	0.823	0.795	11854	1.093	-3.767	9	-1.256	0.105	3133	0.547	-3.224	6	-1.316	0.094	2749	0.529
C5orf55	-8.88	12	-2.563	0.005	425	0.199	2.941	12	0.849	0.802	12665	1.037	-2.486	8	-0.879	0.19	4262	0.689
C5orf56	3.25	18	0.766	0.778	11592	1.095	-4.051	18	-0.955	0.17	4226	0.658	-0.554	10	-0.175	0.431	7245	0.919
C6	5.973	18	1.408	0.92	13923	1.078	3.163	18	0.746	0.772	12292	1.028	-0.8	12	-0.231	0.409	7025	0.9
C6orf10	0.546	8	0.193	0.576	8806	1.068	-6.765	9	-2.255	0.012	952	0.208	-4.989	6	-2.037	0.021	1097	0.294
C6orf100	4.739	8	1.675	0.953	14609	1.064	-3.36	9	-1.12	0.131	3615	0.595	4.434	6	1.81	0.965	14052	1.062
C6orf118	1.436	18	0.338	0.633	9527	1.083	-0.088	18	-0.021	0.492	8716	0.923	1.572	12	0.454	0.675	10046	1.039
C6orf120	7.22	15	1.864	0.969	14994	1.054	-0.845	15	-0.218	0.414	7694	0.88	-5.687	10	-1.798	0.036	1528	0.365
C6orf132	-1.621	16	-0.405	0.343	5802	0.963	2.161	18	0.509	0.695	11298	1.007	1.489	12	0.43	0.666	9950	1.036
C6orf136	7.359	18	1.735	0.959	14731	1.061	3.329	17	0.807	0.79	12528	1.033	-6.012	12	-1.735	0.041	1674	0.382
C6orf141	-3.976	17	-0.964	0.167	3450	0.792	-2.936	18	-0.692	0.244	5357	0.747	-11.498	12	-3.319	0	184	0.038
C6orf15	4.314	15	1.114	0.867	13014	1.087	2.068	15	0.534	0.703	11411	1.009	-3.788	10	-1.198	0.115	3120	0.572
C6orf163	-3.029	16	-0.757	0.224	4258	0.86	5.852	18	1.379	0.916	14344	1.046	-2.067	12	-0.597	0.275	5416	0.786
C6orf165	-0.917	15	-0.237	0.406	6633	0.999	-0.386	15	-0.1	0.46	8328	0.905	0.051	10	0.016	0.506	8094	0.968
C6orf170	-0.231	18	-0.055	0.478	7512	1.038	-2.105	18	-0.496	0.31	6250	0.812	-4.515	12	-1.303	0.096	2783	0.535
C6orf195	5.448	12	1.573	0.942	14372	1.069	4.719	12	1.362	0.913	14290	1.046	-2.881	8	-1.019	0.154	3765	0.634
C6orf201	-1.078	15	-0.278	0.39	6420	0.992	-1.331	15	-0.344	0.366	7037	0.85	1.827	9	0.609	0.729	10643	1.059
C6orf211	-2.537	12	-0.732	0.232	4363	0.867	1.385	12	0.4	0.655	10783	0.995	-2.655	8	-0.939	0.174	4067	0.662
C6orf222	-0.277	18	-0.065	0.474	7459	1.036	1.256	18	0.296	0.616	10293	0.98	0.491	12	0.142	0.556	8668	0.993
C6orf223	-5.973	11	-1.801	0.036	1280	0.457	0.497	12	0.144	0.557	9548	0.955	-2.533	7	-0.957	0.169	3994	0.655
C6orf226	1.269	12	0.366	0.643	9657	1.086	-2.844	12	-0.821	0.206	4763	0.707	0.961	8	0.34	0.633	9554	1.025
C6orf25	-7.752	18	-1.827	0.034	1217	0.453	3.93	18	0.926	0.823	12936	1.041	-7.308	11	-2.203	0.014	869	0.245
C6orf47	-0.165	15	-0.043	0.483	7572	1.04	-2.992	15	-0.772	0.22	4985	0.722	-0.742	10	-0.235	0.407	7011	0.898
C6orf52	0.784	15	0.203	0.58	8859	1.068	-3.656	15	-0.944	0.173	4262	0.663	-2.988	10	-0.945	0.172	4045	0.659
C6orf58	7.369	15	1.903	0.971	15053	1.053	-0.18	15	-0.046	0.481	8607	0.916	-5.075	10	-1.605	0.054	1949	0.43
C6orf62	-0.937	15	-0.242	0.404	6605	0.999	6.445	15	1.664	0.952	14972	1.041	0.171	10	0.054	0.522	8264	0.976
C6orf70	9.678	18	2.281	0.989	15573	1.036	-10.462	18	-2.466	0.007	711	0.157	-9.948	11	-2.999	0.001	284	0.074
C6orf89	-0.21	18	-0.05	0.48	7534	1.04	-14.313	18	-3.374	0	227	0.027	-1.232	12	-0.356	0.361	6495	0.86
C6orf99	11.578	18	2.729	0.997	15926	1.021	5.246	18	1.236	0.892	13938	1.047	4.176	11	1.259	0.896	12882	1.076
C7	-2.743	17	-0.665	0.253	4636	0.89	0.58	18	0.137	0.554	9512	0.954	-0.972	12	-0.281	0.39	6815	0.884
C7orf10	1.908	18	0.45	0.674	10100	1.088	-3.873	18	-0.913	0.181	4394	0.673	1.276	12	0.368	0.644	9686	1.028
C7orf25	6.479	18	1.527	0.937	14255	1.072	2.97	18	0.7	0.758	12118	1.024	-7.247	12	-2.092	0.018	1013	0.278
C7orf26	-11.346	17	-2.752	0.003	321	0.151	-10.272	17	-2.491	0.006	686	0.152	-3.481	11	-1.049	0.147	3642	0.624
C7orf31	-13.832	18	-3.26	0.001	157	0.058	2.531	18	0.597	0.725	11688	1.015	-2.623	12	-0.757	0.224	4758	0.73
C7orf33	6.384	9	2.128	0.983	15377	1.043	4.905	9	1.635	0.949	14907	1.042	0.972	6	0.397	0.654	9818	1.031
C7orf41	0.584	18	0.138	0.555	8509	1.063	-8.557	18	-2.017	0.022	1297	0.276	1.267	12	0.366	0.643	9670	1.028
C7orf43	-7.683	18	-1.811	0.035	1258	0.455	4.349	18	1.025	0.847	13283	1.044	-8.443	12	-2.437	0.007	633	0.181
C7orf49	-3.183	15	-0.822	0.206	4001	0.838	1.254	15	0.324	0.627	10425	0.985	-4.907	10	-1.552	0.06	2064	0.452
C7orf50	-9.247	18	-2.18	0.015	747	0.32	1.32	18	0.311	0.622	10357	0.983	3.259	12	0.941	0.827	11931	1.072
C7orf57	5.527	15	1.427	0.923	13979	1.077	4.08	15	1.054	0.854	13391	1.044	0.178	10	0.056	0.522	8274	0.977
C7orf60	-8.869	18	-2.09	0.018	857	0.348	-1.976	17	-0.479	0.316	6340	0.816	-1.622	12	-0.468	0.32	5994	0.825
C7orf61	-1.98	18	-0.467	0.32	5484	0.953	-5.626	18	-1.326	0.092	2894	0.523	1.088	12	0.314	0.623	9439	1.021
C7orf62	-6.839	15	-1.766	0.039	1353	0.467	1.496	14	0.4	0.655	10781	0.995	0.578	9	0.193	0.576	8891	1.003
C7orf63	-4.398	18	-1.037	0.15	3206	0.763	6.016	18	1.418	0.922	14442	1.045	-4.701	12	-1.357	0.087	2640	0.512
C7orf72	-1.441	18	-0.34	0.367	6126	0.977	-5.118	18	-1.206	0.114	3295	0.566	-2.428	12	-0.701	0.242	4987	0.75
C7orf76	3.225	12	0.931	0.824	12319	1.091	-5.172	12	-1.493	0.068	2392	0.463	4.174	8	1.476	0.93	13399	1.074
C8A	7.176	17	1.74	0.959	14736	1.062	5.663	18	1.335	0.909	14209	1.047	4.171	12	1.204	0.886	12740	1.075
C8B	1.053	16	0.263	0.604	9159	1.075	2.765	18	0.652	0.743	11919	1.02	2.043	12	0.59	0.722	10571	1.057
C8G	17.924	18	4.225	1	16291	1.001	-10.507	17	-2.548	0.005	644	0.138	-0.38	12	-0.11	0.456	7537	0.937
C8orf17	5.073	15	1.31	0.905	13636	1.082	-11.887	15	-3.069	0.001	324	0.054	1.304	10	0.412	0.66	9883	1.033
C8orf31	-6.079	18	-1.433	0.076	2047	0.605	-9.681	18	-2.282	0.011	919	0.2	8.631	11	2.602	0.995	14949	1.03
C8orf33	3.547	14	0.948	0.828	12380	1.091	-1.295	18	-0.305	0.38	7243	0.859	-0.103	11	-0.031	0.488	7884	0.957
C8orf34	5.157	18	1.216	0.888	13375	1.083	-2.291	18	-0.54	0.295	6044	0.798	-9.856	12	-2.845	0.002	356	0.096
C8orf37	-0.134	12	-0.039	0.485	7589	1.041	-8.268	12	-2.387	0.008	791	0.176	-1.446	8	-0.511	0.305	5786	0.814
C8orf47	-1.23	15	-0.317	0.375	6235	0.982	-0.803	15	-0.207	0.418	7762	0.881	0.199	10	0.063	0.525	8312	0.977
C8orf48	0.38	9	0.127	0.55	8442	1.063	-0.126	9	-0.042	0.483	8622	0.917	-1.216	6	-0.496	0.31	5855	0.818
C8orf58	-1.316	18	-0.31	0.378	6277	0.983	-3.973	18	-0.936	0.175	4296	0.665	2.744	12	0.792	0.786	11376	1.068
C8orf74	4.561	18	1.075	0.859	12861	1.089	0.971	17	0.235	0.593	9994	0.971	-5.046	12	-1.457	0.073	2341	0.48
C8orf76	2.112	11	0.637	0.738	11010	1.093	-3.891	12	-1.123	0.131	3596	0.595	-4.136	8	-1.462	0.072	2322	0.478
C8orf82	-1.646	15	-0.425	0.335	5703	0.959	1.191	15	0.307	0.621	10336	0.983	-0.927	10	-0.293	0.385	6752	0.881
C8orf86	-0.625	11	-0.188	0.425	6839	1.014	-2.318	12	-0.669	0.252	5459	0.755	-2.016	8	-0.713	0.238	4950	0.744
C8orf87	-8.833	15	-2.281	0.011	665	0.277	3.697	15	0.955	0.83	13044	1.042	-2.876	10	-0.909	0.182	4159	0.675
C9	5.217	12	1.506	0.934	14190	1.074	3.439	12	0.993	0.84	13174	1.043	0.045	8	0.016	0.506	8091	0.968
C9orf114	0.96	14	0.257	0.601	9127	1.074	5.523	13	1.532	0.937	14691	1.044	-6.994	10	-2.212	0.013	853	0.245
C9orf116	-5.164	15	-1.333	0.091	2290	0.65	2.882	15	0.744	0.772	12280	1.029	5.26	10	1.663	0.952	13780	1.068
C9orf117	1.166	16	0.292	0.615	9297	1.078	0.175	17	0.042	0.517	9042	0.936	-3.095	12	-0.893	0.186	4205	0.683
C9orf131	-1.397	18	-0.329	0.371	6170	0.981	2.425	18	0.572	0.716	11579	1.013	6.325	12	1.826	0.966	14084	1.061
C9orf135	-7.632	12	-2.203	0.014	731	0.308	-4.831	12	-1.395	0.082	2678	0.499	2.402	8	0.849	0.802	11588	1.071
C9orf139	-0.748	17	-0.181	0.428	6875	1.015	-11.094	18	-2.615	0.004	587	0.124	-0.325	12	-0.094	0.463	7608	0.94
C9orf142	-3.029	18	-0.714	0.238	4439	0.873	3.515	18	0.829	0.796	12591	1.035	-4.113	12	-1.187	0.118	3154	0.576
C9orf152	5.123	15	1.323	0.907	13672	1.082	0.483	15	0.125	0.55	9454	0.952	-2.181	10	-0.69	0.245	5041	0.752
C9orf156	6.537	18	1.541	0.938	14288	1.071	-1.604	18	-0.378	0.353	6855	0.842	6.944	12	2.005	0.977	14325	1.055
C9orf163	5.164	18	1.217	0.888	13381	1.083	7.389	18	1.742	0.959	15107	1.039	-0.39	12	-0.113	0.455	7524	0.936
C9orf169	0.207	18	0.049	0.519	8045	1.053	-5.199	18	-1.225	0.11	3226	0.559	1.734	12	0.501	0.692	10234	1.045
C9orf170	2.113	12	0.61	0.729	10891	1.092	7.287	12	2.104	0.982	15606	1.03	-2.319	8	-0.82	0.206	4500	0.709
C9orf171	10.168	18	2.397	0.992	15690	1.031	9.294	18	2.191	0.986	15701	1.028	-0.563	12	-0.162	0.435	7308	0.922
C9orf172	-6.475	18	-1.526	0.063	1826	0.567	5.612	18	1.323	0.907	14179	1.047	3.18	12	0.918	0.821	11845	1.072
C9orf173	9.625	17	2.334	0.99	15632	1.033	16.375	18	3.86	1	16336	1.002	2.366	11	0.713	0.762	11091	1.063
C9orf24	-4.581	18	-1.08	0.14	3049	0.749	2.623	18	0.618	0.732	11778	1.017	-6.185	12	-1.785	0.037	1555	0.369
C9orf3	3.174	18	0.748	0.773	11508	1.095	-3.875	18	-0.913	0.181	4388	0.673	0.727	12	0.21	0.583	8961	1.007
C9orf37	-2.628	15	-0.678	0.249	4582	0.885	-5.325	15	-1.375	0.085	2745	0.505	1.071	10	0.339	0.633	9548	1.025
C9orf38	2.158	9	0.719	0.764	11390	1.094	-2.989	9	-0.996	0.16	4080	0.64	-0.888	6	-0.362	0.359	6471	0.857
C9orf40	-6.7	12	-1.934	0.027	1078	0.402	-6.398	12	-1.847	0.032	1599	0.332	-0.373	8	-0.132	0.448	7439	0.931
C9orf41	-2.659	9	-0.886	0.188	3778	0.81	3.229	9	1.076	0.859	13464	1.045	-1.312	6	-0.535	0.296	5688	0.805
C9orf43	4.865	18	1.147	0.874	13135	1.086	-0.876	18	-0.206	0.418	7770	0.881	-11.287	12	-3.258	0.001	201	0.043
C9orf47	5.321	18	1.254	0.895	13483	1.083	-0.002	18	0	0.5	8830	0.927	-2.154	12	-0.622	0.267	5305	0.779
C9orf50	-1.626	16	-0.407	0.342	5793	0.963	-10.438	17	-2.532	0.006	657	0.141	-7.095	11	-2.139	0.016	952	0.263
C9orf53	-9.21	15	-2.378	0.009	567	0.25	5.744	15	1.483	0.931	14580	1.045	6.041	10	1.91	0.972	14186	1.06
C9orf62	-2.225	17	-0.54	0.295	5176	0.929	-0.333	18	-0.079	0.469	8449	0.908	1.617	12	0.467	0.68	10106	1.04
C9orf64	-7.137	12	-2.06	0.02	894	0.359	-7.646	12	-2.207	0.014	1029	0.217	5.136	8	1.816	0.965	14063	1.062
C9orf66	0.947	15	0.244	0.597	9075	1.072	-1.252	15	-0.323	0.373	7142	0.856	5.59	10	1.768	0.961	13973	1.064
C9orf78	-2	12	-0.577	0.282	5008	0.918	-7.616	12	-2.199	0.014	1037	0.22	4.891	8	1.729	0.958	13893	1.067
C9orf84	5.38	18	1.268	0.898	13519	1.083	-0.372	18	-0.088	0.465	8397	0.907	-2.012	12	-0.581	0.281	5484	0.792
C9orf89	-2.328	18	-0.549	0.292	5137	0.926	1.254	18	0.296	0.616	10287	0.981	-1.617	12	-0.467	0.32	6002	0.825
C9orf9	7.485	15	1.933	0.973	15094	1.052	5.495	15	1.419	0.922	14447	1.045	8.295	10	2.623	0.996	14962	1.029
C9orf91	2.816	18	0.664	0.747	11141	1.093	6.752	18	1.591	0.944	14815	1.043	2.92	12	0.843	0.8	11570	1.07
C9orf96	-6.332	18	-1.493	0.068	1903	0.581	-6.044	18	-1.424	0.077	2591	0.487	-5.003	12	-1.444	0.074	2378	0.483
CA10	0.671	18	0.158	0.563	8610	1.066	-0.336	18	-0.079	0.468	8447	0.908	3.421	12	0.987	0.838	12097	1.072
CA11	-3.328	18	-0.784	0.216	4148	0.851	0.804	18	0.19	0.575	9778	0.963	0.658	11	0.199	0.579	8916	1.004
CA12	5.593	17	1.357	0.913	13793	1.079	-11.603	18	-2.735	0.003	502	0.102	2.226	12	0.643	0.74	10805	1.059
CA13	-5.195	18	-1.225	0.11	2602	0.692	6.37	18	1.502	0.933	14637	1.044	1.84	12	0.531	0.702	10353	1.049
CA14	-2.333	15	-0.602	0.273	4918	0.907	13.599	15	3.511	1	16314	1.003	-2.532	10	-0.801	0.212	4576	0.715
CA2	0.604	18	0.142	0.557	8524	1.065	-1.785	18	-0.421	0.337	6638	0.831	-7.041	12	-2.033	0.021	1104	0.295
CA3	-1.921	18	-0.453	0.325	5541	0.958	1.128	18	0.266	0.605	10135	0.977	5.698	12	1.645	0.95	13742	1.069
CA4	-0.312	18	-0.073	0.471	7409	1.036	-3.428	18	-0.808	0.21	4816	0.712	6.493	11	1.958	0.975	14255	1.058
CA5B	-6.538	15	-1.688	0.046	1500	0.497	-3.832	15	-0.99	0.161	4108	0.642	-0.673	10	-0.213	0.416	7112	0.904
CA6	0.085	17	0.021	0.508	7909	1.048	-11.805	18	-2.783	0.003	471	0.094	0.639	12	0.184	0.573	8853	1.001
CA7	-3.729	18	-0.879	0.19	3804	0.814	3.09	18	0.728	0.767	12216	1.027	-3.341	12	-0.964	0.167	3964	0.653
CA8	2.265	14	0.605	0.728	10864	1.092	-3.52	15	-0.909	0.182	4414	0.674	-2.162	10	-0.684	0.247	5073	0.753
CA9	-7.781	18	-1.834	0.033	1205	0.451	-1.188	18	-0.28	0.39	7382	0.864	-1.516	11	-0.457	0.324	6037	0.83
CAAP1	0.74	18	0.174	0.569	8702	1.067	-7.245	18	-1.708	0.044	1879	0.382	1.35	12	0.39	0.652	9781	1.03
CAB39	1.367	9	0.456	0.676	10133	1.088	4.474	9	1.491	0.932	14606	1.045	4.97	6	2.029	0.979	14354	1.055
CABIN1	-8.537	18	-2.012	0.022	961	0.375	-8.699	18	-2.05	0.02	1250	0.264	-12.949	12	-3.738	0	98	0.015
CABLES1	-5.777	18	-1.362	0.087	2217	0.638	-2.462	18	-0.58	0.281	5864	0.784	7.379	12	2.13	0.983	14486	1.05
CABLES2	-3.222	15	-0.832	0.203	3967	0.833	-4.709	15	-1.216	0.112	3254	0.564	9.793	10	3.097	0.999	15197	1.017
CABP1	3.855	15	0.995	0.84	12588	1.089	3.481	15	0.899	0.816	12842	1.04	1.637	10	0.518	0.698	10302	1.047
CABP2	6.891	17	1.671	0.953	14596	1.065	6.733	18	1.587	0.944	14803	1.044	6.345	11	1.913	0.972	14192	1.059
CABP4	-1.717	18	-0.405	0.343	5806	0.963	-7.812	18	-1.841	0.033	1611	0.333	-0.997	12	-0.288	0.387	6778	0.883
CABP5	8.98	9	2.993	0.999	16069	1.014	-6.436	9	-2.145	0.016	1110	0.235	-10.483	6	-4.28	0	35	0.004
CABP7	-10.552	17	-2.559	0.005	432	0.198	-2.017	18	-0.476	0.317	6366	0.816	1.323	12	0.382	0.649	9752	1.029
CABYR	2.662	18	0.627	0.735	10969	1.093	-3.492	18	-0.823	0.205	4757	0.706	-0.512	12	-0.148	0.441	7360	0.927
CACFD1	9.995	16	2.499	0.994	15785	1.027	0.255	18	0.06	0.524	9128	0.94	1.678	10	0.531	0.702	10349	1.049
CACHD1	-16.048	18	-3.783	0	85	0.015	-4.74	18	-1.117	0.132	3628	0.595	2.696	12	0.778	0.782	11328	1.067
CACNA1A	-2.36	17	-0.572	0.284	5031	0.919	7.838	18	1.847	0.968	15279	1.037	9.604	12	2.772	0.997	15053	1.025
CACNA1B	-3.665	17	-0.889	0.187	3761	0.811	-0.813	18	-0.192	0.424	7853	0.884	-5.474	12	-1.58	0.057	2012	0.438
CACNA1C	2.122	18	0.5	0.692	10365	1.088	0.087	18	0.021	0.508	8927	0.932	2.491	12	0.719	0.764	11111	1.063
CACNA1D	0.627	18	0.148	0.559	8557	1.065	-8.318	18	-1.961	0.025	1386	0.295	8.281	12	2.39	0.992	14777	1.038
CACNA1E	4.994	18	1.177	0.88	13259	1.083	-4.269	18	-1.006	0.157	4041	0.637	7.099	12	2.049	0.98	14390	1.053
CACNA1F	-3.987	18	-0.94	0.174	3562	0.795	-1.37	18	-0.323	0.373	7144	0.856	3.528	12	1.018	0.846	12193	1.073
CACNA1G	-3.226	18	-0.76	0.224	4241	0.86	4.986	18	1.175	0.88	13763	1.047	-0.865	12	-0.25	0.401	6949	0.893
CACNA1H	-1.869	18	-0.44	0.33	5615	0.958	1.141	18	0.269	0.606	10145	0.978	-6.644	12	-1.918	0.028	1321	0.323
CACNA1I	-0.995	15	-0.257	0.399	6538	0.994	-5.534	15	-1.429	0.077	2577	0.486	3.144	10	0.994	0.84	12120	1.072
CACNA1S	14.689	15	3.793	1	16256	1.003	-0.516	17	-0.125	0.45	8196	0.899	1.131	12	0.327	0.628	9496	1.023
CACNA2D1	3.301	18	0.778	0.782	11639	1.096	3.446	18	0.812	0.792	12541	1.033	5.601	12	1.617	0.947	13684	1.07
CACNA2D2	0.149	18	0.035	0.514	7977	1.051	6.227	18	1.468	0.929	14546	1.045	1.147	12	0.331	0.63	9519	1.023
CACNA2D3	0.971	18	0.229	0.59	8999	1.07	1.247	18	0.294	0.616	10278	0.98	-2.66	12	-0.768	0.221	4715	0.726
[truncated: 13,464 more rows]
