# Supplementary material for: CRISPR screens identify genomic ribonucleotides as a source of PARP-trapping lesions
Source: Springer Nature journal article supplement (doi:10.1038/s41586-018-0291-z), 2018-07-01
Supplement: MOESM4 [file 41586_2018_291_MOESM4_ESM%20(1).xlsx]

## Sheet: Hela
id	num	neg|score	neg|p-value	neg|fdr	neg|rank	neg|goodsgrna	pos|score	pos|p-value	pos|fdr	pos|rank	pos|goodsgrna
PARP1	6	0.98763	0.98755	0.999911	16954	0	1.9735e-16	2.872e-07	0.00495	1	5
GPR126	6	0.85783	0.88111	0.999911	14902	1	1.8504e-06	8.3288e-06	0.047855	3	5
RQCD1	6	0.92247	0.92482	0.999911	15710	1	1.2917e-06	6.0312e-06	0.047855	2	4
OR52E2	4	1	1	0.999998	17237	0	3.9553e-06	1.8668e-05	0.080446	4	4
LacZ	96	0.94482	0.94471	0.999911	16086	22	6.761e-06	3.1879e-05	0.109901	5	56
C15orf38	6	0.62275	0.7417	0.999911	12409	1	1.8485e-05	8.3576e-05	0.240099	6	5
BPIFB6	6	0.044329	0.12693	0.927575	2356	1	2.9909e-05	0.00014504	0.357143	7	5
CYB561	6	0.035756	0.1088	0.908332	2063	2	4.8967e-05	0.00022718	0.466997	8	4
GET4	6	0.84102	0.87168	0.999911	14718	1	5.2871e-05	0.00024383	0.466997	9	4
SCAF1	6	0.94421	0.94412	0.999911	16077	1	9.2593e-05	0.00041616	0.597772	12	3
DSC2	6	0.9565	0.9563	0.999911	16286	0	8.8916e-05	0.00039892	0.597772	10	4
COG6	6	0.99991	0.99991	0.999964	17236	0	9.1029e-05	0.00040926	0.597772	11	6
RYR1	6	0.9999	0.99989	0.999964	17235	0	0.00010316	0.00046728	0.619573	13	6
MFI2	6	0.51494	0.67003	0.999911	11169	2	0.00012187	0.00056665	0.651155	15	4
IGSF1	6	0.94852	0.94837	0.999911	16156	0	0.00011754	0.00054884	0.651155	14	4
MB21D2	6	0.043573	0.12535	0.927357	2328	4	0.00055835	0.0025891	0.666934	65	1
HKDC1	6	0.045607	0.1296	0.929999	2398	2	0.00055821	0.0025874	0.666934	64	4
BMP2	6	0.09879	0.23032	0.980612	4046	2	0.00055786	0.0025863	0.666934	63	3
IRX4	6	0.11517	0.25881	0.984019	4530	1	0.00053968	0.0024984	0.666934	59	3
TMEM57	6	0.12788	0.28038	0.98761	4891	2	0.00022994	0.0010962	0.666934	24	4
TMEM178B	6	0.15693	0.3279	0.999911	5601	2	0.00033071	0.0015414	0.666934	35	3
C15orf32	6	0.2274	0.40882	0.999911	6850	2	0.00052621	0.0024415	0.666934	58	4
BOD1L2	3	0.24028	0.42325	0.999911	7083	1	0.00047627	0.00221	0.666934	51	2
SRCIN1	6	0.43064	0.61466	0.999911	10213	1	0.00049267	0.002283	0.666934	52	3
B3GALT1	4	0.43419	0.61697	0.999911	10248	1	0.00026644	0.0012709	0.666934	28	3
DYNC2H1	6	0.4498	0.6272	0.999911	10416	1	0.00054324	0.0025156	0.666934	60	5
MMP1	6	0.46662	0.63822	0.999911	10609	2	0.00034176	0.0015966	0.666934	37	4
C1orf68	5	0.47079	0.64102	0.999911	10654	1	0.00016859	0.00079239	0.666934	18	4
PAPOLG	6	0.50285	0.66232	0.999911	11041	1	0.00043565	0.0020371	0.666934	49	5
PRICKLE2	6	0.54879	0.69208	0.999911	11551	2	0.00042699	0.0019952	0.666934	48	2
IGFLR1	6	0.55834	0.69836	0.999911	11650	1	0.00030217	0.0014254	0.666934	32	4
NCALD	6	0.56397	0.70206	0.999911	11711	1	0.00051454	0.0023881	0.666934	57	4
BHLHE22	5	0.56814	0.70476	0.999911	11762	2	0.00018971	0.00089923	0.666934	22	3
CCDC129	6	0.59832	0.72478	0.999911	12124	1	0.00037864	0.0017643	0.666934	45	4
MLLT10	6	0.60661	0.73056	0.999911	12216	2	0.00013739	0.00064592	0.666934	16	4
PDZD9	6	0.76221	0.83369	0.999911	14031	1	0.00036927	0.0017264	0.666934	44	5
KATNAL1	6	0.8035	0.85239	0.999911	14369	1	0.00029048	0.0013757	0.666934	31	5
MRPL52	4	0.85453	0.8792	0.999911	14864	1	0.00044757	0.0020859	0.666934	50	3
ZNF805	4	0.87724	0.89281	0.999911	15100	0	0.00015849	0.00074069	0.666934	17	3
DUSP27	6	0.88923	0.90041	0.999911	15246	1	0.00040613	0.0018941	0.666934	47	5
CCDC62	6	0.89505	0.90437	0.999911	15329	1	0.00035884	0.0016741	0.666934	42	4
TTBK2	6	0.90567	0.91178	0.999911	15482	1	0.00056578	0.0026311	0.666934	68	5
NCK1	5	0.91459	0.91845	0.999911	15592	0	0.00031075	0.0014581	0.666934	33	4
TIAM2	6	0.91476	0.91859	0.999911	15595	1	0.0002703	0.0012864	0.666934	29	5
SPAST	6	0.9302	0.93133	0.999911	15829	1	0.00031411	0.0014719	0.666934	34	5
KRT31	3	0.93361	0.9343	0.999911	15885	0	0.00055298	0.0025673	0.666934	61	2
ADAM18	6	0.93382	0.93449	0.999911	15891	1	0.00034856	0.0016287	0.666934	40	4
HTR2B	5	0.93935	0.93944	0.999911	15988	0	0.00049717	0.0023054	0.666934	54	4
RP2	6	0.97006	0.9699	0.999911	16586	0	0.00036487	0.0017051	0.666934	43	5
LMO4	5	0.97245	0.97229	0.999911	16629	0	0.00024636	0.0011767	0.666934	27	2
PYCARD	6	0.97692	0.97674	0.999911	16726	0	0.0004966	0.0023008	0.666934	53	4
MAP3K9	6	0.97843	0.9783	0.999911	16743	0	0.0001771	0.00083834	0.666934	21	4
PGLYRP1	6	0.98023	0.98014	0.999911	16783	0	0.00050597	0.0023507	0.666934	56	5
P2RX4	6	0.99015	0.99012	0.999911	17012	0	0.00016956	0.00079698	0.666934	19	5
ADAL	6	0.99146	0.99145	0.999911	17044	0	0.0003483	0.0016276	0.666934	39	5
FHL3	6	0.99162	0.99161	0.999911	17050	0	0.00017583	0.00083317	0.666934	20	5
NBEA	6	0.99692	0.99693	0.999911	17165	0	0.00024595	0.0011755	0.666934	26	5
SH2B1	6	0.99943	0.99942	0.999964	17224	0	0.00056523	0.002627	0.666934	67	6
WFDC1	6	0.99944	0.99943	0.999964	17226	0	0.00055587	0.0025771	0.666934	62	6
CARD18	1	0.99944	0.99942	0.999964	17225	0	0.00056395	0.0026201	0.666934	66	1
PFKFB1	6	0.99949	0.99948	0.999964	17227	0	0.00050541	0.0023479	0.666934	55	6
ARSF	6	0.99961	0.99959	0.999964	17228	0	0.00038545	0.0017947	0.666934	46	6
TRMT2B	6	0.99964	0.99962	0.999964	17229	0	0.00035831	0.0016689	0.666934	41	6
ADAM28	6	0.99966	0.99963	0.999964	17230	0	0.00034475	0.0016109	0.666934	38	6
PRSS27	6	0.99966	0.99964	0.999964	17231	0	0.00034003	0.0015891	0.666934	36	6
ZCCHC5	5	0.99973	0.99971	0.999964	17232	0	0.00027374	0.0013025	0.666934	30	5
TM9SF3	6	0.99976	0.99975	0.999964	17233	0	0.00024245	0.0011606	0.666934	25	6
ASB9	5	0.99981	0.9998	0.999964	17234	0	0.00018973	0.00089923	0.666934	23	5
ACOT9	6	0.08629	0.20816	0.97582	3676	3	0.0005962	0.0027672	0.674592	70	3
PSD3	6	0.73909	0.82225	0.999911	13822	1	0.00059871	0.0027787	0.674592	71	5
TKTL2	6	0.94301	0.94296	0.999911	16051	1	0.00059202	0.0027448	0.674592	69	5
COLEC12	6	0.020172	0.0665	0.872339	1311	3	0.00062402	0.0028826	0.680659	73	2
C11orf80	6	0.46928	0.63998	0.999911	10630	1	0.00061913	0.0028666	0.680659	72	5
LRP11	6	0.30676	0.49456	0.999911	8221	1	0.00065001	0.003005	0.69996	74	5
HIAT1	6	0.44441	0.62366	0.999911	10368	1	0.00067366	0.0031141	0.702006	76	5
PPFIA2	6	0.69306	0.78928	0.999911	13254	1	0.00067791	0.003136	0.702006	77	4
IGF1R	6	0.99933	0.99932	0.999964	17223	0	0.00067233	0.0031084	0.702006	75	6
CBFA2T3	6	0.93546	0.93597	0.999911	15922	1	0.00068968	0.0031922	0.705446	78	3
SLC25A42	6	0.27444	0.46051	0.999911	7683	2	0.00075535	0.0034588	0.719492	82	3
APBB1IP	6	0.55995	0.69943	0.999911	11666	2	0.00072731	0.0033399	0.719492	79	4
MOG	6	0.989	0.98895	0.999911	16984	0	0.00075664	0.0034645	0.719492	83	5
MAP1A	6	0.99925	0.99925	0.999964	17222	0	0.00074536	0.0034186	0.719492	80	6
SIRPB1	5	0.99925	0.99925	0.999964	17221	0	0.00075477	0.003457	0.719492	81	5
GPR6	5	0.76347	0.83423	0.999911	14040	1	0.00079976	0.0036386	0.740885	84	4
ZP4	6	0.83406	0.86793	0.999911	14637	1	0.00080457	0.0036535	0.740885	85	5
RASGRP3	6	0.25589	0.44041	0.999911	7346	1	0.0008244	0.0037397	0.740924	87	5
SERPINB5	6	0.71911	0.80778	0.999911	13573	2	0.00082101	0.0037207	0.740924	86	4
LIN7C	5	0.09082	0.21624	0.976168	3807	3	0.00084838	0.0038436	0.74441	89	1
ZNF843	6	0.99447	0.99446	0.999911	17117	0	0.00084051	0.0038086	0.74441	88	5
TRAF7	6	0.10048	0.23325	0.981601	4094	2	0.00089523	0.0040498	0.767109	91	4
ARHGEF3	6	0.75265	0.82974	0.999911	13969	1	0.00088666	0.0040079	0.767109	90	4
PTGES2	6	0.0054736	0.021669	0.742857	494	3	0.0033134	0.01405	0.81379	295	2
NFATC2	6	0.0084416	0.031264	0.781941	689	4	0.0044268	0.017837	0.81379	367	2
C9orf117	6	0.012321	0.043208	0.82205	906	1	0.0025925	0.011253	0.81379	234	3
PANK1	6	0.016186	0.054878	0.849476	1112	5	0.0023302	0.010197	0.81379	208	1
LRP4	6	0.025706	0.08196	0.874455	1609	1	0.0043812	0.017688	0.81379	365	5
SMPD2	6	0.028657	0.090099	0.888567	1746	2	0.0032412	0.013808	0.81379	289	4
ZNF398	6	0.04041	0.11875	0.922459	2219	2	0.0034445	0.014505	0.81379	304	4
NRN1	6	0.043344	0.1249	0.927357	2317	3	0.0046231	0.018514	0.81379	387	2
RGS2	4	0.04906	0.1367	0.933209	2524	2	0.0019478	0.0086169	0.81379	168	2
RPS6KA2	6	0.054605	0.14795	0.935506	2723	3	0.0030386	0.013109	0.81379	272	3
PIEZO2	6	0.055001	0.14878	0.935622	2740	3	0.0022356	0.0098306	0.81379	199	3
GPR61	6	0.057976	0.15477	0.94754	2815	1	0.003747	0.015529	0.81379	323	5
KLK10	6	0.072087	0.18214	0.96654	3237	3	0.0021334	0.0093832	0.81379	187	3
HEXDC	6	0.073743	0.18527	0.96654	3295	2	0.0018331	0.0081126	0.81379	161	4
TAS1R3	6	0.076637	0.19071	0.96654	3385	3	0.001071	0.0048264	0.81379	96	3
NCAM1	6	0.083134	0.20241	0.97112	3592	2	0.0033956	0.014335	0.81379	300	3
HOXB13	6	0.086673	0.20888	0.97582	3685	1	0.0013462	0.0060068	0.81379	121	3
TXNDC15	6	0.097524	0.22809	0.978937	4016	1	0.0014777	0.006572	0.81379	128	4
SMARCAD1	6	0.10964	0.24926	0.982777	4367	1	0.0046708	0.018657	0.81379	391	5
PTGIR	6	0.12091	0.26865	0.984268	4702	1	0.0023707	0.010373	0.81379	213	5
AGO1	6	0.12277	0.27177	0.986094	4750	3	0.0045902	0.018413	0.81379	385	3
ZCCHC24	6	0.13358	0.28987	0.990628	5035	1	0.0032132	0.0137	0.81379	285	4
SH3RF3	6	0.13658	0.29484	0.992078	5116	2	0.0027201	0.011785	0.81379	242	2
KLC1	6	0.13719	0.29583	0.992347	5134	1	0.0018055	0.0079833	0.81379	156	4
GPR75	5	0.13985	0.30034	0.992485	5208	2	0.0036273	0.015134	0.81379	317	3
TCF19	6	0.14893	0.31528	0.999911	5411	3	0.0040339	0.016503	0.81379	344	2
OR2Z1	6	0.16677	0.34073	0.999911	5788	2	0.0012805	0.0057288	0.81379	117	4
IL1R2	6	0.16851	0.34271	0.999911	5814	3	0.003903	0.016049	0.81379	335	2
DDX17	6	0.17422	0.34919	0.999911	5912	1	0.0028109	0.012133	0.81379	253	5
TSPAN18	6	0.1778	0.35327	0.999911	5974	2	0.0041009	0.016738	0.81379	348	3
FOXJ1	6	0.18912	0.36602	0.999911	6173	2	0.0024613	0.010732	0.81379	222	2
RPGRIP1	6	0.20077	0.37909	0.999911	6399	2	0.0022305	0.0098036	0.81379	198	4
HDHD2	5	0.20296	0.3816	0.999911	6441	2	0.003349	0.014181	0.81379	298	3
PRR26	6	0.2098	0.38927	0.999911	6557	2	0.0044989	0.018093	0.81379	376	2
C1orf106	6	0.21168	0.39136	0.999911	6590	2	0.001474	0.006556	0.81379	126	3
SPRYD7	5	0.22374	0.40474	0.999911	6783	2	0.0021062	0.0092844	0.81379	183	2
ARID5B	6	0.22651	0.40782	0.999911	6833	3	0.0038756	0.015955	0.81379	332	3
FZD3	6	0.23575	0.41818	0.999911	6995	3	0.0031305	0.013418	0.81379	281	3
IL12RB2	6	0.23988	0.42279	0.999911	7078	2	0.0020681	0.0091293	0.81379	180	4
LTBP1	6	0.24262	0.42587	0.999911	7122	2	0.0014543	0.0064686	0.81379	125	4
PRSS55	6	0.24302	0.42632	0.999911	7131	3	0.0035093	0.014733	0.81379	307	3
FAM129B	6	0.2444	0.42782	0.999911	7153	3	0.0030513	0.013145	0.81379	275	2
CDH11	6	0.24657	0.43018	0.999911	7190	2	0.0036269	0.015132	0.81379	316	3
LPAR1	6	0.25337	0.43771	0.999911	7298	1	0.0030197	0.013043	0.81379	270	3
GPR176	6	0.26448	0.44977	0.999911	7506	2	0.0016383	0.0072711	0.81379	140	3
C16orf58	6	0.27056	0.45633	0.999911	7624	1	0.0021747	0.0095635	0.81379	192	5
PORCN	6	0.28571	0.47267	0.999911	7878	2	0.0027891	0.01205	0.81379	246	3
PPP1CA	6	0.30269	0.49045	0.999911	8147	1	0.0010836	0.0048741	0.81379	99	4
THUMPD2	6	0.30405	0.49183	0.999911	8171	3	0.004358	0.017608	0.81379	361	3
SLC6A15	6	0.30986	0.49772	0.999911	8273	1	0.0041889	0.017035	0.81379	354	5
WDR4	6	0.3127	0.50062	0.999911	8314	1	0.0046886	0.018707	0.81379	394	4
GLRA2	6	0.31385	0.50184	0.999911	8330	2	0.0035528	0.014901	0.81379	310	4
SSBP3	6	0.31416	0.50217	0.999911	8336	1	0.0035869	0.015011	0.81379	313	3
ADCY9	6	0.31457	0.50258	0.999911	8341	1	0.0027914	0.012061	0.81379	247	4
C6orf99	6	0.32709	0.5152	0.999911	8575	2	0.0022047	0.0097071	0.81379	195	4
TK2	6	0.32942	0.51759	0.999911	8618	2	0.0046135	0.01848	0.81379	386	3
GPR26	6	0.33787	0.52607	0.999911	8753	2	0.0029108	0.012575	0.81379	263	4
TEDDM1	4	0.35303	0.54082	0.999911	9000	1	0.002796	0.012078	0.81379	249	2
MAP2K4	5	0.36089	0.54854	0.999911	9111	2	0.0035811	0.014994	0.81379	312	2
OSR2	6	0.36406	0.55158	0.999911	9164	1	0.0028197	0.012178	0.81379	254	5
CACNA2D4	6	0.3716	0.55888	0.999911	9286	2	0.0032479	0.013835	0.81379	290	3
PLBD2	6	0.37238	0.55964	0.999911	9303	1	0.0047662	0.018979	0.81379	402	4
RER1	6	0.37267	0.55993	0.999911	9312	3	0.0018711	0.008282	0.81379	163	2
ABCA2	6	0.37611	0.56325	0.999911	9357	2	0.0043236	0.0175	0.81379	359	3
METTL25	6	0.37817	0.56522	0.999911	9389	1	0.0027974	0.012085	0.81379	250	3
KLF10	6	0.3822	0.56914	0.999911	9451	2	0.0017171	0.0076152	0.81379	149	4
SETX	6	0.38852	0.57533	0.999911	9536	3	0.0039517	0.016228	0.81379	340	3
NYX	5	0.38949	0.5762	0.999911	9552	1	0.0021468	0.0094418	0.81379	188	4
ZNF704	6	0.39052	0.57719	0.999911	9569	1	0.0043684	0.017648	0.81379	364	5
PXDNL	6	0.39567	0.58227	0.999911	9644	1	0.0013581	0.0060706	0.81379	122	5
CTTNBP2NL	4	0.40126	0.58762	0.999911	9743	1	0.0011726	0.0052595	0.81379	104	3
RIMBP2	6	0.40234	0.58864	0.999911	9763	1	0.0021034	0.0092723	0.81379	182	4
NMUR1	6	0.40993	0.59599	0.999911	9899	1	0.0014774	0.0065709	0.81379	127	4
ANKEF1	6	0.4138	0.59971	0.999911	9967	1	0.0045017	0.018103	0.81379	377	5
ARHGAP33	6	0.42148	0.60704	0.999911	10085	2	0.0038252	0.015787	0.81379	329	4
IMPDH2	6	0.42256	0.60807	0.999911	10104	1	0.0021596	0.0095026	0.81379	190	5
COMMD7	6	0.42321	0.6087	0.999911	10121	2	0.00351	0.014735	0.81379	308	2
FXR1	5	0.42387	0.60931	0.999911	10128	2	0.0022273	0.0097939	0.81379	197	3
SLC14A2	6	0.42531	0.6107	0.999911	10151	3	0.0038002	0.015703	0.81379	327	3
chr10Rand	584	0.45794	0.63256	0.999911	10504	215	0.0027377	0.011854	0.81379	243	243
CD1D	6	0.45951	0.63357	0.999911	10517	2	0.0034254	0.01445	0.81379	302	4
RNF144A	6	0.4899	0.65367	0.999911	10896	1	0.0037065	0.0154	0.81379	319	4
CHRNG	6	0.4929	0.65571	0.999911	10933	2	0.0047406	0.018886	0.81379	399	2
IL17RE	6	0.50035	0.66072	0.999911	11010	2	0.0045305	0.018203	0.81379	380	4
STOML1	6	0.50357	0.66276	0.999911	11047	2	0.0031442	0.013468	0.81379	282	4
VRK2	6	0.51275	0.66861	0.999911	11143	1	0.0023003	0.010079	0.81379	205	3
SLK	6	0.51278	0.66863	0.999911	11144	2	0.0033064	0.014025	0.81379	293	4
PIN4	3	0.51358	0.66912	0.999911	11152	1	0.0037311	0.015481	0.81379	321	2
GUCY1A3	6	0.52474	0.67632	0.999911	11287	2	0.0039009	0.016041	0.81379	334	4
TLE4	6	0.52483	0.67637	0.999911	11288	2	0.0041514	0.016893	0.81379	351	4
CCNI	6	0.52718	0.67789	0.999911	11313	2	0.0032276	0.013756	0.81379	286	4
TMCO5A	6	0.52804	0.67844	0.999911	11316	2	0.0020246	0.0089311	0.81379	175	4
TANC2	6	0.53282	0.68155	0.999911	11371	2	0.0031809	0.013596	0.81379	283	4
SERINC1	6	0.54444	0.68916	0.999911	11501	2	0.0012191	0.0054623	0.81379	109	4
PDE7B	6	0.55113	0.69358	0.999911	11573	2	0.0041217	0.016804	0.81379	350	4
PDE8A	6	0.55563	0.69654	0.999911	11618	1	0.0046741	0.018667	0.81379	392	3
SLC38A5	6	0.56054	0.69982	0.999911	11671	2	0.0039364	0.016175	0.81379	338	3
PSKH2	6	0.56233	0.70098	0.999911	11688	1	0.0023046	0.010093	0.81379	206	5
CCDC154	6	0.57518	0.70943	0.999911	11847	2	0.0037106	0.015411	0.81379	320	3
ORAI3	6	0.57615	0.71009	0.999911	11858	2	0.0047024	0.018767	0.81379	396	4
THEMIS	5	0.57862	0.71167	0.999911	11899	1	0.0044548	0.017939	0.81379	370	4
CDCP2	6	0.5801	0.71267	0.999911	11913	1	0.0024094	0.010527	0.81379	216	3
KCNK5	6	0.58435	0.71547	0.999911	11973	2	0.0032569	0.013868	0.81379	291	3
PSMB8	6	0.5937	0.72167	0.999911	12072	2	0.0022628	0.0099271	0.81379	200	4
TF	6	0.59694	0.72381	0.999911	12106	1	0.0015477	0.0068851	0.81379	134	5
PRUNE	6	0.59994	0.72594	0.999911	12143	2	0.0038052	0.015722	0.81379	328	4
ZNF41	3	0.59994	0.72594	0.999911	12141	1	0.0020518	0.0090575	0.81379	178	2
GRAP2	6	0.60449	0.72909	0.999911	12194	1	0.0025713	0.011176	0.81379	232	5
TIMM17B	2	0.6137	0.73543	0.999911	12304	1	0.0031185	0.013382	0.81379	280	1
SLC25A43	6	0.61421	0.73579	0.999911	12309	1	0.0025617	0.011141	0.81379	231	4
SERAC1	5	0.6234	0.74213	0.999911	12426	1	0.0040102	0.016427	0.81379	343	4
PARD3B	6	0.63287	0.74871	0.999911	12562	2	0.0028669	0.012379	0.81379	258	3
GABARAPL2	6	0.63539	0.75048	0.999911	12587	2	0.0023958	0.010476	0.81379	214	3
FARP1	6	0.63599	0.75089	0.999911	12595	1	0.0017399	0.0077036	0.81379	150	3
PTPRG	6	0.63949	0.75326	0.999911	12636	1	0.0046785	0.018678	0.81379	393	4
F10	6	0.64219	0.75501	0.999911	12676	1	0.003456	0.014547	0.81379	305	5
DDX19B	5	0.64263	0.75528	0.999911	12680	1	0.0014949	0.0066559	0.81379	131	4
MORF4L1	4	0.64931	0.75979	0.999911	12742	1	0.0028222	0.012189	0.81379	255	2
MPZL3	5	0.65049	0.76057	0.999911	12759	1	0.0044366	0.017875	0.81379	369	4
AHCYL1	6	0.66209	0.76837	0.999911	12889	1	0.0047176	0.018811	0.81379	397	5
TPPP2	6	0.66424	0.76983	0.999911	12917	2	0.0019085	0.00844	0.81379	166	4
TEPP	6	0.67329	0.77589	0.999911	13021	2	0.0021512	0.0094636	0.81379	189	3
HAO2	6	0.67693	0.77835	0.999911	13076	2	0.0025914	0.011249	0.81379	233	3
SPARCL1	6	0.70458	0.79741	0.999911	13410	2	0.0031168	0.013374	0.81379	279	3
FGG	5	0.70805	0.7998	0.999911	13454	1	0.0040567	0.016581	0.81379	345	4
CADPS2	6	0.71538	0.80512	0.999911	13530	1	0.003765	0.015588	0.81379	325	5
MDH1B	6	0.72701	0.81347	0.999911	13670	1	0.0038375	0.015824	0.81379	330	4
SPAG7	6	0.72792	0.81416	0.999911	13679	1	0.0024214	0.010566	0.81379	219	5
CBX8	6	0.72878	0.81478	0.999911	13694	1	0.0016865	0.0074865	0.81379	145	5
KRIT1	6	0.73501	0.8193	0.999911	13767	1	0.0045385	0.01823	0.81379	381	5
BGN	6	0.73565	0.81973	0.999911	13776	2	0.0024174	0.010553	0.81379	217	3
LIX1	6	0.73953	0.82257	0.999911	13828	2	0.0041042	0.016751	0.81379	349	3
FAM9A	4	0.74352	0.82553	0.999911	13894	1	0.0036088	0.015071	0.81379	314	2
CARS	6	0.74541	0.82669	0.999911	13916	1	0.0018785	0.0083073	0.81379	164	5
RUSC2	6	0.74947	0.82838	0.999911	13950	1	0.0028804	0.012438	0.81379	260	5
COMMD2	4	0.76784	0.83613	0.999911	14070	1	0.0010727	0.0048333	0.81379	97	3
DHDH	6	0.77184	0.83786	0.999911	14100	1	0.00164	0.0072786	0.81379	141	5
ALAS2	6	0.78245	0.84253	0.999911	14182	1	0.0045484	0.01826	0.81379	382	5
ABCC10	6	0.78738	0.84477	0.999911	14232	1	0.0026148	0.01133	0.81379	235	5
CXCR7	3	0.79291	0.84734	0.999911	14280	0	0.0045734	0.018344	0.81379	383	2
HN1	4	0.79294	0.84735	0.999911	14281	1	0.0027785	0.012006	0.81379	245	3
CAPN6	6	0.79474	0.84823	0.999911	14296	1	0.0016939	0.00751	0.81379	147	4
LDLRAD2	6	0.79739	0.84945	0.999911	14316	1	0.0019793	0.0087421	0.81379	171	4
SCHIP1	6	0.80938	0.85526	0.999911	14414	1	0.0030669	0.013206	0.81379	277	4
FPR3	4	0.81282	0.85695	0.999911	14443	1	0.0046293	0.018533	0.81379	388	3
OR13H1	4	0.81906	0.86016	0.999911	14496	1	0.0025162	0.01095	0.81379	225	3
TRAPPC12	6	0.82508	0.86322	0.999911	14549	1	0.0022899	0.010037	0.81379	203	5
ITPRIPL2	5	0.82646	0.86398	0.999911	14564	1	0.004244	0.01722	0.81379	357	4
ZNF683	6	0.83242	0.86704	0.999911	14618	1	0.0020679	0.0091287	0.81379	179	3
HARS	6	0.83546	0.86869	0.999911	14658	1	0.002658	0.011511	0.81379	239	1
FUS	6	0.8368	0.8694	0.999911	14668	1	0.0036119	0.015078	0.81379	315	5
WASL	6	0.8425	0.87246	0.999911	14735	1	0.001978	0.0087387	0.81379	170	5
NHLRC1	5	0.84294	0.87273	0.999911	14742	1	0.0042409	0.017209	0.81379	356	3
GBP6	5	0.84374	0.87317	0.999911	14752	1	0.004507	0.018121	0.81379	378	4
LCP1	6	0.8469	0.87492	0.999911	14787	1	0.0044684	0.017991	0.81379	372	5
KLF13	6	0.84772	0.87536	0.999911	14792	1	0.0021142	0.0093137	0.81379	185	4
YIPF7	6	0.84797	0.87549	0.999911	14796	1	0.0039045	0.016057	0.81379	336	5
KNTC1	6	0.84889	0.87601	0.999911	14809	1	0.0020124	0.0088783	0.81379	174	5
CLCA1	6	0.85061	0.87697	0.999911	14825	1	0.0035238	0.014789	0.81379	309	4
NDNF	6	0.85419	0.87901	0.999911	14859	1	0.0012149	0.0054462	0.81379	108	4
C10orf118	6	0.85955	0.88211	0.999911	14917	1	0.0042596	0.017274	0.81379	358	5
WDR59	6	0.86279	0.88396	0.999911	14945	1	0.003097	0.013299	0.81379	278	5
OR5R1	3	0.86344	0.88435	0.999911	14953	0	0.0025438	0.011062	0.81379	229	1
CPNE7	6	0.86391	0.88465	0.999911	14956	1	0.0041729	0.016984	0.81379	352	5
CLVS1	6	0.86992	0.88829	0.999911	15018	1	0.0016053	0.0071229	0.81379	136	5
FAS	2	0.88148	0.89539	0.999911	15154	0	0.00443	0.017851	0.81379	368	2
LEPRE1	6	0.88159	0.89547	0.999911	15158	1	0.0047183	0.018813	0.81379	398	4
DUS2L	6	0.88389	0.8969	0.999911	15185	1	0.0037499	0.01554	0.81379	324	5
SYVN1	6	0.88565	0.89803	0.999911	15205	1	0.0028727	0.012398	0.81379	259	5
EHD3	6	0.89326	0.90314	0.999911	15292	1	0.0015553	0.0069282	0.81379	135	5
TRPA1	5	0.8957	0.90483	0.999911	15340	1	0.0023668	0.010356	0.81379	211	3
CDKL4	4	0.89747	0.90603	0.999911	15366	0	0.0019569	0.0086502	0.81379	169	3
OR13C8	4	0.90205	0.9092	0.999911	15424	0	0.0046616	0.018628	0.81379	390	3
APLP2	6	0.90319	0.91002	0.999911	15438	1	0.0038705	0.01594	0.81379	331	4
EEF2K	6	0.90667	0.91249	0.999911	15494	1	0.0020351	0.0089822	0.81379	177	5
FAM151A	5	0.90699	0.91272	0.999911	15499	1	0.0024637	0.010741	0.81379	223	4
BCL2L14	6	0.90785	0.91334	0.999911	15507	1	0.0037702	0.015603	0.81379	326	4
FAM179B	6	0.90967	0.91471	0.999911	15526	1	0.0014809	0.0065898	0.81379	129	5
C1orf210	4	0.91136	0.91601	0.999911	15548	0	0.0033091	0.014036	0.81379	294	3
OFD1	6	0.91257	0.91688	0.999911	15567	1	0.0010775	0.0048494	0.81379	98	5
MOGAT2	6	0.9202	0.92297	0.999911	15679	1	0.0014118	0.0062854	0.81379	124	2
GBP5	6	0.9202	0.92297	0.999911	15678	1	0.002946	0.012734	0.81379	264	4
MCTP1	6	0.92681	0.92846	0.999911	15770	1	0.0023684	0.010364	0.81379	212	4
PICALM	6	0.9283	0.92969	0.999911	15796	1	0.004754	0.018934	0.81379	400	4
MAP9	5	0.92967	0.93086	0.999911	15816	0	0.0039674	0.016278	0.81379	341	4
ERCC6L2	6	0.93285	0.93363	0.999911	15871	1	0.0023654	0.01035	0.81379	210	3
EXPH5	6	0.93407	0.93469	0.999911	15897	1	0.0034346	0.014479	0.81379	303	5
RNF122	6	0.93411	0.93473	0.999911	15898	1	0.0035755	0.014977	0.81379	311	3
EP400	6	0.93579	0.93624	0.999911	15929	1	0.0043406	0.017557	0.81379	360	4
MYH15	6	0.93989	0.93995	0.999911	15995	1	0.0016935	0.0075083	0.81379	146	5
EPHA6	6	0.9401	0.94014	0.999911	15999	1	0.0024074	0.010519	0.81379	215	4
IL20	3	0.94307	0.94302	0.999911	16053	0	0.0011329	0.0050993	0.81379	100	2
GLYCTK	6	0.9431	0.94304	0.999911	16055	1	0.0018631	0.0082487	0.81379	162	4
MYLK4	6	0.9441	0.94399	0.999911	16073	1	0.0024222	0.010568	0.81379	220	4
MAP7D3	6	0.94543	0.9453	0.999911	16103	1	0.0028547	0.012329	0.81379	257	4
GABRQ	6	0.95178	0.95165	0.999911	16212	0	0.0030444	0.013127	0.81379	274	5
TBL1Y	5	0.95209	0.95194	0.999911	16221	0	0.0029039	0.012542	0.81379	261	3
SUCNR1	4	0.95286	0.95269	0.999911	16233	0	0.0032078	0.01368	0.81379	284	3
CD163L1	6	0.95374	0.95358	0.999911	16248	0	0.0032408	0.013805	0.81379	288	4
GAP43	4	0.95606	0.95586	0.999911	16281	0	0.0030434	0.013123	0.81379	273	3
SH2D2A	6	0.95941	0.95919	0.999911	16351	0	0.003361	0.014219	0.81379	299	4
NBR1	6	0.95984	0.95961	0.999911	16364	0	0.0039083	0.016068	0.81379	337	5
PLA2G4C	6	0.96059	0.96036	0.999911	16375	0	0.0044736	0.01801	0.81379	374	5
MAP7	6	0.96121	0.96098	0.999911	16383	0	0.0043613	0.017614	0.81379	362	3
C2orf48	6	0.96289	0.96265	0.999911	16424	0	0.0033202	0.014074	0.81379	296	5
RSPRY1	6	0.96565	0.96547	0.999911	16495	0	0.0044628	0.01797	0.81379	371	5
WIPF2	6	0.96756	0.96739	0.999911	16534	0	0.00099492	0.0044967	0.81379	93	5
FAAH	6	0.96993	0.96977	0.999911	16582	0	0.0016725	0.0074319	0.81379	143	5
HIST1H4G	5	0.97159	0.97146	0.999911	16615	0	0.0016688	0.0074193	0.81379	142	3
SLC5A7	6	0.97264	0.97249	0.999911	16635	0	0.0026216	0.011355	0.81379	236	5
KERA	6	0.97413	0.97398	0.999911	16675	0	0.001043	0.0047075	0.81379	95	5
DNAJC30	5	0.97482	0.97465	0.999911	16689	0	0.0018329	0.0081114	0.81379	160	4
COLEC11	6	0.97692	0.97674	0.999911	16720	0	0.0044699	0.017996	0.81379	373	3
LRRC28	6	0.97911	0.979	0.999911	16754	0	0.0021069	0.0092861	0.81379	184	5
PRR14	6	0.98089	0.98082	0.999911	16793	0	0.0013245	0.0059161	0.81379	118	5
DOK4	6	0.98095	0.98088	0.999911	16795	0	0.0012552	0.0056208	0.81379	116	5
CYP3A5	2	0.98132	0.98124	0.999911	16799	0	0.0029873	0.012921	0.81379	268	2
NRK	6	0.98155	0.98145	0.999911	16804	0	0.0010288	0.0046357	0.81379	94	4
PPP3R1	6	0.98227	0.98216	0.999911	16819	0	0.0032667	0.013902	0.81379	292	5
ADK	6	0.98247	0.98235	0.999911	16824	0	0.001625	0.0072154	0.81379	137	5
CACNA1G	6	0.98428	0.98419	0.999911	16875	0	0.0040905	0.0167	0.81379	347	4
RILPL1	6	0.98477	0.98468	0.999911	16887	0	0.0039685	0.016283	0.81379	342	4
ADCK1	6	0.98481	0.98472	0.999911	16888	0	0.002806	0.012113	0.81379	252	4
ASGR2	5	0.98631	0.98624	0.999911	16928	0	0.002773	0.011986	0.81379	244	4
FAIM2	6	0.98753	0.98746	0.999911	16953	0	0.0012412	0.0055645	0.81379	113	5
ATP2B1	6	0.98804	0.98798	0.999911	16963	0	0.0043922	0.017724	0.81379	366	5
C2orf68	6	0.98804	0.98798	0.999911	16962	0	0.0016358	0.0072584	0.81379	139	5
NFX1	6	0.98829	0.98823	0.999911	16971	0	0.0029858	0.012916	0.81379	267	3
SERPINB2	6	0.98932	0.98928	0.999911	16991	0	0.0033282	0.014108	0.81379	297	4
DUSP6	6	0.98933	0.98929	0.999911	16992	0	0.002483	0.010824	0.81379	224	4
CLEC2D	3	0.9902	0.99017	0.999911	17013	0	0.0045248	0.018184	0.81379	379	3
RPGRIP1L	6	0.99031	0.99029	0.999911	17019	0	0.0022923	0.010047	0.81379	204	5
KIAA1551	5	0.99043	0.99041	0.999911	17023	0	0.0019988	0.0088225	0.81379	172	4
H2AFY2	6	0.99044	0.99043	0.999911	17024	0	0.0036619	0.015254	0.81379	318	5
GDPD2	6	0.99082	0.99082	0.999911	17030	0	0.0040732	0.016637	0.81379	346	5
FOXP3	6	0.99141	0.99141	0.999911	17043	0	0.0037397	0.015504	0.81379	322	5
FUT8	6	0.99154	0.99152	0.999911	17048	0	0.0047628	0.018967	0.81379	401	3
ATRX	6	0.99256	0.99253	0.999911	17072	0	0.0018044	0.0079787	0.81379	155	5
PLA2G2F	6	0.99287	0.99283	0.999911	17079	0	0.002978	0.012882	0.81379	266	5
GPC3	6	0.99402	0.99402	0.999911	17103	0	0.0042205	0.01714	0.81379	355	5
CDCA2	6	0.99434	0.99435	0.999911	17111	0	0.0041826	0.017022	0.81379	353	5
SYT1	6	0.99444	0.99443	0.999911	17116	0	0.004643	0.018575	0.81379	389	5
KBTBD3	5	0.99451	0.99451	0.999911	17119	0	0.0018846	0.0083297	0.81379	165	5
SMG9	6	0.99457	0.99457	0.999911	17120	0	0.0016743	0.00744	0.81379	144	4
GFRAL	6	0.99477	0.99477	0.999911	17127	0	0.0017026	0.0075508	0.81379	148	4
CCDC113	6	0.99503	0.99505	0.999911	17129	0	0.0044922	0.018074	0.81379	375	5
NME1	4	0.9955	0.99552	0.999911	17140	0	0.0030279	0.013068	0.81379	271	4
OR2T10	2	0.99564	0.99565	0.999911	17142	0	0.0043623	0.017616	0.81379	363	2
HDAC9	6	0.99595	0.99596	0.999911	17147	0	0.0030624	0.013189	0.81379	276	5
PUS7L	3	0.99605	0.99605	0.999911	17148	0	0.0039512	0.016228	0.81379	339	3
MTERFD3	1	0.99612	0.99613	0.999911	17150	0	0.003882	0.015979	0.81379	333	1
METTL23	2	0.99637	0.99639	0.999911	17156	0	0.0017404	0.0077065	0.81379	151	2
LUC7L	6	0.99652	0.99655	0.999911	17158	0	0.0046904	0.018714	0.81379	395	5
CLEC3A	5	0.99653	0.99656	0.999911	17159	0	0.0034678	0.014582	0.81379	306	5
GSTA4	5	0.99659	0.99662	0.999911	17160	0	0.0034057	0.014378	0.81379	301	5
COBLL1	6	0.99675	0.99677	0.999911	17162	0	0.0045769	0.018356	0.81379	384	5
OR8A1	4	0.99677	0.99679	0.999911	17163	0	0.0032277	0.013756	0.81379	287	4
APAF1	6	0.99697	0.99698	0.999911	17167	0	0.0029907	0.012937	0.81379	269	5
SLCO1B7	1	0.99704	0.99704	0.999911	17168	0	0.0029621	0.012819	0.81379	265	1
C1S	6	0.99709	0.9971	0.999911	17169	0	0.0029083	0.012564	0.81379	262	6
CEP76	6	0.99717	0.99718	0.999911	17170	0	0.0028288	0.012224	0.81379	256	6
TXNDC11	6	0.9972	0.99721	0.999911	17172	0	0.0027958	0.012078	0.81379	248	6
GALNT13	5	0.9972	0.99721	0.999911	17171	0	0.0028002	0.012093	0.81379	251	5
NCSTN	6	0.99724	0.99725	0.999911	17173	0	0.0025192	0.010963	0.81379	226	6
ENPP3	6	0.99732	0.99734	0.999911	17174	0	0.0026832	0.011626	0.81379	241	6
MTMR6	6	0.99734	0.99736	0.999911	17175	0	0.0026634	0.011537	0.81379	240	6
C20orf194	6	0.99735	0.99738	0.999911	17176	0	0.0026454	0.01146	0.81379	238	6
DPCD	6	0.99736	0.99738	0.999911	17177	0	0.0026353	0.011412	0.81379	237	6
BDKRB2	5	0.99745	0.99747	0.999911	17178	0	0.0025468	0.011073	0.81379	230	5
PAQR9	5	0.99747	0.9975	0.999911	17180	0	0.0025253	0.01099	0.81379	227	5
RP1	6	0.99747	0.99748	0.999911	17179	0	0.0025349	0.011028	0.81379	228	6
SERPINA9	6	0.99754	0.99756	0.999911	17181	0	0.0013697	0.0061148	0.81379	123	6
FYN	6	0.99755	0.99757	0.999911	17182	0	0.00245	0.010695	0.81379	221	6
NRAS	2	0.99758	0.99761	0.999911	17183	0	0.0024191	0.010558	0.81379	218	2
BCL11B	6	0.99765	0.99768	0.999911	17184	0	0.0023466	0.010267	0.81379	209	6
ZNF711	6	0.99768	0.99771	0.999911	17185	0	0.0023176	0.010148	0.81379	207	6
ARMC3	6	0.99773	0.99775	0.999911	17186	0	0.0022728	0.0099742	0.81379	202	6
ZNF764	5	0.99773	0.99775	0.999911	17187	0	0.0022676	0.0099484	0.81379	201	5
MAGEC1	5	0.99777	0.99779	0.999911	17188	0	0.0022271	0.0097933	0.81379	196	5
PHKG2	6	0.9978	0.99782	0.999911	17190	0	0.0021952	0.0096658	0.81379	193	6
COPS8	1	0.9978	0.99782	0.999911	17189	0	0.0021956	0.0096675	0.81379	194	1
CREB5	6	0.99783	0.99785	0.999911	17191	0	0.0021674	0.0095296	0.81379	191	6
PPM1D	6	0.99788	0.9979	0.999911	17193	0	0.0011692	0.0052475	0.81379	103	6
OR52N5	3	0.99788	0.99789	0.999911	17192	0	0.0021228	0.0093395	0.81379	186	3
SDS	6	0.99792	0.99796	0.999911	17194	0	0.0020764	0.0091626	0.81379	181	6
FMO4	6	0.99793	0.99796	0.999911	17195	0	0.0020268	0.0089409	0.81379	176	6
GPHN	6	0.998	0.99803	0.999911	17196	0	0.0020012	0.0088289	0.81379	173	6
ESR2	6	0.99809	0.99812	0.999911	17197	0	0.0019089	0.0084434	0.81379	167	6
ACOT13	5	0.99818	0.99821	0.999911	17198	0	0.0018152	0.0080184	0.81379	159	5
HSPB7	6	0.99819	0.99821	0.999911	17200	0	0.0018083	0.0079931	0.81379	157	6
NPHS1	6	0.99819	0.99821	0.999911	17199	0	0.00181	0.0079989	0.81379	158	6
GJB1	4	0.99821	0.99823	0.999911	17201	0	0.0017892	0.007911	0.81379	154	4
CLTA	6	0.99825	0.99826	0.999911	17202	0	0.001752	0.0077542	0.81379	153	6
KIAA0196	6	0.99826	0.99827	0.999911	17203	0	0.0017419	0.0077117	0.81379	152	6
LOH12CR1	6	0.99837	0.99839	0.999911	17204	0	0.0016346	0.0072544	0.81379	138	6
OR10H4	1	0.99847	0.99849	0.999911	17205	0	0.0015276	0.0068024	0.81379	133	1
BMP15	6	0.99848	0.99849	0.999911	17206	0	0.0015233	0.0067794	0.81379	132	6
BCL7C	6	0.99851	0.99852	0.999911	17207	0	0.0014945	0.0066525	0.81379	130	6
C8orf48	3	0.99866	0.99867	0.999911	17208	0	0.0013397	0.0059804	0.81379	120	3
RSPH9	6	0.99867	0.99868	0.999911	17209	0	0.001335	0.005962	0.81379	119	6
YWHAQ	1	0.99875	0.99875	0.999911	17210	0	0.0012538	0.0056139	0.81379	115	1
NCAN	6	0.99876	0.99876	0.999911	17211	0	0.0012446	0.0055749	0.81379	114	6
SAMD9L	6	0.99876	0.99877	0.999911	17214	0	0.0012356	0.0055393	0.81379	110	6
DPYS	6	0.99876	0.99877	0.999911	17212	0	0.0012406	0.0055628	0.81379	112	6
IWS1	6	0.99876	0.99877	0.999911	17213	0	0.0012399	0.0055559	0.81379	111	6
SORL1	6	0.99881	0.99882	0.999911	17215	0	0.0011924	0.0053468	0.81379	107	6
NCMAP	5	0.99882	0.99883	0.999911	17217	0	0.0011787	0.0052859	0.81379	105	5
LRP2BP	6	0.99882	0.99883	0.999911	17216	0	0.0011799	0.0052923	0.81379	106	6
BCMO1	6	0.99885	0.99886	0.999911	17218	0	0.0011502	0.0051688	0.81379	102	6
NXPH3	6	0.99886	0.99887	0.999911	17219	0	0.0011356	0.0051096	0.81379	101	6
ABAT	6	0.99903	0.99904	0.999964	17220	0	0.00096885	0.0043882	0.81379	92	6
KIAA1279	6	0.09457	0.22287	0.97653	3933	4	0.0050568	0.019984	0.815307	419	2
KBTBD8	6	0.10572	0.24242	0.982777	4250	2	0.0050682	0.020026	0.815307	420	4
ALAD	6	0.10597	0.24286	0.982777	4255	2	0.0048636	0.019314	0.815307	407	3
TNNI3K	6	0.19903	0.37719	0.999911	6362	3	0.0054477	0.021322	0.815307	444	2
TMEM41A	6	0.20705	0.38619	0.999911	6508	1	0.0055006	0.0215	0.815307	450	5
DAO	6	0.21285	0.39266	0.999911	6615	2	0.005466	0.021387	0.815307	446	4
DNAL1	5	0.22744	0.40886	0.999911	6852	2	0.0052179	0.020539	0.815307	425	2
DEDD	6	0.23218	0.41415	0.999911	6931	3	0.0053061	0.020813	0.815307	431	2
ARHGEF10	6	0.26297	0.44811	0.999911	7476	1	0.0053127	0.02084	0.815307	432	5
MAN1B1	6	0.26436	0.44964	0.999911	7503	3	0.0052794	0.020721	0.815307	430	3
SLC16A4	6	0.26732	0.45284	0.999911	7558	2	0.0049503	0.019617	0.815307	413	3
ABCB4	6	0.28013	0.46663	0.999911	7784	1	0.0049314	0.019534	0.815307	411	5
CYP2E1	6	0.32893	0.51709	0.999911	8611	2	0.0050167	0.019853	0.815307	416	3
C2orf82	6	0.33245	0.52066	0.999911	8660	1	0.0050183	0.019856	0.815307	417	5
C1orf95	6	0.37962	0.56665	0.999911	9419	3	0.0048849	0.019381	0.815307	409	3
IPO5	6	0.38682	0.57366	0.999911	9513	2	0.0049144	0.01947	0.815307	410	2
OGDHL	6	0.41343	0.59935	0.999911	9958	3	0.0048195	0.019161	0.815307	405	3
TMEM132E	6	0.41389	0.5998	0.999911	9969	2	0.0053414	0.020945	0.815307	437	4
PAK7	6	0.42679	0.61215	0.999911	10175	2	0.0055851	0.021773	0.815307	460	3
GUCY1A2	6	0.46943	0.64009	0.999911	10632	1	0.0048527	0.019276	0.815307	406	5
C17orf82	5	0.49609	0.65789	0.999911	10964	2	0.0049453	0.019596	0.815307	412	1
PLK3	6	0.51831	0.67219	0.999911	11209	2	0.0051995	0.020478	0.815307	424	3
TRIM6	6	0.54259	0.68792	0.999911	11482	1	0.0055281	0.0216	0.815307	453	5
CHD6	6	0.5829	0.7145	0.999911	11948	2	0.0053949	0.021139	0.815307	441	4
GSTT1	6	0.62567	0.74371	0.999911	12455	2	0.0055938	0.021805	0.815307	461	3
KDM1B	6	0.66717	0.77178	0.999911	12951	2	0.0053208	0.020872	0.815307	434	4
NME2	6	0.67727	0.77856	0.999911	13084	2	0.0052775	0.020718	0.815307	429	2
SEPHS2	6	0.70275	0.79614	0.999911	13383	1	0.0055391	0.021635	0.815307	455	4
EGFP	22	0.71932	0.80793	0.999911	13577	7	0.005015	0.019846	0.815307	415	14
CNNM3	6	0.73293	0.81778	0.999911	13744	2	0.0053429	0.020953	0.815307	438	3
SGCD	6	0.75775	0.83178	0.999911	13994	1	0.0054737	0.021408	0.815307	447	5
CCDC102A	6	0.77343	0.83857	0.999911	14117	1	0.0055263	0.02159	0.815307	452	4
TMEM181	6	0.78049	0.84167	0.999911	14172	1	0.0053159	0.020851	0.815307	433	4
NT5E	6	0.82789	0.86469	0.999911	14578	1	0.0055312	0.021612	0.815307	454	3
DNAH7	6	0.82878	0.86516	0.999911	14591	1	0.0054601	0.021363	0.815307	445	5
PARP14	6	0.84768	0.87534	0.999911	14791	1	0.0054782	0.02142	0.815307	448	4
NSMAF	6	0.86622	0.88606	0.999911	14979	1	0.005524	0.021585	0.815307	451	5
HPN	6	0.8735	0.89048	0.999911	15049	1	0.005333	0.020917	0.815307	436	5
ZNF841	3	0.91769	0.92097	0.999911	15637	0	0.0054271	0.021247	0.815307	443	1
PROCA1	6	0.93233	0.9332	0.999911	15861	1	0.0055724	0.021734	0.815307	458	5
DCP1B	6	0.94168	0.94167	0.999911	16025	1	0.0055713	0.02173	0.815307	457	5
C11orf52	6	0.94951	0.94938	0.999911	16172	0	0.0053596	0.021015	0.815307	439	4
GPR32	3	0.95667	0.95646	0.999911	16287	0	0.0052634	0.020679	0.815307	426	3
RSPO4	6	0.95823	0.95802	0.999911	16323	0	0.0053294	0.020905	0.815307	435	4
PAPD5	6	0.9618	0.96154	0.999911	16394	0	0.0048075	0.019122	0.815307	403	4
COG4	6	0.97038	0.9702	0.999911	16593	0	0.0050996	0.020146	0.815307	422	4
CCDC174	6	0.97929	0.97921	0.999911	16760	0	0.0051466	0.020309	0.815307	423	5
MCU	6	0.97953	0.97945	0.999911	16767	0	0.0050306	0.019897	0.815307	418	5
CSK	6	0.98488	0.98478	0.999911	16889	0	0.0050776	0.020064	0.815307	421	5
ADAMTS5	6	0.9874	0.98732	0.999911	16950	0	0.0054216	0.021224	0.815307	442	4
C16orf96	6	0.98821	0.98815	0.999911	16968	0	0.0052706	0.020698	0.815307	427	5
DRAM2	3	0.99442	0.99441	0.999911	17114	0	0.0055781	0.021751	0.815307	459	3
C14orf1	5	0.99444	0.99443	0.999911	17115	0	0.0055625	0.021705	0.815307	456	5
NKAIN2	4	0.9945	0.9945	0.999911	17118	0	0.005497	0.021491	0.815307	449	4
PLEKHF2	3	0.99472	0.99472	0.999911	17123	0	0.0052758	0.020714	0.815307	428	3
TSPO	6	0.99474	0.99475	0.999911	17125	0	0.0053938	0.021133	0.815307	440	5
EIF3E	1	0.99501	0.99502	0.999911	17128	0	0.004988	0.019749	0.815307	414	1
OR1J2	2	0.99514	0.99515	0.999911	17134	0	0.0048642	0.019315	0.815307	408	2
C14orf177	2	0.99519	0.99521	0.999911	17135	0	0.0048086	0.019124	0.815307	404	2
CCIN	6	0.10356	0.23867	0.982554	4187	2	0.005614	0.021871	0.816007	462	4
ST6GALNAC6	6	0.19867	0.37678	0.999911	6354	2	0.0056368	0.021953	0.817302	463	4
DLX2	6	0.078357	0.1938	0.96654	3448	3	0.0056699	0.022058	0.817662	465	3
CNTFR	6	0.65493	0.76355	0.999911	12815	1	0.0056575	0.022032	0.817662	464	4
PTPN3	6	0.021195	0.069435	0.872339	1367	5	0.0057353	0.022277	0.817748	468	1
NEIL3	6	0.10342	0.23842	0.982554	4182	2	0.0058006	0.022496	0.817748	473	3
TENM3	6	0.15505	0.32496	0.999911	5553	3	0.0065197	0.024857	0.817748	523	2
GORASP2	6	0.16764	0.34172	0.999911	5799	3	0.006389	0.024427	0.817748	513	3
SIRT1	6	0.18492	0.3613	0.999911	6091	2	0.0065206	0.024859	0.817748	524	3
ZBED2	4	0.21974	0.40031	0.999911	6728	2	0.0058784	0.022747	0.817748	476	1
NAV1	6	0.22968	0.41134	0.999911	6893	3	0.0064543	0.024634	0.817748	518	1
ERO1L	5	0.25579	0.44029	0.999911	7343	3	0.0064795	0.024721	0.817748	521	2
THAP8	6	0.29431	0.48184	0.999911	8012	2	0.0063524	0.024315	0.817748	511	3
CDKL2	6	0.30362	0.49139	0.999911	8165	2	0.0062494	0.02398	0.817748	501	4
MYLPF	6	0.31111	0.49899	0.999911	8290	1	0.0060964	0.023477	0.817748	491	5
ARHGEF38	6	0.33379	0.522	0.999911	8678	1	0.0063669	0.024369	0.817748	512	5
SOGA3	6	0.36589	0.55334	0.999911	9191	1	0.0057695	0.02239	0.817748	470	3
MTMR10	6	0.39022	0.57689	0.999911	9564	2	0.0061282	0.023582	0.817748	493	4
SYT12	6	0.41182	0.59781	0.999911	9929	2	0.0060622	0.023362	0.817748	489	3
YY2	6	0.46899	0.63978	0.999911	10627	2	0.0061765	0.023736	0.817748	496	4
PRKDC	6	0.48869	0.65287	0.999911	10884	2	0.0059968	0.023142	0.817748	478	3
MAN2A2	6	0.55031	0.69307	0.999911	11564	2	0.005866	0.022704	0.817748	475	2
NT5C2	6	0.57272	0.70777	0.999911	11822	1	0.0060381	0.023288	0.817748	484	3
TUSC3	6	0.61012	0.73296	0.999911	12263	1	0.0062898	0.024109	0.817748	505	4
ZNF396	4	0.62849	0.74571	0.999911	12490	1	0.0064452	0.024604	0.817748	516	3
SLC35A5	5	0.64202	0.75491	0.999911	12673	1	0.0060529	0.023332	0.817748	487	3
BCKDK	6	0.65365	0.76269	0.999911	12800	1	0.0060605	0.023355	0.817748	488	5
FAM126B	6	0.66324	0.76916	0.999911	12899	1	0.0060363	0.023282	0.817748	483	4
ANKRD23	6	0.69509	0.79076	0.999911	13285	2	0.0057464	0.022315	0.817748	469	3
FAM174A	4	0.72942	0.81521	0.999911	13699	1	0.0061836	0.023761	0.817748	497	3
DUSP21	3	0.74278	0.82498	0.999911	13884	1	0.0064354	0.024569	0.817748	514	2
TAF3	6	0.76767	0.83605	0.999911	14068	1	0.0062708	0.024051	0.817748	502	4
MIOX	6	0.77904	0.84103	0.999911	14156	1	0.0063224	0.024211	0.817748	508	3
LRGUK	6	0.81202	0.85656	0.999911	14437	1	0.0061315	0.023592	0.817748	494	4
BCO2	6	0.81396	0.85754	0.999911	14459	1	0.0060513	0.023325	0.817748	486	4
ANKRD6	6	0.82025	0.86075	0.999911	14505	1	0.0063026	0.024146	0.817748	506	4
SLC39A14	6	0.82372	0.86252	0.999911	14538	1	0.0063472	0.024297	0.817748	510	2
EFCAB14	6	0.83458	0.86823	0.999911	14648	1	0.0060287	0.023258	0.817748	482	5
NLN	6	0.83969	0.87096	0.999911	14697	1	0.0062835	0.024092	0.817748	504	3
ZACN	6	0.85199	0.87776	0.999911	14839	1	0.0062002	0.023813	0.817748	498	4
BET1L	6	0.87474	0.89124	0.999911	15069	1	0.0063333	0.024253	0.817748	509	3
RDH5	6	0.89936	0.90732	0.999911	15388	1	0.0061275	0.023579	0.817748	492	2
SPTY2D1	6	0.912	0.91648	0.999911	15557	1	0.0060239	0.023239	0.817748	481	5
DDI2	6	0.9222	0.92459	0.999911	15705	1	0.0063143	0.024186	0.817748	507	3
SLCO1C1	6	0.93452	0.9351	0.999911	15905	1	0.0057101	0.022197	0.817748	466	5
SLC7A4	6	0.96719	0.96702	0.999911	16526	0	0.0062147	0.023864	0.817748	499	5
ZWILCH	6	0.96919	0.96904	0.999911	16570	0	0.0057302	0.022261	0.817748	467	4
VAV3	6	0.97546	0.9753	0.999911	16703	0	0.0057729	0.022398	0.817748	471	4
APLNR	6	0.97692	0.97674	0.999911	16723	0	0.0060649	0.02337	0.817748	490	4
FAM57B	6	0.98101	0.98093	0.999911	16796	0	0.0064771	0.024717	0.817748	520	5
PGM2L1	6	0.98241	0.98229	0.999911	16823	0	0.006226	0.023902	0.817748	500	5
CILP	6	0.98583	0.98577	0.999911	16911	0	0.0060069	0.023177	0.817748	479	5
HEY2	6	0.98892	0.98887	0.999911	16983	0	0.0064385	0.024579	0.817748	515	5
PVRL1	6	0.99222	0.99218	0.999911	17062	0	0.0061497	0.023654	0.817748	495	4
CXCL9	4	0.99344	0.99341	0.999911	17089	0	0.0064459	0.024607	0.817748	517	4
SYCP1	4	0.99351	0.99347	0.999911	17090	0	0.006495	0.024766	0.817748	522	4
KIAA0754	5	0.99354	0.99351	0.999911	17091	0	0.0064557	0.024638	0.817748	519	5
SPIN4	5	0.99372	0.99369	0.999911	17097	0	0.0062765	0.024067	0.817748	503	5
BDNF	4	0.99396	0.99395	0.999911	17101	0	0.0060433	0.023306	0.817748	485	4
EXOC5	2	0.99399	0.99399	0.999911	17102	0	0.0060083	0.023187	0.817748	480	2
GSTM3	3	0.99406	0.99405	0.999911	17104	0	0.0059363	0.022934	0.817748	477	3
SULT1E1	3	0.9942	0.99419	0.999911	17108	0	0.005799	0.022489	0.817748	472	3
ANK1	6	0.99508	0.9951	0.999911	17132	0	0.0058107	0.022533	0.817748	474	5
GFPT1	6	0.11624	0.2607	0.984019	4561	2	0.0065434	0.02493	0.818027	525	4
SSFA2	6	0.87818	0.89336	0.999911	15115	1	0.0065509	0.024963	0.818027	526	3
INPP5F	6	0.0078259	0.029285	0.765783	659	4	0.0067484	0.025605	0.819557	533	2
FAM149B1	6	0.12974	0.28352	0.988425	4940	3	0.00679	0.02573	0.819557	537	3
TRADD	6	0.27046	0.45622	0.999911	7622	2	0.006585	0.025071	0.819557	527	3
AKAP4	6	0.31944	0.50741	0.999911	8425	3	0.0068464	0.025913	0.819557	545	2
NPC2	4	0.51101	0.66748	0.999911	11118	1	0.006603	0.025122	0.819557	528	3
MCHR2	6	0.54009	0.68631	0.999911	11453	1	0.006775	0.025688	0.819557	535	2
GPR151	6	0.55908	0.69885	0.999911	11659	1	0.0066342	0.025229	0.819557	530	5
WWOX	6	0.56394	0.70204	0.999911	11710	2	0.0068014	0.025764	0.819557	539	3
AKAP7	5	0.60636	0.73037	0.999911	12212	1	0.006752	0.025619	0.819557	534	4
TMEM246	5	0.60758	0.73121	0.999911	12233	1	0.0067911	0.025732	0.819557	538	4
OR6K2	4	0.75118	0.82913	0.999911	13959	1	0.0068374	0.025881	0.819557	544	1
RIPPLY1	5	0.84641	0.87464	0.999911	14778	1	0.0067195	0.025509	0.819557	532	3
CACNA1H	6	0.91658	0.92006	0.999911	15625	1	0.006783	0.025712	0.819557	536	4
GNB4	6	0.9475	0.94735	0.999911	16136	0	0.0068092	0.025788	0.819557	540	5
MFSD9	6	0.95034	0.95019	0.999911	16191	0	0.0068128	0.025794	0.819557	541	4
C21orf33	6	0.95622	0.95601	0.999911	16284	0	0.0066504	0.025276	0.819557	531	2
OR2AE1	4	0.98352	0.98345	0.999911	16851	0	0.0066116	0.025156	0.819557	529	4
CCDC160	2	0.98539	0.9853	0.999911	16899	0	0.0068324	0.025865	0.819557	543	2
OR10J1	3	0.99318	0.99315	0.999911	17083	0	0.0068154	0.025802	0.819557	542	3
ZMIZ2	6	0.068182	0.17468	0.964202	3112	2	0.006977	0.026339	0.820737	551	3
NPC1L1	6	0.10547	0.24198	0.982777	4241	2	0.0071076	0.026784	0.820737	558	2
SUSD3	6	0.23524	0.41763	0.999911	6984	3	0.0070071	0.026444	0.820737	552	3
BACH1	6	0.27595	0.46212	0.999911	7709	2	0.0071722	0.026979	0.820737	562	3
LSP1	6	0.40732	0.59344	0.999911	9855	1	0.0072383	0.027187	0.820737	568	3
TLR7	5	0.48581	0.65096	0.999911	10845	2	0.0072395	0.027195	0.820737	569	2
PGC	6	0.50251	0.66211	0.999911	11035	2	0.0072565	0.027249	0.820737	571	4
MKRN2	6	0.52038	0.6735	0.999911	11236	1	0.0069117	0.026129	0.820737	548	4
EBF1	6	0.54129	0.68709	0.999911	11468	2	0.0071661	0.026963	0.820737	561	4
ALDH2	6	0.54318	0.68832	0.999911	11487	2	0.0070423	0.026556	0.820737	555	3
ADCYAP1R1	6	0.58252	0.71429	0.999911	11943	1	0.0068783	0.026013	0.820737	546	4
MS4A3	5	0.69563	0.79115	0.999911	13291	1	0.0068881	0.026045	0.820737	547	4
TMEM126A	3	0.70676	0.79892	0.999911	13433	1	0.0072142	0.027108	0.820737	565	2
RNF34	6	0.76258	0.83387	0.999911	14037	1	0.0071729	0.026983	0.820737	563	4
HTR1D	5	0.79972	0.85054	0.999911	14338	1	0.0069206	0.026152	0.820737	549	4
TRMT10A	2	0.85849	0.8815	0.999911	14906	0	0.0072688	0.027283	0.820737	573	2
ANKMY2	6	0.87056	0.88869	0.999911	15023	1	0.0072638	0.027272	0.820737	572	3
RRAGC	5	0.92554	0.92738	0.999911	15747	0	0.0072227	0.027134	0.820737	566	4
MAPKAPK5	6	0.9458	0.94566	0.999911	16112	1	0.0071623	0.026954	0.820737	560	5
TPH1	4	0.9593	0.95909	0.999911	16344	0	0.0069479	0.026242	0.820737	550	3
CACHD1	6	0.9594	0.95919	0.999911	16350	0	0.0072429	0.027208	0.820737	570	5
TRIM58	6	0.96207	0.96179	0.999911	16404	0	0.0070406	0.026549	0.820737	554	3
RSBN1	6	0.96295	0.9627	0.999911	16429	0	0.0071328	0.026858	0.820737	559	5
S100A12	4	0.97294	0.97279	0.999911	16644	0	0.0072038	0.027069	0.820737	564	3
C1orf189	4	0.988	0.98794	0.999911	16961	0	0.0070299	0.026513	0.820737	553	4
CRISP1	4	0.99277	0.99275	0.999911	17078	0	0.0072297	0.02716	0.820737	567	4
FILIP1L	5	0.99295	0.99291	0.999911	17080	0	0.007046	0.026564	0.820737	556	5
FHAD1	6	0.99472	0.99472	0.999911	17124	0	0.0070513	0.026584	0.820737	557	5
AGBL1	6	0.42217	0.60771	0.999911	10097	2	0.0073036	0.027393	0.821533	574	3
PCGF5	2	0.99269	0.99266	0.999911	17077	0	0.0073068	0.027405	0.821533	575	2
OR4F6	3	0.23549	0.41789	0.999911	6993	1	0.0073235	0.027458	0.821705	576	2
NHLH2	4	0.99262	0.99259	0.999911	17074	0	0.0073841	0.027647	0.825926	577	4
CACNA1D	6	0.67741	0.77866	0.999911	13087	1	0.0074272	0.027803	0.82628	580	4
CNPY2	6	0.68212	0.78186	0.999911	13143	2	0.0074205	0.027774	0.82628	579	4
AZIN1	3	0.99258	0.99255	0.999911	17073	0	0.0074162	0.02776	0.82628	578	3
C15orf37	4	0.99255	0.99251	0.999911	17071	0	0.007455	0.027898	0.827687	581	4
CPEB1	6	0.92471	0.92669	0.999911	15737	1	0.0074755	0.027969	0.82834	582	2
VGLL2	6	0.012711	0.044433	0.822652	926	2	0.0075066	0.028068	0.828593	583	3
FAM19A1	6	0.29393	0.48143	0.999911	8006	1	0.0075647	0.028255	0.828593	587	4
GJC1	6	0.35731	0.54503	0.999911	9060	2	0.0075376	0.028178	0.828593	586	4
RAB41	6	0.37571	0.56287	0.999911	9353	2	0.0075238	0.028132	0.828593	585	3
MOSPD3	6	0.68945	0.78679	0.999911	13221	2	0.0075169	0.028104	0.828593	584	3
TRMT10B	5	0.99243	0.99239	0.999911	17066	0	0.0075681	0.028266	0.828593	588	5
USP44	6	0.32121	0.5092	0.999911	8463	2	0.0076131	0.028404	0.831238	589	4
UBAP1	6	0.8453	0.87402	0.999911	14768	1	0.00763	0.028465	0.831608	590	3
SMOX	6	0.18625	0.36279	0.999911	6118	3	0.0076953	0.028676	0.832653	592	3
LRRC2	5	0.41534	0.60117	0.999911	9994	1	0.0077088	0.028719	0.832653	594	3
BAX	6	0.6613	0.76785	0.999911	12876	1	0.0077359	0.028808	0.832653	596	4
IGF2	6	0.74358	0.82558	0.999911	13897	1	0.0077465	0.028839	0.832653	597	3
FICD	6	0.96611	0.96591	0.999911	16505	0	0.0077255	0.02877	0.832653	595	3
LXN	4	0.97928	0.9792	0.999911	16759	0	0.0076759	0.028606	0.832653	591	4
CCDC122	1	0.9923	0.99226	0.999911	17065	0	0.0077037	0.028701	0.832653	593	1
KCNH2	6	0.019699	0.065139	0.869358	1291	4	0.0080217	0.029696	0.833211	612	1
CRCT1	3	0.072282	0.1825	0.96654	3244	1	0.0082369	0.030364	0.833211	626	2
USP45	5	0.11041	0.25061	0.982777	4388	2	0.0082483	0.030395	0.833211	627	3
KLKB1	6	0.13721	0.29586	0.992347	5135	3	0.0082947	0.03055	0.833211	632	3
S1PR1	4	0.21682	0.39704	0.999911	6674	1	0.0080533	0.029805	0.833211	614	3
ANGEL1	6	0.29071	0.47801	0.999911	7955	3	0.0082175	0.030304	0.833211	623	2
LGSN	6	0.30922	0.49707	0.999911	8260	3	0.0082827	0.030511	0.833211	631	3
ADAMTS19	6	0.31773	0.50571	0.999911	8401	2	0.0078911	0.029276	0.833211	604	2
KEL	6	0.37214	0.55941	0.999911	9297	3	0.0079155	0.029364	0.833211	605	2
FCAMR	6	0.38864	0.57543	0.999911	9538	2	0.0082813	0.030509	0.833211	630	3
SIRT5	6	0.39711	0.58363	0.999911	9672	3	0.0078896	0.029268	0.833211	603	3
C6orf163	6	0.4594	0.6335	0.999911	10516	1	0.0080869	0.029913	0.833211	615	3
DPP4	6	0.47002	0.64049	0.999911	10642	2	0.0079864	0.029587	0.833211	609	2
PARPBP	5	0.50067	0.66093	0.999911	11013	1	0.0082675	0.030466	0.833211	629	4
UBE2J2	6	0.5638	0.70195	0.999911	11708	2	0.0078378	0.029097	0.833211	599	4
RNF25	6	0.64512	0.75697	0.999911	12702	1	0.00821	0.030279	0.833211	622	5
GNS	6	0.66844	0.77264	0.999911	12963	2	0.0078569	0.029163	0.833211	601	4
AP5B1	5	0.6705	0.77403	0.999911	12990	1	0.0080449	0.029775	0.833211	613	3
DOK3	6	0.78337	0.84295	0.999911	14190	1	0.0082297	0.030341	0.833211	625	4
SDHB	6	0.79184	0.84684	0.999911	14267	1	0.0078269	0.029065	0.833211	598	5
LRP3	6	0.81883	0.86003	0.999911	14495	1	0.0081522	0.030112	0.833211	620	3
TMEM151B	6	0.88719	0.89906	0.999911	15214	1	0.0079564	0.0295	0.833211	606	5
RLBP1	6	0.90118	0.90858	0.999911	15406	1	0.0082212	0.030314	0.833211	624	5
BBS9	6	0.90695	0.91269	0.999911	15498	1	0.0080894	0.029917	0.833211	616	4
C1orf61	5	0.9263	0.92803	0.999911	15759	0	0.0079629	0.029517	0.833211	607	3
KIAA0556	6	0.93305	0.93381	0.999911	15877	1	0.0081981	0.030242	0.833211	621	5
NDN	6	0.93824	0.93843	0.999911	15972	1	0.0078449	0.029124	0.833211	600	4
TWIST2	6	0.9606	0.96036	0.999911	16376	0	0.0082541	0.030417	0.833211	628	5
HTR3D	6	0.96215	0.96188	0.999911	16406	0	0.0081296	0.030039	0.833211	617	5
VCAM1	6	0.98387	0.98378	0.999911	16863	0	0.0078615	0.029175	0.833211	602	5
SENP1	6	0.99024	0.99021	0.999911	17017	0	0.0081311	0.030044	0.833211	618	5
CCDC172	3	0.99185	0.99182	0.999911	17054	0	0.0081487	0.0301	0.833211	619	3
FBXO45	4	0.992	0.99197	0.999911	17058	0	0.008004	0.029645	0.833211	611	4
MTO1	6	0.99263	0.9926	0.999911	17075	0	0.0079896	0.029598	0.833211	610	5
TRPV6	6	0.99614	0.99616	0.999911	17151	0	0.0079676	0.029533	0.833211	608	5
CAP2	6	0.19266	0.37008	0.999911	6245	2	0.0084132	0.030916	0.837628	636	2
HOOK3	6	0.37868	0.56572	0.999911	9398	1	0.008426	0.030955	0.837628	637	5
IFNGR1	6	0.42764	0.61277	0.999911	10185	2	0.0083745	0.030795	0.837628	633	3
RPS6KA6	6	0.80701	0.85411	0.999911	14399	1	0.0083995	0.030878	0.837628	635	4
DGKA	6	0.97511	0.97494	0.999911	16692	0	0.0083818	0.030816	0.837628	634	5
INSL5	4	0.97724	0.97705	0.999911	16730	0	0.0084488	0.031031	0.838364	638	3
EXD3	6	0.020665	0.067961	0.872339	1337	4	0.0084784	0.031117	0.839392	639	2
HRC	6	0.87798	0.89323	0.999911	15113	1	0.0084998	0.03119	0.840045	640	4
TBC1D19	6	0.099092	0.23085	0.981308	4054	3	0.0085277	0.031286	0.84093	641	2
CCDC39	6	0.10012	0.23264	0.981308	4085	3	0.0085437	0.031337	0.84093	642	1
PPAPDC3	6	0.52869	0.67886	0.999911	11324	2	0.0085544	0.03137	0.84093	643	3
DCLRE1B	6	0.029362	0.092089	0.894327	1774	4	0.0086089	0.03153	0.84262	645	2
CBL	6	0.39661	0.58317	0.999911	9665	3	0.0086011	0.031506	0.84262	644	3
SLC16A8	6	0.51711	0.67145	0.999911	11193	1	0.0086651	0.031704	0.843334	648	4
CCDC126	3	0.73196	0.81707	0.999911	13737	1	0.0086499	0.031662	0.843334	646	2
KIF13A	6	0.85384	0.87882	0.999911	14854	1	0.0086599	0.031689	0.843334	647	3
C16orf74	6	0.010825	0.038697	0.802847	826	2	0.0089678	0.03262	0.84624	659	4
GPR31	6	0.01661	0.056139	0.857102	1129	2	0.0094979	0.034298	0.84624	695	3
DZIP3	6	0.074776	0.18724	0.96654	3328	2	0.0093322	0.033792	0.84624	677	4
CSF1R	6	0.11358	0.25603	0.982965	4488	3	0.0094664	0.034204	0.84624	690	3
MCOLN1	6	0.12056	0.26802	0.984268	4686	1	0.0090402	0.032852	0.84624	662	2
IFNLR1	6	0.12195	0.27041	0.986094	4726	2	0.009421	0.034061	0.84624	685	4
ZNF169	6	0.13306	0.28902	0.990628	5024	1	0.0093387	0.033811	0.84624	679	5
UBP1	6	0.14119	0.30253	0.992896	5252	3	0.0093914	0.033968	0.84624	681	3
SLC26A6	6	0.15579	0.3261	0.999911	5573	3	0.0088698	0.032334	0.84624	653	2
ADCY7	6	0.16128	0.33449	0.999911	5694	2	0.0090176	0.032781	0.84624	661	3
RAPH1	6	0.1616	0.33484	0.999911	5699	3	0.0088599	0.032302	0.84624	652	3
MYCBP2	6	0.1916	0.36887	0.999911	6226	2	0.0094469	0.034149	0.84624	687	4
MST1R	6	0.22973	0.4114	0.999911	6894	2	0.0089525	0.032576	0.84624	658	4
PLA2G16	6	0.23258	0.41461	0.999911	6942	1	0.0094909	0.034273	0.84624	693	4
APBB2	6	0.27895	0.46533	0.999911	7769	2	0.0092133	0.03342	0.84624	672	4
COX7A1	4	0.28786	0.47497	0.999911	7907	2	0.009058	0.032907	0.84624	663	1
BAHD1	6	0.31628	0.50426	0.999911	8376	3	0.0091958	0.033354	0.84624	671	1
TNMD	4	0.35534	0.5431	0.999911	9034	2	0.0093012	0.033698	0.84624	675	2
TMEM164	6	0.37209	0.55936	0.999911	9296	2	0.0091534	0.033222	0.84624	668	4
TMEM200B	4	0.3776	0.56469	0.999911	9381	1	0.0095364	0.034423	0.84624	700	2
SP4	6	0.39325	0.5799	0.999911	9612	1	0.0094566	0.034177	0.84624	688	2
LGI1	6	0.44051	0.62115	0.999911	10320	1	0.0093436	0.033828	0.84624	680	5
CSAD	6	0.46588	0.63773	0.999911	10595	2	0.0092255	0.033465	0.84624	674	4
ETV3L	2	0.49248	0.65543	0.999911	10928	1	0.0091664	0.03326	0.84624	669	1
UNC5CL	6	0.50539	0.66395	0.999911	11062	2	0.009587	0.034602	0.84624	703	3
ZNF540	3	0.52016	0.67336	0.999911	11233	1	0.0094804	0.034237	0.84624	692	2
CLCN2	6	0.53184	0.68093	0.999911	11358	1	0.0094971	0.034294	0.84624	694	3
CCDC8	4	0.54633	0.69044	0.999911	11520	1	0.0095899	0.034612	0.84624	705	3
CNIH3	6	0.56235	0.701	0.999911	11689	2	0.0090854	0.033001	0.84624	665	3
RSPH3	6	0.59581	0.72304	0.999911	12094	2	0.0095344	0.034418	0.84624	699	4
CCDC117	6	0.60034	0.72623	0.999911	12147	1	0.0094111	0.034031	0.84624	684	4
SYT6	6	0.64198	0.75488	0.999911	12672	1	0.0095279	0.034392	0.84624	698	4
TEX2	6	0.65344	0.76255	0.999911	12798	1	0.0090654	0.032931	0.84624	664	4
HIC1	6	0.74527	0.82663	0.999911	13914	1	0.0094105	0.034031	0.84624	683	4
TRABD2A	6	0.78275	0.84266	0.999911	14184	1	0.009337	0.033804	0.84624	678	5
GPC4	6	0.80156	0.85143	0.999911	14353	1	0.0092141	0.033424	0.84624	673	4
STK16	5	0.81335	0.85723	0.999911	14447	1	0.0093945	0.033977	0.84624	682	3
KCNJ5	4	0.84596	0.87439	0.999911	14775	1	0.0087581	0.031989	0.84624	649	3
TMEM25	6	0.86546	0.88559	0.999911	14974	1	0.0091156	0.033104	0.84624	667	4
CTTNBP2	6	0.86675	0.88638	0.999911	14985	1	0.0093207	0.033753	0.84624	676	5
EGR2	6	0.89038	0.90112	0.999911	15263	1	0.0095218	0.034375	0.84624	696	3
MED28	4	0.89338	0.90322	0.999911	15296	0	0.0091015	0.033051	0.84624	666	2
KRT75	6	0.90269	0.90965	0.999911	15432	1	0.0089505	0.032572	0.84624	657	5
FAM73A	6	0.915	0.91877	0.999911	15599	1	0.0088902	0.032388	0.84624	654	3
VAT1L	6	0.93608	0.93648	0.999911	15933	1	0.0094798	0.034236	0.84624	691	5
CALN1	6	0.93731	0.93761	0.999911	15956	1	0.0094364	0.034115	0.84624	686	5
TCF4	6	0.94673	0.94656	0.999911	16124	0	0.0088305	0.032212	0.84624	651	5
POGLUT1	6	0.95695	0.95672	0.999911	16297	0	0.0091777	0.0333	0.84624	670	5
CTSL2	5	0.95972	0.9595	0.999911	16359	0	0.0094566	0.034178	0.84624	689	4
FAM19A3	6	0.96325	0.96304	0.999911	16433	0	0.0095479	0.034462	0.84624	701	4
ADC	6	0.96771	0.96756	0.999911	16536	0	0.0089922	0.032693	0.84624	660	5
TIAM1	6	0.97392	0.97376	0.999911	16671	0	0.0095888	0.034608	0.84624	704	5
CLDN12	5	0.97447	0.97434	0.999911	16683	0	0.0095504	0.03447	0.84624	702	4
TNS1	6	0.97833	0.97819	0.999911	16741	0	0.0088203	0.032182	0.84624	650	5
CCL21	2	0.99047	0.99046	0.999911	17025	0	0.0095251	0.034383	0.84624	697	2
MAGEB6	1	0.99107	0.99107	0.999911	17037	0	0.0089301	0.032515	0.84624	656	1
PIAS1	6	0.99513	0.99514	0.999911	17133	0	0.0089014	0.032418	0.84624	655	5
SCIN	6	0.14926	0.31582	0.999911	5420	2	0.00966	0.034848	0.846624	707	4
NLGN2	6	0.16069	0.33378	0.999911	5682	2	0.0096812	0.034907	0.846624	709	4
CNDP2	6	0.21783	0.39814	0.999911	6689	3	0.0097825	0.03522	0.846624	716	2
MARK3	6	0.29124	0.47858	0.999911	7967	2	0.0096862	0.034919	0.846624	710	4
MIER1	6	0.37465	0.56186	0.999911	9340	1	0.0096139	0.034698	0.846624	706	4
TBC1D5	6	0.53138	0.68062	0.999911	11350	2	0.0097799	0.035212	0.846624	715	4
PPT2	6	0.64123	0.75439	0.999911	12655	1	0.0096784	0.034898	0.846624	708	5
SLC35C2	6	0.77945	0.84121	0.999911	14161	1	0.0097173	0.035011	0.846624	712	4
ZNF792	6	0.78421	0.84333	0.999911	14200	1	0.0097226	0.035031	0.846624	713	5
TMTC2	6	0.96751	0.96734	0.999911	16532	0	0.0097673	0.035166	0.846624	714	5
OLIG2	5	0.9832	0.98312	0.999911	16844	0	0.009705	0.034978	0.846624	711	4
CCDC73	3	0.9902	0.99017	0.999911	17014	0	0.0097989	0.035266	0.846624	718	3
S100A4	1	0.99022	0.99018	0.999911	17015	0	0.0097843	0.035227	0.846624	717	1
TMEM180	6	0.26183	0.44687	0.999911	7446	3	0.0098477	0.035419	0.846754	721	3
KIAA1024	6	0.85586	0.87996	0.999911	14880	1	0.00982	0.035332	0.846754	719	5
ACMSD	6	0.97102	0.97087	0.999911	16608	0	0.0098415	0.035399	0.846754	720	4
POU5F2	6	0.038557	0.11475	0.917378	2156	3	0.010226	0.036547	0.847182	742	2
SLC25A20	6	0.055097	0.14897	0.935622	2743	2	0.010108	0.036207	0.847182	732	2
SLC9A3R2	6	0.088864	0.2128	0.976168	3751	3	0.01002	0.03593	0.847182	730	3
HSD17B13	4	0.25259	0.43682	0.999911	7289	1	0.00991	0.035589	0.847182	722	3
ABHD17B	6	0.27005	0.45579	0.999911	7613	2	0.010172	0.036385	0.847182	737	4
CRIP3	6	0.27869	0.46506	0.999911	7760	2	0.0099723	0.035778	0.847182	727	4
RESP18	6	0.36324	0.55082	0.999911	9149	2	0.010304	0.036781	0.847182	748	2
LAD1	6	0.38523	0.57214	0.999911	9490	2	0.0099994	0.035865	0.847182	729	4
DEPDC7	6	0.38635	0.5732	0.999911	9507	3	0.010162	0.036361	0.847182	736	3
SLC24A4	6	0.43134	0.61509	0.999911	10221	2	0.009978	0.035793	0.847182	728	4
CPNE9	6	0.45238	0.62889	0.999911	10448	2	0.01022	0.036529	0.847182	741	4
SPRYD3	6	0.55769	0.69793	0.999911	11639	2	0.010115	0.036222	0.847182	734	4
BHLHE41	5	0.56287	0.70133	0.999911	11696	1	0.0099525	0.035719	0.847182	723	3
FAM47A	4	0.66875	0.77285	0.999911	12968	1	0.010048	0.036025	0.847182	731	3
IL22RA2	5	0.6892	0.78662	0.999911	13219	1	0.0099545	0.035726	0.847182	724	4
BTBD2	6	0.86987	0.88826	0.999911	15017	1	0.0103	0.036774	0.847182	747	5
SFXN1	5	0.88957	0.90061	0.999911	15252	1	0.010112	0.036216	0.847182	733	4
MED23	6	0.90129	0.90867	0.999911	15408	1	0.010173	0.036391	0.847182	738	4
TMEM100	3	0.90365	0.91036	0.999911	15449	0	0.010277	0.036718	0.847182	745	2
WDR35	6	0.90789	0.91338	0.999911	15509	1	0.0099631	0.035757	0.847182	725	5
PGLYRP2	6	0.94502	0.9449	0.999911	16088	1	0.010299	0.036772	0.847182	746	4
SOWAHB	5	0.94522	0.94511	0.999911	16094	0	0.010138	0.036286	0.847182	735	4
CNIH	5	0.98213	0.98202	0.999911	16816	0	0.010262	0.036664	0.847182	743	4
CCDC40	6	0.98337	0.9833	0.999911	16848	0	0.01027	0.036696	0.847182	744	5
ADAMTS17	6	0.98976	0.98972	0.999911	17003	0	0.0099692	0.035775	0.847182	726	5
ZNF568	3	0.98978	0.98974	0.999911	17005	0	0.01022	0.036528	0.847182	740	3
RAB3GAP1	6	0.99089	0.99089	0.999911	17032	0	0.010194	0.036447	0.847182	739	5
RGS22	6	0.99092	0.99092	0.999911	17033	0	0.010316	0.036813	0.847182	749	5
EXO5	4	0.0042076	0.017367	0.705446	422	3	0.010754	0.038188	0.847529	776	1
RFNG	5	0.04217	0.12249	0.927296	2275	3	0.010604	0.037735	0.847529	766	2
SERPINE2	6	0.1596	0.33206	0.999911	5658	1	0.010654	0.037883	0.847529	769	5
SLC1A4	6	0.23264	0.41468	0.999911	6944	3	0.010369	0.036991	0.847529	752	2
PDE1B	6	0.25213	0.43632	0.999911	7282	1	0.010725	0.038115	0.847529	774	4
PCTP	6	0.27484	0.46095	0.999911	7693	1	0.010525	0.037488	0.847529	759	4
FRMD1	6	0.33967	0.52785	0.999911	8776	1	0.010732	0.03813	0.847529	775	4
UBE2G2	6	0.38922	0.57595	0.999911	9544	3	0.010694	0.038006	0.847529	771	2
SPIN1	6	0.4315	0.6152	0.999911	10224	1	0.010434	0.037197	0.847529	754	4
FUT1	4	0.45792	0.63255	0.999911	10503	2	0.010449	0.037242	0.847529	756	2
SULT2B1	6	0.55836	0.69837	0.999911	11651	2	0.010596	0.037704	0.847529	765	4
EFCAB3	5	0.68092	0.78105	0.999911	13129	1	0.010637	0.037839	0.847529	767	4
DCLK1	6	0.72295	0.81051	0.999911	13630	1	0.010583	0.037658	0.847529	764	5
MED15	6	0.79285	0.84731	0.999911	14278	1	0.010565	0.03761	0.847529	763	5
CYP7A1	6	0.9247	0.92668	0.999911	15736	1	0.010559	0.037597	0.847529	762	5
PTPRO	6	0.93074	0.93181	0.999911	15833	1	0.01076	0.038204	0.847529	777	5
ACAD8	6	0.93165	0.93262	0.999911	15850	1	0.010539	0.03753	0.847529	761	4
GPC1	6	0.94888	0.94875	0.999911	16162	0	0.010336	0.036887	0.847529	750	5
TRIM35	6	0.95905	0.95884	0.999911	16340	0	0.010687	0.037984	0.847529	770	5
WDR64	6	0.96342	0.96321	0.999911	16439	0	0.010449	0.037242	0.847529	755	5
NRG3	6	0.96577	0.96557	0.999911	16498	0	0.01053	0.037504	0.847529	760	5
RFX8	6	0.96598	0.9658	0.999911	16502	0	0.010495	0.037392	0.847529	758	3
OR6C76	3	0.96701	0.96683	0.999911	16521	0	0.01072	0.038102	0.847529	773	3
AKAP10	6	0.97203	0.97189	0.999911	16620	0	0.010702	0.038031	0.847529	772	5
CYP19A1	6	0.98092	0.98085	0.999911	16794	0	0.010432	0.037186	0.847529	753	4
OR51I2	3	0.98398	0.98389	0.999911	16868	0	0.010362	0.036962	0.847529	751	3
SLN	1	0.98935	0.98931	0.999911	16993	0	0.010649	0.037869	0.847529	768	1
STT3A	6	0.99506	0.99508	0.999911	17130	0	0.01049	0.037374	0.847529	757	5
ILDR2	6	0.052621	0.14397	0.934719	2654	4	0.01115	0.03941	0.848395	796	2
DHRS7C	6	0.081066	0.19873	0.969044	3535	4	0.01102	0.039025	0.848395	789	1
SLC46A1	6	0.098429	0.22968	0.980612	4033	2	0.011216	0.039616	0.848395	801	4
STS	6	0.16034	0.33324	0.999911	5676	2	0.010979	0.038889	0.848395	786	3
IQCF1	3	0.1727	0.34743	0.999911	5890	1	0.011112	0.03929	0.848395	795	2
NEURL	6	0.24281	0.42609	0.999911	7127	3	0.011085	0.0392	0.848395	792	2
CD300LB	6	0.29238	0.47982	0.999911	7986	2	0.011095	0.039234	0.848395	794	3
GCM2	6	0.34091	0.52904	0.999911	8801	2	0.011156	0.039434	0.848395	797	3
UTRN	6	0.3558	0.54354	0.999911	9043	3	0.011215	0.039612	0.848395	800	3
LMBRD1	5	0.40249	0.58881	0.999911	9764	2	0.010892	0.038607	0.848395	783	3
ZDHHC9	6	0.41809	0.60382	0.999911	10034	3	0.011045	0.039096	0.848395	791	2
LDB1	6	0.46398	0.63648	0.999911	10570	1	0.010955	0.038811	0.848395	785	3
GRAMD1C	6	0.50512	0.66377	0.999911	11059	1	0.011252	0.039715	0.848395	806	5
NMRAL1	6	0.50934	0.66643	0.999911	11100	1	0.011228	0.039647	0.848395	803	5
NGFR	6	0.56502	0.70274	0.999911	11723	2	0.01104	0.039086	0.848395	790	3
APOL2	6	0.60906	0.73223	0.999911	12252	2	0.011092	0.039224	0.848395	793	4
PINK1	6	0.60954	0.73256	0.999911	12259	2	0.010841	0.038454	0.848395	780	4
LRRC53	6	0.68281	0.78233	0.999911	13156	1	0.010918	0.038685	0.848395	784	5
PPP1R12B	6	0.69054	0.78753	0.999911	13234	2	0.01125	0.039708	0.848395	805	4
RPH3A	6	0.82842	0.86499	0.999911	14583	1	0.010848	0.03847	0.848395	781	4
CIITA	6	0.84208	0.87225	0.999911	14729	1	0.010816	0.038384	0.848395	779	4
SEMA3E	6	0.91696	0.92041	0.999911	15630	1	0.01079	0.038307	0.848395	778	5
ZNF668	6	0.92824	0.92963	0.999911	15794	1	0.011243	0.039687	0.848395	804	5
LCA5L	6	0.938	0.93821	0.999911	15967	1	0.011225	0.03964	0.848395	802	4
INPP5K	6	0.95747	0.95724	0.999911	16313	0	0.010999	0.038952	0.848395	788	4
KDM1A	6	0.96883	0.96867	0.999911	16559	0	0.011277	0.039773	0.848395	807	5
SWT1	6	0.97557	0.97543	0.999911	16705	0	0.011185	0.039514	0.848395	799	5
KCNG3	6	0.98007	0.97999	0.999911	16780	0	0.011178	0.039492	0.848395	798	4
SLC4A7	6	0.98022	0.98014	0.999911	16782	0	0.01089	0.038602	0.848395	782	5
CBLN2	6	0.98393	0.98385	0.999911	16866	0	0.011277	0.039773	0.848395	808	4
KRTAP19-1	2	0.9887	0.98865	0.999911	16980	0	0.011295	0.039819	0.848395	809	2
KIAA1586	2	0.98901	0.98895	0.999911	16985	0	0.010993	0.03893	0.848395	787	2
ARID4A	4	0.041455	0.12096	0.924128	2254	1	0.01138	0.040079	0.848937	813	3
RHBDD3	6	0.8467	0.87481	0.999911	14785	1	0.011345	0.039976	0.848937	811	3
KATNA1	6	0.95001	0.94989	0.999911	16183	0	0.011342	0.039961	0.848937	810	5
FERMT2	6	0.95486	0.9547	0.999911	16262	0	0.011376	0.040064	0.848937	812	4
LRP5	6	0.98526	0.98517	0.999911	16895	0	0.011384	0.04009	0.848937	814	5
RELN	6	0.33904	0.52723	0.999911	8766	2	0.011411	0.040164	0.84945	815	4
CYP1A2	6	0.30961	0.49746	0.999911	8266	1	0.011463	0.04034	0.851976	816	5
SLC5A11	6	0.62961	0.74645	0.999911	12511	1	0.011476	0.040382	0.851976	817	3
PNLIPRP3	6	0.27874	0.46511	0.999911	7762	3	0.011605	0.04079	0.852463	823	3
PRMT8	6	0.35971	0.54738	0.999911	9094	3	0.011563	0.040658	0.852463	820	2
NACC1	6	0.46963	0.64024	0.999911	10638	2	0.011541	0.040581	0.852463	819	4
AADACL4	6	0.68637	0.78473	0.999911	13192	1	0.011583	0.040723	0.852463	822	4
TBC1D15	6	0.81914	0.8602	0.999911	14497	1	0.011513	0.040493	0.852463	818	4
ZC3H12C	6	0.98648	0.9864	0.999911	16932	0	0.01157	0.040684	0.852463	821	5
BPIFC	6	0.99457	0.99457	0.999911	17121	0	0.011606	0.040801	0.852463	825	4
GPR50	6	0.99662	0.99665	0.999911	17161	0	0.011606	0.040794	0.852463	824	5
PANX1	6	0.070008	0.17822	0.966062	3179	3	0.011671	0.040985	0.855279	826	3
PLAU	6	0.90504	0.91132	0.999911	15468	1	0.011714	0.041117	0.855951	828	4
COL4A3BP	6	0.9292	0.93045	0.999911	15809	1	0.011702	0.041082	0.855951	827	3
CSPG5	6	0.086452	0.20847	0.97582	3680	2	0.012043	0.042124	0.855985	846	4
MAMSTR	6	0.09008	0.21496	0.976168	3789	1	0.011849	0.041543	0.855985	833	5
EMILIN2	6	0.12386	0.27353	0.986797	4778	1	0.012067	0.042195	0.855985	849	4
CHRNB1	6	0.1608	0.33391	0.999911	5685	2	0.011953	0.041852	0.855985	842	4
PROSER1	6	0.20243	0.38097	0.999911	6430	1	0.011865	0.041595	0.855985	835	5
EIF2AK4	6	0.23171	0.41363	0.999911	6926	2	0.012137	0.042394	0.855985	853	4
LPL	6	0.23883	0.42166	0.999911	7052	2	0.011848	0.041542	0.855985	832	4
CDC25C	6	0.25976	0.44467	0.999911	7410	2	0.011937	0.041803	0.855985	839	3
CHRNA2	6	0.30035	0.488	0.999911	8104	1	0.012054	0.042157	0.855985	847	5
TBX18	6	0.37682	0.56393	0.999911	9365	1	0.011801	0.041383	0.855985	830	2
AAED1	3	0.38427	0.57119	0.999911	9473	1	0.012129	0.042377	0.855985	851	2
C1orf65	6	0.40779	0.59391	0.999911	9863	1	0.012061	0.042182	0.855985	848	2
KISS1	2	0.42221	0.60776	0.999911	10099	1	0.011737	0.041195	0.855985	829	1
RBFOX2	6	0.45271	0.62912	0.999911	10453	1	0.012191	0.042553	0.855985	856	3
NR2C1	6	0.48795	0.6524	0.999911	10877	1	0.01213	0.042383	0.855985	852	5
CBLB	6	0.59223	0.72069	0.999911	12050	1	0.011904	0.041698	0.855985	837	5
GPI	6	0.63119	0.74754	0.999911	12534	2	0.011851	0.04155	0.855985	834	3
TMEM219	6	0.64137	0.75448	0.999911	12657	1	0.011966	0.041893	0.855985	843	4
ARRDC4	6	0.64332	0.75575	0.999911	12690	1	0.012096	0.042283	0.855985	850	5
GSG1	6	0.67437	0.77664	0.999911	13042	2	0.011942	0.041824	0.855985	840	3
DLL4	6	0.83328	0.86752	0.999911	14627	1	0.012186	0.042543	0.855985	855	4
EBLN1	4	0.83522	0.86856	0.999911	14654	1	0.01195	0.041843	0.855985	841	3
FILIP1	6	0.88869	0.90006	0.999911	15238	1	0.011988	0.041964	0.855985	845	3
KHDRBS1	6	0.93843	0.93861	0.999911	15975	1	0.011926	0.041774	0.855985	838	5
CST9	4	0.98783	0.98775	0.999911	16959	0	0.012169	0.042503	0.855985	854	4
KCTD11	4	0.9881	0.98804	0.999911	16965	0	0.011901	0.041689	0.855985	836	4
PLCB1	6	0.98832	0.98827	0.999911	16972	0	0.012193	0.042558	0.855985	857	5
PNCK	6	0.99229	0.99225	0.999911	17064	0	0.011819	0.041443	0.855985	831	5
MYO5C	6	0.99361	0.99357	0.999911	17093	0	0.011979	0.041938	0.855985	844	4
CPNE3	6	0.019443	0.064362	0.865372	1278	2	0.012475	0.043429	0.858494	871	4
LGMN	6	0.074729	0.18715	0.96654	3320	4	0.012377	0.043114	0.858494	863	2
HS3ST4	6	0.083742	0.2035	0.972561	3605	2	0.012348	0.043039	0.858494	862	3
PPP2R5C	6	0.17523	0.35032	0.999911	5928	1	0.01228	0.042829	0.858494	859	4
LRBA	6	0.21255	0.39233	0.999911	6610	1	0.012453	0.043354	0.858494	868	4
ETNK2	6	0.28253	0.46921	0.999911	7830	3	0.012516	0.043549	0.858494	873	3
AP4E1	6	0.28414	0.47097	0.999911	7855	1	0.012386	0.043139	0.858494	864	4
CST9L	3	0.31088	0.49874	0.999911	8287	1	0.012398	0.043174	0.858494	865	2
ENTPD7	6	0.31298	0.50095	0.999911	8317	2	0.012576	0.043729	0.858494	878	4
GPR114	6	0.5773	0.71083	0.999911	11880	2	0.012451	0.043349	0.858494	867	3
DFNA5	6	0.58735	0.71745	0.999911	11993	1	0.012472	0.043421	0.858494	870	4
TJAP1	6	0.61382	0.73552	0.999911	12307	2	0.012321	0.042955	0.858494	860	2
MAMLD1	6	0.77433	0.83897	0.999911	14122	1	0.012573	0.043722	0.858494	877	4
PBRM1	6	0.82712	0.86432	0.999911	14570	1	0.012467	0.043401	0.858494	869	5
GP5	6	0.89369	0.90344	0.999911	15304	1	0.012491	0.043473	0.858494	872	5
HNRNPAB	6	0.93557	0.93606	0.999911	15926	1	0.012256	0.042748	0.858494	858	2
TRIM4	4	0.98435	0.98425	0.999911	16876	0	0.0124	0.043181	0.858494	866	4
TXNRD3	3	0.98744	0.98736	0.999911	16951	0	0.01256	0.043688	0.858494	876	3
GNG2	3	0.98747	0.9874	0.999911	16952	0	0.01253	0.043591	0.858494	874	3
TLR10	3	0.98767	0.98759	0.999911	16955	0	0.012333	0.042989	0.858494	861	3
C17orf72	6	0.99151	0.9915	0.999911	17046	0	0.01256	0.043688	0.858494	875	5
NAPEPLD	6	0.96617	0.96598	0.999911	16507	0	0.012597	0.043792	0.858756	879	5
IGFBP1	6	0.0080869	0.030152	0.768843	676	2	0.012971	0.044961	0.859032	894	4
ACSS1	6	0.041986	0.1221	0.926359	2272	1	0.012812	0.044451	0.859032	888	3
CNOT10	6	0.060848	0.16051	0.953702	2901	3	0.013037	0.045167	0.859032	900	2
OR10Q1	4	0.08284	0.20185	0.97112	3581	1	0.013209	0.045708	0.859032	916	2
PDGFA	6	0.094202	0.2222	0.976168	3921	2	0.013207	0.0457	0.859032	915	4
GOSR1	6	0.11603	0.26032	0.984019	4555	2	0.013022	0.045118	0.859032	898	4
TMEM212	5	0.19147	0.36874	0.999911	6223	1	0.013242	0.045799	0.859032	918	4
SV2B	6	0.22236	0.4032	0.999911	6768	2	0.012912	0.044769	0.859032	890	4
FOXN3	6	0.23904	0.42188	0.999911	7060	3	0.012789	0.044384	0.859032	886	3
F11	6	0.24191	0.4251	0.999911	7110	1	0.013171	0.04558	0.859032	910	5
CX3CR1	6	0.41296	0.5989	0.999911	9949	2	0.012692	0.044077	0.859032	882	4
OR52A1	3	0.44976	0.62717	0.999911	10415	1	0.013132	0.045461	0.859032	907	2
OCRL	6	0.54733	0.69111	0.999911	11529	1	0.013194	0.045652	0.859032	913	3
HGS	6	0.55004	0.69288	0.999911	11563	1	0.012774	0.044342	0.859032	883	5
TMEM136	6	0.57691	0.71058	0.999911	11873	1	0.013234	0.045772	0.859032	917	4
CLTCL1	6	0.63121	0.74755	0.999911	12535	1	0.013243	0.0458	0.859032	919	3
OR8B4	2	0.65304	0.76228	0.999911	12793	0	0.013152	0.045515	0.859032	908	1
MIER3	5	0.66433	0.76989	0.999911	12919	1	0.013111	0.045401	0.859032	905	4
PRR5L	6	0.71931	0.80792	0.999911	13576	2	0.013166	0.045561	0.859032	909	3
PRKG1	6	0.807	0.8541	0.999911	14398	1	0.012975	0.044971	0.859032	895	4
MUTYH	6	0.81716	0.85918	0.999911	14486	1	0.013117	0.045417	0.859032	906	3
PRKAG2	6	0.84281	0.87265	0.999911	14739	1	0.012987	0.045011	0.859032	896	5
FDFT1	6	0.88136	0.89532	0.999911	15151	1	0.012943	0.044869	0.859032	892	5
ZIC4	6	0.88349	0.89665	0.999911	15179	1	0.012778	0.044354	0.859032	885	5
F2	6	0.88758	0.89931	0.999911	15219	1	0.013062	0.045245	0.859032	901	3
ZIM3	5	0.90643	0.91232	0.999911	15493	1	0.013034	0.045161	0.859032	899	4
FBXL17	6	0.91313	0.91732	0.999911	15578	1	0.012919	0.044794	0.859032	891	5
POU6F2	6	0.95719	0.95695	0.999911	16303	0	0.012669	0.044003	0.859032	881	5
ICMT	6	0.96294	0.9627	0.999911	16428	0	0.012776	0.044349	0.859032	884	4
PCYT1B	6	0.97831	0.97817	0.999911	16740	0	0.013019	0.04511	0.859032	897	5
ADAM9	6	0.98016	0.98008	0.999911	16781	0	0.012797	0.044414	0.859032	887	4
DSCR4	4	0.98601	0.98594	0.999911	16915	0	0.013105	0.045379	0.859032	904	4
WASF2	2	0.98681	0.98671	0.999911	16935	0	0.013194	0.045652	0.859032	914	2
OTOP1	3	0.98682	0.98672	0.999911	16936	0	0.013185	0.045622	0.859032	912	3
GPR160	1	0.98682	0.98672	0.999911	16937	0	0.013179	0.045604	0.859032	911	1
SLC39A5	6	0.98687	0.98678	0.999911	16938	0	0.012835	0.044521	0.859032	889	4
RRAGB	3	0.98691	0.98682	0.999911	16940	0	0.013093	0.045347	0.859032	903	3
SNX24	3	0.98704	0.98695	0.999911	16941	0	0.012958	0.044916	0.859032	893	3
PTPRQ	6	0.99419	0.99418	0.999911	17107	0	0.012656	0.043965	0.859032	880	4
SLC25A37	6	0.99584	0.99585	0.999911	17143	0	0.01308	0.0453	0.859032	902	5
MMGT1	5	0.55175	0.69399	0.999911	11577	1	0.013298	0.045977	0.861424	920	4
RAB11B	5	0.97218	0.97204	0.999911	16623	0	0.013317	0.046038	0.861628	921	4
HPGD	6	0.27663	0.46283	0.999911	7720	3	0.013361	0.046177	0.863292	922	3
METTL21A	6	0.11661	0.26132	0.984125	4577	3	0.013386	0.046244	0.863612	923	3
STYXL1	6	0.012272	0.043066	0.82181	903	2	0.013531	0.046698	0.863654	932	3
NR5A2	6	0.39239	0.57903	0.999911	9602	2	0.013474	0.046524	0.863654	928	4
RHCE	2	0.4355	0.61787	0.999911	10263	1	0.013467	0.046501	0.863654	927	1
NDUFAF5	6	0.70796	0.79974	0.999911	13450	2	0.013502	0.046605	0.863654	930	4
WIPI1	6	0.71099	0.80199	0.999911	13488	2	0.013444	0.046429	0.863654	926	4
CEACAM1	6	0.71237	0.80297	0.999911	13500	2	0.013491	0.046569	0.863654	929	3
KLHDC7A	6	0.86799	0.88714	0.999911	14993	1	0.013426	0.046371	0.863654	924	3
NOTUM	6	0.88027	0.89465	0.999911	15137	1	0.013522	0.046672	0.863654	931	4
CHRAC1	4	0.98657	0.98648	0.999911	16933	0	0.013427	0.046372	0.863654	925	4
CBFB	6	0.079522	0.19594	0.96654	3491	2	0.013751	0.047368	0.864088	940	3
KIF1A	6	0.10396	0.23938	0.98271	4194	3	0.013695	0.047208	0.864088	936	3
FAF1	6	0.20694	0.38607	0.999911	6506	2	0.013849	0.047673	0.864088	951	4
QSOX1	6	0.24429	0.4277	0.999911	7151	3	0.013585	0.046853	0.864088	934	3
PARD6A	6	0.33045	0.51863	0.999911	8632	3	0.013816	0.047573	0.864088	948	2
PRKAB2	6	0.36781	0.5552	0.999911	9227	3	0.013758	0.047395	0.864088	943	3
LANCL1	6	0.36956	0.55689	0.999911	9257	1	0.013846	0.047664	0.864088	950	4
CCDC60	6	0.44854	0.6264	0.999911	10402	2	0.013736	0.047328	0.864088	938	3
TSC22D3	6	0.80733	0.85427	0.999911	14403	1	0.013741	0.04734	0.864088	939	4
SESN1	6	0.85011	0.87669	0.999911	14818	1	0.01382	0.047589	0.864088	949	4
CLN5	6	0.8774	0.89291	0.999911	15103	1	0.013781	0.04747	0.864088	946	5
TVP23A	6	0.92818	0.92959	0.999911	15793	1	0.013758	0.047394	0.864088	942	5
UBE4A	6	0.96503	0.96485	0.999911	16484	0	0.013756	0.047387	0.864088	941	5
DHH	6	0.97122	0.97108	0.999911	16609	0	0.013703	0.047235	0.864088	937	5
SPOPL	2	0.97959	0.97951	0.999911	16771	0	0.013761	0.047405	0.864088	944	2
INO80E	6	0.97964	0.97956	0.999911	16772	0	0.013795	0.04751	0.864088	947	5
HRSP12	3	0.98624	0.98616	0.999911	16926	0	0.013761	0.047405	0.864088	945	3
ZNF747	6	0.99039	0.99036	0.999911	17021	0	0.013583	0.046846	0.864088	933	5
CALY	6	0.99366	0.99361	0.999911	17096	0	0.013676	0.047146	0.864088	935	5
SLC12A1	6	0.32639	0.5145	0.999911	8568	2	0.013886	0.047788	0.86526	952	4
SNAP25	6	0.026568	0.084331	0.878372	1654	2	0.013946	0.047958	0.865601	955	3
CA7	6	0.50212	0.66185	0.999911	11031	2	0.01393	0.047909	0.865601	953	4
FCHSD2	6	0.96045	0.9602	0.999911	16372	0	0.013934	0.04792	0.865601	954	4
EEF1D	5	0.372	0.55927	0.999911	9292	1	0.013965	0.048015	0.86572	956	2
DIO1	6	0.44548	0.62436	0.999911	10375	1	0.014004	0.048134	0.866068	958	4
LACE1	6	0.96186	0.9616	0.999911	16395	0	0.013992	0.048095	0.866068	957	5
HHLA3	4	0.64941	0.75985	0.999911	12743	1	0.014057	0.048312	0.866553	961	3
TMEM14A	3	0.83525	0.86858	0.999911	14656	0	0.01404	0.048256	0.866553	959	2
PKNOX1	6	0.98288	0.98278	0.999911	16835	0	0.014047	0.048279	0.866553	960	5
R3HCC1L	6	0.22044	0.4011	0.999911	6739	1	0.014148	0.048622	0.86718	964	4
PDX1	6	0.23221	0.41419	0.999911	6933	3	0.014141	0.048593	0.86718	963	3
STAMBPL1	6	0.6909	0.78778	0.999911	13238	2	0.014157	0.048649	0.86718	966	3
KDM4D	5	0.86189	0.88343	0.999911	14936	1	0.014168	0.048686	0.86718	967	4
UBXN4	6	0.91284	0.9171	0.999911	15571	1	0.014176	0.048699	0.86718	968	5
C1orf159	6	0.93419	0.9348	0.999911	15901	1	0.014135	0.048578	0.86718	962	5
TRPS1	6	0.99322	0.99317	0.999911	17084	0	0.014153	0.048638	0.86718	965	5
WBP2	6	0.64614	0.75764	0.999911	12713	2	0.014206	0.048793	0.86775	969	4
SPDYE3	2	0.95929	0.95908	0.999911	16343	0	0.014218	0.048832	0.86775	970	2
MYO18B	6	0.038378	0.11439	0.917114	2146	3	0.014997	0.051171	0.868234	1010	3
ISX	6	0.068184	0.17469	0.964202	3113	4	0.014465	0.04961	0.868234	978	1
SCGB1C1	4	0.078273	0.19365	0.96654	3445	2	0.014875	0.050819	0.868234	1005	1
GLRA1	6	0.09099	0.21656	0.976168	3816	2	0.014893	0.050874	0.868234	1006	4
OR4D6	5	0.094695	0.22309	0.976855	3936	1	0.015024	0.051243	0.868234	1015	4
NPAS2	6	0.15889	0.33098	0.999911	5637	4	0.0144	0.049417	0.868234	976	2
C10orf91	5	0.16432	0.33798	0.999911	5754	3	0.015048	0.051323	0.868234	1018	1
MPP5	6	0.20014	0.3784	0.999911	6382	2	0.014595	0.049986	0.868234	987	3
ANKRD28	6	0.22118	0.40196	0.999911	6751	1	0.014578	0.049935	0.868234	986	4
CNIH4	5	0.26405	0.4493	0.999911	7497	1	0.014297	0.049103	0.868234	972	3
PKP1	6	0.27876	0.46513	0.999911	7765	3	0.01453	0.049794	0.868234	981	2
NAGK	6	0.29599	0.48357	0.999911	8037	2	0.015	0.051177	0.868234	1011	3
RAB12	4	0.31236	0.50026	0.999911	8310	1	0.014528	0.049787	0.868234	980	2
ZG16	6	0.33748	0.52566	0.999911	8745	1	0.014862	0.050776	0.868234	1004	4
ZNF846	2	0.41943	0.60507	0.999911	10060	1	0.015065	0.051376	0.868234	1019	1
DENND3	6	0.44689	0.62531	0.999911	10390	2	0.01479	0.050575	0.868234	994	3
OCSTAMP	6	0.45418	0.6301	0.999911	10468	2	0.015044	0.051311	0.868234	1016	3
TMEM145	6	0.48723	0.65192	0.999911	10866	1	0.014819	0.050662	0.868234	997	4
PRG2	6	0.50539	0.66395	0.999911	11063	2	0.014676	0.050228	0.868234	990	3
ASXL1	6	0.52084	0.6738	0.999911	11243	1	0.014806	0.050624	0.868234	996	5
SPG7	6	0.54744	0.69119	0.999911	11531	2	0.014424	0.049484	0.868234	977	4
ZNF584	6	0.55041	0.69312	0.999911	11565	1	0.01466	0.050176	0.868234	988	2
OR13A1	6	0.56442	0.70235	0.999911	11714	1	0.014838	0.050711	0.868234	1000	4
ESPNL	6	0.57397	0.7086	0.999911	11832	2	0.014954	0.051054	0.868234	1009	4
FMO2	6	0.583	0.71458	0.999911	11950	2	0.014554	0.049851	0.868234	984	3
LHCGR	6	0.59564	0.72293	0.999911	12091	2	0.014664	0.050189	0.868234	989	3
GXYLT1	4	0.60086	0.72658	0.999911	12152	1	0.014937	0.051005	0.868234	1007	2
ORC6	6	0.61061	0.7333	0.999911	12272	2	0.014797	0.050603	0.868234	995	4
DEAF1	6	0.6173	0.73792	0.999911	12345	2	0.015018	0.051228	0.868234	1014	3
EFS	6	0.70952	0.80091	0.999911	13467	2	0.014335	0.049238	0.868234	975	3
HSD11B1	6	0.73066	0.81613	0.999911	13712	1	0.014478	0.049641	0.868234	979	4
CENPB	6	0.76621	0.83542	0.999911	14056	1	0.015016	0.051221	0.868234	1013	4
SRC	6	0.78834	0.84523	0.999911	14239	1	0.014837	0.050707	0.868234	998	5
ZNF436	5	0.78974	0.84589	0.999911	14250	1	0.014538	0.049812	0.868234	982	4
BNIP3L	6	0.80606	0.85363	0.999911	14389	1	0.014781	0.050541	0.868234	993	4
AK9	6	0.83703	0.86954	0.999911	14670	1	0.014855	0.050762	0.868234	1003	4
IREB2	6	0.88801	0.89961	0.999911	15229	1	0.015067	0.051378	0.868234	1020	4
TEX101	6	0.90201	0.90918	0.999911	15422	1	0.014253	0.048951	0.868234	971	4
UBE3C	6	0.92941	0.93063	0.999911	15810	1	0.015045	0.051312	0.868234	1017	5
SIAH1	5	0.94234	0.94231	0.999911	16037	0	0.014838	0.050709	0.868234	999	3
WWC3	6	0.95948	0.95926	0.999911	16352	0	0.014732	0.05038	0.868234	991	3
SERP2	4	0.96807	0.96793	0.999911	16545	0	0.014571	0.049912	0.868234	985	3
UHRF1BP1L	6	0.97182	0.97167	0.999911	16618	0	0.015003	0.051189	0.868234	1012	4
SNCA	1	0.98506	0.98496	0.999911	16893	0	0.014942	0.051022	0.868234	1008	1
ZNF260	2	0.98545	0.98538	0.999911	16901	0	0.014548	0.049833	0.868234	983	2
S100B	4	0.98568	0.98561	0.999911	16908	0	0.014322	0.049192	0.868234	974	4
TPD52L1	5	0.98991	0.98987	0.999911	17008	0	0.014842	0.050721	0.868234	1001	4
ZNF556	5	0.99005	0.99003	0.999911	17010	0	0.014748	0.050431	0.868234	992	4
KCNJ2	6	0.99101	0.99102	0.999911	17035	0	0.014853	0.050759	0.868234	1002	5
PLD1	6	0.99205	0.99202	0.999911	17059	0	0.01432	0.049187	0.868234	973	5
IL21R	6	0.4584	0.63286	0.999911	10510	2	0.015101	0.051475	0.868763	1021	2
SUSD5	6	0.96071	0.96047	0.999911	16378	0	0.015114	0.05151	0.868763	1022	3
NR3C2	6	0.069853	0.17793	0.966062	3171	1	0.015158	0.051641	0.869508	1023	3
ASB16	6	0.40503	0.59122	0.999911	9803	1	0.015165	0.051663	0.869508	1024	5
DNAJB2	6	0.89934	0.90731	0.999911	15387	1	0.015179	0.051706	0.869508	1025	4
MACROD2	6	0.90822	0.91363	0.999911	15516	1	0.015216	0.051806	0.869508	1027	3
MYEOV	6	0.97945	0.97938	0.999911	16763	0	0.015204	0.051766	0.869508	1026	4
CSMD1	6	0.98054	0.98046	0.999911	16789	0	0.015244	0.051893	0.870117	1028	4
TLR8	6	0.43105	0.6149	0.999911	10216	2	0.015335	0.052165	0.871254	1032	4
BRD8	6	0.68534	0.78406	0.999911	13177	1	0.015296	0.052044	0.871254	1029	5
DSE	5	0.68695	0.78513	0.999911	13198	1	0.015326	0.052133	0.871254	1031	4
GMPPA	6	0.87016	0.88846	0.999911	15020	1	0.015311	0.052089	0.871254	1030	4
SMLR1	2	0.98465	0.98457	0.999911	16882	0	0.015351	0.052214	0.871254	1033	2
NOTCH3	6	0.0059314	0.023166	0.742857	532	2	0.015374	0.052283	0.871273	1034	2
PFKP	6	0.032847	0.10149	0.90689	1929	3	0.015843	0.053645	0.871273	1056	3
FGFR3	6	0.15196	0.3201	0.999911	5480	1	0.015494	0.052646	0.871273	1038	5
TSPAN6	4	0.18181	0.35778	0.999911	6038	2	0.015524	0.052742	0.871273	1042	1
RAB11FIP3	6	0.21618	0.39632	0.999911	6658	2	0.015637	0.053077	0.871273	1045	4
TOX3	6	0.21631	0.39648	0.999911	6662	1	0.01585	0.053661	0.871273	1057	3
COPZ1	6	0.28034	0.46686	0.999911	7788	2	0.015957	0.053994	0.871273	1067	2
ARHGDIG	6	0.30587	0.49367	0.999911	8205	1	0.015882	0.053763	0.871273	1060	4
TMC3	6	0.36831	0.55568	0.999911	9237	1	0.015794	0.05352	0.871273	1053	4
ZNF157	5	0.40607	0.59222	0.999911	9822	1	0.015991	0.05409	0.871273	1069	4
TBK1	6	0.43393	0.61678	0.999911	10247	2	0.015828	0.053606	0.871273	1055	3
CHRNA6	6	0.47648	0.64476	0.999911	10727	1	0.015763	0.053434	0.871273	1051	3
C19orf59	6	0.50209	0.66184	0.999911	11030	1	0.015745	0.05339	0.871273	1050	4
NDRG3	5	0.53886	0.68553	0.999911	11435	1	0.015913	0.053851	0.871273	1063	3
RIPK2	6	0.54067	0.68671	0.999911	11458	2	0.015716	0.053304	0.871273	1047	4
SLC12A2	6	0.56366	0.70186	0.999911	11706	1	0.016005	0.054139	0.871273	1071	4
MARCH7	6	0.6475	0.75856	0.999911	12724	1	0.015969	0.054028	0.871273	1068	5
FAM180A	6	0.66506	0.77039	0.999911	12924	2	0.015804	0.053545	0.871273	1054	4
CSNK1A1L	4	0.75792	0.83185	0.999911	13996	1	0.01587	0.053728	0.871273	1059	3
FGF12	6	0.79291	0.84734	0.999911	14279	1	0.015448	0.052501	0.871273	1037	4
KCTD2	6	0.86641	0.88617	0.999911	14982	1	0.015524	0.052741	0.871273	1041	4
SLC27A2	6	0.88758	0.89931	0.999911	15220	1	0.01591	0.053845	0.871273	1062	5
ZNF836	2	0.90606	0.91207	0.999911	15488	0	0.015728	0.05334	0.871273	1048	2
TTC17	6	0.91849	0.92159	0.999911	15647	1	0.015946	0.053957	0.871273	1066	3
TRUB1	6	0.92832	0.9297	0.999911	15797	1	0.015638	0.053084	0.871273	1046	5
CDK17	5	0.93333	0.93405	0.999911	15879	0	0.015506	0.052679	0.871273	1040	4
GUCY2D	6	0.94024	0.94027	0.999911	16006	1	0.015883	0.053769	0.871273	1061	4
SPINT2	6	0.94957	0.94943	0.999911	16174	0	0.015439	0.052479	0.871273	1035	3
SLC17A1	6	0.96083	0.9606	0.999911	16379	0	0.015503	0.052673	0.871273	1039	3
SLC39A9	6	0.96965	0.96949	0.999911	16578	0	0.01592	0.053875	0.871273	1064	4
KIF22	6	0.98235	0.98224	0.999911	16821	0	0.015925	0.053893	0.871273	1065	4
ARL8B	1	0.98423	0.98414	0.999911	16873	0	0.015774	0.053467	0.871273	1052	1
CDC37L1	4	0.98426	0.98417	0.999911	16874	0	0.015741	0.05338	0.871273	1049	4
TMEM30A	5	0.98776	0.98768	0.999911	16957	0	0.016021	0.054186	0.871273	1072	4
IMPDH1	6	0.9894	0.98936	0.999911	16995	0	0.015565	0.052872	0.871273	1044	5
GOLGA1	6	0.9894	0.98936	0.999911	16996	0	0.015851	0.053664	0.871273	1058	5
TMEM187	6	0.9894	0.98936	0.999911	16994	0	0.016004	0.054133	0.871273	1070	5
LYRM1	5	0.9896	0.98957	0.999911	16998	0	0.015444	0.052492	0.871273	1036	4
PHOSPHO1	6	0.99637	0.99639	0.999911	17155	0	0.015549	0.052824	0.871273	1043	5
SRSF2	6	0.00058543	0.0027459	0.442815	106	4	0.017253	0.057875	0.871692	1143	1
C19orf12	4	0.0010201	0.0046461	0.502644	158	3	0.01652	0.055653	0.871692	1093	1
CERKL	6	0.0017399	0.0077611	0.589327	227	1	0.017523	0.058668	0.871692	1157	4
SLC25A29	6	0.039425	0.11658	0.918781	2185	4	0.016929	0.056893	0.871692	1120	2
CYB5R2	6	0.040849	0.11967	0.924128	2232	2	0.016331	0.05509	0.871692	1084	3
LARP4B	6	0.057554	0.15395	0.945056	2808	2	0.016333	0.055094	0.871692	1085	2
CHMP3	4	0.062183	0.1631	0.955421	2935	2	0.017103	0.05743	0.871692	1135	1
FKBP6	6	0.064036	0.16669	0.957597	3000	3	0.017188	0.057693	0.871692	1140	2
SYP	6	0.064645	0.16788	0.960047	3013	2	0.017097	0.057412	0.871692	1134	4
HERC4	6	0.072935	0.18372	0.96654	3270	4	0.01667	0.0561	0.871692	1103	2
C1QTNF7	6	0.078664	0.19438	0.96654	3461	2	0.017178	0.057659	0.871692	1139	3
OR6Q1	3	0.085273	0.20628	0.974754	3642	2	0.016872	0.056721	0.871692	1117	1
ASAH2	5	0.10092	0.23406	0.981869	4108	2	0.017155	0.0576	0.871692	1138	2
ARSH	6	0.13957	0.29988	0.992485	5202	1	0.016224	0.05477	0.871692	1080	3
PDIA6	6	0.14069	0.30169	0.992485	5235	3	0.016783	0.056454	0.871692	1112	3
C2orf16	6	0.19621	0.37412	0.999911	6315	1	0.017573	0.058801	0.871692	1162	5
SNX1	6	0.22198	0.4028	0.999911	6764	1	0.016779	0.056441	0.871692	1111	3
MMD	5	0.22874	0.41027	0.999911	6878	1	0.016669	0.056096	0.871692	1102	2
SLIT1	6	0.24566	0.42921	0.999911	7173	2	0.01663	0.055975	0.871692	1101	3
THADA	6	0.25454	0.439	0.999911	7324	2	0.016073	0.054345	0.871692	1074	4
TNFRSF1A	6	0.2764	0.46259	0.999911	7715	2	0.017059	0.057304	0.871692	1132	3
TGFBI	6	0.29993	0.48757	0.999911	8098	1	0.016817	0.05655	0.871692	1113	4
PLOD2	4	0.31176	0.49964	0.999911	8299	1	0.017471	0.058516	0.871692	1154	3
C1orf194	5	0.312	0.49989	0.999911	8306	1	0.016538	0.055709	0.871692	1094	4
DHX38	6	0.34303	0.53107	0.999911	8828	2	0.016749	0.05635	0.871692	1107	4
SLTM	6	0.34565	0.53365	0.999911	8862	2	0.016864	0.056698	0.871692	1116	4
GALNTL5	3	0.35726	0.54496	0.999911	9059	1	0.01749	0.058569	0.871692	1155	2
MUC17	6	0.35815	0.54586	0.999911	9068	2	0.016955	0.056978	0.871692	1125	4
NLRP12	6	0.36386	0.55139	0.999911	9161	2	0.017447	0.058454	0.871692	1152	3
DST	6	0.36928	0.55663	0.999911	9252	2	0.01612	0.054488	0.871692	1076	3
BPIFA1	6	0.40868	0.5948	0.999911	9882	1	0.016571	0.0558	0.871692	1097	4
DAPK1	6	0.41263	0.59858	0.999911	9944	2	0.017148	0.057568	0.871692	1137	3
NRIP1	5	0.42497	0.61037	0.999911	10145	1	0.016763	0.056393	0.871692	1108	4
GSTO2	6	0.45124	0.62813	0.999911	10433	2	0.016281	0.054947	0.871692	1083	4
NDST4	6	0.45412	0.63006	0.999911	10467	2	0.016476	0.055526	0.871692	1092	2
VSTM1	5	0.46628	0.63799	0.999911	10600	1	0.017121	0.057488	0.871692	1136	3
PBDC1	3	0.46959	0.6402	0.999911	10637	1	0.01671	0.056219	0.871692	1104	2
MINK1	6	0.48997	0.65371	0.999911	10898	1	0.01662	0.055952	0.871692	1099	4
CPVL	5	0.49634	0.65805	0.999911	10969	2	0.017317	0.058068	0.871692	1146	2
DNAJB8	6	0.51032	0.66706	0.999911	11109	1	0.016046	0.054268	0.871692	1073	5
SERPINE3	6	0.51492	0.67002	0.999911	11167	2	0.016265	0.054901	0.871692	1082	4
DENND4A	6	0.51934	0.67283	0.999911	11222	2	0.016949	0.056966	0.871692	1123	4
MRPS7	6	0.53596	0.68362	0.999911	11405	1	0.017057	0.057299	0.871692	1131	4
KRTAP13-1	3	0.58334	0.7148	0.999911	11957	1	0.016547	0.055739	0.871692	1096	2
ANGPTL7	6	0.59928	0.72548	0.999911	12136	2	0.016605	0.055905	0.871692	1098	4
IGSF10	6	0.60601	0.73013	0.999911	12207	2	0.016406	0.055322	0.871692	1090	4
IFI30	6	0.65021	0.76039	0.999911	12753	2	0.016739	0.05632	0.871692	1106	4
APOL3	6	0.67562	0.77749	0.999911	13059	1	0.016402	0.05531	0.871692	1089	5
ELOVL2	5	0.68604	0.78454	0.999911	13188	1	0.016623	0.055964	0.871692	1100	4
TAS1R1	6	0.68892	0.78643	0.999911	13218	2	0.016863	0.056694	0.871692	1115	4
SUSD1	6	0.70715	0.79919	0.999911	13439	2	0.017527	0.058676	0.871692	1160	4
SELPLG	5	0.74437	0.82617	0.999911	13909	1	0.017302	0.058022	0.871692	1145	4
COL26A1	6	0.77931	0.84115	0.999911	14160	1	0.017568	0.058783	0.871692	1161	5
HOOK2	6	0.81783	0.85953	0.999911	14489	1	0.016165	0.054601	0.871692	1077	2
SNX33	6	0.83502	0.86845	0.999911	14652	1	0.017577	0.058814	0.871692	1163	4
GPR141	5	0.85223	0.87789	0.999911	14842	1	0.017089	0.057392	0.871692	1133	4
HIRIP3	6	0.85292	0.87828	0.999911	14847	1	0.016541	0.055717	0.871692	1095	5
ZBTB6	3	0.86887	0.88766	0.999911	15002	0	0.016892	0.056775	0.871692	1118	2
BBS12	3	0.87133	0.88918	0.999911	15030	0	0.016969	0.057023	0.871692	1127	1
ARL13A	3	0.89341	0.90324	0.999911	15297	0	0.017392	0.058292	0.871692	1150	2
FPR2	4	0.91895	0.92195	0.999911	15659	0	0.017033	0.057217	0.871692	1130	3
SEC23B	6	0.92402	0.92612	0.999911	15727	1	0.016475	0.055524	0.871692	1091	5
TRPM4	6	0.92814	0.92956	0.999911	15792	1	0.017464	0.0585	0.871692	1153	3
KCNH8	6	0.9396	0.93968	0.999911	15993	1	0.016952	0.056973	0.871692	1124	4
KRT39	6	0.94531	0.94519	0.999911	16097	1	0.016764	0.056396	0.871692	1109	5
CASR	6	0.94649	0.94635	0.999911	16119	1	0.016226	0.054778	0.871692	1081	5
KLHDC3	6	0.96429	0.96409	0.999911	16471	0	0.016106	0.054446	0.871692	1075	5
PTGR1	4	0.96707	0.96689	0.999911	16525	0	0.017341	0.05814	0.871692	1148	3
CHRM1	6	0.9691	0.96895	0.999911	16567	0	0.016943	0.056947	0.871692	1122	5
SPINK5	6	0.97051	0.97033	0.999911	16597	0	0.016992	0.057095	0.871692	1128	5
GJB7	2	0.97163	0.97149	0.999911	16616	0	0.017281	0.057959	0.871692	1144	2
ZFP91	6	0.97538	0.97522	0.999911	16701	0	0.016777	0.056434	0.871692	1110	5
ZNF552	5	0.97622	0.97607	0.999911	16716	0	0.016185	0.054658	0.871692	1078	4
CXorf56	1	0.98247	0.98235	0.999911	16825	0	0.017526	0.058674	0.871692	1159	1
TNP1	3	0.98247	0.98235	0.999911	16826	0	0.017526	0.058672	0.871692	1158	3
CTAG2	2	0.98275	0.98264	0.999911	16833	0	0.017249	0.05786	0.871692	1142	2
UBE3A	2	0.98303	0.98294	0.999911	16839	0	0.016967	0.057014	0.871692	1126	2
RAB30	2	0.98307	0.98298	0.999911	16841	0	0.016925	0.056879	0.871692	1119	2
FGFR1OP	4	0.98307	0.98298	0.999911	16840	0	0.016932	0.056908	0.871692	1121	4
LACC1	4	0.98315	0.98307	0.999911	16842	0	0.016853	0.056667	0.871692	1114	4
TMLHE	3	0.98365	0.98356	0.999911	16854	0	0.016354	0.055157	0.871692	1086	3
PACSIN3	6	0.98472	0.98464	0.999911	16886	0	0.017512	0.058631	0.871692	1156	4
SYNE2	6	0.98565	0.98557	0.999911	16906	0	0.016736	0.056308	0.871692	1105	4
NOX4	6	0.98915	0.98911	0.999911	16988	0	0.016396	0.055292	0.871692	1087	5
ST8SIA1	6	0.98976	0.98972	0.999911	17004	0	0.017443	0.058446	0.871692	1151	5
LRFN2	6	0.98979	0.98975	0.999911	17006	0	0.016398	0.055296	0.871692	1088	5
ACBD4	6	0.99141	0.9914	0.999911	17042	0	0.017032	0.057214	0.871692	1129	4
ARMC9	6	0.9934	0.99336	0.999911	17088	0	0.017317	0.058068	0.871692	1147	4
PPAPDC1A	6	0.99409	0.99408	0.999911	17105	0	0.017383	0.058266	0.871692	1149	4
MED13	6	0.99591	0.99593	0.999911	17144	0	0.017233	0.057819	0.871692	1141	5
APC2	6	0.99621	0.99623	0.999911	17153	0	0.016219	0.054758	0.871692	1079	5
PDZD2	6	0.66379	0.76953	0.999911	12909	2	0.017595	0.058868	0.871742	1164	4
TTLL9	6	0.73873	0.822	0.999911	13819	1	0.017624	0.058942	0.87209	1165	5
PACRG	6	0.66172	0.76813	0.999911	12883	1	0.017648	0.059002	0.872234	1166	5
MED13L	6	0.65148	0.76124	0.999911	12771	2	0.017692	0.059129	0.872614	1168	4
SLC15A5	6	0.69415	0.79012	0.999911	13273	2	0.017678	0.059086	0.872614	1167	3
NPSR1	6	0.061471	0.16172	0.955421	2915	1	0.0179	0.059745	0.873641	1176	2
ACY1	6	0.11324	0.25547	0.982965	4477	3	0.017888	0.059715	0.873641	1175	3
MBP	6	0.15305	0.32183	0.999911	5511	1	0.017994	0.06001	0.873641	1184	4
CKAP2	5	0.17696	0.35232	0.999911	5960	1	0.017836	0.059563	0.873641	1171	4
SLC38A11	6	0.20279	0.38137	0.999911	6436	2	0.017952	0.059892	0.873641	1180	3
CNOT1	6	0.21461	0.3946	0.999911	6641	2	0.017771	0.059376	0.873641	1169	2
ZNF829	4	0.43612	0.61827	0.999911	10269	1	0.017946	0.059876	0.873641	1179	3
NRG2	6	0.47897	0.64638	0.999911	10761	1	0.017937	0.059846	0.873641	1178	5
KCNJ15	5	0.50774	0.66543	0.999911	11084	1	0.017857	0.059626	0.873641	1173	3
STXBP3	4	0.72528	0.81223	0.999911	13653	1	0.017827	0.059528	0.873641	1170	3
LAX1	6	0.74231	0.82464	0.999911	13878	1	0.017979	0.059972	0.873641	1183	5
C3	6	0.76097	0.83315	0.999911	14018	1	0.017965	0.059933	0.873641	1182	4
RFPL4B	5	0.9538	0.95362	0.999911	16251	0	0.017875	0.059673	0.873641	1174	4
TM4SF18	2	0.98215	0.98204	0.999911	16817	0	0.017846	0.059598	0.873641	1172	2
SLC24A1	6	0.98633	0.98626	0.999911	16929	0	0.017929	0.059819	0.873641	1177	5
OR11L1	5	0.99197	0.99193	0.999911	17057	0	0.017955	0.059902	0.873641	1181	4
TBC1D24	6	0.36853	0.5559	0.999911	9242	2	0.018014	0.060077	0.873873	1185	3
ZFPL1	6	0.046668	0.13184	0.932898	2429	1	0.018066	0.060241	0.875532	1186	5
SP5	6	0.98643	0.98635	0.999911	16931	0	0.018122	0.060395	0.877022	1187	4
SHISA2	6	0.38355	0.57047	0.999911	9458	1	0.018174	0.060536	0.877612	1188	5
ZCCHC14	6	0.92235	0.92473	0.999911	15709	1	0.018224	0.060676	0.877612	1191	3
ATP13A5	6	0.97245	0.97229	0.999911	16630	0	0.018196	0.060601	0.877612	1189	5
CYR61	6	0.97966	0.97957	0.999911	16773	0	0.018216	0.060653	0.877612	1190	5
PPIB	6	0.98373	0.98364	0.999911	16856	0	0.01823	0.06069	0.877612	1192	4
CNNM2	6	0.19043	0.36754	0.999911	6200	2	0.018317	0.06095	0.877693	1197	3
TMX3	5	0.27796	0.4643	0.999911	7746	1	0.018271	0.060808	0.877693	1193	4
KIAA1958	6	0.32246	0.51044	0.999911	8480	2	0.018286	0.060849	0.877693	1194	3
NYAP2	6	0.40204	0.58835	0.999911	9757	1	0.018306	0.06092	0.877693	1195	5
RNF38	6	0.41778	0.60352	0.999911	10030	1	0.018307	0.06092	0.877693	1196	5
HMBOX1	6	0.54403	0.68888	0.999911	11498	1	0.018353	0.061054	0.877716	1199	3
APPL2	6	0.86034	0.88256	0.999911	14924	1	0.018347	0.061035	0.877716	1198	3
ASCL5	6	0.1861	0.36262	0.999911	6115	3	0.018418	0.061253	0.877987	1200	2
ELOVL7	6	0.29043	0.47772	0.999911	7950	1	0.018547	0.06163	0.877987	1206	4
GRM4	6	0.34138	0.52951	0.999911	8809	3	0.018548	0.061632	0.877987	1207	3
CTXN3	4	0.73963	0.82264	0.999911	13834	1	0.018463	0.061397	0.877987	1202	3
DOC2A	6	0.79931	0.85035	0.999911	14334	1	0.018484	0.061457	0.877987	1203	5
FLYWCH1	6	0.86684	0.88643	0.999911	14986	1	0.018557	0.061669	0.877987	1210	4
FAM120C	6	0.96262	0.96236	0.999911	16417	0	0.018548	0.061633	0.877987	1208	5
SHCBP1	6	0.96339	0.96319	0.999911	16437	0	0.018556	0.061667	0.877987	1209	5
FZD1	6	0.96622	0.96602	0.999911	16508	0	0.018514	0.061541	0.877987	1205	5
ZNF414	6	0.97927	0.97919	0.999911	16758	0	0.018504	0.06152	0.877987	1204	4
MIOS	6	0.98878	0.98873	0.999911	16982	0	0.018562	0.061684	0.877987	1211	4
ERI3	6	0.98906	0.98901	0.999911	16986	0	0.018428	0.061287	0.877987	1201	5
GNA15	6	0.31202	0.49991	0.999911	8307	1	0.018609	0.061822	0.878737	1212	5
HRH4	5	0.73082	0.81624	0.999911	13714	1	0.018635	0.061889	0.878737	1214	4
SCNN1B	6	0.98721	0.98712	0.999911	16945	0	0.018622	0.061853	0.878737	1213	5
GHDC	6	0.060162	0.15912	0.952466	2873	2	0.018684	0.062033	0.880051	1215	4
SLC22A5	6	0.64956	0.75996	0.999911	12745	1	0.018747	0.062239	0.880071	1219	4
LECT2	6	0.72315	0.81066	0.999911	13633	1	0.018738	0.062202	0.880071	1217	4
JAM3	6	0.85019	0.87673	0.999911	14819	1	0.018745	0.062235	0.880071	1218	3
SLC25A24	6	0.91969	0.92256	0.999911	15672	1	0.018706	0.062092	0.880071	1216	4
RAB3GAP2	6	0.85966	0.88215	0.999911	14918	1	0.018766	0.062291	0.880088	1220	4
ZC3H12D	6	0.016156	0.054798	0.849476	1110	3	0.018806	0.062404	0.880965	1221	3
ETFDH	6	0.96988	0.96972	0.999911	16581	0	0.018828	0.062471	0.881192	1222	4
BTBD1	6	0.48374	0.64958	0.999911	10817	2	0.018882	0.062619	0.881451	1224	4
RBM15	6	0.92046	0.92319	0.999911	15681	1	0.01889	0.062643	0.881451	1225	5
MYCT1	5	0.99106	0.99106	0.999911	17036	0	0.018854	0.062557	0.881451	1223	4
EBNA1BP2	6	0.55522	0.69628	0.999911	11612	1	0.018924	0.062739	0.882089	1226	5
SPTA1	6	0.85753	0.88093	0.999911	14899	1	0.018963	0.062852	0.882232	1228	5
RAB2A	6	0.97815	0.97799	0.999911	16736	0	0.018955	0.062827	0.882232	1227	5
TTC21B	6	0.40099	0.58738	0.999911	9740	2	0.01904	0.063058	0.883688	1230	4
C12orf5	6	0.97896	0.97884	0.999911	16750	0	0.019035	0.06304	0.883688	1229	4
RNF220	6	0.029877	0.093474	0.89807	1792	1	0.01913	0.063306	0.884591	1232	3
ETV5	6	0.15807	0.32966	0.999911	5617	1	0.019131	0.063312	0.884591	1233	4
GLRX2	2	0.1977	0.37573	0.999911	6336	1	0.019213	0.06355	0.884591	1237	1
MYO1E	6	0.19829	0.37638	0.999911	6347	1	0.01924	0.063625	0.884591	1238	5
TACR1	6	0.24202	0.42521	0.999911	7112	2	0.019262	0.063687	0.884591	1241	4
LHX4	6	0.32498	0.51304	0.999911	8545	3	0.019259	0.063679	0.884591	1240	1
PPFIA1	6	0.54173	0.68739	0.999911	11472	2	0.019115	0.063263	0.884591	1231	3
ASPA	6	0.58246	0.71425	0.999911	11942	1	0.019177	0.063434	0.884591	1235	5
CAT	6	0.68308	0.78251	0.999911	13158	1	0.019252	0.063656	0.884591	1239	3
SOCS1	5	0.86867	0.88754	0.999911	14999	1	0.019146	0.063356	0.884591	1234	4
TRPV4	6	0.99115	0.99115	0.999911	17038	0	0.019198	0.063507	0.884591	1236	5
IPCEF1	6	0.57453	0.70897	0.999911	11837	1	0.019284	0.063742	0.884636	1242	3
CHST15	6	0.5474	0.69116	0.999911	11530	1	0.019321	0.063868	0.88506	1243	4
DDX43	6	0.96566	0.96548	0.999911	16496	0	0.019324	0.063875	0.88506	1244	3
MORC4	6	0.033655	0.10366	0.907325	1964	2	0.019698	0.064986	0.88676	1262	4
SLC29A3	6	0.038386	0.11441	0.917114	2147	2	0.019711	0.065028	0.88676	1264	3
SEPT8	6	0.045638	0.12966	0.929999	2400	4	0.019513	0.064447	0.88676	1250	2
PLEKHA4	6	0.10749	0.2455	0.982777	4295	1	0.019453	0.064269	0.88676	1248	2
TSHZ1	6	0.11766	0.26319	0.984268	4603	2	0.01968	0.064927	0.88676	1261	4
CD4	6	0.34507	0.53306	0.999911	8856	2	0.019568	0.064608	0.88676	1254	4
TMEM135	6	0.3647	0.5522	0.999911	9178	3	0.019636	0.064795	0.88676	1256	3
CREM	6	0.39373	0.58035	0.999911	9618	2	0.019443	0.064232	0.88676	1247	3
VPS13B	6	0.39925	0.58571	0.999911	9714	3	0.019388	0.064081	0.88676	1245	2
MSS51	6	0.40788	0.59399	0.999911	9865	1	0.01965	0.064833	0.88676	1259	3
ANXA11	6	0.61862	0.73886	0.999911	12356	2	0.019702	0.065	0.88676	1263	4
TREX2	6	0.62316	0.74196	0.999911	12419	1	0.019531	0.064497	0.88676	1252	5
PRDM5	6	0.67381	0.77625	0.999911	13032	2	0.019517	0.064458	0.88676	1251	2
CHRND	6	0.68958	0.78687	0.999911	13224	1	0.019661	0.064875	0.88676	1260	5
ARMC4	6	0.70045	0.79454	0.999911	13352	2	0.019476	0.064331	0.88676	1249	4
SNRK	6	0.79614	0.84886	0.999911	14306	1	0.019647	0.064826	0.88676	1258	4
THRAP3	6	0.84042	0.87136	0.999911	14706	1	0.019743	0.06513	0.88676	1266	5
CAPN14	6	0.84801	0.87552	0.999911	14797	1	0.019438	0.064211	0.88676	1246	5
NDUFAF7	6	0.96198	0.96171	0.999911	16402	0	0.019732	0.065095	0.88676	1265	3
PPIE	5	0.9775	0.97732	0.999911	16731	0	0.019531	0.064498	0.88676	1253	4
KHDC1	4	0.98035	0.98028	0.999911	16786	0	0.019645	0.064822	0.88676	1257	4
CUL7	6	0.99543	0.99546	0.999911	17138	0	0.019582	0.064653	0.88676	1255	5
ANKRD46	6	0.53933	0.68581	0.999911	11444	2	0.019776	0.065223	0.887334	1267	3
CBX2	6	0.21669	0.39691	0.999911	6673	3	0.019807	0.065317	0.887907	1268	2
PPP3R2	5	0.010993	0.039241	0.802847	838	3	0.019906	0.065619	0.888511	1273	1
ZNF830	6	0.26457	0.44988	0.999911	7509	3	0.019861	0.06548	0.888511	1269	3
ZBTB24	6	0.42594	0.61133	0.999911	10162	2	0.019905	0.065616	0.888511	1272	3
HPD	6	0.45743	0.63224	0.999911	10498	1	0.019878	0.065531	0.888511	1271	5
NR4A2	6	0.96862	0.96844	0.999911	16555	0	0.019872	0.065514	0.888511	1270	4
PHTF1	6	0.96423	0.96404	0.999911	16469	0	0.01999	0.065873	0.891248	1274	4
ZMYND15	6	0.091476	0.21741	0.976168	3830	3	0.020034	0.066003	0.891566	1275	2
FAM181B	5	0.29202	0.47943	0.999911	7980	2	0.020068	0.0661	0.891566	1277	2
BEND3	6	0.79899	0.8502	0.999911	14331	1	0.02007	0.066103	0.891566	1278	4
KIAA0895	6	0.86239	0.88371	0.999911	14942	1	0.020045	0.066031	0.891566	1276	3
MYH3	6	0.043343	0.1249	0.927357	2316	3	0.020973	0.068712	0.891826	1322	3
WDR73	6	0.080626	0.19795	0.967985	3523	1	0.021357	0.069805	0.891826	1348	5
COL15A1	6	0.082929	0.20201	0.97112	3582	3	0.020099	0.066184	0.891826	1279	2
REEP3	6	0.1135	0.25589	0.982965	4485	3	0.020523	0.067413	0.891826	1302	3
PPP1R3D	6	0.13783	0.29694	0.992485	5154	4	0.020422	0.067134	0.891826	1297	2
HHLA1	6	0.14871	0.31491	0.999911	5402	2	0.021068	0.068978	0.891826	1329	4
UGCG	6	0.1938	0.37137	0.999911	6259	1	0.021332	0.069731	0.891826	1346	3
EMR3	6	0.23456	0.41684	0.999911	6975	3	0.020506	0.06737	0.891826	1301	3
BARX1	6	0.23862	0.42143	0.999911	7051	1	0.021206	0.069366	0.891826	1337	4
PTK2B	6	0.29603	0.48361	0.999911	8038	2	0.020377	0.066992	0.891826	1293	4
MSC	6	0.30097	0.48863	0.999911	8117	3	0.02126	0.069534	0.891826	1341	2
IL17A	4	0.30215	0.48986	0.999911	8140	2	0.020709	0.067951	0.891826	1311	1
OAT	3	0.31476	0.50277	0.999911	8345	1	0.021146	0.069202	0.891826	1333	2
PLA2G15	6	0.32965	0.51782	0.999911	8622	2	0.020922	0.068564	0.891826	1319	3
SLC27A4	6	0.35068	0.53859	0.999911	8954	1	0.020825	0.068287	0.891826	1317	5
SZRD1	5	0.36255	0.55014	0.999911	9134	2	0.021264	0.06954	0.891826	1342	3
CCDC3	6	0.44429	0.62358	0.999911	10366	2	0.020359	0.066936	0.891826	1292	2
TLX2	6	0.4499	0.62726	0.999911	10418	2	0.020228	0.066564	0.891826	1285	2
RAI14	6	0.46499	0.63715	0.999911	10584	2	0.021127	0.069146	0.891826	1332	3
SEMA7A	6	0.4756	0.64418	0.999911	10713	1	0.020938	0.068615	0.891826	1320	2
CKLF	5	0.50723	0.66509	0.999911	11079	1	0.020582	0.067589	0.891826	1304	4
TRIP4	6	0.51308	0.66882	0.999911	11149	2	0.020293	0.066749	0.891826	1288	2
ARF5	4	0.52102	0.67391	0.999911	11246	1	0.021049	0.068925	0.891826	1328	3
LRP12	6	0.52386	0.67576	0.999911	11273	1	0.020307	0.066787	0.891826	1289	5
EPS15L1	6	0.59702	0.72387	0.999911	12107	2	0.021045	0.068914	0.891826	1327	4
ELAVL1	6	0.60417	0.72888	0.999911	12191	1	0.020837	0.068316	0.891826	1318	5
SLC17A8	6	0.61843	0.73873	0.999911	12353	2	0.021086	0.069027	0.891826	1331	4
C12orf74	6	0.66943	0.77329	0.999911	12976	2	0.020413	0.067107	0.891826	1295	2
FAM173A	6	0.68227	0.78196	0.999911	13148	2	0.020809	0.068246	0.891826	1316	2
MATR3	6	0.69547	0.79103	0.999911	13288	2	0.02124	0.069477	0.891826	1340	4
AKT3	6	0.73212	0.81718	0.999911	13740	2	0.02012	0.066255	0.891826	1280	2
AIRE	6	0.74411	0.82598	0.999911	13907	2	0.020164	0.066382	0.891826	1282	3
CYB5RL	6	0.74619	0.82701	0.999911	13921	1	0.020615	0.067695	0.891826	1306	4
MRFAP1L1	4	0.75517	0.83074	0.999911	13982	1	0.020331	0.066856	0.891826	1291	3
IDH2	6	0.76166	0.83344	0.999911	14024	1	0.020739	0.068032	0.891826	1313	4
QRFPR	6	0.77341	0.83856	0.999911	14116	1	0.021192	0.069326	0.891826	1335	5
CPXM1	6	0.77464	0.8391	0.999911	14123	1	0.020995	0.068776	0.891826	1325	4
ARRB1	6	0.77904	0.84103	0.999911	14157	1	0.020794	0.068196	0.891826	1314	5
CDYL2	6	0.79042	0.84618	0.999911	14253	1	0.020546	0.067478	0.891826	1303	5
TMEM245	6	0.80623	0.85371	0.999911	14391	1	0.020993	0.06877	0.891826	1324	5
KCNU1	6	0.80957	0.85534	0.999911	14417	1	0.021072	0.068985	0.891826	1330	4
NLRC3	6	0.83433	0.86809	0.999911	14642	1	0.020487	0.06731	0.891826	1299	4
ME3	6	0.87193	0.88954	0.999911	15035	1	0.020184	0.066437	0.891826	1284	4
CAMK2N2	6	0.87214	0.88968	0.999911	15037	1	0.020737	0.068026	0.891826	1312	5
SNAI2	6	0.89049	0.9012	0.999911	15265	1	0.020604	0.067656	0.891826	1305	4
UNC50	5	0.89143	0.90188	0.999911	15273	1	0.02066	0.067811	0.891826	1308	3
ANXA4	6	0.89912	0.90715	0.999911	15384	1	0.020804	0.068227	0.891826	1315	4
CACNA1A	6	0.91123	0.91588	0.999911	15545	1	0.021223	0.069416	0.891826	1339	4
DFNB31	6	0.91639	0.91991	0.999911	15624	1	0.020283	0.066716	0.891826	1287	4
NEDD1	6	0.92091	0.92357	0.999911	15688	1	0.021197	0.069339	0.891826	1336	3
SLC30A7	6	0.92219	0.92458	0.999911	15704	1	0.02068	0.067867	0.891826	1309	2
NECAB1	6	0.93382	0.93449	0.999911	15890	1	0.021212	0.069382	0.891826	1338	3
ERBB2IP	6	0.95116	0.95102	0.999911	16199	0	0.020394	0.067037	0.891826	1294	4
TPD52	6	0.95853	0.9583	0.999911	16331	0	0.021183	0.0693	0.891826	1334	4
ABCC1	6	0.95981	0.95959	0.999911	16362	0	0.02018	0.066425	0.891826	1283	4
ANKIB1	6	0.96085	0.96061	0.999911	16380	0	0.020632	0.06774	0.891826	1307	3
MROH2B	6	0.96175	0.96149	0.999911	16392	0	0.021038	0.068892	0.891826	1326	5
SETDB1	6	0.96227	0.962	0.999911	16408	0	0.02015	0.066347	0.891826	1281	3
WIF1	6	0.96467	0.96448	0.999911	16478	0	0.020467	0.067258	0.891826	1298	4
MOGAT1	5	0.97327	0.9731	0.999911	16658	0	0.02127	0.06956	0.891826	1343	4
EIF4EBP2	2	0.97931	0.97922	0.999911	16761	0	0.020693	0.067908	0.891826	1310	2
PLIN2	3	0.9795	0.97943	0.999911	16764	0	0.0205	0.067353	0.891826	1300	3
NMU	3	0.97958	0.9795	0.999911	16770	0	0.020418	0.067122	0.891826	1296	3
SPATA12	4	0.97968	0.9796	0.999911	16775	0	0.02032	0.066829	0.891826	1290	4
PAIP2B	3	0.97977	0.97969	0.999911	16777	0	0.020229	0.06657	0.891826	1286	3
JUP	6	0.98182	0.98172	0.999911	16809	0	0.02095	0.06865	0.891826	1321	3
SYT17	6	0.98204	0.98194	0.999911	16813	0	0.020989	0.068759	0.891826	1323	4
STX4	6	0.9844	0.9843	0.999911	16877	0	0.021366	0.069827	0.891826	1349	4
HS2ST1	6	0.98494	0.98484	0.999911	16890	0	0.021351	0.069783	0.891826	1347	4
SEC22C	6	0.98855	0.98849	0.999911	16975	0	0.021278	0.069582	0.891826	1344	5
MYBPHL	6	0.99322	0.99317	0.999911	17085	0	0.0213	0.069647	0.891826	1345	5
TSPAN7	6	0.9944	0.9944	0.999911	17113	0	0.021375	0.069848	0.891826	1350	4
OR51M1	2	0.89148	0.90193	0.999911	15274	0	0.021402	0.069921	0.892097	1351	2
KIF2A	6	0.0056908	0.022374	0.742857	514	3	0.0216	0.070493	0.892124	1362	2
GPR45	6	0.084568	0.20499	0.973925	3628	3	0.021616	0.070544	0.892124	1363	3
ZBTB21	6	0.37096	0.55828	0.999911	9274	3	0.021482	0.07014	0.892124	1352	3
EFEMP1	6	0.4571	0.63203	0.999911	10492	2	0.021489	0.070161	0.892124	1353	3
NRXN1	6	0.48714	0.65187	0.999911	10864	1	0.021569	0.070407	0.892124	1358	4
RGR	6	0.69987	0.79417	0.999911	13345	1	0.021573	0.070419	0.892124	1360	3
ASL	6	0.71681	0.80615	0.999911	13546	1	0.021596	0.070485	0.892124	1361	4
CCDC141	6	0.82007	0.86065	0.999911	14504	1	0.021557	0.070369	0.892124	1357	4
SIL1	6	0.99088	0.99088	0.999911	17031	0	0.021572	0.070416	0.892124	1359	5
EMID1	6	0.99253	0.9925	0.999911	17070	0	0.021496	0.070181	0.892124	1354	5
DDX25	6	0.99592	0.99594	0.999911	17145	0	0.02153	0.070296	0.892124	1355	5
FBRS	6	0.99606	0.99606	0.999911	17149	0	0.021542	0.07033	0.892124	1356	5
SKI	6	0.26346	0.44861	0.999911	7486	1	0.021671	0.070732	0.892557	1365	4
KHSRP	6	0.59262	0.72095	0.999911	12056	2	0.02165	0.070653	0.892557	1364	2
COX6A2	3	0.92067	0.92336	0.999911	15685	0	0.021671	0.070733	0.892557	1366	2
CCL17	2	0.97828	0.97812	0.999911	16738	0	0.021723	0.07089	0.893881	1367	2
INVS	6	0.56522	0.70286	0.999911	11725	2	0.021824	0.071171	0.894805	1371	4
SAMD15	5	0.59843	0.72485	0.999911	12126	1	0.021805	0.071125	0.894805	1369	3
AADAT	5	0.75631	0.8312	0.999911	13989	1	0.021823	0.07117	0.894805	1370	3
C11orf93	3	0.84402	0.87332	0.999911	14753	0	0.021801	0.071115	0.894805	1368	2
TMEM130	6	0.015763	0.053609	0.849378	1087	3	0.021906	0.071411	0.894873	1374	1
SMG8	6	0.0404	0.11873	0.922459	2217	2	0.022035	0.071776	0.894873	1381	4
BSDC1	6	0.070526	0.17921	0.96654	3195	3	0.021909	0.071421	0.894873	1375	3
FAM53B	6	0.12486	0.27525	0.987273	4805	1	0.022043	0.071798	0.894873	1382	3
ATP10B	6	0.42597	0.61135	0.999911	10164	3	0.022043	0.0718	0.894873	1383	3
CNKSR3	6	0.45462	0.6304	0.999911	10472	1	0.021992	0.07164	0.894873	1379	4
OVCH1	6	0.62447	0.74289	0.999911	12442	1	0.021884	0.07134	0.894873	1372	4
AKAP3	5	0.78746	0.8448	0.999911	14233	1	0.021916	0.071442	0.894873	1376	4
ZNF557	4	0.93126	0.9323	0.999911	15844	0	0.022031	0.071765	0.894873	1380	3
GJA9	5	0.95011	0.94997	0.999911	16185	0	0.021991	0.071635	0.894873	1378	3
MAFF	3	0.97806	0.9779	0.999911	16734	0	0.021935	0.071488	0.894873	1377	3
NIPSNAP3B	2	0.97811	0.97794	0.999911	16735	0	0.021885	0.071345	0.894873	1373	2
HYAL3	6	0.56853	0.70502	0.999911	11763	1	0.022088	0.071919	0.895714	1384	2
CAV1	6	0.7695	0.83685	0.999911	14079	1	0.022125	0.072026	0.896397	1385	5
FETUB	6	0.9625	0.96223	0.999911	16413	0	0.022189	0.072203	0.897958	1386	5
ARCN1	6	0.96824	0.96808	0.999911	16549	0	0.022241	0.072371	0.899388	1387	3
C1orf109	6	5.264e-05	0.00026107	0.243616	18	4	0.022293	0.072515	0.899882	1389	1
ATP6V1C2	6	0.91772	0.92099	0.999911	15638	1	0.022282	0.072489	0.899882	1388	5
DBX2	6	0.020422	0.067264	0.872339	1324	1	0.022468	0.072985	0.899921	1395	5
C17orf49	6	0.091718	0.21783	0.976168	3840	2	0.022598	0.073324	0.899921	1403	3
ZNF682	2	0.12274	0.27172	0.986094	4747	1	0.022463	0.072979	0.899921	1394	1
APOBEC3H	6	0.13428	0.29099	0.990628	5059	3	0.022519	0.073124	0.899921	1397	2
NEU4	6	0.15522	0.32523	0.999911	5559	1	0.02256	0.073219	0.899921	1401	4
LGI2	6	0.16241	0.33579	0.999911	5715	3	0.022625	0.0734	0.899921	1404	3
FLT3	6	0.18163	0.35756	0.999911	6033	3	0.022735	0.073688	0.899921	1410	3
TMBIM4	6	0.22612	0.40738	0.999911	6828	2	0.022655	0.07347	0.899921	1406	3
SYNJ2	6	0.24918	0.43306	0.999911	7235	3	0.022512	0.073101	0.899921	1396	3
CADPS	6	0.32292	0.51092	0.999911	8493	2	0.022662	0.073487	0.899921	1407	4
PLEKHS1	6	0.37122	0.55854	0.999911	9278	1	0.022743	0.073714	0.899921	1411	5
ZNF512B	6	0.45458	0.63037	0.999911	10471	1	0.02268	0.07354	0.899921	1408	3
CDK5RAP3	4	0.46174	0.63504	0.999911	10546	2	0.022346	0.072664	0.899921	1390	1
LSMEM2	6	0.51384	0.66929	0.999911	11154	2	0.022568	0.073244	0.899921	1402	3
PTDSS1	6	0.58069	0.71305	0.999911	11916	2	0.022524	0.073135	0.899921	1399	4
SPPL3	6	0.6696	0.77342	0.999911	12982	1	0.022394	0.072788	0.899921	1391	5
OPN5	6	0.78787	0.84499	0.999911	14236	1	0.022745	0.073719	0.899921	1412	3
HTR2A	6	0.9215	0.92401	0.999911	15693	1	0.022632	0.073421	0.899921	1405	4
NELL2	6	0.95204	0.95189	0.999911	16219	0	0.022422	0.072866	0.899921	1392	2
LYAR	6	0.95999	0.95975	0.999911	16366	0	0.022455	0.072963	0.899921	1393	5
SPATA32	6	0.97269	0.97254	0.999911	16636	0	0.022519	0.073126	0.899921	1398	4
CDKL5	6	0.99133	0.99133	0.999911	17039	0	0.022691	0.07357	0.899921	1409	5
ANKRD34C	6	0.99247	0.99244	0.999911	17068	0	0.022551	0.073198	0.899921	1400	3
TRIM41	6	0.032948	0.10176	0.907325	1932	2	0.022874	0.074096	0.901084	1416	2
PTPLAD1	5	0.24968	0.43361	0.999911	7247	1	0.022859	0.07406	0.901084	1414	4
ECI1	6	0.26922	0.45493	0.999911	7599	3	0.022809	0.073908	0.901084	1413	3
ELFN2	5	0.52235	0.67475	0.999911	11258	2	0.022876	0.074107	0.901084	1417	3
GALNT16	6	0.54001	0.68626	0.999911	11451	2	0.022861	0.074065	0.901084	1415	4
PUM1	6	0.61057	0.73326	0.999911	12271	2	0.022884	0.074128	0.901084	1418	3
LIG4	2	0.32199	0.51	0.999911	8476	1	0.022961	0.074343	0.902196	1420	1
PUS3	6	0.60636	0.73037	0.999911	12211	2	0.023002	0.074461	0.902196	1422	1
FBXO10	6	0.61878	0.73899	0.999911	12358	2	0.022938	0.074272	0.902196	1419	3
STAT5B	6	0.87313	0.89027	0.999911	15045	1	0.023043	0.074567	0.902196	1424	5
MAGED2	6	0.89643	0.90531	0.999911	15350	1	0.023014	0.074498	0.902196	1423	5
CABLES1	6	0.98104	0.98096	0.999911	16797	0	0.02305	0.074585	0.902196	1425	4
LINGO1	6	0.99376	0.99373	0.999911	17098	0	0.022978	0.074389	0.902196	1421	5
USP6NL	5	0.3181	0.50609	0.999911	8405	2	0.023296	0.075256	0.903331	1436	3
GLB1L	6	0.42711	0.61241	0.999911	10178	2	0.023234	0.075086	0.903331	1432	4
NFRKB	6	0.46132	0.63477	0.999911	10544	1	0.023167	0.074919	0.903331	1427	4
WRNIP1	6	0.63287	0.74871	0.999911	12563	1	0.023275	0.0752	0.903331	1434	4
BCL11A	6	0.84357	0.87307	0.999911	14748	1	0.023186	0.074971	0.903331	1429	3
VWC2L	6	0.84652	0.8747	0.999911	14781	1	0.02326	0.075161	0.903331	1433	3
ACTN3	6	0.91915	0.92212	0.999911	15662	1	0.023131	0.074812	0.903331	1426	4
PRKCQ	6	0.92484	0.92679	0.999911	15738	1	0.023183	0.074963	0.903331	1428	4
DIAPH2	6	0.98929	0.98924	0.999911	16990	0	0.023284	0.075222	0.903331	1435	5
FOXG1	6	0.99436	0.99436	0.999911	17112	0	0.0232	0.075001	0.903331	1431	4
GRIA4	6	0.9953	0.99532	0.999911	17136	0	0.023193	0.074986	0.903331	1430	5
CCDC81	6	0.2153	0.39535	0.999911	6649	1	0.023387	0.075507	0.904492	1437	5
FBXW12	6	0.24978	0.43372	0.999911	7251	2	0.023491	0.075805	0.904492	1444	4
MSN	5	0.45017	0.62743	0.999911	10421	1	0.023473	0.075744	0.904492	1443	4
SOX1	6	0.45244	0.62893	0.999911	10451	2	0.023518	0.075877	0.904492	1446	4
ECE2	6	0.63858	0.75269	0.999911	12628	2	0.023409	0.075578	0.904492	1440	3
WDR46	6	0.70757	0.79946	0.999911	13443	2	0.023453	0.075691	0.904492	1442	2
TRMT1L	6	0.80909	0.85511	0.999911	14412	1	0.023407	0.075577	0.904492	1439	4
CEP68	6	0.82965	0.86558	0.999911	14600	1	0.023515	0.075868	0.904492	1445	5
ALX3	6	0.90583	0.9119	0.999911	15486	1	0.0234	0.075548	0.904492	1438	5
OR52R1	3	0.97656	0.97638	0.999911	16718	0	0.023442	0.075657	0.904492	1441	3
EPHA1	6	0.0040994	0.016993	0.703337	415	4	0.024054	0.077341	0.906374	1466	2
CST3	5	0.012895	0.045002	0.822652	938	2	0.023887	0.076866	0.906374	1459	2
ATP2B4	6	0.084772	0.20537	0.974392	3633	2	0.024201	0.077764	0.906374	1475	4
TTC38	6	0.11767	0.2632	0.984268	4604	4	0.024097	0.077457	0.906374	1471	2
FIZ1	6	0.14781	0.31342	0.999911	5385	3	0.023969	0.077116	0.906374	1464	2
IFI16	6	0.18137	0.35728	0.999911	6029	2	0.024186	0.077721	0.906374	1474	4
METRN	6	0.1918	0.36911	0.999911	6227	2	0.023647	0.076204	0.906374	1449	2
CXorf24	4	0.1958	0.37364	0.999911	6305	2	0.023767	0.076529	0.906374	1452	2
FAM83D	6	0.24873	0.43259	0.999911	7228	2	0.024327	0.078107	0.906374	1479	3
GYS1	6	0.25167	0.43583	0.999911	7276	3	0.024291	0.078001	0.906374	1478	2
RALGAPB	6	0.31123	0.49909	0.999911	8292	2	0.024086	0.077425	0.906374	1469	3
CLCC1	6	0.31419	0.50219	0.999911	8337	2	0.023775	0.076547	0.906374	1454	3
LDOC1L	6	0.31725	0.50522	0.999911	8390	2	0.024355	0.078194	0.906374	1481	4
TMEM41B	4	0.32709	0.5152	0.999911	8577	2	0.023888	0.07687	0.906374	1460	2
ODC1	6	0.38813	0.57496	0.999911	9527	2	0.024501	0.07859	0.906374	1491	2
PLK4	6	0.41923	0.60489	0.999911	10053	2	0.024569	0.078763	0.906374	1497	3
ZFR	6	0.44274	0.62259	0.999911	10347	2	0.024572	0.078769	0.906374	1498	3
FAM115A	4	0.46094	0.63454	0.999911	10540	2	0.023638	0.076183	0.906374	1448	1
C7orf62	5	0.5018	0.66165	0.999911	11027	1	0.024373	0.078235	0.906374	1482	4
RND3	6	0.53116	0.68046	0.999911	11347	2	0.024484	0.078547	0.906374	1488	3
GNA12	6	0.59939	0.72555	0.999911	12137	2	0.024488	0.078559	0.906374	1489	4
YIPF6	5	0.63054	0.74709	0.999911	12529	2	0.024531	0.078665	0.906374	1496	2
MORC1	6	0.68528	0.78401	0.999911	13175	1	0.024337	0.078141	0.906374	1480	5
GDAP1L1	6	0.69701	0.79213	0.999911	13307	1	0.023737	0.076453	0.906374	1450	5
PHF1	6	0.72083	0.80896	0.999911	13604	2	0.024419	0.078364	0.906374	1485	3
PITX3	6	0.73988	0.82281	0.999911	13841	1	0.024061	0.077364	0.906374	1467	5
FAM98A	6	0.74198	0.82438	0.999911	13872	2	0.024226	0.077822	0.906374	1476	3
SYCN	6	0.76209	0.83364	0.999911	14030	1	0.024505	0.078599	0.906374	1493	5
ABHD12	6	0.77988	0.84141	0.999911	14167	1	0.023873	0.076821	0.906374	1458	5
FOXO4	6	0.85211	0.87783	0.999911	14840	1	0.024418	0.078359	0.906374	1484	4
CACNA1B	6	0.85335	0.87852	0.999911	14850	1	0.024421	0.07837	0.906374	1486	5
ZNF214	3	0.85463	0.87925	0.999911	14867	0	0.023936	0.076997	0.906374	1462	1
MAZ	6	0.85896	0.88179	0.999911	14912	1	0.024407	0.078327	0.906374	1483	4
STMN1	4	0.86959	0.8881	0.999911	15010	0	0.023775	0.076546	0.906374	1453	2
TPRN	6	0.88164	0.8955	0.999911	15159	1	0.024501	0.07859	0.906374	1492	5
OTUD6A	5	0.88573	0.89808	0.999911	15207	1	0.024083	0.077417	0.906374	1468	3
ZNF235	3	0.89679	0.90557	0.999911	15355	0	0.023613	0.076124	0.906374	1447	2
GALNT12	6	0.90134	0.9087	0.999911	15410	1	0.02418	0.077701	0.906374	1473	5
CARKD	6	0.9019	0.9091	0.999911	15418	1	0.023791	0.076592	0.906374	1455	5
SLC1A5	6	0.93221	0.93309	0.999911	15859	1	0.023939	0.07701	0.906374	1463	4
LRIG2	6	0.93417	0.93479	0.999911	15900	1	0.024162	0.077643	0.906374	1472	2
THRB	6	0.94059	0.9406	0.999911	16012	1	0.024086	0.077426	0.906374	1470	5
PARL	3	0.9454	0.94528	0.999911	16102	0	0.023791	0.076594	0.906374	1456	3
RRAD	6	0.96105	0.96081	0.999911	16381	0	0.024488	0.078559	0.906374	1490	5
JMJD7	6	0.96366	0.96346	0.999911	16449	0	0.024519	0.078634	0.906374	1494	5
TMEM168	6	0.96419	0.964	0.999911	16467	0	0.024006	0.077211	0.906374	1465	4
PDXP	3	0.97548	0.97532	0.999911	16704	0	0.024524	0.078645	0.906374	1495	3
GYPB	1	0.97575	0.97559	0.999911	16707	0	0.02425	0.077893	0.906374	1477	1
RLN1	1	0.97607	0.97591	0.999911	16714	0	0.023932	0.076984	0.906374	1461	1
TLE3	6	0.98384	0.98374	0.999911	16862	0	0.02386	0.076782	0.906374	1457	5
CAMSAP1	6	0.9869	0.98681	0.999911	16939	0	0.02446	0.078484	0.906374	1487	5
STX1B	6	0.99557	0.99559	0.999911	17141	0	0.023751	0.076493	0.906374	1451	5
BIN3	6	0.2897	0.47691	0.999911	7937	3	0.024595	0.078838	0.906465	1499	3
GGNBP2	6	0.40389	0.5901	0.999911	9784	2	0.024612	0.078883	0.906465	1500	3
NUDT12	5	0.47656	0.64482	0.999911	10729	1	0.024647	0.078988	0.906465	1502	4
RHBG	6	0.83355	0.86766	0.999911	14632	1	0.024632	0.078946	0.906465	1501	5
TRNP1	3	0.96793	0.96778	0.999911	16541	0	0.024715	0.079192	0.908207	1503	3
MCTP2	6	0.049253	0.13711	0.933209	2527	2	0.025233	0.080666	0.909077	1527	4
GRXCR1	6	0.075195	0.18803	0.96654	3336	2	0.024827	0.07949	0.909077	1506	4
FRRS1	6	0.086978	0.20943	0.97582	3696	3	0.02532	0.080911	0.909077	1533	2
LETMD1	6	0.20284	0.38144	0.999911	6438	2	0.025063	0.080182	0.909077	1516	2
NEURL1B	6	0.2778	0.46413	0.999911	7741	1	0.025191	0.080542	0.909077	1523	3
NANOS1	4	0.32246	0.51044	0.999911	8479	1	0.024881	0.079643	0.909077	1509	3
LUM	4	0.35003	0.53797	0.999911	8942	1	0.025315	0.080898	0.909077	1532	1
CPO	3	0.38551	0.57239	0.999911	9496	1	0.025164	0.080461	0.909077	1522	1
ZNF197	6	0.39843	0.58487	0.999911	9695	2	0.024892	0.079671	0.909077	1510	3
IYD	5	0.58073	0.71307	0.999911	11917	1	0.025097	0.080269	0.909077	1517	2
NOS1AP	6	0.59266	0.72098	0.999911	12057	2	0.024912	0.079737	0.909077	1511	3
OLR1	6	0.59539	0.72278	0.999911	12089	1	0.025277	0.080793	0.909077	1531	5
MRS2	6	0.67621	0.77788	0.999911	13063	1	0.02496	0.079874	0.909077	1513	5
LYN	6	0.73386	0.81844	0.999911	13758	1	0.024955	0.079857	0.909077	1512	5
ZNF319	4	0.76179	0.8335	0.999911	14025	1	0.024765	0.079328	0.909077	1504	3
CORO1A	6	0.78669	0.84446	0.999911	14225	1	0.025323	0.080921	0.909077	1534	5
SLC41A2	4	0.80598	0.85358	0.999911	14388	1	0.025143	0.080402	0.909077	1521	2
KDM4A	6	0.80639	0.8538	0.999911	14393	1	0.02524	0.080686	0.909077	1529	4
EMX1	6	0.81092	0.85605	0.999911	14430	1	0.025233	0.080664	0.909077	1526	4
ICA1	6	0.87469	0.89121	0.999911	15067	1	0.024837	0.079515	0.909077	1507	5
GPR3	5	0.8836	0.89672	0.999911	15182	1	0.025229	0.080646	0.909077	1525	3
PHYHIP	6	0.89032	0.90108	0.999911	15260	1	0.025235	0.080672	0.909077	1528	5
IL7	3	0.89653	0.90539	0.999911	15351	0	0.025023	0.080065	0.909077	1515	2
ATXN2L	6	0.89819	0.90652	0.999911	15374	1	0.024998	0.079988	0.909077	1514	2
FAM64A	6	0.91846	0.92156	0.999911	15646	1	0.02487	0.079607	0.909077	1508	4
POGZ	6	0.93729	0.9376	0.999911	15955	1	0.025355	0.081001	0.909077	1535	4
DNAH10	6	0.94255	0.94251	0.999911	16044	1	0.024805	0.079442	0.909077	1505	4
DECR1	6	0.9636	0.9634	0.999911	16445	0	0.025266	0.080762	0.909077	1530	4
LONRF3	6	0.97216	0.97201	0.999911	16622	0	0.025124	0.080343	0.909077	1518	3
KRTAP12-2	1	0.97478	0.97461	0.999911	16688	0	0.025224	0.080634	0.909077	1524	1
CHN1	6	0.97849	0.97835	0.999911	16744	0	0.025357	0.081008	0.909077	1536	4
WDR66	6	0.98269	0.98259	0.999911	16832	0	0.02513	0.080357	0.909077	1520	5
RAB3IP	6	0.99688	0.99689	0.999911	17164	0	0.025126	0.080347	0.909077	1519	5
GPR27	5	0.00037293	0.0017878	0.406787	75	4	0.026944	0.085413	0.910314	1613	1
SLC3A1	6	0.0040339	0.01676	0.702886	411	2	0.026837	0.085106	0.910314	1607	4
HELB	6	0.0067487	0.025828	0.749942	593	2	0.025549	0.081555	0.910314	1541	4
TMEM35	5	0.021928	0.071526	0.872339	1400	3	0.026676	0.084686	0.910314	1602	1
SAMD4A	6	0.028168	0.088753	0.886353	1724	4	0.025815	0.082308	0.910314	1555	2
FRRS1L	6	0.036471	0.11032	0.908902	2092	3	0.027034	0.085677	0.910314	1616	3
SRRM3	6	0.046516	0.13153	0.932898	2423	4	0.02701	0.085618	0.910314	1615	2
KRT80	6	0.051161	0.141	0.934199	2598	3	0.026927	0.085362	0.910314	1610	2
EXOSC9	6	0.061699	0.16216	0.955421	2922	4	0.027826	0.087782	0.910314	1658	2
UPB1	6	0.065747	0.17002	0.961479	3048	2	0.027953	0.088129	0.910314	1666	4
DOK5	6	0.08413	0.20419	0.972561	3618	4	0.027569	0.087095	0.910314	1647	2
ABCD1	6	0.11418	0.25707	0.983886	4503	3	0.02667	0.084669	0.910314	1601	2
NAGS	6	0.12833	0.28117	0.98761	4904	2	0.027912	0.088021	0.910314	1662	4
MRPS9	6	0.14194	0.30381	0.993509	5268	3	0.027184	0.08606	0.910314	1624	2
ANKRD54	6	0.18132	0.35724	0.999911	6028	3	0.027376	0.086582	0.910314	1632	1
MAPKAPK2	6	0.19099	0.36814	0.999911	6214	1	0.027984	0.088213	0.910314	1669	5
PIK3AP1	6	0.19265	0.37007	0.999911	6242	3	0.026186	0.083316	0.910314	1574	3
TG	6	0.19793	0.37597	0.999911	6340	3	0.027633	0.087273	0.910314	1648	2
GPRC6A	6	0.23	0.41168	0.999911	6895	2	0.025598	0.081676	0.910314	1546	4
GYPC	5	0.2341	0.41634	0.999911	6964	1	0.025815	0.082311	0.910314	1556	4
UQCRC1	6	0.23682	0.41939	0.999911	7016	2	0.027817	0.087755	0.910314	1657	3
EIF3I	5	0.24117	0.42426	0.999911	7095	2	0.026904	0.085303	0.910314	1609	2
CCNY	6	0.24763	0.43135	0.999911	7208	3	0.027761	0.087633	0.910314	1655	1
JMJD8	6	0.25352	0.43788	0.999911	7301	2	0.026133	0.083177	0.910314	1571	4
GPA33	6	0.25507	0.43954	0.999911	7333	2	0.026606	0.084494	0.910314	1597	2
CYFIP1	6	0.25561	0.44009	0.999911	7339	3	0.027312	0.086397	0.910314	1628	2
SH2D6	4	0.27406	0.46011	0.999911	7677	1	0.026903	0.085301	0.910314	1608	2
STT3B	6	0.27437	0.46043	0.999911	7682	2	0.025868	0.08245	0.910314	1557	4
THSD7A	6	0.27454	0.46061	0.999911	7685	3	0.027697	0.087452	0.910314	1651	2
TBX15	6	0.27624	0.46242	0.999911	7712	2	0.02577	0.082177	0.910314	1554	2
ZHX1	5	0.28052	0.46703	0.999911	7793	2	0.027105	0.085846	0.910314	1620	3
MFSD2A	6	0.28583	0.47279	0.999911	7880	1	0.027182	0.086058	0.910314	1623	3
P2RX1	6	0.31332	0.5013	0.999911	8324	1	0.026531	0.084285	0.910314	1591	4
MED21	4	0.31396	0.50195	0.999911	8331	2	0.027719	0.087515	0.910314	1653	1
HEG1	6	0.32256	0.51054	0.999911	8485	3	0.026523	0.084263	0.910314	1590	3
GPATCH1	6	0.33631	0.52449	0.999911	8718	2	0.027951	0.088124	0.910314	1665	4
LY6G6F	6	0.35004	0.53799	0.999911	8943	1	0.027374	0.086571	0.910314	1631	4
INTS12	6	0.37059	0.55792	0.999911	9269	2	0.026205	0.083366	0.910314	1575	4
CUZD1	6	0.3841	0.57102	0.999911	9470	1	0.026079	0.083024	0.910314	1569	4
NUDCD1	6	0.39225	0.57891	0.999911	9600	1	0.027921	0.088047	0.910314	1663	4
NLRP14	5	0.39904	0.58551	0.999911	9709	2	0.02572	0.082035	0.910314	1553	2
ZNF837	4	0.40809	0.59421	0.999911	9870	1	0.02555	0.081556	0.910314	1542	3
MIF	6	0.41912	0.60479	0.999911	10050	1	0.025471	0.081331	0.910314	1538	5
MECP2	6	0.42832	0.6132	0.999911	10191	1	0.025525	0.081486	0.910314	1539	4
WNT4	6	0.43814	0.61957	0.999911	10294	2	0.026142	0.083194	0.910314	1572	4
SIPA1L1	6	0.44207	0.62216	0.999911	10341	2	0.027355	0.08652	0.910314	1629	4
GRID1	6	0.46685	0.63838	0.999911	10616	1	0.02559	0.081662	0.910314	1544	4
PTPRR	6	0.48742	0.65204	0.999911	10871	1	0.025899	0.082556	0.910314	1561	3
LYVE1	6	0.48814	0.65252	0.999911	10879	2	0.025545	0.081541	0.910314	1540	4
STUB1	6	0.49857	0.65955	0.999911	10983	1	0.026397	0.083898	0.910314	1583	5
NOL4	6	0.50568	0.66413	0.999911	11065	2	0.027119	0.085889	0.910314	1621	2
RSPO2	4	0.50939	0.66647	0.999911	11102	1	0.027544	0.087018	0.910314	1645	3
CSF3R	6	0.52218	0.67465	0.999911	11257	2	0.02744	0.086747	0.910314	1637	3
ZSCAN20	6	0.54038	0.68651	0.999911	11456	2	0.025986	0.082775	0.910314	1566	3
FAM120B	6	0.54249	0.68784	0.999911	11481	1	0.025598	0.081676	0.910314	1545	4
TFPT	6	0.55095	0.69347	0.999911	11570	2	0.027152	0.085982	0.910314	1622	3
GDF15	6	0.56094	0.70007	0.999911	11673	2	0.027425	0.086705	0.910314	1636	4
CCDC13	6	0.56879	0.70518	0.999911	11767	1	0.027538	0.087006	0.910314	1644	5
DBT	3	0.57231	0.70751	0.999911	11812	1	0.027262	0.086266	0.910314	1626	2
SDHD	2	0.57543	0.70959	0.999911	11850	1	0.026011	0.082834	0.910314	1567	1
USP2	6	0.59464	0.72226	0.999911	12084	2	0.027837	0.08782	0.910314	1659	3
ZNF223	6	0.59681	0.72372	0.999911	12104	1	0.026648	0.084609	0.910314	1599	5
DOCK7	6	0.60788	0.73142	0.999911	12238	2	0.027703	0.087473	0.910314	1652	4
CRYL1	6	0.60864	0.73195	0.999911	12248	1	0.027055	0.085722	0.910314	1617	2
METTL12	6	0.61448	0.73597	0.999911	12313	2	0.026413	0.083945	0.910314	1584	3
CCDC78	6	0.66809	0.77241	0.999911	12958	1	0.02679	0.084984	0.910314	1604	4
ACSM2A	2	0.67422	0.77654	0.999911	13040	0	0.025882	0.082493	0.910314	1559	1
TSTD1	6	0.67873	0.77956	0.999911	13103	2	0.026212	0.083383	0.910314	1577	3
CUEDC1	6	0.67972	0.78025	0.999911	13112	1	0.025984	0.082772	0.910314	1565	2
VPS37B	5	0.68808	0.78587	0.999911	13211	1	0.026439	0.084015	0.910314	1586	3
SERPINH1	5	0.70499	0.79768	0.999911	13414	1	0.027502	0.086917	0.910314	1641	3
CLEC9A	6	0.71894	0.80765	0.999911	13570	1	0.026312	0.083664	0.910314	1580	3
ATP13A3	6	0.73212	0.81719	0.999911	13741	1	0.026206	0.083367	0.910314	1576	4
MSLNL	6	0.73378	0.81839	0.999911	13756	2	0.027294	0.08634	0.910314	1627	3
DNAJB13	6	0.73913	0.82229	0.999911	13823	1	0.027484	0.08686	0.910314	1639	5
MTMR3	6	0.74354	0.82555	0.999911	13896	1	0.027782	0.087675	0.910314	1656	4
TET2	6	0.74379	0.82573	0.999911	13901	2	0.027492	0.086886	0.910314	1640	4
SPATA13	6	0.74783	0.82771	0.999911	13934	1	0.026157	0.08324	0.910314	1573	5
SYNJ2BP	3	0.75557	0.8309	0.999911	13985	1	0.026502	0.084203	0.910314	1588	2
SCN5A	6	0.75805	0.8319	0.999911	13999	1	0.025706	0.082	0.910314	1552	2
CCL23	4	0.75822	0.83197	0.999911	14002	1	0.027923	0.088051	0.910314	1664	3
SULT1C3	3	0.77344	0.83857	0.999911	14118	0	0.027455	0.08679	0.910314	1638	2
FGD4	6	0.77699	0.84012	0.999911	14142	1	0.02666	0.084643	0.910314	1600	4
BRD1	6	0.80021	0.85077	0.999911	14346	1	0.026373	0.083833	0.910314	1581	4
RCOR2	6	0.81631	0.85875	0.999911	14478	1	0.027421	0.08669	0.910314	1635	4
IAH1	4	0.82338	0.86234	0.999911	14536	1	0.025891	0.082527	0.910314	1560	3
CRYZ	6	0.82422	0.86277	0.999911	14543	1	0.027373	0.086567	0.910314	1630	5
MICAL2	6	0.82481	0.86308	0.999911	14546	1	0.027561	0.087068	0.910314	1646	5
TMEM26	6	0.83645	0.86919	0.999911	14666	1	0.027073	0.085767	0.910314	1619	4
DNAJB6	3	0.87495	0.89137	0.999911	15071	0	0.026583	0.084427	0.910314	1594	2
CD44	6	0.88554	0.89796	0.999911	15203	1	0.025439	0.081234	0.910314	1537	5
TMEM81	4	0.88864	0.90002	0.999911	15236	0	0.026834	0.085099	0.910314	1606	3
HERC6	6	0.89036	0.90111	0.999911	15262	1	0.027841	0.087832	0.910314	1660	5
HTR3E	6	0.90206	0.9092	0.999911	15425	1	0.026597	0.084473	0.910314	1595	5
ANO2	6	0.90466	0.91105	0.999911	15461	1	0.025556	0.081574	0.910314	1543	5
TBCK	6	0.90478	0.91114	0.999911	15464	1	0.027954	0.088132	0.910314	1667	4
RABGAP1L	6	0.91604	0.91962	0.999911	15620	1	0.027507	0.086929	0.910314	1643	4
CAMK1G	6	0.92692	0.92855	0.999911	15775	1	0.026612	0.084516	0.910314	1598	5
ASPHD2	6	0.93929	0.93939	0.999911	15986	1	0.026605	0.084492	0.910314	1596	3
APOA4	6	0.94314	0.94308	0.999911	16057	1	0.025659	0.081867	0.910314	1549	5
C1RL	6	0.9437	0.94362	0.999911	16067	1	0.028018	0.08832	0.910314	1672	5
MAP3K5	6	0.94778	0.94765	0.999911	16144	0	0.026276	0.083559	0.910314	1579	4
GLIS2	6	0.95377	0.95359	0.999911	16249	0	0.027893	0.087964	0.910314	1661	5
FLG	4	0.95489	0.95473	0.999911	16263	0	0.02626	0.083512	0.910314	1578	3
TBX5	6	0.9573	0.95704	0.999911	16307	0	0.026568	0.084388	0.910314	1593	3
ATP8B1	6	0.95735	0.9571	0.999911	16309	0	0.028015	0.088315	0.910314	1671	4
FAR2	6	0.96467	0.96448	0.999911	16473	0	0.02654	0.084309	0.910314	1592	5
MTF1	6	0.97085	0.97069	0.999911	16604	0	0.026696	0.084733	0.910314	1603	4
UQCRH	1	0.97202	0.97187	0.999911	16619	0	0.027984	0.088214	0.910314	1670	1
ALDH3B2	3	0.97234	0.97219	0.999911	16626	0	0.02766	0.087349	0.910314	1649	3
OTUD6B	2	0.97261	0.97246	0.999911	16633	0	0.027387	0.086605	0.910314	1634	2
FOPNL	2	0.97262	0.97246	0.999911	16634	0	0.027383	0.086599	0.910314	1633	2
MYL12A	1	0.97276	0.97261	0.999911	16637	0	0.027239	0.0862	0.910314	1625	1
COQ10B	3	0.97294	0.97279	0.999911	16645	0	0.027064	0.085747	0.910314	1618	3
ACOT4	2	0.97304	0.97288	0.999911	16650	0	0.026961	0.085469	0.910314	1614	2
MAGEA1	1	0.9732	0.97303	0.999911	16656	0	0.026801	0.085004	0.910314	1605	1
ZNF534	3	0.97349	0.97332	0.999911	16660	0	0.026511	0.08422	0.910314	1589	3
GTF2H1	1	0.97354	0.97337	0.999911	16664	0	0.026462	0.084084	0.910314	1587	1
SLC9C1	1	0.97358	0.97341	0.999911	16666	0	0.026424	0.08398	0.910314	1585	1
RCC2	2	0.97361	0.97344	0.999911	16667	0	0.026392	0.083888	0.910314	1582	2
IL33	2	0.9739	0.97374	0.999911	16670	0	0.026101	0.083087	0.910314	1570	2
PHOSPHO2	2	0.97407	0.9739	0.999911	16673	0	0.02593	0.082633	0.910314	1564	2
MAGEA12	1	0.97413	0.97398	0.999911	16676	0	0.025871	0.082458	0.910314	1558	1
OR4K17	2	0.97437	0.97423	0.999911	16680	0	0.025629	0.081781	0.910314	1547	2
FOXB1	5	0.97615	0.97599	0.999911	16715	0	0.026935	0.085389	0.910314	1612	4
STIM1	6	0.97906	0.97894	0.999911	16752	0	0.027719	0.087515	0.910314	1654	5
CTNNA3	6	0.97907	0.97895	0.999911	16753	0	0.026933	0.085384	0.910314	1611	4
DKK2	6	0.98033	0.98024	0.999911	16784	0	0.026028	0.082879	0.910314	1568	4
CHMP1B	5	0.98265	0.98253	0.999911	16830	0	0.0257	0.081985	0.910314	1551	4
AP3M2	6	0.98374	0.98365	0.999911	16858	0	0.028028	0.088354	0.910314	1673	4
HK1	6	0.98505	0.98496	0.999911	16892	0	0.02592	0.082612	0.910314	1563	5
ROR1	6	0.98565	0.98557	0.999911	16905	0	0.02592	0.082612	0.910314	1562	5
PRR16	6	0.98733	0.98725	0.999911	16947	0	0.025693	0.081967	0.910314	1550	4
SASS6	5	0.99067	0.99068	0.999911	17027	0	0.025647	0.081833	0.910314	1548	4
TCTE3	5	0.99193	0.99191	0.999911	17056	0	0.027506	0.086924	0.910314	1642	4
SSH1	6	0.99246	0.99242	0.999911	17067	0	0.027961	0.088148	0.910314	1668	5
ARHGEF6	6	0.99507	0.99509	0.999911	17131	0	0.027683	0.087418	0.910314	1650	4
GPR142	6	0.44929	0.62687	0.999911	10411	2	0.028092	0.08853	0.910492	1676	4
PIR	6	0.62426	0.74274	0.999911	12439	2	0.02809	0.088527	0.910492	1674	3
CTSH	6	0.93275	0.93356	0.999911	15870	1	0.028092	0.08853	0.910492	1675	4
KL	6	0.052115	0.14295	0.934719	2632	4	0.028339	0.089207	0.910548	1688	1
PPP3CA	6	0.10958	0.24914	0.982777	4365	2	0.028341	0.089222	0.910548	1689	3
DNAJC17	6	0.43733	0.61905	0.999911	10285	2	0.028241	0.088929	0.910548	1682	2
GYG2	6	0.50404	0.66307	0.999911	11049	1	0.028227	0.088894	0.910548	1679	4
KRT37	3	0.52429	0.67604	0.999911	11282	1	0.028229	0.088896	0.910548	1680	2
TMEM43	6	0.7982	0.84983	0.999911	14321	1	0.028275	0.08902	0.910548	1685	2
STAG3	6	0.83229	0.86698	0.999911	14616	1	0.028215	0.088869	0.910548	1678	4
ABCB6	6	0.88178	0.89558	0.999911	15162	1	0.028266	0.088997	0.910548	1684	4
SRRM4	6	0.89533	0.90457	0.999911	15332	1	0.02825	0.088958	0.910548	1683	5
TNN	6	0.96046	0.96021	0.999911	16374	0	0.028213	0.088861	0.910548	1677	4
NPHP1	6	0.96502	0.96484	0.999911	16483	0	0.028297	0.089087	0.910548	1686	3
LRRC38	6	0.99014	0.99011	0.999911	17011	0	0.028332	0.089188	0.910548	1687	5
ZFAND4	6	0.99549	0.99551	0.999911	17139	0	0.028239	0.088923	0.910548	1681	5
SLC17A3	6	0.38401	0.57095	0.999911	9468	2	0.028392	0.08935	0.910783	1691	3
SELENBP1	6	0.9689	0.96875	0.999911	16561	0	0.028371	0.089304	0.910783	1690	4
CHKA	6	0.8997	0.90756	0.999911	15393	1	0.028429	0.089448	0.911233	1692	5
SPEF1	6	0.11832	0.26429	0.984268	4626	4	0.028467	0.089554	0.911777	1693	1
KHDRBS3	6	0.043389	0.12499	0.927357	2320	3	0.028493	0.089626	0.911975	1694	3
RNF31	6	0.096998	0.22718	0.977772	4005	2	0.028531	0.08975	0.912155	1696	3
LRFN5	6	0.9637	0.9635	0.999911	16450	0	0.028524	0.08973	0.912155	1695	4
HDAC1	6	0.62035	0.74006	0.999911	12377	1	0.028596	0.089926	0.912871	1698	5
PIGG	6	0.81136	0.85625	0.999911	14434	1	0.028591	0.089912	0.912871	1697	4
SIRPB2	6	0.99363	0.99359	0.999911	17094	0	0.028621	0.08999	0.91298	1699	5
NCOA3	6	0.84061	0.87146	0.999911	14714	1	0.028654	0.090082	0.913375	1700	5
YLPM1	6	0.086003	0.20763	0.975208	3669	3	0.028724	0.090261	0.913413	1702	3
RPS6KA5	6	0.2677	0.45327	0.999911	7564	2	0.02877	0.090382	0.913413	1704	4
FOXN4	6	0.50503	0.66371	0.999911	11058	1	0.028852	0.090615	0.913413	1710	2
BRAF	6	0.57862	0.71167	0.999911	11897	2	0.028846	0.090603	0.913413	1709	2
P2RY10	5	0.63699	0.75156	0.999911	12606	2	0.028763	0.090367	0.913413	1703	3
FEM1B	6	0.86486	0.88524	0.999911	14966	1	0.028825	0.090539	0.913413	1708	5
PHF16	6	0.91061	0.91542	0.999911	15536	1	0.028821	0.090531	0.913413	1707	2
COG7	6	0.91491	0.9187	0.999911	15598	1	0.028798	0.090464	0.913413	1705	5
APPL1	6	0.97692	0.97674	0.999911	16724	0	0.028693	0.090182	0.913413	1701	5
SAP30L	6	0.98824	0.98818	0.999911	16970	0	0.028803	0.09048	0.913413	1706	4
SCN4B	6	0.00071973	0.0033341	0.481552	118	3	0.03093	0.096156	0.913756	1805	3
ZNFX1	6	0.01477	0.050633	0.838393	1041	4	0.030262	0.09442	0.913756	1776	2
ACAP1	6	0.020305	0.066903	0.872339	1317	3	0.030813	0.095826	0.913756	1801	3
C16orf11	6	0.02326	0.075209	0.872339	1473	2	0.030646	0.095372	0.913756	1793	3
MPPED2	6	0.027184	0.086015	0.881901	1677	2	0.029895	0.093445	0.913756	1754	3
PDE6A	6	0.029365	0.092094	0.894327	1775	1	0.028902	0.090762	0.913756	1711	5
FAM19A4	6	0.03582	0.10894	0.908332	2066	1	0.030204	0.094252	0.913756	1768	3
MATN3	6	0.038049	0.1137	0.916337	2138	2	0.030354	0.094645	0.913756	1780	4
COL6A5	6	0.04319	0.12459	0.927357	2312	1	0.029596	0.092619	0.913756	1738	3
TRIM14	6	0.049704	0.13804	0.933209	2547	4	0.029941	0.093571	0.913756	1755	1
CCDC11	6	0.050953	0.14061	0.934199	2592	2	0.029869	0.093374	0.913756	1750	4
FN3KRP	6	0.05742	0.15366	0.944249	2805	3	0.029877	0.093402	0.913756	1753	3
PCYOX1L	6	0.059197	0.15716	0.949771	2851	4	0.03071	0.095548	0.913756	1796	1
SPDYC	6	0.064388	0.16738	0.959109	3008	2	0.030326	0.094575	0.913756	1777	3
CWH43	6	0.073312	0.18444	0.96654	3281	2	0.029582	0.092582	0.913756	1737	3
CDH23	6	0.076922	0.19124	0.96654	3397	3	0.029172	0.091498	0.913756	1722	3
GSDMA	6	0.07723	0.19176	0.96654	3407	3	0.029044	0.091142	0.913756	1716	2
DAK	6	0.094214	0.22224	0.976168	3922	3	0.02943	0.092191	0.913756	1734	3
XPNPEP2	6	0.096183	0.22574	0.976966	3980	3	0.030655	0.095397	0.913756	1794	3
ZNF219	6	0.12127	0.26923	0.984268	4714	3	0.031414	0.097454	0.913756	1834	1
ZDHHC19	6	0.1228	0.27182	0.986094	4751	2	0.031231	0.096983	0.913756	1822	4
ANKRD42	6	0.13045	0.28469	0.988425	4959	2	0.031158	0.096782	0.913756	1816	1
UNC79	6	0.13658	0.29484	0.992078	5118	2	0.030221	0.094306	0.913756	1772	4
TENM2	6	0.14886	0.31515	0.999911	5407	1	0.029802	0.093175	0.913756	1748	4
MIA	5	0.16114	0.33432	0.999911	5692	1	0.031378	0.097356	0.913756	1830	4
AP1G2	6	0.18582	0.36232	0.999911	6106	2	0.031422	0.097477	0.913756	1835	3
JUN	6	0.19415	0.37179	0.999911	6268	3	0.029301	0.091845	0.913756	1730	2
TACR3	6	0.19949	0.3777	0.999911	6368	1	0.030911	0.096108	0.913756	1804	3
MSL1	6	0.2071	0.38624	0.999911	6510	2	0.031074	0.096543	0.913756	1813	2
LAMA1	6	0.21847	0.39885	0.999911	6704	3	0.030553	0.095129	0.913756	1790	2
TMEM38A	6	0.21942	0.39994	0.999911	6724	2	0.029749	0.093026	0.913756	1745	2
BRD3	6	0.2259	0.40713	0.999911	6823	3	0.030488	0.094958	0.913756	1786	2
KCNIP3	6	0.2772	0.46344	0.999911	7731	2	0.029133	0.091376	0.913756	1720	4
LTB	5	0.27825	0.46462	0.999911	7753	1	0.030955	0.096217	0.913756	1806	2
FUBP1	6	0.28449	0.47133	0.999911	7857	2	0.02898	0.090972	0.913756	1714	3
LRRC14B	6	0.29966	0.48729	0.999911	8094	3	0.03103	0.096421	0.913756	1809	2
POP4	6	0.30173	0.48945	0.999911	8134	2	0.030712	0.095552	0.913756	1797	3
ATP1A4	6	0.32011	0.50808	0.999911	8442	1	0.031478	0.097628	0.913756	1839	3
SBNO2	6	0.32131	0.50929	0.999911	8465	3	0.030966	0.096246	0.913756	1808	2
ATG16L2	6	0.32496	0.51302	0.999911	8544	2	0.030229	0.094329	0.913756	1773	4
TTLL2	6	0.34578	0.53377	0.999911	8865	2	0.03039	0.094734	0.913756	1783	4
CAMK2B	6	0.36741	0.55481	0.999911	9223	2	0.030207	0.094262	0.913756	1769	4
ZDHHC13	5	0.38162	0.56854	0.999911	9443	2	0.030367	0.094679	0.913756	1781	3
GRID2	6	0.4038	0.59001	0.999911	9783	2	0.031405	0.097429	0.913756	1833	4
OCA2	6	0.4156	0.60141	0.999911	9999	1	0.031222	0.096954	0.913756	1820	2
ATG4B	6	0.41642	0.60216	0.999911	10007	1	0.028969	0.090952	0.913756	1713	5
IDH3A	6	0.43134	0.61509	0.999911	10220	2	0.029621	0.092681	0.913756	1739	4
PCYT2	6	0.44047	0.62113	0.999911	10319	1	0.029085	0.091255	0.913756	1718	3
CHD9	6	0.44169	0.6219	0.999911	10338	1	0.030838	0.095898	0.913756	1802	3
TMIGD2	6	0.44686	0.62529	0.999911	10389	1	0.0308	0.095796	0.913756	1800	5
STXBP5L	6	0.4539	0.6299	0.999911	10462	2	0.030029	0.093804	0.913756	1760	3
TMPRSS7	6	0.46666	0.63824	0.999911	10611	1	0.03	0.093729	0.913756	1757	4
HSH2D	6	0.4857	0.65089	0.999911	10844	2	0.030011	0.093762	0.913756	1759	4
LMX1A	6	0.49227	0.65529	0.999911	10927	2	0.031404	0.097428	0.913756	1832	3
C6orf62	5	0.49584	0.65774	0.999911	10957	1	0.031228	0.096975	0.913756	1821	3
BTBD3	5	0.50205	0.66181	0.999911	11028	2	0.031353	0.09729	0.913756	1828	3
APH1B	6	0.51066	0.66728	0.999911	11116	2	0.030048	0.093847	0.913756	1761	3
OVOL2	6	0.51636	0.67097	0.999911	11185	2	0.029813	0.093209	0.913756	1749	3
DENND5B	6	0.53209	0.6811	0.999911	11363	1	0.030533	0.095077	0.913756	1789	5
SEMA4A	6	0.54625	0.6904	0.999911	11519	2	0.029045	0.091143	0.913756	1717	4
COL11A2	6	0.58691	0.71718	0.999911	11987	2	0.031519	0.097736	0.913756	1842	3
CAPSL	2	0.58691	0.71718	0.999911	11988	1	0.031494	0.097672	0.913756	1841	1
GRK5	6	0.60977	0.73273	0.999911	12262	2	0.031336	0.097247	0.913756	1827	3
SLC22A23	6	0.61969	0.73961	0.999911	12369	1	0.031286	0.097116	0.913756	1824	2
SORCS3	6	0.62118	0.74065	0.999911	12386	2	0.030582	0.095202	0.913756	1792	3
ARHGEF7	6	0.6213	0.74074	0.999911	12387	2	0.030774	0.095724	0.913756	1799	2
ABCD2	6	0.62224	0.74135	0.999911	12398	1	0.029732	0.092979	0.913756	1744	4
PTK7	6	0.62438	0.74282	0.999911	12441	1	0.029874	0.093392	0.913756	1752	4
GZMA	5	0.62727	0.74487	0.999911	12473	1	0.031359	0.097308	0.913756	1829	3
FUT9	4	0.63728	0.75176	0.999911	12610	1	0.030096	0.093972	0.913756	1764	2
MESDC2	6	0.63774	0.75207	0.999911	12614	1	0.031267	0.09707	0.913756	1823	4
SEL1L3	6	0.67634	0.77796	0.999911	13066	1	0.029685	0.09285	0.913756	1742	2
ZNF620	4	0.67684	0.77829	0.999911	13075	1	0.02987	0.093375	0.913756	1751	2
PAM16	6	0.6842	0.78328	0.999911	13166	2	0.030216	0.094287	0.913756	1770	2
SLC41A3	6	0.68422	0.78328	0.999911	13167	1	0.029305	0.091859	0.913756	1731	5
MAP3K8	6	0.68826	0.78598	0.999911	13213	2	0.029429	0.092189	0.913756	1733	2
luciferase	24	0.69557	0.79109	0.999911	13289	7	0.029042	0.091134	0.913756	1715	12
LENG1	6	0.70239	0.79588	0.999911	13375	1	0.03152	0.09774	0.913756	1843	5
H1FX	5	0.7031	0.79636	0.999911	13389	1	0.031526	0.097753	0.913756	1844	4
C1orf127	6	0.70423	0.79714	0.999911	13404	2	0.030242	0.094363	0.913756	1774	3
TNNC2	6	0.74326	0.82535	0.999911	13891	2	0.031175	0.096818	0.913756	1817	3
TRPC4AP	6	0.74444	0.82622	0.999911	13911	2	0.030138	0.094079	0.913756	1766	2
PRSS48	6	0.74933	0.82832	0.999911	13947	1	0.029177	0.091506	0.913756	1723	4
TMEM59	6	0.79862	0.85003	0.999911	14326	1	0.030068	0.093904	0.913756	1762	5
IGFBPL1	6	0.82532	0.86335	0.999911	14552	1	0.030454	0.094871	0.913756	1785	3
SS18	6	0.84049	0.87139	0.999911	14710	1	0.030903	0.096085	0.913756	1803	3
PAQR3	6	0.84141	0.87189	0.999911	14722	1	0.030376	0.094702	0.913756	1782	4
ABCB11	6	0.84594	0.87438	0.999911	14774	1	0.029964	0.093629	0.913756	1756	5
STMN3	5	0.84662	0.87476	0.999911	14782	1	0.029759	0.093063	0.913756	1747	4
SLC35D3	6	0.85191	0.87772	0.999911	14838	1	0.030765	0.095696	0.913756	1798	5
FAM65C	6	0.86025	0.8825	0.999911	14923	1	0.029683	0.092843	0.913756	1741	5
ZNF35	5	0.86553	0.88562	0.999911	14975	1	0.031394	0.097402	0.913756	1831	3
NKRF	5	0.87437	0.891	0.999911	15063	1	0.031459	0.097579	0.913756	1838	3
EXT1	6	0.87842	0.89349	0.999911	15117	1	0.03096	0.096236	0.913756	1807	5
WAS	6	0.88272	0.89617	0.999911	15169	1	0.029716	0.092939	0.913756	1743	5
C5orf52	6	0.8933	0.90317	0.999911	15293	1	0.031185	0.096848	0.913756	1818	5
GAL3ST4	6	0.89757	0.90609	0.999911	15367	1	0.030507	0.095012	0.913756	1787	5
PAFAH1B3	6	0.89884	0.90697	0.999911	15381	1	0.030332	0.09459	0.913756	1778	4
PTGFR	5	0.90398	0.91057	0.999911	15452	1	0.029502	0.092375	0.913756	1735	4
CCDC124	6	0.91568	0.91932	0.999911	15612	1	0.029188	0.091532	0.913756	1725	5
CLIC6	6	0.92677	0.92842	0.999911	15768	1	0.031094	0.096605	0.913756	1815	1
FOXRED1	6	0.92998	0.93113	0.999911	15823	1	0.031049	0.096469	0.913756	1812	5
SAP30BP	6	0.93486	0.93542	0.999911	15910	1	0.029108	0.091318	0.913756	1719	3
SERPIND1	6	0.93731	0.93762	0.999911	15957	1	0.029215	0.091612	0.913756	1727	2
GRIK1	6	0.93999	0.94004	0.999911	15998	1	0.02956	0.092526	0.913756	1736	3
FAM78B	6	0.94304	0.94298	0.999911	16052	1	0.031441	0.097534	0.913756	1836	5
TOR1AIP2	6	0.94452	0.94441	0.999911	16080	1	0.03022	0.094301	0.913756	1771	5
ATAD2	6	0.94673	0.94656	0.999911	16125	0	0.031487	0.09765	0.913756	1840	5
EXD1	6	0.94899	0.94887	0.999911	16164	0	0.031458	0.097578	0.913756	1837	5
NTN4	6	0.95013	0.95	0.999911	16186	0	0.028945	0.090887	0.913756	1712	5
MFAP3	6	0.95754	0.95731	0.999911	16314	0	0.029386	0.092068	0.913756	1732	5
RGS7BP	6	0.95855	0.95832	0.999911	16333	0	0.030091	0.093962	0.913756	1763	4
ANO1	6	0.96061	0.96037	0.999911	16377	0	0.030353	0.094643	0.913756	1779	5
CHRM2	4	0.96151	0.96126	0.999911	16387	0	0.029758	0.093062	0.913756	1746	3
LCN9	6	0.96195	0.96169	0.999911	16400	0	0.030566	0.095162	0.913756	1791	4
IQCG	6	0.96617	0.96597	0.999911	16506	0	0.031313	0.097184	0.913756	1825	5
RFWD2	2	0.96891	0.96876	0.999911	16563	0	0.031089	0.096587	0.913756	1814	2
SULT1B1	3	0.96895	0.96881	0.999911	16565	0	0.031048	0.096467	0.913756	1810	3
BBIP1	3	0.96895	0.96881	0.999911	16564	0	0.031048	0.096467	0.913756	1811	3
FAM71C	3	0.96948	0.96932	0.999911	16574	0	0.030524	0.09505	0.913756	1788	3
JTB	1	0.96961	0.96945	0.999911	16576	0	0.030393	0.094739	0.913756	1784	1
CNBD1	3	0.97074	0.97057	0.999911	16600	0	0.029255	0.091721	0.913756	1728	3
C17orf112	1	0.97081	0.97065	0.999911	16601	0	0.029189	0.091534	0.913756	1726	1
ENHO	2	0.97084	0.97069	0.999911	16603	0	0.029158	0.091454	0.913756	1721	2
MAPK3	6	0.97282	0.97268	0.999911	16640	0	0.030203	0.09425	0.913756	1767	2
MREG	4	0.97354	0.97337	0.999911	16665	0	0.030254	0.094402	0.913756	1775	3
IQCF3	5	0.97572	0.97556	0.999911	16706	0	0.02965	0.09276	0.913756	1740	4
SCG3	5	0.97592	0.97576	0.999911	16713	0	0.030675	0.095444	0.913756	1795	4
MEX3A	6	0.97867	0.97854	0.999911	16747	0	0.030008	0.093754	0.913756	1758	5
SPATA6	6	0.98615	0.98606	0.999911	16923	0	0.030136	0.094073	0.913756	1765	5
KIAA2022	5	0.98871	0.98865	0.999911	16981	0	0.031328	0.097227	0.913756	1826	4
HSPB8	5	0.99023	0.9902	0.999911	17016	0	0.029273	0.091771	0.913756	1729	4
DENND2A	6	0.9918	0.99178	0.999911	17053	0	0.029184	0.091522	0.913756	1724	5
DCTPP1	6	0.99626	0.99628	0.999911	17154	0	0.031193	0.096868	0.913756	1819	5
SPATA6L	6	0.10914	0.24838	0.982777	4353	4	0.031685	0.098179	0.915032	1849	2
APOB	6	0.21894	0.39939	0.999911	6716	2	0.031734	0.098311	0.915032	1851	3
ADPRM	6	0.2787	0.46507	0.999911	7761	2	0.031606	0.097962	0.915032	1845	3
H6PD	6	0.37505	0.56223	0.999911	9344	1	0.031662	0.098114	0.915032	1847	5
DLL3	6	0.44584	0.62459	0.999911	10379	2	0.03167	0.098135	0.915032	1848	4
DPY19L1	2	0.59287	0.72113	0.999911	12060	1	0.031731	0.0983	0.915032	1850	1
YTHDC2	6	0.7715	0.83771	0.999911	14097	1	0.031641	0.098062	0.915032	1846	5
NXF3	6	0.86039	0.88259	0.999911	14926	1	0.031735	0.098314	0.915032	1852	3
PIGN	6	0.34873	0.53668	0.999911	8928	3	0.031757	0.098371	0.915067	1853	3
PTS	6	0.11597	0.26023	0.984019	4552	3	0.031823	0.098544	0.915687	1855	3
TNKS2	6	0.8035	0.85239	0.999911	14368	1	0.031822	0.098542	0.915687	1854	4
TJP1	6	0.058476	0.15577	0.948002	2831	2	0.031967	0.098953	0.915762	1861	3
RERE	6	0.56591	0.70329	0.999911	11735	2	0.031862	0.098663	0.915762	1856	1
L3MBTL4	6	0.60376	0.72859	0.999911	12186	2	0.031876	0.098702	0.915762	1857	4
SLC17A4	6	0.72647	0.81309	0.999911	13666	2	0.032018	0.099083	0.915762	1865	3
TSKS	6	0.74399	0.82588	0.999911	13904	2	0.03199	0.099013	0.915762	1863	2
STX16	5	0.82161	0.86146	0.999911	14518	1	0.031916	0.098808	0.915762	1859	4
FGFR2	6	0.89573	0.90484	0.999911	15341	1	0.032008	0.099057	0.915762	1864	3
DEFB113	3	0.96802	0.96786	0.999911	16543	0	0.031981	0.098991	0.915762	1862	3
C2orf40	2	0.96805	0.96791	0.999911	16544	0	0.031946	0.098883	0.915762	1860	2
EDEM2	6	0.99189	0.99186	0.999911	17055	0	0.031914	0.098802	0.915762	1858	5
PHF19	6	0.07796	0.19311	0.96654	3435	3	0.032069	0.099232	0.915887	1867	3
RHOBTB3	6	0.5389	0.68555	0.999911	11437	2	0.032053	0.099187	0.915887	1866	3
CLN6	6	0.65277	0.76211	0.999911	12787	2	0.032117	0.099362	0.915887	1870	4
C2orf88	2	0.96789	0.96774	0.999911	16539	0	0.032109	0.099339	0.915887	1869	2
PNMAL1	6	0.99694	0.99695	0.999911	17166	0	0.03208	0.099268	0.915887	1868	5
VRK3	6	0.0013462	0.0060602	0.552304	187	3	0.032373	0.10003	0.91603	1876	3
GRIN2B	6	0.033423	0.10303	0.907325	1951	4	0.032309	0.099864	0.91603	1875	1
DSCAM	6	0.072774	0.18344	0.96654	3263	4	0.032629	0.10062	0.91603	1892	2
SH3PXD2A	6	0.10671	0.24416	0.982777	4273	2	0.032646	0.10066	0.91603	1894	3
MCM2	6	0.16778	0.34189	0.999911	5803	3	0.032527	0.1004	0.91603	1885	3
PTBP2	6	0.26924	0.45495	0.999911	7600	1	0.032529	0.10041	0.91603	1886	4
DUOX1	6	0.31935	0.50731	0.999911	8422	3	0.03238	0.10005	0.91603	1877	3
GABRB3	6	0.39435	0.58094	0.999911	9628	2	0.03246	0.10026	0.91603	1880	4
RASSF8	6	0.50141	0.66139	0.999911	11023	2	0.032565	0.10049	0.91603	1887	2
DCBLD1	6	0.59912	0.72536	0.999911	12134	2	0.03258	0.10052	0.91603	1889	3
TNFSF4	5	0.60554	0.72981	0.999911	12203	1	0.032632	0.10062	0.91603	1893	2
SDPR	6	0.65983	0.76684	0.999911	12861	2	0.032508	0.10036	0.91603	1883	4
DNASE1	6	0.69771	0.79261	0.999911	13319	2	0.032671	0.10071	0.91603	1895	4
PROX2	6	0.8352	0.86855	0.999911	14653	1	0.032422	0.10016	0.91603	1878	5
MAGEH1	3	0.88012	0.89455	0.999911	15135	0	0.03251	0.10037	0.91603	1884	2
OLFM3	5	0.8861	0.8983	0.999911	15209	1	0.032279	0.099787	0.91603	1873	3
CYP2B6	3	0.90203	0.90919	0.999911	15423	0	0.032232	0.099659	0.91603	1871	2
DUSP16	6	0.90297	0.90986	0.999911	15434	1	0.032593	0.10055	0.91603	1890	4
PRSS21	6	0.92967	0.93086	0.999911	15817	1	0.032501	0.10035	0.91603	1882	3
ATP2B2	6	0.93956	0.93964	0.999911	15991	1	0.032452	0.10024	0.91603	1879	3
OVGP1	6	0.95337	0.95319	0.999911	16242	0	0.032251	0.099712	0.91603	1872	3
EIF3J	1	0.96754	0.96737	0.999911	16533	0	0.032463	0.10026	0.91603	1881	1
NCAM2	6	0.96868	0.96852	0.999911	16557	0	0.032623	0.10061	0.91603	1891	4
KIR3DL3	5	0.97937	0.97929	0.999911	16762	0	0.032568	0.1005	0.91603	1888	4
NQO1	6	0.99363	0.99359	0.999911	17095	0	0.032295	0.09983	0.91603	1874	5
PLIN4	6	0.10108	0.23435	0.982361	4112	3	0.032754	0.10091	0.916486	1897	3
KIF3A	6	0.39192	0.57856	0.999911	9598	3	0.032757	0.10092	0.916486	1898	2
MAP4K1	6	0.97095	0.9708	0.999911	16606	0	0.032739	0.10089	0.916486	1896	4
CXCL16	6	0.98997	0.98994	0.999911	17009	0	0.032782	0.10097	0.916504	1899	3
ATP6V0D2	6	0.13731	0.29601	0.992347	5140	1	0.032813	0.10104	0.916678	1900	4
NKX6-1	6	0.17539	0.35053	0.999911	5932	2	0.032884	0.1012	0.917618	1901	1
POU3F1	3	0.43219	0.61566	0.999911	10231	1	0.032991	0.10143	0.918373	1903	2
LCAT	6	0.62769	0.74514	0.999911	12482	2	0.033014	0.10148	0.918373	1904	4
ESX1	6	0.6765	0.77806	0.999911	13069	2	0.032988	0.10142	0.918373	1902	4
PNPLA1	6	0.99097	0.99098	0.999911	17034	0	0.033024	0.1015	0.918373	1905	4
ANKRD33B	6	0.00030385	0.0014449	0.370923	67	2	0.045793	0.12863	0.918401	2402	4
GALNT9	6	0.0019329	0.0085893	0.59326	249	4	0.041352	0.1194	0.918401	2229	2
FRMPD2	6	0.0024613	0.010787	0.622924	296	2	0.038748	0.11385	0.918401	2127	3
CD109	6	0.0026319	0.011477	0.63767	308	3	0.042746	0.12233	0.918401	2280	2
ALKBH8	6	0.0029862	0.012917	0.640384	339	2	0.036435	0.10886	0.918401	2033	4
IKBKE	6	0.0055194	0.021824	0.742857	499	5	0.045278	0.12754	0.918401	2387	1
SLC22A4	6	0.010499	0.03766	0.802847	804	3	0.04622	0.12953	0.918401	2418	3
FAM194B	6	0.011884	0.041869	0.814273	885	4	0.045699	0.12843	0.918401	2399	2
CELSR2	6	0.014141	0.048754	0.830406	1012	2	0.045543	0.12808	0.918401	2395	4
GNG4	3	0.015084	0.051597	0.839048	1059	1	0.04827	0.13376	0.918401	2509	2
CPS1	6	0.018193	0.0608	0.865372	1201	3	0.046352	0.1298	0.918401	2423	3
MTOR	6	0.018418	0.061453	0.865372	1211	4	0.034385	0.10452	0.918401	1957	1
ACOT8	6	0.019174	0.063572	0.865372	1259	4	0.033906	0.10347	0.918401	1939	1
GPX3	6	0.020099	0.066292	0.872339	1307	3	0.038875	0.11413	0.918401	2133	1
C3orf22	6	0.020555	0.067642	0.872339	1331	2	0.039638	0.11572	0.918401	2155	2
TMEM44	6	0.020884	0.068585	0.872339	1348	4	0.048875	0.13503	0.918401	2530	1
CCBE1	6	0.022035	0.071838	0.872339	1405	3	0.039943	0.11636	0.918401	2169	3
CDA	6	0.022178	0.072224	0.872339	1413	3	0.046731	0.13058	0.918401	2436	3
HAPLN2	6	0.02249	0.073065	0.872339	1434	2	0.041378	0.11945	0.918401	2230	4
OR5P3	4	0.022787	0.073881	0.872339	1450	3	0.043109	0.12305	0.918401	2301	1
PARP12	6	0.023325	0.075388	0.872339	1477	1	0.038823	0.11402	0.918401	2129	4
ESPN	5	0.023618	0.07619	0.872339	1488	2	0.048658	0.1346	0.918401	2522	3
SH3GL1	6	0.023692	0.076395	0.872339	1494	3	0.041529	0.11976	0.918401	2235	3
KLK8	6	0.024484	0.078561	0.872597	1547	3	0.036821	0.10967	0.918401	2056	3
FMR1NB	6	0.029108	0.091385	0.891456	1767	1	0.036673	0.10934	0.918401	2049	2
PKN3	6	0.03069	0.09562	0.898914	1828	4	0.040844	0.11829	0.918401	2212	1
ACTC1	5	0.031017	0.096498	0.898914	1842	4	0.04576	0.12856	0.918401	2400	1
C5orf24	5	0.033776	0.10399	0.907325	1970	2	0.038672	0.11368	0.918401	2124	3
EMC3	2	0.03425	0.10527	0.907325	1996	1	0.039774	0.11599	0.918401	2160	1
IRGC	5	0.037399	0.11235	0.915184	2116	2	0.03324	0.10199	0.918401	1910	3
NXNL2	6	0.038497	0.11462	0.917114	2154	4	0.049127	0.13553	0.918401	2541	1
RHBDL2	6	0.039914	0.11766	0.920219	2204	2	0.044317	0.12552	0.918401	2350	2
KCNJ1	5	0.040051	0.11796	0.920521	2208	1	0.045338	0.12766	0.918401	2390	2
POLM	6	0.041378	0.12079	0.924128	2250	2	0.03531	0.1065	0.918401	1996	2
USP43	6	0.041605	0.12127	0.924128	2261	2	0.045879	0.12881	0.918401	2407	4
HPS6	6	0.041614	0.12129	0.924128	2262	4	0.043524	0.1239	0.918401	2316	2
PCDH17	6	0.044786	0.12788	0.929999	2368	3	0.033843	0.10333	0.918401	1936	2
ZNF814	4	0.047931	0.13441	0.932898	2470	2	0.042643	0.12209	0.918401	2277	2
RSPH6A	6	0.048073	0.13468	0.932898	2477	4	0.039384	0.11519	0.918401	2148	2
CLUH	6	0.048434	0.13543	0.932898	2499	2	0.045594	0.12819	0.918401	2396	4
HOGA1	6	0.04867	0.13592	0.932898	2508	2	0.034165	0.10405	0.918401	1948	4
HHATL	6	0.048781	0.13613	0.933209	2514	3	0.04319	0.12321	0.918401	2305	2
GBP4	5	0.04891	0.13642	0.933209	2517	2	0.045655	0.12832	0.918401	2397	2
AGAP1	6	0.049757	0.13817	0.933209	2551	2	0.043043	0.12292	0.918401	2296	3
ITGA9	6	0.05032	0.13928	0.934199	2568	2	0.043369	0.12357	0.918401	2312	4
ABCA6	6	0.054654	0.14806	0.935506	2726	3	0.04154	0.11979	0.918401	2238	3
TNNI2	5	0.059185	0.15714	0.949771	2848	3	0.045813	0.12868	0.918401	2404	1
SLC37A3	6	0.059688	0.15818	0.952466	2859	4	0.033493	0.10253	0.918401	1920	2
C14orf166B	6	0.061783	0.16231	0.955421	2927	2	0.043802	0.12446	0.918401	2327	3
B4GALNT4	6	0.06595	0.17042	0.962037	3053	1	0.04842	0.13411	0.918401	2515	4
ECEL1	6	0.066556	0.17161	0.964148	3068	4	0.042176	0.12108	0.918401	2261	1
C17orf102	5	0.067688	0.17375	0.964202	3095	2	0.035175	0.10622	0.918401	1988	3
BAZ2B	6	0.067872	0.17409	0.964202	3105	2	0.033533	0.10262	0.918401	1923	2
MAPK15	6	0.068747	0.1758	0.964202	3134	3	0.034608	0.10499	0.918401	1965	2
IMPG1	6	0.072325	0.18257	0.96654	3246	1	0.048056	0.13332	0.918401	2492	2
CNGA1	5	0.072835	0.18355	0.96654	3266	3	0.046235	0.12956	0.918401	2419	2
FBXW2	6	0.073649	0.18507	0.96654	3293	3	0.038367	0.11302	0.918401	2113	1
ADCYAP1	6	0.074175	0.18605	0.96654	3309	2	0.039165	0.11473	0.918401	2140	4
CPXM2	6	0.074247	0.18619	0.96654	3310	2	0.034546	0.10486	0.918401	1963	4
ZNF256	5	0.075085	0.18783	0.96654	3333	1	0.033223	0.10194	0.918401	1909	4
ALKBH6	6	0.07676	0.19095	0.96654	3392	3	0.046857	0.13084	0.918401	2444	1
PMS2	2	0.077721	0.19267	0.96654	3426	1	0.049364	0.136	0.918401	2552	1
KCNH6	6	0.082235	0.20083	0.97112	3559	2	0.035006	0.10584	0.918401	1981	4
POM121L12	5	0.083133	0.20241	0.97112	3591	1	0.034654	0.1051	0.918401	1967	4
LAMB4	6	0.085563	0.20681	0.974754	3651	3	0.0416	0.11989	0.918401	2241	3
HSPBP1	6	0.085698	0.20705	0.974754	3659	2	0.047614	0.13241	0.918401	2477	3
MAPK1	6	0.086369	0.20831	0.97582	3678	2	0.047488	0.13213	0.918401	2471	3
PDSS2	6	0.088195	0.2116	0.975834	3737	1	0.045965	0.12899	0.918401	2410	3
PNLIPRP2	6	0.088743	0.21258	0.976168	3746	2	0.04591	0.12888	0.918401	2408	3
C4orf19	5	0.088802	0.21269	0.976168	3749	3	0.040157	0.11683	0.918401	2184	2
PKN1	6	0.089688	0.21425	0.976168	3774	2	0.04793	0.13307	0.918401	2487	2
BSPRY	6	0.090869	0.21632	0.976168	3811	3	0.036712	0.10942	0.918401	2052	1
ESYT3	6	0.092264	0.2188	0.976168	3861	3	0.046135	0.12933	0.918401	2416	3
HSD17B3	6	0.092735	0.21963	0.976168	3874	4	0.045847	0.12875	0.918401	2406	1
CBLN3	6	0.095411	0.22439	0.976966	3958	2	0.044139	0.12517	0.918401	2340	3
MZF1	6	0.099314	0.23125	0.981308	4058	2	0.037349	0.11077	0.918401	2075	4
AMN	6	0.10076	0.23377	0.981601	4105	2	0.047081	0.13131	0.918401	2448	4
CLCNKA	6	0.1033	0.23821	0.982554	4177	2	0.043815	0.12449	0.918401	2329	4
RASGRP4	6	0.10431	0.24002	0.98271	4206	4	0.03504	0.10592	0.918401	1982	2
PRAM1	6	0.10488	0.24098	0.982777	4220	3	0.043316	0.12346	0.918401	2309	3
CD8A	6	0.10847	0.24722	0.982777	4323	4	0.037285	0.11065	0.918401	2073	1
SLC7A11	6	0.10877	0.24776	0.982777	4338	4	0.041415	0.11952	0.918401	2231	2
ANTXR2	6	0.1114	0.25232	0.982777	4423	4	0.036757	0.10952	0.918401	2054	2
KIAA1467	6	0.11529	0.25903	0.984019	4534	2	0.044173	0.12523	0.918401	2342	3
C6orf52	5	0.11685	0.26175	0.984268	4581	3	0.036744	0.10949	0.918401	2053	2
MAGEB18	5	0.1173	0.2625	0.984268	4591	2	0.038271	0.11281	0.918401	2109	2
FABP6	6	0.12299	0.27213	0.986119	4754	3	0.036089	0.10811	0.918401	2014	3
CYP4F11	6	0.12324	0.27251	0.986194	4763	3	0.048938	0.13516	0.918401	2532	3
GBA2	6	0.12417	0.27409	0.987115	4783	2	0.039018	0.11443	0.918401	2136	4
GZF1	6	0.1248	0.27514	0.987273	4802	1	0.040176	0.11686	0.918401	2185	3
RNF128	6	0.12532	0.27602	0.98731	4818	3	0.041816	0.12034	0.918401	2246	3
RASSF7	6	0.12611	0.27732	0.98761	4833	2	0.047198	0.13158	0.918401	2456	3
SPATA31D1	6	0.12738	0.27951	0.98761	4876	1	0.049002	0.13527	0.918401	2536	4
SLC6A7	6	0.12753	0.27975	0.98761	4880	2	0.038509	0.11333	0.918401	2118	4
[truncated: 15,238 more rows]

## Sheet: RPE
id	num	neg|score	neg|p-value	neg|fdr	neg|rank	neg|goodsgrna	pos|score	pos|p-value	pos|fdr	pos|rank	pos|goodsgrna
AHR	6	1	1	1	17237	0	2.3041e-12	2.872e-07	0.00495	1	6
KEAP1	6	0.95213	0.95209	1	16143	0	5.7061e-08	8.616e-07	0.007426	2	5
TAOK1	6	0.89403	0.90111	1	15134	1	1.9529e-07	2.0104e-06	0.011551	3	5
PARP1	6	0.99999	1	1	17236	0	5.3355e-06	2.8433e-05	0.10198	4	6
PDCD10	4	0.99999	0.99999	1	17235	0	5.8156e-06	2.9582e-05	0.10198	5	4
ARHGAP29	6	0.70517	0.79568	1	13156	1	8.2211e-06	4.107e-05	0.117987	6	4
NF2	6	0.33883	0.52393	1	8413	1	1.495e-05	6.979e-05	0.16646	7	5
SNRPD2	1	0.99998	0.99999	1	17234	0	1.6426e-05	7.7257e-05	0.16646	8	1
NPC1	6	0.85789	0.87699	1	14680	1	2.7237e-05	0.00012953	0.240774	9	5
L3MBTL3	6	0.99058	0.99046	1	17000	0	3.1638e-05	0.00015021	0.240774	10	5
LRWD1	6	0.12014	0.26604	1	4389	3	3.2851e-05	0.00015365	0.240774	11	2
CBL	6	0.4968	0.65037	1	10542	1	4.0763e-05	0.00019788	0.284241	12	4
KCNK10	6	0.99996	0.99996	1	17233	0	4.4234e-05	0.00021741	0.288271	13	6
MPDZ	6	0.99994	0.99995	1	17232	0	5.7224e-05	0.00028117	0.315285	14	6
HOXC10	5	0.99994	0.99995	1	17231	0	5.747e-05	0.00028174	0.315285	15	5
ITGB1	6	0.84327	0.8682	1	14510	1	5.9879e-05	0.00029266	0.315285	16	5
EPS8L1	6	0.90578	0.91004	1	15304	1	7.1173e-05	0.00034263	0.347408	17	5
AIM1L	6	0.9993	0.99931	1	17215	0	8.0661e-05	0.00037939	0.354091	18	6
MSX2	3	0.88494	0.89455	1	15007	0	8.4494e-05	0.00039031	0.354091	19	2
FAP	6	0.95719	0.95714	1	16264	0	9.067e-05	0.00042305	0.355842	20	5
TRPC4	6	0.9999	0.9999	1	17230	0	9.9125e-05	0.00046555	0.355842	21	6
MSR1	6	0.99058	0.99045	1	16999	0	9.9229e-05	0.00046555	0.355842	22	5
NDFIP1	5	0.51564	0.66289	1	10756	1	0.00010159	0.00047532	0.355842	23	4
SLC18B1	4	0.99989	0.99988	1	17229	0	0.00010694	0.000496	0.355842	24	4
CRYL1	6	0.69888	0.79108	1	13058	1	0.00010993	0.0005161	0.355842	25	4
SMCO2	4	0.98528	0.98518	1	16871	0	0.00012885	0.00061835	0.409939	26	4
KRT80	6	0.9988	0.99882	1	17201	0	0.0001433	0.00068498	0.416254	27	6
GBA2	6	0.98961	0.98949	1	16982	0	0.00014942	0.00071427	0.416254	28	5
CAMKMT	5	0.29515	0.47885	1	7659	1	0.00015805	0.00074701	0.416254	29	4
STEAP3	6	0.079952	0.19457	1	3337	2	0.00015819	0.00074701	0.416254	30	4
PLA2G6	6	0.039257	0.11373	0.917647	2133	2	0.00016425	0.00077803	0.416254	31	3
MCCC2	6	0.98351	0.98345	1	16827	0	0.00017852	0.00084409	0.416254	32	5
RAPGEF3	6	0.99982	0.99981	1	17228	0	0.00017964	0.0008504	0.416254	33	6
SNTG1	6	0.99982	0.9998	1	17227	0	0.00018272	0.00086362	0.416254	34	6
THSD7B	6	0.99292	0.99279	1	17060	0	0.00018304	0.00086706	0.416254	35	5
FAM5C	6	0.99982	0.9998	1	17226	0	0.00018393	0.00086936	0.416254	36	6
RAP2B	3	0.98248	0.98241	1	16804	0	0.00020799	0.00097907	0.446873	37	3
FRYL	6	0.96772	0.96769	1	16487	0	0.00021798	0.0010325	0.446873	38	4
HPDL	6	0.99512	0.99505	1	17114	0	0.00021942	0.0010388	0.446873	39	5
SPRY2	6	0.96537	0.96534	1	16436	0	0.0002208	0.001048	0.446873	40	3
DUSP2	6	0.99836	0.99837	1	17190	0	0.00022488	0.0010629	0.446873	41	6
SLC2A5	6	0.045612	0.12717	0.94066	2327	4	0.00022994	0.0010899	0.447313	42	2
FAM195B	6	0.47437	0.63534	1	10292	1	0.00024379	0.0011502	0.455352	43	4
CACNA1H	6	0.98544	0.98535	1	16877	0	0.00025044	0.0011801	0.455352	44	5
GAS6	6	0.99974	0.99973	1	17225	0	0.00026277	0.0012353	0.455352	45	6
TCF20	6	0.94632	0.9463	1	16016	0	0.00026752	0.0012611	0.455352	46	5
HHIP	6	0.99972	0.99972	1	17224	0	0.00028275	0.0013183	0.455352	47	6
N4BP1	6	0.98392	0.98386	1	16835	0	0.00029205	0.0013656	0.455352	48	4
ERBB2IP	6	0.83848	0.86543	1	14450	1	0.00029255	0.0013674	0.455352	49	4
ANKRD42	6	0.98785	0.98778	1	16941	0	0.00029563	0.0013817	0.455352	50	3
SHANK2	6	0.9173	0.91937	1	15485	1	0.00029787	0.0013955	0.455352	51	5
GLTSCR1	6	0.074082	0.18368	1	3149	3	0.00029804	0.0013961	0.455352	52	3
LDLRAD2	6	0.9997	0.9997	1	17223	0	0.00029931	0.0014001	0.455352	53	6
SLC2A9	6	0.99968	0.99968	1	17222	0	0.00031563	0.0014639	0.463829	54	6
KIAA0195	6	0.065634	0.16771	0.987301	2928	3	0.00032313	0.0015069	0.463829	55	3
HSPA2	6	0.88334	0.89348	1	14982	1	0.00033104	0.0015466	0.463829	56	3
CHEK2	6	0.99966	0.99967	1	17221	0	0.0003357	0.0015655	0.463829	57	6
HSF1	6	0.91482	0.91731	1	15447	1	0.00034687	0.001623	0.463829	58	3
CXorf24	4	0.21565	0.39046	1	6264	1	0.00034969	0.0016345	0.463829	59	3
AES	6	0.38007	0.56485	1	9067	2	0.00035394	0.0016563	0.463829	60	4
INHBB	6	0.67831	0.77613	1	12773	1	0.00035582	0.0016672	0.463829	61	4
MOB1A	1	0.99964	0.99965	1	17220	0	0.00035589	0.0016684	0.463829	62	1
MIS18BP1	6	0.037601	0.11014	0.911393	2083	4	0.00036131	0.0016971	0.464325	63	1
MSLNL	6	0.10051	0.23184	1	3895	1	0.00042439	0.0019906	0.530312	64	5
CEBPZ	6	0.013492	0.046552	0.716628	1119	3	0.00042699	0.0019998	0.530312	65	2
CAB39	3	0.9851	0.985	1	16864	0	0.00048038	0.002241	0.550804	66	3
SUSD5	6	0.39964	0.58443	1	9409	1	0.0004918	0.002291	0.550804	67	5
LCMT2	6	0.80581	0.84769	1	14090	1	0.00049267	0.0022945	0.550804	68	4
HECTD3	6	0.79947	0.84454	1	14038	1	0.00050967	0.002372	0.550804	69	3
DNMBP	6	0.93633	0.93639	1	15831	1	0.00052565	0.0024323	0.550804	70	4
PASD1	6	0.99947	0.99948	1	17219	0	0.00052776	0.0024438	0.550804	71	6
CALN1	6	0.99203	0.99192	1	17037	0	0.0005293	0.0024501	0.550804	72	5
ABHD8	6	0.23785	0.41585	1	6643	3	0.00053061	0.0024547	0.550804	73	3
ADAM10	6	0.94872	0.94868	1	16067	0	0.00053409	0.0024691	0.550804	74	5
KLHDC7A	6	0.4056	0.58891	1	9498	1	0.00053633	0.0024817	0.550804	75	5
NKX2-2	6	0.95681	0.95678	1	16257	0	0.00053919	0.0024903	0.550804	76	5
PTPN12	6	0.26127	0.44246	1	7061	2	0.00054221	0.0025064	0.550804	77	3
PKN1	6	0.96436	0.96436	1	16415	0	0.00054477	0.0025156	0.550804	78	5
BHLHA9	6	0.91021	0.91357	1	15369	1	0.00055001	0.0025432	0.550804	79	4
UAP1L1	6	0.99839	0.9984	1	17191	0	0.00055222	0.0025564	0.550804	80	6
STRIP2	6	0.99942	0.99944	1	17218	0	0.00057695	0.0026713	0.568451	81	6
TPBG	6	0.99941	0.99943	1	17217	0	0.00059008	0.0027201	0.571782	82	6
MARVELD3	6	0.92063	0.92227	1	15552	1	0.00061504	0.0028309	0.580532	83	5
MPHOSPH8	6	0.60553	0.7252	1	11867	2	0.00061523	0.0028338	0.580532	84	4
KIRREL	6	0.95612	0.95611	1	16243	0	0.00062402	0.002878	0.580532	85	4
CHPF	6	0.31101	0.4955	1	7942	2	0.00062864	0.0028964	0.580532	86	3
PABPN1	3	0.46566	0.62936	1	10198	1	0.00064011	0.0029453	0.583532	87	2
MYBPHL	6	0.99803	0.99803	1	17186	0	0.00065853	0.0030395	0.592594	88	6
SATL1	6	0.99933	0.99933	1	17216	0	0.00066861	0.0030828	0.592594	89	6
SENP5	6	0.53424	0.67542	1	11013	2	0.00069029	0.0031808	0.592594	90	4
FOSL2	6	0.86806	0.8834	1	14791	1	0.00069757	0.0032146	0.592594	91	5
SPATS2L	6	0.42722	0.60321	1	9741	1	0.00070486	0.0032462	0.592594	92	4
SLC34A1	6	0.87688	0.88915	1	14909	1	0.00070639	0.0032526	0.592594	93	5
ASAP3	6	0.76668	0.82855	1	13730	1	0.0007187	0.0033111	0.592594	94	5
KIF15	6	0.47721	0.63729	1	10335	2	0.00072077	0.0033192	0.592594	95	4
ITGB4	6	0.99889	0.9989	1	17207	0	0.00072173	0.0033232	0.592594	96	6
SLC39A9	6	0.83101	0.8612	1	14353	1	0.00072501	0.0033404	0.592594	97	4
C14orf37	6	0.99927	0.99927	1	17214	0	0.00073108	0.0033692	0.592594	98	6
IFI16	6	0.99761	0.99758	1	17174	0	0.00075481	0.00348	0.600149	99	6
PCNXL3	6	0.59435	0.71717	1	11743	2	0.00075535	0.0034817	0.600149	100	1
NEK3	5	0.92587	0.92678	1	15647	0	0.00079366	0.0036529	0.618278	101	3
HPSE	6	0.50145	0.65341	1	10585	1	0.00079528	0.0036587	0.618278	102	3
DARC	5	0.83676	0.86444	1	14425	1	0.00082142	0.0037592	0.629097	103	4
B3GNT3	6	0.98502	0.98492	1	16862	0	0.0008564	0.0039148	0.631867	104	5
KIAA1430	4	0.82343	0.85699	1	14269	1	0.00086454	0.0039533	0.631867	105	3
NUCKS1	3	0.99913	0.99914	1	17213	0	0.00086514	0.0039568	0.631867	106	3
CD209	6	0.38552	0.57034	1	9163	1	0.00087093	0.0039832	0.631867	107	5
CENPB	6	0.33914	0.52425	1	8416	3	0.00088666	0.0040493	0.631867	108	3
OR6V1	6	0.99911	0.99911	1	17212	0	0.00089001	0.0040659	0.631867	109	6
CXorf66	4	0.96185	0.96179	1	16359	0	0.00090268	0.0041268	0.631867	110	3
IL7	3	0.65384	0.75878	1	12478	1	0.00090314	0.0041274	0.631867	111	2
SLC6A14	3	0.99909	0.99909	1	17211	0	0.00090665	0.0041423	0.631867	112	3
C12orf66	6	0.68378	0.78004	1	12848	1	0.00090675	0.0041423	0.631867	113	3
SEC31A	6	0.56598	0.69734	1	11401	1	0.00093193	0.0042457	0.636055	114	3
KRTAP26-1	4	0.83223	0.86189	1	14371	1	0.00094289	0.0042997	0.636055	115	3
HNRNPA0	5	0.69462	0.78798	1	13002	1	0.00095125	0.0043411	0.636055	116	4
NF1	6	0.98251	0.98245	1	16806	0	0.00095351	0.0043474	0.636055	117	5
C21orf128	5	0.53566	0.67638	1	11031	1	0.00095544	0.0043543	0.636055	118	2
GALNT14	6	0.8554	0.87542	1	14650	1	0.00098118	0.0044686	0.647267	119	5
OTUD3	6	0.93836	0.93838	1	15876	1	0.00099635	0.0045375	0.649988	120	4
CEL	6	0.999	0.999	1	17210	0	0.0010016	0.0045628	0.649988	121	6
CTSH	6	0.53163	0.67365	1	10970	2	0.001018	0.0046288	0.653993	122	3
POGK	6	0.98773	0.98767	1	16935	0	0.0010504	0.0047638	0.658452	123	4
KRT37	3	0.99894	0.99895	1	17209	0	0.0010569	0.0047925	0.658452	124	3
GRB7	6	0.96686	0.96684	1	16468	0	0.0010683	0.0048293	0.658452	125	5
BCAS4	6	0.84587	0.86974	1	14544	1	0.0010759	0.0048592	0.658452	126	5
LOXL1	6	0.63428	0.74523	1	12222	2	0.0010836	0.0048959	0.658452	127	2
HAVCR2	6	0.99891	0.99891	1	17208	0	0.0010909	0.0049252	0.658452	128	6
TRIM7	6	0.95534	0.95535	1	16221	0	0.0011223	0.0050677	0.658452	129	5
TM7SF2	6	0.98635	0.98627	1	16901	0	0.0011242	0.0050769	0.658452	130	5
PP2D1	5	0.99887	0.99887	1	17206	0	0.0011265	0.0050866	0.658452	131	5
VENTX	5	0.72021	0.80706	1	13355	1	0.0011324	0.0051102	0.658452	132	4
IL10RA	6	0.99886	0.99885	1	17205	0	0.0011446	0.0051636	0.658452	133	6
SEPT11	6	0.99885	0.99885	1	17204	0	0.0011458	0.0051688	0.658452	134	6
CPNE2	6	0.46073	0.626	1	10131	1	0.0011493	0.0051843	0.658452	135	4
RGS5	6	0.99885	0.99885	1	17203	0	0.0011516	0.0051952	0.658452	136	6
UBAP2	6	0.99884	0.99884	1	17202	0	0.0011618	0.0052406	0.659355	137	6
SORBS3	6	0.50981	0.65894	1	10693	1	0.0011801	0.005317	0.66412	138	5
SLC35A1	5	0.99878	0.9988	1	17200	0	0.0012155	0.0054577	0.676392	139	5
DLL3	6	0.99697	0.99692	1	17163	0	0.0012273	0.0055013	0.676392	140	6
UPRT	6	0.96156	0.9615	1	16351	0	0.0012345	0.0055329	0.676392	141	5
PRR15L	3	0.94533	0.9453	1	15986	0	0.0012786	0.005711	0.683338	142	3
NRP1	6	0.8325	0.86205	1	14374	1	0.0012805	0.005719	0.683338	143	5
CCDC135	6	0.96832	0.96825	1	16498	0	0.0012872	0.0057552	0.683338	144	4
DCN	6	0.99871	0.99873	1	17199	0	0.0012914	0.0057693	0.683338	145	6
TWIST2	6	0.97364	0.97358	1	16599	0	0.0012953	0.005788	0.683338	146	5
BEST4	6	0.92906	0.92962	1	15705	1	0.0013302	0.0059367	0.686402	147	4
NXF3	6	0.87368	0.88708	1	14859	1	0.0013317	0.0059408	0.686402	148	5
NPDC1	6	0.64827	0.75487	1	12412	1	0.0013462	0.0059959	0.686402	149	4
NHLRC1	5	0.99735	0.99733	1	17170	0	0.0013742	0.0061194	0.686402	150	5
HS3ST1	5	0.95848	0.95844	1	16285	0	0.001376	0.0061286	0.686402	151	4
TAS2R3	6	0.99862	0.99863	1	17198	0	0.0013838	0.0061573	0.686402	152	6
WDR17	6	0.9986	0.99862	1	17197	0	0.0014027	0.0062257	0.686402	153	6
HOXB5	6	0.52367	0.66827	1	10852	2	0.0014118	0.0062693	0.686402	154	4
ATP1B2	6	0.99858	0.99859	1	17196	0	0.0014232	0.0063136	0.686402	155	6
LRRN4CL	5	0.44989	0.61864	1	9998	1	0.0014252	0.0063262	0.686402	156	3
SSBP2	6	0.99857	0.99859	1	17195	0	0.001428	0.0063383	0.686402	157	6
FAM168B	6	0.8943	0.90129	1	15137	1	0.0014296	0.006344	0.686402	158	4
TMEM38B	5	0.22649	0.40277	1	6466	3	0.0014501	0.0064267	0.686402	159	2
PTGR1	4	0.64755	0.75437	1	12405	1	0.0014666	0.0064962	0.686402	160	2
PRDM14	6	0.99853	0.99855	1	17194	0	0.001467	0.0064985	0.686402	161	6
MYL5	6	0.97423	0.9742	1	16613	0	0.00147	0.0065129	0.686402	162	5
PSRC1	6	0.30257	0.48661	1	7789	3	0.0014774	0.0065422	0.686402	163	2
KCNMB1	6	0.99852	0.99853	1	17193	0	0.0014828	0.0065646	0.686402	164	6
SLC35F6	6	0.97469	0.97469	1	16621	0	0.0014926	0.0066059	0.686402	165	5
ACSM4	6	0.3677	0.55254	1	8850	3	0.0015123	0.0066967	0.686402	166	2
TMEM210	6	0.97873	0.97869	1	16707	0	0.0015155	0.0067128	0.686402	167	3
ZNF556	5	0.99073	0.9906	1	17006	0	0.0015201	0.0067323	0.686402	168	4
KCNJ10	5	0.99847	0.99848	1	17192	0	0.0015326	0.0067765	0.686402	169	5
MANEAL	6	0.65663	0.7607	1	12505	1	0.0015349	0.0067897	0.686402	170	3
CLIC6	6	0.02599	0.082516	0.840709	1690	4	0.001543	0.0068242	0.686402	171	1
STX3	6	0.61661	0.73322	1	12022	2	0.0015576	0.0068874	0.686402	172	3
SLC6A3	6	0.66278	0.76504	1	12585	1	0.0015581	0.0068891	0.686402	173	5
NDUFA12	4	0.037828	0.11065	0.912893	2088	2	0.0015978	0.0070528	0.692877	174	2
LYST	6	0.65052	0.75644	1	12441	2	0.0016044	0.0070821	0.692877	175	4
TMC7	6	0.99824	0.99825	1	17189	0	0.0016086	0.0070999	0.692877	176	6
KCNC1	6	0.78181	0.83573	1	13887	1	0.0016239	0.0071637	0.692877	177	4
C16orf72	6	0.7825	0.83602	1	13890	1	0.0016308	0.0071958	0.692877	178	4
ASCL2	4	0.99543	0.99536	1	17119	0	0.0016371	0.007228	0.692877	179	4
RUNX2	6	0.97966	0.97964	1	16728	0	0.0016389	0.0072355	0.692877	180	5
NGB	6	0.42441	0.6013	1	9713	2	0.0016501	0.0072831	0.693589	181	4
GAREML	6	0.11347	0.25445	1	4221	3	0.0016743	0.0073842	0.695003	182	1
LRRC10	6	0.99555	0.99549	1	17124	0	0.0017075	0.0075324	0.695003	183	5
LATS1	6	0.99498	0.99492	1	17110	0	0.0017209	0.0075836	0.695003	184	5
PLIN2	3	0.99319	0.99306	1	17067	0	0.0017263	0.0076111	0.695003	185	3
NFYC	5	0.023941	0.076859	0.823133	1604	1	0.001727	0.0076134	0.695003	186	4
chr10Rand	584	0.97502	0.97498	1	16626	170	0.0017347	0.0076416	0.695003	187	258
QTRT1	6	0.85998	0.87831	1	14698	1	0.0017366	0.0076473	0.695003	188	5
PRR16	6	0.34308	0.52815	1	8482	1	0.0017382	0.0076571	0.695003	189	5
SLC16A2	6	0.91525	0.91764	1	15455	1	0.0017388	0.0076611	0.695003	190	5
ZNF382	3	0.98249	0.98243	1	16805	0	0.0017565	0.0077323	0.695003	191	3
PYCR2	6	0.97401	0.97396	1	16607	0	0.0017589	0.0077415	0.695003	192	3
DNM3	6	0.9953	0.99523	1	17117	0	0.0018041	0.0079449	0.707159	193	5
LIMD1	6	0.28185	0.46489	1	7430	1	0.0018158	0.0079966	0.707159	194	4
FLT3LG	4	0.24935	0.42896	1	6840	2	0.0018165	0.008	0.707159	195	1
TTBK1	6	0.98461	0.98452	1	16850	0	0.0018366	0.0080948	0.71161	196	5
KRT77	6	0.99815	0.99815	1	17188	0	0.0018549	0.0081758	0.71161	197	6
CNNM1	6	0.81203	0.85088	1	14157	1	0.001882	0.0082964	0.71161	198	4
SOX12	5	0.57309	0.70225	1	11498	2	0.0018875	0.0083199	0.71161	199	2
TMEM255A	6	0.83612	0.86407	1	14422	1	0.0018907	0.0083326	0.71161	200	2
TRIM52	5	0.52539	0.66943	1	10876	1	0.0019081	0.0084078	0.71161	201	4
CLCF1	6	0.10653	0.24242	1	4055	1	0.0019285	0.0085049	0.71161	202	4
FAM169A	6	0.6496	0.75582	1	12423	1	0.0019357	0.0085342	0.71161	203	4
CXXC4	6	0.30186	0.4859	1	7774	2	0.0019367	0.0085382	0.71161	204	4
CYP20A1	6	0.4242	0.60118	1	9710	1	0.0019368	0.0085388	0.71161	205	4
NDST3	6	0.99806	0.99805	1	17187	0	0.0019376	0.0085399	0.71161	206	6
ZFPL1	6	0.603	0.72336	1	11836	1	0.0019466	0.0085836	0.71161	207	4
LZIC	4	0.52403	0.66853	1	10856	1	0.0019478	0.008587	0.71161	208	2
IQCA1	6	0.63252	0.74402	1	12204	2	0.0019763	0.0087059	0.718011	209	3
PAPPA2	6	0.76697	0.82867	1	13737	1	0.0019971	0.0087892	0.720121	210	5
POC5	6	0.83031	0.86079	1	14342	1	0.0020023	0.0088151	0.720121	211	3
CYP4F11	6	0.99795	0.99795	1	17185	0	0.0020483	0.0090098	0.722613	212	6
C8orf37	4	0.92041	0.92208	1	15547	0	0.0020539	0.0090339	0.722613	213	3
GSK3B	6	0.99794	0.99793	1	17184	0	0.0020623	0.0090736	0.722613	214	6
SMIM12	3	0.97907	0.97904	1	16718	0	0.0020636	0.0090805	0.722613	215	3
CMPK2	6	0.48254	0.64092	1	10400	2	0.0020679	0.0090965	0.722613	216	1
JOSD2	6	0.98086	0.98083	1	16760	0	0.0020681	0.0090971	0.722613	217	4
OR10V1	4	0.18651	0.3567	1	5743	1	0.002124	0.0093286	0.724732	218	3
OR6M1	3	0.99788	0.99786	1	17183	0	0.0021247	0.0093303	0.724732	219	3
LIPE	6	0.58701	0.71196	1	11654	1	0.0021511	0.0094486	0.724732	220	5
ATG4C	1	0.99785	0.99783	1	17182	0	0.0021518	0.0094504	0.724732	221	1
DNAH9	6	0.50195	0.65372	1	10593	2	0.0021526	0.0094538	0.724732	222	3
MYLK	6	0.88537	0.89485	1	15013	1	0.0021537	0.0094578	0.724732	223	5
DLC1	6	0.68863	0.78357	1	12921	1	0.0021587	0.0094791	0.724732	224	4
UPK1A	6	0.47228	0.6339	1	10270	2	0.0021747	0.0095337	0.724732	225	3
BBX	6	0.93782	0.93783	1	15866	1	0.0021778	0.0095463	0.724732	226	5
DNAJC4	6	0.79475	0.84218	1	14000	1	0.0021922	0.0096101	0.724732	227	5
PLEKHH3	6	0.14712	0.31029	1	5049	3	0.0021931	0.0096135	0.724732	228	3
ZNF223	6	0.82555	0.85818	1	14291	1	0.0021983	0.0096359	0.724732	229	5
GAA	6	0.99779	0.99778	1	17181	0	0.0022057	0.0096738	0.724732	230	6
MYEF2	6	0.19143	0.36248	1	5825	1	0.0022235	0.0097422	0.724732	231	5
TMPPE	5	0.38376	0.56853	1	9134	2	0.0022262	0.0097554	0.724732	232	3
SLC23A1	6	0.99774	0.99773	1	17180	0	0.0022568	0.0098812	0.724732	233	6
NCOA1	6	0.99772	0.9977	1	17179	0	0.0022827	0.0099782	0.724732	234	6
CR1L	4	0.9828	0.98275	1	16812	0	0.0022915	0.01001	0.724732	235	4
ICA1L	6	0.9763	0.97629	1	16656	0	0.0023009	0.010047	0.724732	236	5
CAD	6	0.75548	0.82336	1	13660	1	0.0023021	0.010056	0.724732	237	4
SLC24A2	6	0.99769	0.99767	1	17178	0	0.0023101	0.010085	0.724732	238	6
ASAP2	6	0.96814	0.9681	1	16494	0	0.0023302	0.010162	0.724732	239	5
SYT12	6	0.93276	0.93304	1	15765	1	0.0023363	0.010187	0.724732	240	5
STAT6	6	0.97517	0.97514	1	16635	0	0.0023408	0.010198	0.724732	241	4
EPHA2	6	0.63166	0.74341	1	12194	2	0.0023475	0.010223	0.724732	242	4
FAM43A	6	0.99764	0.99762	1	17177	0	0.0023562	0.010253	0.724732	243	6
MLH1	6	0.99763	0.99759	1	17176	0	0.0023696	0.010299	0.724732	244	6
PAWR	4	0.99763	0.99759	1	17175	0	0.00237	0.010301	0.724732	245	4
HTR2A	6	0.99438	0.99426	1	17097	0	0.0023978	0.010427	0.727803	246	5
KAZALD1	6	0.63166	0.74341	1	12193	1	0.0023985	0.010429	0.727803	247	5
CLDN2	6	0.98633	0.98625	1	16900	0	0.0024313	0.010553	0.730864	248	5
SMAD2	6	0.65923	0.76249	1	12528	2	0.0024324	0.010558	0.730864	249	4
SPR	6	0.067934	0.17217	0.992163	2987	3	0.0024613	0.010684	0.736653	250	3
ARNT	6	0.84046	0.86657	1	14475	1	0.002507	0.010871	0.73779	251	4
FOXP3	6	0.32567	0.51056	1	8197	2	0.002516	0.010906	0.73779	252	4
MTF2	6	0.99748	0.99745	1	17173	0	0.0025212	0.010929	0.73779	253	6
RIPPLY1	5	0.99747	0.99744	1	17172	0	0.0025253	0.010944	0.73779	254	5
EDA	6	0.99746	0.99743	1	17171	0	0.0025399	0.011	0.73779	255	6
PEX11B	6	0.91789	0.91987	1	15499	1	0.0025467	0.011024	0.73779	256	4
MYOM1	6	0.87204	0.88602	1	14842	1	0.002564	0.011097	0.73779	257	5
SNTN	3	0.85598	0.87577	1	14656	0	0.0025699	0.011125	0.73779	258	2
SUMF1	6	0.50428	0.65528	1	10620	1	0.0025978	0.011228	0.73779	259	2
SPATA16	5	0.32044	0.50529	1	8109	2	0.002598	0.01123	0.73779	260	2
OR13H1	4	0.97947	0.97946	1	16725	0	0.0026091	0.011268	0.73779	261	4
TIRAP	5	0.95467	0.95464	1	16202	0	0.0026231	0.011311	0.73779	262	4
SPIN3	5	0.48698	0.64391	1	10445	1	0.0026437	0.0114	0.73779	263	4
IFIT1	4	0.733	0.81354	1	13483	1	0.0026516	0.011441	0.73779	264	3
IL36A	5	0.84411	0.86873	1	14523	1	0.0026527	0.011446	0.73779	265	2
CXCR4	5	0.98516	0.98506	1	16868	0	0.0026558	0.011464	0.73779	266	4
TSC1	6	0.79249	0.84108	1	13979	1	0.0026565	0.011466	0.73779	267	5
FMO3	6	0.98767	0.98761	1	16932	0	0.002658	0.011471	0.73779	268	4
GRB10	6	0.99731	0.99728	1	17169	0	0.0026917	0.011603	0.742043	269	6
MPLKIP	6	0.16448	0.33107	1	5373	1	0.0026966	0.011623	0.742043	270	5
C14orf159	6	0.99727	0.99724	1	17168	0	0.0027323	0.011784	0.74316	271	6
MBD1	6	0.91255	0.91546	1	15404	1	0.0027622	0.011912	0.74316	272	5
TRAF2	6	0.65223	0.75766	1	12458	1	0.0027661	0.011924	0.74316	273	4
PLTP	6	0.85329	0.87415	1	14627	1	0.00277	0.011942	0.74316	274	5
EIF2S1	3	0.11218	0.25221	1	4187	2	0.0027734	0.011955	0.74316	275	1
NECAB3	6	0.99722	0.99719	1	17167	0	0.0027826	0.011994	0.74316	276	6
CAMK1	6	0.35001	0.53509	1	8593	2	0.0027833	0.011998	0.74316	277	4
MEX3C	6	0.70401	0.79483	1	13136	2	0.0027882	0.012025	0.74316	278	4
SH3KBP1	6	0.16131	0.32735	1	5321	2	0.0027891	0.012029	0.74316	279	2
SAMD8	6	0.9122	0.91517	1	15397	1	0.0028547	0.01232	0.752696	280	3
SPARC	6	0.57749	0.70535	1	11534	2	0.0028669	0.012371	0.752696	281	3
ITPR3	6	0.47809	0.63792	1	10346	2	0.0028883	0.012459	0.752696	282	3
MN1	6	0.977	0.97695	1	16673	0	0.0029001	0.012511	0.752696	283	5
SAC3D1	6	0.84054	0.86662	1	14476	1	0.002902	0.01252	0.752696	284	3
GNAI3	3	0.86703	0.88273	1	14773	0	0.0029045	0.012531	0.752696	285	2
NAGS	6	0.99709	0.99705	1	17166	0	0.0029128	0.012564	0.752696	286	6
AP3B1	5	0.99708	0.99704	1	17165	0	0.0029227	0.012599	0.752696	287	5
ULK2	6	0.98425	0.98418	1	16846	0	0.0029275	0.012621	0.752696	288	5
TSPAN13	6	0.64137	0.75005	1	12313	1	0.0029363	0.012661	0.752696	289	5
FHOD3	6	0.88719	0.89613	1	15038	1	0.0029468	0.012697	0.752696	290	3
GPD2	4	0.99705	0.99702	1	17164	0	0.00295	0.012707	0.752696	291	4
GALNT6	6	0.30137	0.48539	1	7764	2	0.0029721	0.012818	0.754689	292	3
SYTL5	6	0.80509	0.84734	1	14082	1	0.0029749	0.012828	0.754689	293	5
ZNF335	6	0.33763	0.52271	1	8397	2	0.0029858	0.012884	0.755388	294	3
SMR3B	1	0.99696	0.99691	1	17162	0	0.0030388	0.013102	0.7564	295	1
SUPT20H	6	0.62355	0.73794	1	12098	1	0.0030513	0.013146	0.7564	296	4
TRIM39	6	0.75594	0.82356	1	13661	1	0.0030816	0.013266	0.7564	297	4
CNTN5	6	0.99692	0.99686	1	17161	0	0.0030829	0.013273	0.7564	298	6
ADRBK2	6	0.88677	0.89583	1	15030	1	0.0030884	0.013293	0.7564	299	5
ANKRD37	5	0.50723	0.65722	1	10652	1	0.0030897	0.013297	0.7564	300	3
TRABD	6	0.94134	0.94133	1	15934	0	0.0030933	0.013314	0.7564	301	5
RP1	6	0.99688	0.99683	1	17160	0	0.0031171	0.0134	0.7564	302	6
RHBDL1	6	0.99688	0.99682	1	17159	0	0.0031213	0.013419	0.7564	303	6
NR5A2	6	0.38129	0.56607	1	9086	2	0.0031303	0.013459	0.7564	304	3
CDH24	6	0.77278	0.8314	1	13805	1	0.0031316	0.013464	0.7564	305	5
DHRS4	2	0.99686	0.9968	1	17158	0	0.0031416	0.013505	0.7564	306	2
SH3GL3	6	0.90784	0.91163	1	15344	1	0.0031426	0.013509	0.7564	307	4
TCTA	5	0.78621	0.83786	1	13932	1	0.003146	0.01353	0.7564	308	4
MRVI1	6	0.66256	0.76487	1	12582	1	0.0031521	0.01356	0.7564	309	4
NFKBID	6	0.0533	0.14314	0.964382	2558	3	0.0031808	0.013676	0.757569	310	2
GABRA5	6	0.99682	0.99676	1	17157	0	0.0031811	0.013676	0.757569	311	6
RGN	6	0.99171	0.99158	1	17031	0	0.0031894	0.013712	0.757569	312	5
FBP1	6	0.88474	0.89441	1	15002	1	0.0032328	0.01388	0.760261	313	4
SLFN12L	4	0.99676	0.9967	1	17156	0	0.003239	0.0139	0.760261	314	4
SLC6A18	6	0.95034	0.95025	1	16104	0	0.0032412	0.01391	0.760261	315	4
XBP1	6	0.51356	0.66148	1	10730	2	0.0032479	0.013938	0.760261	316	2
VSNL1	3	0.22014	0.39559	1	6346	1	0.0032646	0.014007	0.761642	317	2
TMEM141	3	0.9967	0.99663	1	17155	0	0.0033042	0.014162	0.762978	318	3
ERP29	1	0.99669	0.99662	1	17154	0	0.0033125	0.014196	0.762978	319	1
ANKRD54	6	0.29182	0.47536	1	7604	3	0.0033134	0.0142	0.762978	320	3
TACR3	6	0.96165	0.96159	1	16352	0	0.0033155	0.014209	0.762978	321	5
LATS2	6	0.8543	0.87478	1	14638	1	0.0033272	0.014263	0.7634	322	5
CBLC	6	0.99391	0.9938	1	17086	0	0.003343	0.014325	0.7634	323	5
SRSF7	6	0.27479	0.45732	1	7319	3	0.00335	0.014349	0.7634	324	3
SPTBN1	6	0.58989	0.71402	1	11687	1	0.0033643	0.014401	0.763793	325	4
GABRB3	6	0.63853	0.74814	1	12273	2	0.0034032	0.014555	0.766768	326	4
RDH12	6	0.99659	0.99653	1	17153	0	0.0034086	0.014576	0.766768	327	6
ZNF330	5	0.99659	0.99653	1	17152	0	0.0034127	0.014591	0.766768	328	5
ALDH16A1	6	0.18757	0.35794	1	5760	2	0.0034445	0.014702	0.770276	329	3
AMBRA1	6	0.51034	0.65932	1	10698	1	0.0034999	0.014886	0.7735	330	5
MSH2	6	0.48877	0.64501	1	10463	1	0.0035225	0.014964	0.7735	331	5
MFSD3	6	0.98128	0.98123	1	16772	0	0.0035461	0.015061	0.7735	332	5
ASB10	6	0.96501	0.96501	1	16431	0	0.0035595	0.015111	0.7735	333	4
C2orf69	4	0.87156	0.88569	1	14836	0	0.0035651	0.015135	0.7735	334	3
PNPLA8	6	0.30038	0.48436	1	7746	3	0.0035755	0.015168	0.7735	335	2
FDFT1	6	0.61663	0.73323	1	12023	2	0.0035797	0.015182	0.7735	336	4
JUNB	5	0.93718	0.93721	1	15849	0	0.0035811	0.015187	0.7735	337	2
TCF7L2	6	0.86702	0.88273	1	14771	1	0.0035983	0.015242	0.7735	338	4
PRIM1	2	0.77273	0.83137	1	13803	0	0.0036213	0.015318	0.7735	339	1
ASAH1	6	0.97942	0.97941	1	16723	0	0.0036238	0.015328	0.7735	340	5
C17orf102	5	0.1851	0.35509	1	5717	3	0.0036273	0.015341	0.7735	341	2
MTMR8	6	0.5323	0.67411	1	10983	1	0.0036326	0.015363	0.7735	342	5
C17orf97	6	0.50245	0.65405	1	10600	2	0.003641	0.015394	0.7735	343	3
SDK2	6	0.9924	0.99227	1	17048	0	0.0036533	0.015437	0.7735	344	4
LASP1	6	0.35187	0.53694	1	8620	1	0.0036915	0.015572	0.776326	345	5
TATDN2	6	0.27404	0.45651	1	7305	2	0.0036958	0.015583	0.776326	346	3
SERPINB10	5	0.32183	0.50665	1	8132	1	0.0037485	0.015776	0.780523	347	3
PRKCD	6	0.65329	0.75841	1	12469	1	0.0037634	0.015826	0.780523	348	5
NOBOX	6	0.96547	0.96544	1	16439	0	0.0037652	0.015831	0.780523	349	4
ENGASE	6	0.19888	0.37108	1	5960	3	0.003772	0.015849	0.780523	350	1
GIP	4	0.99618	0.99613	1	17147	0	0.0038177	0.016014	0.782299	351	4
RNF187	4	0.98999	0.98988	1	16988	0	0.0038272	0.016046	0.782299	352	4
CHKB	6	0.22785	0.40441	1	6481	2	0.0038341	0.016067	0.782299	353	4
KRT32	6	0.096794	0.22525	1	3803	2	0.0038375	0.016077	0.782299	354	1
UBASH3B	6	0.35539	0.54041	1	8682	2	0.00387	0.016181	0.782299	355	4
SNN	4	0.78537	0.83745	1	13919	1	0.0038759	0.016202	0.782299	356	3
FURIN	6	0.97337	0.97331	1	16590	0	0.0038794	0.016214	0.782299	357	4
TMEM119	3	0.95261	0.95256	1	16155	0	0.0039072	0.016318	0.782299	358	3
RGS7	6	0.98155	0.9815	1	16784	0	0.0039092	0.016324	0.782299	359	5
PTGDR2	5	0.55276	0.68813	1	11255	2	0.0039259	0.016386	0.782299	360	3
ZHX1	5	0.99605	0.99598	1	17141	0	0.0039454	0.016462	0.782299	361	5
STAT5B	6	0.55126	0.68708	1	11236	2	0.0039685	0.016539	0.782299	362	2
OR52D1	5	0.99325	0.99312	1	17069	0	0.0039703	0.016541	0.782299	363	5
PHF2	6	0.76332	0.82693	1	13710	1	0.00401	0.016681	0.782299	364	5
TTC39B	6	0.2887	0.4721	1	7552	1	0.0040177	0.016702	0.782299	365	3
CADM3	6	0.9884	0.9883	1	16955	0	0.0040197	0.016706	0.782299	366	5
ADD2	6	0.13028	0.28328	1	4657	3	0.0040339	0.016758	0.782299	367	3
CLDN23	5	0.99597	0.9959	1	17138	0	0.0040341	0.016758	0.782299	368	5
IGFALS	5	0.95054	0.95045	1	16112	0	0.0040408	0.016782	0.782299	369	4
CPEB4	6	0.97975	0.97973	1	16733	0	0.0040443	0.016792	0.782299	370	4
ANKEF1	6	0.59322	0.71638	1	11729	2	0.0040763	0.016902	0.783621	371	4
CBFB	6	0.6695	0.76984	1	12664	1	0.0040994	0.016986	0.783621	372	4
DUSP13	6	0.29991	0.48389	1	7735	2	0.0041023	0.016996	0.783621	373	4
CCDC177	5	0.99078	0.99065	1	17007	0	0.004104	0.017003	0.783621	374	4
TSPAN16	6	0.42602	0.60238	1	9735	1	0.0041199	0.017062	0.784251	375	5
MAP4K5	6	0.96639	0.96637	1	16460	0	0.0041427	0.017135	0.785509	376	5
CDK15	6	0.11179	0.25153	1	4176	2	0.0041649	0.017232	0.787613	377	2
MAP1LC3C	3	0.54937	0.68579	1	11214	1	0.0041752	0.017272	0.787613	378	2
C19orf35	6	0.29182	0.47536	1	7605	3	0.0042106	0.017382	0.789147	379	2
ADCY6	6	0.86761	0.88311	1	14783	1	0.0042304	0.017445	0.789147	380	5
NMNAT1	2	0.98529	0.9852	1	16872	0	0.0042334	0.017453	0.789147	381	2
DLG1	6	0.45359	0.62117	1	10041	2	0.0042792	0.017607	0.789147	382	3
ZDBF2	5	0.97137	0.97129	1	16552	0	0.0043004	0.017672	0.789147	383	4
THAP3	5	0.99569	0.99563	1	17131	0	0.0043056	0.017689	0.789147	384	5
TRIM33	6	0.99563	0.99557	1	17129	0	0.0043125	0.017714	0.789147	385	5
AK1	6	0.78043	0.83505	1	13872	1	0.0043193	0.017736	0.789147	386	5
ACOT11	6	0.34433	0.5294	1	8501	2	0.0043323	0.017784	0.789147	387	3
RBM5	6	0.4849	0.64251	1	10420	2	0.0043483	0.017829	0.789147	388	2
B4GALNT1	6	0.58363	0.70958	1	11607	1	0.0043515	0.017833	0.789147	389	5
MGAT3	5	0.10409	0.23811	1	3986	1	0.0043598	0.017855	0.789147	390	4
GOLGB1	6	0.70549	0.79592	1	13159	1	0.0044382	0.018122	0.789725	391	5
SRRD	5	0.9732	0.97314	1	16585	0	0.0044407	0.018131	0.789725	392	3
MAGIX	6	0.28987	0.47332	1	7566	3	0.0044922	0.018319	0.789725	393	3
HSP90B1	1	0.9955	0.99544	1	17123	0	0.0044952	0.018325	0.789725	394	1
RAB11FIP2	6	0.76131	0.82598	1	13698	1	0.0045059	0.018359	0.789725	395	5
SLC35C2	6	0.14892	0.31256	1	5082	1	0.0045105	0.018377	0.789725	396	3
C12orf56	5	0.99547	0.99541	1	17121	0	0.0045324	0.018451	0.789725	397	5
SH2D4B	6	0.9856	0.98551	1	16882	0	0.0045424	0.018479	0.789725	398	5
YEATS4	3	0.035377	0.10538	0.899995	2018	2	0.004543	0.018479	0.789725	399	1
GPR37	6	0.67044	0.7705	1	12674	1	0.0045533	0.018506	0.789725	400	4
HOXD1	6	0.84307	0.86807	1	14505	1	0.0045588	0.018524	0.789725	401	5
LYZ	6	0.95866	0.95863	1	16289	0	0.0045612	0.018532	0.789725	402	4
LANCL2	6	0.22038	0.39586	1	6352	2	0.004568	0.018554	0.789725	403	4
CCND3	6	0.45193	0.62005	1	10025	2	0.0045861	0.018615	0.789725	404	3
ZFHX4	6	0.50736	0.65731	1	10655	1	0.0046125	0.018711	0.789725	405	5
SIAH2	6	0.89802	0.9041	1	15183	1	0.0046147	0.018721	0.789725	406	4
SULT1C2	6	0.91329	0.91606	1	15416	1	0.004617	0.018728	0.789725	407	4
DPF3	6	0.80873	0.84918	1	14126	1	0.0046226	0.018749	0.789725	408	4
COL16A1	6	0.73936	0.81629	1	13529	1	0.0046231	0.018752	0.789725	409	4
PTPRT	6	0.95935	0.95933	1	16308	0	0.0046355	0.018784	0.789725	410	3
FKBP2	6	0.17674	0.3454	1	5573	3	0.0046886	0.018948	0.793293	411	2
SLC26A6	6	0.27659	0.45925	1	7349	3	0.0046906	0.018961	0.793293	412	2
HNRNPH2	4	0.16588	0.33273	1	5387	1	0.0047359	0.019111	0.797605	413	3
GPR137	6	0.42982	0.60492	1	9769	1	0.004754	0.019168	0.79807	414	2
TERF2IP	6	0.050854	0.13816	0.957715	2486	3	0.0048195	0.019406	0.800007	415	2
CAMP	5	0.99475	0.99466	1	17106	0	0.0048378	0.019481	0.800007	416	5
NEUROD6	4	0.89235	0.89988	1	15108	0	0.0048527	0.019527	0.800007	417	3
ZP1	6	0.97906	0.97903	1	16717	0	0.0048531	0.019528	0.800007	418	3
TTLL8	6	0.826	0.85844	1	14301	1	0.0048588	0.01955	0.800007	419	4
C22orf26	3	0.36332	0.54825	1	8793	1	0.0048705	0.019586	0.800007	420	1
NAT16	6	0.17211	0.33997	1	5491	2	0.0048802	0.019624	0.800007	421	4
CSE1L	6	0.025132	0.080149	0.83251	1658	4	0.0048849	0.019639	0.800007	422	2
AGER	6	0.62641	0.73985	1	12132	2	0.0048974	0.019678	0.800007	423	4
HMGCLL1	5	0.9951	0.99504	1	17113	0	0.0048978	0.019679	0.800007	424	5
FEM1B	6	0.51817	0.6646	1	10794	1	0.0049493	0.019864	0.803944	425	5
PAPPA	6	0.77997	0.83484	1	13865	1	0.0049503	0.019869	0.803944	426	4
UBL4A	6	0.32843	0.51337	1	8256	2	0.0050158	0.020088	0.808347	427	3
TC2N	4	0.43176	0.60628	1	9792	1	0.0050351	0.020144	0.808347	428	2
IGFL2	3	0.60291	0.7233	1	11835	1	0.0050414	0.020162	0.808347	429	2
PIK3R1	6	0.36827	0.55309	1	8861	1	0.0050418	0.020165	0.808347	430	5
ADAMTS18	6	0.8818	0.89244	1	14967	1	0.0050563	0.020216	0.808493	431	4
BARX1	6	0.058539	0.15364	0.97065	2726	2	0.0050797	0.020313	0.808874	432	4
NUMB	6	0.69218	0.78618	1	12969	2	0.0050812	0.020319	0.808874	433	3
PTCD2	6	0.5451	0.68285	1	11160	1	0.0051308	0.020476	0.813239	434	5
ZBTB25	5	0.31867	0.50346	1	8079	2	0.0051934	0.020698	0.815869	435	3
HAO2	6	0.10982	0.24813	1	4128	2	0.005212	0.020759	0.815869	436	3
THY1	6	0.72149	0.80806	1	13377	1	0.0052282	0.020809	0.815869	437	5
LCP2	6	0.99189	0.99177	1	17034	0	0.0052296	0.020814	0.815869	438	5
LAMB1	6	0.51704	0.66383	1	10781	2	0.0052775	0.020965	0.815869	439	3
CHIC1	6	0.70329	0.79428	1	13125	2	0.0052818	0.020978	0.815869	440	3
MCCD1	1	0.99472	0.99462	1	17105	0	0.0052836	0.020985	0.815869	441	1
CECR1	6	0.96469	0.96469	1	16424	0	0.0053081	0.021069	0.815869	442	4
ISLR	6	0.9132	0.916	1	15415	1	0.0053341	0.021158	0.815869	443	5
USP9Y	6	0.24841	0.4279	1	6821	1	0.0053701	0.021286	0.815869	444	5
LRRN1	5	0.22191	0.39757	1	6383	3	0.0053815	0.021331	0.815869	445	2
TSPYL6	4	0.28865	0.47204	1	7551	2	0.0053986	0.021394	0.815869	446	2
ATF5	6	0.21701	0.39201	1	6300	1	0.0054043	0.021415	0.815869	447	3
PLA2G7	2	0.78026	0.83496	1	13871	0	0.0054132	0.021438	0.815869	448	1
APEX2	6	0.89942	0.90515	1	15200	1	0.0054265	0.021492	0.815869	449	4
CARS	6	0.20975	0.3837	1	6162	3	0.0054715	0.021643	0.815869	450	2
ZC4H2	6	0.84785	0.87091	1	14564	1	0.0054861	0.021687	0.815869	451	3
SLC36A1	6	0.26376	0.4452	1	7099	1	0.0054985	0.021735	0.815869	452	4
SYBU	6	0.20268	0.37552	1	6022	1	0.0055252	0.021818	0.815869	453	3
ZBTB24	6	0.12918	0.28142	1	4628	3	0.0056032	0.022076	0.815869	454	3
CWC27	6	0.25182	0.43177	1	6886	1	0.0056039	0.022077	0.815869	455	3
SPSB2	6	0.94206	0.94209	1	15945	0	0.0056045	0.022079	0.815869	456	3
NPBWR1	5	0.99439	0.99427	1	17099	0	0.0056112	0.022104	0.815869	457	5
SYP	6	0.85146	0.87307	1	14612	1	0.0056347	0.022183	0.815869	458	5
SCN5A	6	0.98933	0.98923	1	16972	0	0.0056596	0.022273	0.815869	459	4
TMEM106C	6	0.93601	0.93608	1	15822	1	0.0056699	0.022306	0.815869	460	4
SLC18A2	6	0.97873	0.9787	1	16708	0	0.0056706	0.022307	0.815869	461	5
GPRC5D	5	0.23273	0.41001	1	6556	1	0.0056826	0.022352	0.815869	462	3
ROPN1B	3	0.9585	0.95846	1	16286	0	0.0056889	0.022376	0.815869	463	3
CS	2	0.99431	0.9942	1	17095	0	0.0056917	0.022386	0.815869	464	2
REP15	6	0.92134	0.92288	1	15564	1	0.0057203	0.022483	0.815869	465	5
ZNF649	5	0.9329	0.93316	1	15769	0	0.0057337	0.02253	0.815869	466	4
DBX2	6	0.9138	0.91647	1	15425	1	0.0057462	0.022569	0.815869	467	5
C8orf58	6	0.94626	0.94624	1	16014	0	0.0057509	0.022583	0.815869	468	5
CYP8B1	5	0.99425	0.99414	1	17093	0	0.0057547	0.022594	0.815869	469	5
LPAR5	5	0.99424	0.99413	1	17092	0	0.0057565	0.0226	0.815869	470	5
IFRD2	6	0.95719	0.95714	1	16263	0	0.0057635	0.022623	0.815869	471	4
AVPI1	5	0.98715	0.9871	1	16924	0	0.0057788	0.022665	0.815869	472	4
ABHD16B	6	0.53524	0.67609	1	11027	1	0.0057965	0.022723	0.815869	473	5
ARHGAP35	6	0.97501	0.97497	1	16625	0	0.0058068	0.022763	0.815869	474	5
OTOR	5	0.99417	0.99405	1	17090	0	0.0058329	0.022849	0.815869	475	5
FOXP1	6	0.99191	0.99179	1	17036	0	0.0058396	0.022872	0.815869	476	5
MDH2	6	0.96268	0.96264	1	16386	0	0.0058447	0.022894	0.815869	477	5
AQP9	6	0.39839	0.58318	1	9392	1	0.005866	0.022963	0.815869	478	4
SELENBP1	6	0.25033	0.43005	1	6854	1	0.0058859	0.023029	0.815869	479	4
OTOF	6	0.21521	0.38997	1	6257	1	0.0059017	0.02308	0.815869	480	5
SAMD9	5	0.99407	0.99396	1	17089	0	0.005931	0.023179	0.815869	481	5
DSG1	6	0.99655	0.99648	1	17151	0	0.0059548	0.023254	0.815869	482	5
NELL1	6	0.45837	0.62438	1	10095	2	0.0059643	0.023277	0.815869	483	3
PIPOX	6	0.50672	0.65688	1	10648	2	0.0059968	0.023379	0.815869	484	2
ARHGAP12	6	0.24197	0.42051	1	6708	2	0.0060622	0.023579	0.815869	485	4
H1FNT	5	0.78642	0.83798	1	13934	1	0.0060744	0.023614	0.815869	486	4
NIT1	6	0.83559	0.86376	1	14415	1	0.0060756	0.023617	0.815869	487	4
HK1	6	0.24514	0.42418	1	6761	1	0.0060818	0.02364	0.815869	488	4
CCDC17	6	0.58246	0.7088	1	11596	1	0.0061018	0.023706	0.815869	489	5
HLA-DOA	6	0.13835	0.29681	1	4866	1	0.0061035	0.023711	0.815869	490	4
ITIH6	6	0.87481	0.88779	1	14876	1	0.0061092	0.023729	0.815869	491	5
RIN3	6	0.99071	0.99059	1	17004	0	0.006115	0.023748	0.815869	492	5
ANGPTL4	6	0.55012	0.68629	1	11223	2	0.0061275	0.023791	0.815869	493	2
CITED4	6	0.94993	0.94987	1	16095	0	0.0061277	0.023791	0.815869	494	5
TRPM2	6	0.98938	0.98928	1	16974	0	0.0061343	0.023815	0.815869	495	5
STK17A	6	0.079032	0.19283	1	3305	2	0.0061929	0.024008	0.815869	496	4
TXNRD2	6	0.50077	0.65297	1	10580	1	0.0061949	0.024016	0.815869	497	2
TMEM65	3	0.99378	0.99365	1	17082	0	0.0062157	0.024091	0.815869	498	3
DUSP9	6	0.26121	0.44239	1	7060	1	0.0062316	0.024155	0.815869	499	5
PAPD4	3	0.99375	0.99361	1	17081	0	0.0062536	0.024226	0.815869	500	3
CDC42BPA	6	0.53581	0.67648	1	11033	1	0.006257	0.024237	0.815869	501	5
ACOT7	6	0.66141	0.76405	1	12566	1	0.0062583	0.024243	0.815869	502	5
DNAH1	6	0.99583	0.99577	1	17133	0	0.0062704	0.024285	0.815869	503	5
TRPC7	6	0.98379	0.98373	1	16834	0	0.0062728	0.024294	0.815869	504	4
KLF1	6	0.35137	0.53645	1	8612	1	0.0062997	0.024377	0.815869	505	4
MFAP5	3	0.96167	0.96161	1	16353	0	0.0063106	0.024416	0.815869	506	3
SULT1C3	3	0.99368	0.99354	1	17080	0	0.0063196	0.024447	0.815869	507	3
IGHMBP2	6	0.4482	0.61751	1	9981	1	0.0063266	0.024468	0.815869	508	4
NPAS2	6	0.9487	0.94866	1	16066	0	0.0063345	0.024494	0.815869	509	4
AMIGO2	5	0.99367	0.99352	1	17079	0	0.0063346	0.024494	0.815869	510	5
ATP6V1E2	4	0.37337	0.5582	1	8951	1	0.006358	0.024566	0.815869	511	2
CTNNBIP1	5	0.70443	0.79515	1	13143	1	0.0063674	0.024597	0.815869	512	4
ATP8B1	6	0.99441	0.9943	1	17101	0	0.0063706	0.024608	0.815869	513	5
ZBTB47	6	0.66813	0.76886	1	12648	2	0.0063833	0.024644	0.815869	514	4
PLEKHA1	6	0.94559	0.94557	1	15997	0	0.0063934	0.024676	0.815869	515	4
BRDT	4	0.96048	0.96042	1	16330	0	0.0064452	0.024856	0.815869	516	3
CFH	6	0.41761	0.5968	1	9644	2	0.0064663	0.024932	0.815869	517	3
CYB561D1	5	0.68	0.77735	1	12793	1	0.0064714	0.024948	0.815869	518	1
FBXW12	6	0.044108	0.12405	0.938486	2278	1	0.0064727	0.024953	0.815869	519	5
FPGT	2	0.90364	0.90833	1	15270	0	0.0065049	0.025057	0.815869	520	2
GNMT	6	0.96234	0.96227	1	16377	0	0.0065133	0.025084	0.815869	521	5
LYZL4	6	0.11211	0.25208	1	4186	1	0.0065142	0.025089	0.815869	522	4
FAM134C	6	0.7564	0.82377	1	13665	1	0.0065175	0.025099	0.815869	523	3
AKR1E2	6	0.86603	0.88213	1	14764	1	0.0065244	0.025124	0.815869	524	4
SPATA2	5	0.79825	0.84393	1	14027	1	0.0065258	0.025126	0.815869	525	4
MAP10	6	0.98856	0.98845	1	16959	0	0.0065271	0.025128	0.815869	526	4
UGT2A1	3	0.52861	0.67159	1	10926	1	0.0065271	0.025128	0.815869	527	2
PEX6	6	0.8817	0.89237	1	14964	1	0.00654	0.025166	0.815869	528	4
ULK4	6	0.51479	0.6623	1	10749	2	0.0065485	0.025192	0.815869	529	4
CDR2	6	0.75196	0.82182	1	13631	1	0.006553	0.025216	0.815869	530	5
KLHDC3	6	0.64369	0.75169	1	12351	1	0.0065927	0.025344	0.815869	531	4
ENKD1	6	0.9782	0.97815	1	16699	0	0.006595	0.02535	0.815869	532	5
KIAA1841	6	0.39774	0.58251	1	9380	1	0.0066165	0.025431	0.815869	533	5
ANAPC5	6	0.0079805	0.029545	0.606038	838	4	0.0066177	0.025436	0.815869	534	2
FAM20C	6	0.14817	0.31163	1	5064	3	0.0066177	0.025436	0.815869	535	2
ARSF	6	0.16115	0.32716	1	5317	3	0.0066178	0.025437	0.815869	536	3
ATP11A	6	0.34194	0.52701	1	8466	1	0.0066215	0.025451	0.815869	537	5
ZNF148	5	0.98474	0.98465	1	16856	0	0.0066662	0.025599	0.815869	538	4
IMPA1	5	0.53435	0.67549	1	11016	1	0.0066903	0.025676	0.815869	539	3
COL21A1	6	0.20802	0.38174	1	6130	1	0.0067093	0.025738	0.815869	540	2
FAM171B	6	0.95604	0.95604	1	16240	0	0.0067135	0.025745	0.815869	541	4
SEZ6L2	6	0.34378	0.52886	1	8493	3	0.0067157	0.025754	0.815869	542	3
SLC30A5	6	0.095076	0.22212	1	3759	2	0.0067247	0.02578	0.815869	543	4
ARHGEF37	6	0.87322	0.8868	1	14852	1	0.0067388	0.025823	0.815869	544	4
PSPN	3	0.55955	0.69284	1	11321	1	0.0067685	0.025914	0.815869	545	1
TENM3	6	0.9802	0.98016	1	16745	0	0.0067749	0.025932	0.815869	546	5
HMX1	6	0.29437	0.47806	1	7648	2	0.006781	0.025955	0.815869	547	2
LRP4	6	0.90121	0.90648	1	15231	1	0.0067881	0.025978	0.815869	548	4
GLB1L2	6	0.98362	0.98357	1	16829	0	0.0067917	0.025986	0.815869	549	5
CMTM5	6	0.99559	0.99553	1	17125	0	0.0068072	0.026033	0.815869	550	5
MAN2B1	6	0.65524	0.75974	1	12486	2	0.0068464	0.026171	0.816635	551	3
ADRBK1	6	0.21317	0.38763	1	6227	1	0.006847	0.026174	0.816635	552	4
ULK1	6	0.86134	0.87919	1	14713	1	0.0068542	0.026199	0.816635	553	3
C11orf34	4	0.65713	0.76105	1	12510	1	0.0069098	0.026384	0.820898	554	3
KDM4B	6	0.20577	0.37918	1	6088	2	0.0069737	0.026593	0.824182	555	3
ZNF619	6	0.38625	0.57108	1	9178	3	0.006977	0.026604	0.824182	556	1
RB1	5	0.99299	0.99287	1	17062	0	0.0070071	0.026709	0.824182	557	5
C18orf8	6	0.96802	0.96798	1	16492	0	0.0070085	0.026711	0.824182	558	5
MGLL	6	0.83802	0.86516	1	14445	1	0.0070134	0.026728	0.824182	559	4
CYP4F3	3	0.98271	0.98266	1	16808	0	0.0070347	0.026803	0.824624	560	3
SPDYC	6	0.66955	0.76988	1	12665	1	0.0070473	0.026839	0.824624	561	3
EOMES	6	0.93357	0.93379	1	15777	1	0.0070752	0.026927	0.824624	562	5
TEKT4	4	0.94953	0.94947	1	16079	0	0.00709	0.02698	0.824624	563	3
HEY2	6	0.95575	0.95574	1	16231	0	0.0071076	0.027035	0.824624	564	3
ARIH2	4	0.99289	0.99276	1	17057	0	0.0071132	0.027049	0.824624	565	4
TMEM26	6	0.97825	0.9782	1	16700	0	0.007133	0.027113	0.824624	566	4
PATL2	6	0.68978	0.78441	1	12937	2	0.0071516	0.027171	0.824624	567	4
SCFD2	6	0.92569	0.92661	1	15643	1	0.0071729	0.027247	0.824624	568	3
RNF145	5	0.93733	0.93736	1	15851	0	0.0071793	0.027268	0.824624	569	3
AQP11	5	0.9928	0.99268	1	17056	0	0.0071959	0.027315	0.824624	570	5
CUEDC1	6	0.79635	0.84297	1	14012	1	0.0072335	0.027442	0.824624	571	5
ANKFN1	6	0.41103	0.59255	1	9561	1	0.0072341	0.027443	0.824624	572	5
SLC17A8	6	0.75221	0.82193	1	13634	1	0.0072383	0.027458	0.824624	573	3
PHEX	6	0.69796	0.79043	1	13048	1	0.0072387	0.027463	0.824624	574	5
MESP2	5	0.98131	0.98127	1	16775	0	0.0073426	0.027826	0.824624	575	4
BCORL1	6	0.53114	0.67331	1	10964	1	0.0073588	0.027878	0.824624	576	4
CCDC125	6	0.99561	0.99555	1	17127	0	0.0073637	0.027892	0.824624	577	5
FNDC9	4	0.9419	0.94193	1	15943	0	0.0073989	0.028009	0.824624	578	3
ETNK1	4	0.14388	0.30595	1	4992	2	0.0074038	0.028025	0.824624	579	1
APBA3	6	0.70283	0.79395	1	13115	1	0.0074264	0.028101	0.824624	580	5
CDK12	6	0.011651	0.040958	0.677728	1041	3	0.0074342	0.028122	0.824624	581	2
XKR8	6	0.95166	0.95158	1	16138	0	0.0074995	0.028337	0.824624	582	3
SOS1	6	0.93698	0.93701	1	15845	1	0.0075164	0.028394	0.824624	583	4
SULT1A2	1	0.99248	0.99234	1	17051	0	0.0075175	0.028397	0.824624	584	1
CHCHD2	4	0.75961	0.82519	1	13685	1	0.0075446	0.02849	0.824624	585	2
ANKRD36C	3	0.99244	0.99231	1	17050	0	0.0075571	0.028538	0.824624	586	3
IL2RA	6	0.66589	0.76731	1	12620	1	0.0075581	0.028541	0.824624	587	5
SLAMF9	6	0.91855	0.92044	1	15510	1	0.0075603	0.028546	0.824624	588	4
CCK	6	0.91273	0.91561	1	15409	1	0.0075647	0.028561	0.824624	589	4
ROBO2	6	0.34512	0.53017	1	8515	2	0.0075723	0.028587	0.824624	590	4
PTH2R	6	0.99598	0.99591	1	17139	0	0.0075904	0.028648	0.824624	591	5
MMP17	6	0.85304	0.87399	1	14623	1	0.0075948	0.028661	0.824624	592	3
B3GALTL	6	0.94888	0.94884	1	16068	0	0.0075948	0.028661	0.824624	593	4
PLA2G4D	6	0.57835	0.70593	1	11547	1	0.007614	0.028719	0.824624	594	5
COPG2	4	0.986	0.98592	1	16891	0	0.0076182	0.028734	0.824624	595	4
MFSD9	6	0.98604	0.98596	1	16892	0	0.0076209	0.028743	0.824624	596	5
DOCK11	6	0.37554	0.56036	1	8986	2	0.0076275	0.028761	0.824624	597	4
ASB16	6	0.70351	0.79444	1	13130	2	0.0076278	0.028762	0.824624	598	2
AP2M1	6	0.11594	0.25883	1	4280	3	0.00763	0.028773	0.824624	599	2
LGI1	6	0.31125	0.49576	1	7944	1	0.0076345	0.028789	0.824624	600	3
C16orf87	2	0.99233	0.9922	1	17046	0	0.0076697	0.028895	0.824624	601	2
INSRR	6	0.86992	0.88462	1	14822	1	0.0076781	0.028928	0.824624	602	5
RAB19	6	0.96491	0.96491	1	16428	0	0.0076941	0.02898	0.824624	603	5
LGI4	6	0.97287	0.97279	1	16573	0	0.0076953	0.028985	0.824624	604	5
C10orf114	5	0.41677	0.59626	1	9631	1	0.0077067	0.029018	0.824624	605	4
RNF219	5	0.21406	0.38861	1	6243	3	0.0077235	0.029073	0.824624	606	2
CLDND1	6	0.2264	0.40267	1	6464	1	0.0077255	0.029085	0.824624	607	4
ADIRF	5	0.99227	0.99214	1	17042	0	0.0077262	0.029087	0.824624	608	5
UMODL1	6	0.67207	0.77166	1	12690	2	0.0077653	0.029195	0.826182	609	3
CNDP1	6	0.98887	0.98876	1	16965	0	0.0077916	0.029271	0.826182	610	4
EN2	6	0.36992	0.55473	1	8895	2	0.0077962	0.029286	0.826182	611	4
SSUH2	6	0.92022	0.92191	1	15542	1	0.0078472	0.029452	0.829507	612	4
TLR3	6	0.86559	0.88184	1	14759	1	0.0078911	0.029591	0.832079	613	3
ACBD3	6	0.98129	0.98124	1	16773	0	0.0079043	0.029643	0.832175	614	4
ACADL	6	0.9927	0.99256	1	17054	0	0.0079428	0.029768	0.832877	615	5
PLOD3	6	0.93309	0.93333	1	15772	1	0.0079507	0.029795	0.832877	616	3
XYLT2	6	0.02416	0.077445	0.823133	1618	4	0.0079564	0.029817	0.832877	617	1
GRM4	6	0.6287	0.7414	1	12158	1	0.007972	0.029861	0.832877	618	5
BTBD19	6	0.54265	0.68117	1	11122	2	0.0080149	0.030003	0.833187	619	3
FBXL22	6	0.36038	0.5454	1	8757	2	0.0080217	0.030025	0.833187	620	3
SOX6	6	0.98689	0.98683	1	16916	0	0.0080292	0.030045	0.833187	621	5
ACAN	6	0.8871	0.89606	1	15037	1	0.0080362	0.030066	0.833187	622	4
HPD	6	0.89362	0.90079	1	15128	1	0.0080493	0.030116	0.833233	623	4
ANXA11	6	0.98239	0.98234	1	16803	0	0.0081118	0.03031	0.834028	624	4
CCSER2	6	0.91405	0.91666	1	15433	1	0.0081341	0.030384	0.834028	625	5
GALNT16	6	0.61982	0.73538	1	12054	2	0.0081522	0.030444	0.834028	626	2
ZDHHC9	6	0.31486	0.49959	1	8011	2	0.0081699	0.030497	0.834028	627	4
IGF2BP3	3	0.99182	0.9917	1	17033	0	0.00818	0.030529	0.834028	628	3
HOXB3	6	0.68401	0.7802	1	12851	1	0.0081915	0.03056	0.834028	629	4
PEBP4	6	0.99312	0.99299	1	17064	0	0.0082055	0.030606	0.834028	630	5
ZNF768	5	0.98809	0.988	1	16949	0	0.008212	0.03063	0.834028	631	4
OR6K2	4	0.99179	0.99166	1	17032	0	0.0082135	0.030634	0.834028	632	4
SLC25A45	6	0.24984	0.42947	1	6848	3	0.0082175	0.030645	0.834028	633	3
ARHGAP27	6	0.94889	0.94885	1	16069	0	0.0082827	0.03085	0.834028	634	3
RALGAPB	6	0.54597	0.68346	1	11171	1	0.0083	0.030904	0.834028	635	5
NABP2	5	0.9917	0.99156	1	17030	0	0.0083044	0.030919	0.834028	636	5
NGF	5	0.99169	0.99156	1	17028	0	0.0083109	0.030936	0.834028	637	5
FAM132B	6	0.93862	0.93862	1	15884	1	0.0083286	0.031	0.834028	638	4
GRIA3	6	0.93523	0.93536	1	15797	1	0.0083469	0.031065	0.834028	639	5
RGS12	6	0.11193	0.25177	1	4181	2	0.0083479	0.031068	0.834028	640	2
BHLHA15	4	0.20148	0.37415	1	6000	2	0.0083617	0.031109	0.834028	641	2
RBL2	6	0.91464	0.91714	1	15444	1	0.008389	0.031209	0.834028	642	3
SNX9	6	0.6063	0.72579	1	11889	1	0.0084001	0.031237	0.834028	643	5
KIAA1683	6	0.1523	0.31667	1	5154	2	0.0084026	0.031247	0.834028	644	4
SH3RF1	6	0.07805	0.19104	1	3276	2	0.0084132	0.031278	0.834028	645	1
DEPDC4	3	0.99158	0.99146	1	17026	0	0.0084164	0.031285	0.834028	646	3
GPR4	6	0.12087	0.26729	1	4409	2	0.0084254	0.031308	0.834028	647	4
ZMIZ2	6	0.99383	0.9937	1	17085	0	0.0085102	0.031582	0.834028	648	5
FBN2	6	0.3804	0.56518	1	9075	2	0.0085258	0.03163	0.834028	649	4
SLC35F2	6	0.64973	0.75591	1	12426	1	0.0085437	0.031683	0.834028	650	4
C1orf64	6	0.94651	0.94647	1	16020	0	0.008557	0.031726	0.834028	651	2
WNK4	6	0.93782	0.93783	1	15867	1	0.0085864	0.031819	0.834028	652	4
CAND1	6	0.93839	0.93841	1	15877	1	0.0086062	0.031867	0.834028	653	5
WSCD2	6	0.042282	0.12021	0.931741	2219	2	0.0086104	0.031882	0.834028	654	3
KCTD7	6	0.85425	0.87474	1	14636	1	0.0086314	0.031949	0.834028	655	4
GHRL	3	0.93151	0.9319	1	15745	0	0.0086431	0.031985	0.834028	656	2
PLEKHH1	6	0.92021	0.92191	1	15541	1	0.0086453	0.031991	0.834028	657	3
STK11IP	6	0.41719	0.59653	1	9637	2	0.0086503	0.032005	0.834028	658	4
INS	3	0.67195	0.77157	1	12689	1	0.0086641	0.032064	0.834028	659	2
CCDC62	6	0.41196	0.59313	1	9569	1	0.0086649	0.032066	0.834028	660	5
APOF	5	0.102	0.23444	1	3929	3	0.0086704	0.03208	0.834028	661	2
GNL3L	6	0.015887	0.053835	0.746736	1242	5	0.0086741	0.032092	0.834028	662	1
UNC93A	6	0.40745	0.59017	1	9516	2	0.0086765	0.0321	0.834028	663	3
PQLC1	6	0.99599	0.99592	1	17140	0	0.0086977	0.03216	0.834028	664	5
CHST3	5	0.93096	0.93138	1	15736	0	0.0087026	0.032177	0.834028	665	2
COLEC11	6	0.9102	0.91355	1	15368	1	0.0087394	0.032292	0.835434	666	3
PDLIM3	6	0.081274	0.19699	1	3380	3	0.0087529	0.032346	0.835434	667	3
LAD1	6	0.88289	0.89316	1	14977	1	0.0087974	0.032494	0.835434	668	5
SYCP1	4	0.17618	0.34473	1	5563	1	0.008827	0.032606	0.835434	669	3
IL1A	5	0.65748	0.7613	1	12513	1	0.0088572	0.0327	0.835434	670	4
FBLIM1	5	0.8674	0.88298	1	14779	1	0.0088576	0.0327	0.835434	671	4
PRPSAP2	6	0.63176	0.74348	1	12196	1	0.0088698	0.032746	0.835434	672	4
ENTHD2	6	0.51412	0.66184	1	10739	1	0.0088741	0.032761	0.835434	673	5
DUS4L	2	0.99112	0.99099	1	17017	0	0.008876	0.032768	0.835434	674	2
TMEM66	6	0.94802	0.94796	1	16050	0	0.0088796	0.032777	0.835434	675	4
KRCC1	1	0.99111	0.99099	1	17016	0	0.0088863	0.032799	0.835434	676	1
ALOX15B	6	0.96839	0.96832	1	16502	0	0.0088932	0.032813	0.835434	677	5
SCAF4	6	0.90767	0.91151	1	15340	1	0.0089126	0.032877	0.835852	678	5
DACT3	6	0.92326	0.92449	1	15601	1	0.0089592	0.033008	0.837931	679	5
MRGPRF	6	0.40707	0.5899	1	9513	2	0.0089801	0.033071	0.838301	680	2
ACTL6B	6	0.79959	0.8446	1	14040	1	0.0090121	0.03317	0.839585	681	5
RNPEPL1	6	0.98596	0.98587	1	16890	0	0.0090452	0.033278	0.839898	682	5
SYNE1	6	0.87455	0.88762	1	14872	1	0.0090544	0.033306	0.839898	683	4
IGFL3	1	0.99094	0.99081	1	17011	0	0.0090615	0.033329	0.839898	684	1
C2orf40	2	0.80771	0.84864	1	14110	0	0.009101	0.033463	0.841248	685	1
KIAA1614	6	0.37037	0.55517	1	8902	1	0.0091156	0.033506	0.841248	686	4
SYTL4	6	0.54953	0.6859	1	11219	1	0.0091892	0.033749	0.841248	687	4
TSC22D4	6	0.35068	0.53577	1	8603	1	0.0091935	0.033758	0.841248	688	5
CDC5L	6	0.045593	0.12713	0.94066	2325	4	0.0091958	0.033764	0.841248	689	1
OR12D3	4	0.98999	0.98988	1	16989	0	0.0091981	0.033769	0.841248	690	4
DNAH8	6	0.03148	0.096761	0.877246	1899	2	0.0091989	0.033771	0.841248	691	3
ZNF512	6	0.91273	0.91561	1	15408	1	0.0091995	0.033773	0.841248	692	5
HPCAL4	5	0.83134	0.8614	1	14358	1	0.0092552	0.033971	0.842387	693	4
MFSD1	4	0.28926	0.47268	1	7562	2	0.0092755	0.034028	0.842387	694	2
RHOC	6	0.63005	0.74229	1	12171	1	0.009281	0.034043	0.842387	695	5
MVB12A	6	0.96176	0.9617	1	16357	0	0.0092856	0.034056	0.842387	696	4
IL37	2	0.99071	0.99059	1	17005	0	0.0092882	0.034063	0.842387	697	2
SNAPIN	6	0.99035	0.99023	1	16996	0	0.0093207	0.034162	0.842654	698	5
CTSC	6	0.50742	0.65734	1	10656	1	0.0093238	0.034172	0.842654	699	5
PLEKHO1	6	0.9705	0.9704	1	16540	0	0.0093621	0.034289	0.844077	700	4
TBC1D2B	6	0.48353	0.64159	1	10410	2	0.0093723	0.034327	0.844077	701	3
DCC	6	0.71152	0.80043	1	13232	1	0.009421	0.034478	0.844635	702	3
RAB33A	6	0.18179	0.35133	1	5658	3	0.0094524	0.034571	0.844635	703	3
PON1	6	0.29176	0.47529	1	7601	2	0.0094566	0.034581	0.844635	704	4
TMCO5A	6	0.52716	0.67064	1	10901	1	0.0094693	0.034619	0.844635	705	5
MNF1	5	0.84704	0.87045	1	14560	1	0.0094834	0.034655	0.844635	706	4
CHRM1	6	0.71866	0.80584	1	13333	1	0.0094982	0.034699	0.844635	707	5
SCG5	3	0.9905	0.99038	1	16997	0	0.009504	0.034725	0.844635	708	3
ST3GAL6	4	0.9114	0.91455	1	15385	0	0.0095103	0.034742	0.844635	709	3
NRK	6	0.98509	0.98499	1	16863	0	0.00954	0.034847	0.844924	710	4
SERPINC1	6	0.89259	0.90006	1	15110	1	0.0095457	0.034872	0.844924	711	5
LRRC25	6	0.99495	0.99488	1	17108	0	0.0095728	0.034944	0.844924	712	5
SLC22A3	6	0.93631	0.93637	1	15830	1	0.0095821	0.034979	0.844924	713	5
PACRG	6	0.50883	0.65831	1	10676	1	0.0095913	0.035006	0.844924	714	5
C7orf31	6	0.98008	0.98004	1	16743	0	0.0096099	0.035064	0.844924	715	5
TP53I3	6	0.33212	0.5171	1	8316	1	0.0096208	0.035097	0.844924	716	5
ACY1	6	0.552	0.6876	1	11244	2	0.0096404	0.035158	0.845209	717	4
MTRF1	6	0.71307	0.80158	1	13256	2	0.0096865	0.03529	0.847217	718	3
ALX4	6	0.93535	0.93547	1	15804	1	0.0097601	0.035525	0.850218	719	5
VSX2	6	0.41086	0.59244	1	9556	1	0.0097825	0.035594	0.850218	720	5
TMPRSS11D	6	0.99613	0.99608	1	17145	0	0.009795	0.035637	0.850218	721	5
ERC2	6	0.99236	0.99223	1	17047	0	0.0097977	0.035641	0.850218	722	5
KDM5A	6	0.99381	0.99368	1	17084	0	0.0098045	0.035662	0.850218	723	5
SEMA7A	6	0.93878	0.93877	1	15887	1	0.0098396	0.035771	0.851055	724	5
WDR43	6	0.0087113	0.031818	0.621463	881	4	0.0098477	0.035796	0.851055	725	1
DAZAP1	6	0.37465	0.55946	1	8966	1	0.0099	0.035965	0.853671	726	5
FSD2	6	0.51401	0.66177	1	10737	1	0.0099128	0.036005	0.853671	727	3
WNK2	6	0.90203	0.9071	1	15243	1	0.0099345	0.036085	0.854389	728	5
ACPL2	6	0.84864	0.87139	1	14578	1	0.0099675	0.036198	0.854833	729	5
NLRP7	6	0.61066	0.72887	1	11949	2	0.009978	0.036229	0.854833	730	3
AGBL3	6	0.023904	0.076767	0.823133	1603	4	0.010012	0.036334	0.854833	731	2
PROK1	5	0.2253	0.4014	1	6441	1	0.010019	0.036361	0.854833	732	3
CARD14	6	0.87491	0.88786	1	14878	1	0.010042	0.036441	0.854833	733	5
LRTOMT	6	0.64337	0.75147	1	12345	2	0.010043	0.036442	0.854833	734	3
C14orf28	1	0.98995	0.98985	1	16987	0	0.010047	0.036451	0.854833	735	1
CDC23	6	0.91969	0.92145	1	15531	1	0.010108	0.036636	0.855196	736	4
FADS6	6	0.086521	0.20665	1	3536	3	0.010138	0.036724	0.855196	737	2
TMEM59	6	0.96562	0.96559	1	16446	0	0.010155	0.036771	0.855196	738	5
HIST1H3G	1	0.98984	0.98974	1	16985	0	0.010157	0.036774	0.855196	739	1
STOX2	6	0.24024	0.41857	1	6687	3	0.01016	0.036783	0.855196	740	3
AMER1	5	0.4237	0.60086	1	9706	2	0.01017	0.036817	0.855196	741	3
DNASE1L2	6	0.18479	0.35471	1	5714	3	0.010173	0.036826	0.855196	742	2
APLNR	6	0.47959	0.63896	1	10360	2	0.010185	0.036863	0.855196	743	4
FAM170B	6	0.69735	0.78998	1	13042	2	0.010226	0.036993	0.855765	744	3
ANKS1A	6	0.80927	0.84944	1	14129	1	0.010235	0.037025	0.855765	745	5
FAM107A	6	0.068306	0.17289	0.992405	3002	2	0.010239	0.037037	0.855765	746	3
COL10A1	6	0.11174	0.25146	1	4174	3	0.010259	0.037101	0.856104	747	3
DISP2	6	0.34106	0.52612	1	8454	1	0.010283	0.037179	0.85676	748	5
BRD4	6	0.41232	0.59338	1	9577	2	0.010304	0.037247	0.857183	749	1
PTCHD1	6	0.51181	0.66027	1	10716	2	0.010366	0.03744	0.859467	750	3
APOD	6	0.23444	0.41198	1	6583	2	0.010369	0.03745	0.859467	751	4
MAP7D1	6	0.69625	0.78916	1	13029	2	0.01041	0.037552	0.859467	752	3
KHK	6	0.80856	0.8491	1	14124	1	0.010432	0.037633	0.859467	753	4
APCDD1	6	0.98632	0.98624	1	16899	0	0.010435	0.037644	0.859467	754	5
COL3A1	6	0.47548	0.63612	1	10308	2	0.01044	0.037663	0.859467	755	4
MPV17L2	6	0.78858	0.83911	1	13951	1	0.010451	0.037696	0.859467	756	5
SERHL2	4	0.0062316	0.023792	0.555696	738	2	0.010493	0.037816	0.860466	757	2
DENND3	6	0.21674	0.39171	1	6292	2	0.010507	0.037861	0.860466	758	4
DHRS13	6	0.55689	0.69101	1	11296	1	0.010516	0.037889	0.860466	759	5
TMEM63B	6	0.8848	0.89444	1	15003	1	0.01054	0.037963	0.860821	760	4
SLC25A27	6	0.069799	0.17574	0.992853	3051	3	0.010564	0.038034	0.860821	761	3
CAP1	4	0.78593	0.83771	1	13929	1	0.010571	0.038055	0.860821	762	3
PSD3	6	0.95154	0.95148	1	16133	0	0.010593	0.038128	0.861354	763	4
KY	6	0.91734	0.9194	1	15487	1	0.010616	0.03821	0.861807	764	5
DYSF	6	0.45436	0.62169	1	10053	2	0.010629	0.038248	0.861807	765	4
IL27RA	6	0.63483	0.74562	1	12228	2	0.010669	0.038382	0.863693	766	3
NKX3-2	6	0.088342	0.20999	1	3589	3	0.010694	0.038463	0.864387	767	2
MAP7D2	6	0.98937	0.98926	1	16973	0	0.01076	0.038667	0.865794	768	5
STON2	6	0.74035	0.81672	1	13533	1	0.010789	0.038751	0.865794	769	4
CNNM3	6	0.53034	0.67272	1	10957	1	0.010815	0.038829	0.865794	770	4
ROCK1	6	0.99585	0.99578	1	17134	0	0.010826	0.038859	0.865794	771	5
TMEM253	6	0.21985	0.39527	1	6339	1	0.010831	0.038872	0.865794	772	5
DCLK2	6	0.75344	0.82247	1	13643	1	0.010865	0.038976	0.865794	773	5
AGGF1	3	0.84437	0.86887	1	14529	0	0.010883	0.039024	0.865794	774	1
CDC25C	6	0.9532	0.95315	1	16168	0	0.010887	0.039037	0.865794	775	4
CDO1	6	0.92008	0.92178	1	15538	1	0.010952	0.039246	0.865794	776	3
SLC4A7	6	0.56529	0.69686	1	11392	1	0.011001	0.039402	0.865794	777	5
SENP8	4	0.91148	0.91461	1	15386	0	0.011014	0.039442	0.865794	778	3
CCNO	6	0.17441	0.34269	1	5538	1	0.01109	0.039667	0.865794	779	4
VWA3B	6	0.0093914	0.03396	0.631468	926	2	0.011094	0.039681	0.865794	780	3
MSRB3	6	0.60509	0.72488	1	11863	2	0.011145	0.039828	0.865794	781	3
MRPL10	5	0.51977	0.66563	1	10816	2	0.011147	0.039831	0.865794	782	1
FXYD4	5	0.9737	0.97365	1	16601	0	0.01115	0.039837	0.865794	783	4
SCG3	5	0.97604	0.97601	1	16651	0	0.011193	0.039961	0.865794	784	4
ZNF276	6	0.20729	0.38089	1	6115	2	0.011203	0.039996	0.865794	785	3
C5AR2	6	0.54138	0.68034	1	11104	1	0.011211	0.040024	0.865794	786	3
KIAA1549L	6	0.55431	0.68921	1	11277	2	0.011215	0.040037	0.865794	787	4
GRXCR2	6	0.33231	0.5173	1	8320	1	0.011231	0.040083	0.865794	788	4
DTX3L	6	0.69849	0.7908	1	13054	1	0.011243	0.040115	0.865794	789	5
KLHL2	6	0.82097	0.85564	1	14243	1	0.011247	0.040129	0.865794	790	5
RPS19BP1	5	0.0059891	0.022989	0.549622	720	3	0.011252	0.040144	0.865794	791	2
SGPP1	6	0.55438	0.68925	1	11278	2	0.011278	0.040218	0.865794	792	2
MET	6	0.64807	0.75472	1	12408	2	0.01128	0.040225	0.865794	793	3
DGKH	6	0.75004	0.82095	1	13617	1	0.011292	0.040259	0.865794	794	5
TMEM165	6	0.97994	0.97991	1	16738	0	0.011327	0.040362	0.865794	795	5
NLRP2	6	0.48361	0.64165	1	10414	2	0.011334	0.040385	0.865794	796	4
C5orf51	5	0.090363	0.21362	1	3635	1	0.011341	0.040408	0.865794	797	3
NINJ1	6	0.11051	0.24938	1	4140	2	0.01137	0.040482	0.865794	798	3
ZNF346	6	0.15702	0.32229	1	5244	2	0.011378	0.040505	0.865794	799	4
SCAMP3	6	0.32373	0.50856	1	8167	3	0.01139	0.040535	0.865794	800	3
BTBD16	6	0.33083	0.51579	1	8294	2	0.011403	0.040572	0.865794	801	3
DTD1	6	0.63208	0.74371	1	12200	1	0.011405	0.040581	0.865794	802	5
PIWIL3	6	0.32333	0.50815	1	8159	2	0.011411	0.040596	0.865794	803	3
HSPA12A	6	0.079384	0.1935	1	3313	3	0.011425	0.040632	0.865794	804	3
R3HDM4	6	0.092047	0.21665	1	3684	3	0.011428	0.04064	0.865794	805	2
GABRG1	6	0.15818	0.32365	1	5263	1	0.011461	0.040739	0.865794	806	4
SRCIN1	6	0.6669	0.76801	1	12635	2	0.011462	0.04074	0.865794	807	4
GKN2	3	0.98853	0.98842	1	16958	0	0.01147	0.040765	0.865794	808	3
SAP30L	6	0.94519	0.94515	1	15981	0	0.011476	0.040783	0.865794	809	3
TMEM170B	6	0.8373	0.86475	1	14434	1	0.011519	0.040899	0.865794	810	5
EFCAB4B	6	0.97331	0.97325	1	16587	0	0.011524	0.040913	0.865794	811	5
SYT11	6	0.9406	0.94058	1	15923	0	0.011541	0.04097	0.865794	812	2
JRKL	4	0.91822	0.92016	1	15504	0	0.011543	0.040979	0.865794	813	3
SPTBN2	6	0.63041	0.74253	1	12174	1	0.011554	0.041015	0.865794	814	3
SP1	6	0.96013	0.96008	1	16324	0	0.01158	0.041095	0.865794	815	5
EXO1	6	0.91184	0.91489	1	15392	1	0.011593	0.041129	0.865794	816	5
MAP2K2	5	0.10604	0.24152	1	4038	2	0.011593	0.04113	0.865794	817	3
IL1RN	6	0.9275	0.92825	1	15672	1	0.011597	0.041143	0.865794	818	4
BUB1B	6	0.028778	0.090203	0.866598	1788	5	0.011606	0.041171	0.865794	819	1
FAM160B2	6	0.086125	0.20591	1	3515	1	0.011691	0.041413	0.865794	820	4
USP44	6	0.94667	0.94663	1	16024	0	0.01171	0.041477	0.865794	821	4
TCEAL4	4	0.61754	0.73384	1	12034	1	0.011711	0.041479	0.865794	822	3
LRRC8D	5	0.87281	0.88654	1	14847	1	0.011736	0.041564	0.865794	823	4
MXI1	6	0.87713	0.88931	1	14915	1	0.011736	0.041564	0.865794	824	4
GEM	6	0.98664	0.98657	1	16906	0	0.011752	0.041607	0.865794	825	5
FMNL2	6	0.97312	0.97306	1	16582	0	0.011757	0.04162	0.865794	826	4
CR1	6	0.98892	0.98883	1	16967	0	0.011758	0.041621	0.865794	827	5
CATSPER2	2	0.98824	0.98814	1	16952	0	0.011759	0.041625	0.865794	828	2
NEK6	6	0.96804	0.96799	1	16493	0	0.011775	0.04167	0.865794	829	5
OR5B12	2	0.91506	0.91749	1	15453	0	0.011781	0.04169	0.865794	830	2
KRTAP10-4	1	0.98817	0.98807	1	16950	0	0.011832	0.041856	0.867941	831	1
MBLAC1	5	0.26368	0.4451	1	7098	3	0.011852	0.041923	0.867941	832	1
ZDHHC3	6	0.85774	0.87689	1	14677	1	0.01186	0.041944	0.867941	833	5
OR52J3	2	0.93771	0.93773	1	15863	0	0.011911	0.042095	0.86942	834	2
CLK2	6	0.22172	0.39734	1	6379	1	0.011916	0.042117	0.86942	835	5
NEK11	6	0.824	0.8573	1	14279	1	0.011964	0.042273	0.871613	836	5
OTX1	6	0.19845	0.37058	1	5950	2	0.012009	0.042411	0.872194	837	3
SYNE3	6	0.95389	0.95384	1	16185	0	0.012032	0.042466	0.872194	838	5
TRIM55	6	0.99647	0.99641	1	17149	0	0.012038	0.042484	0.872194	839	5
MICAL2	6	0.98677	0.98671	1	16910	0	0.012061	0.042562	0.872194	840	3
ZYG11A	6	0.95504	0.95502	1	16211	0	0.012108	0.042707	0.872194	841	4
CA5B	5	0.93805	0.93806	1	15872	0	0.012123	0.042751	0.872194	842	2
HELZ	6	0.79816	0.84388	1	14024	1	0.012125	0.042758	0.872194	843	3
TSC2	6	0.9214	0.92293	1	15565	1	0.012126	0.042759	0.872194	844	3
UBXN10	6	0.92302	0.92429	1	15596	1	0.012141	0.042796	0.872194	845	4
UBE2D1	6	0.99438	0.99427	1	17098	0	0.012145	0.042808	0.872194	846	5
LTBP2	6	0.12351	0.27183	1	4498	1	0.012163	0.042871	0.872462	847	5
CCR3	5	0.92698	0.92778	1	15663	0	0.012177	0.042926	0.872542	848	2
OR4C6	3	0.50415	0.65519	1	10619	1	0.012225	0.043064	0.872782	849	2
RPH3A	6	0.86861	0.88374	1	14804	1	0.012259	0.043166	0.872782	850	5
AHCTF1	3	0.98773	0.98767	1	16936	0	0.012266	0.043189	0.872782	851	3
FLI1	6	0.57149	0.70118	1	11474	1	0.012272	0.043204	0.872782	852	3
LDLRAD4	6	0.64685	0.75388	1	12397	2	0.012298	0.043279	0.872782	853	2
FOXD3	6	0.85724	0.87657	1	14669	1	0.012308	0.043314	0.872782	854	5
TNFRSF12A	6	0.35561	0.54063	1	8688	2	0.012321	0.043356	0.872782	855	4
ANKDD1B	6	0.9757	0.97567	1	16644	0	0.012338	0.043406	0.872782	856	5
EXT1	6	0.9938	0.99367	1	17083	0	0.012342	0.043421	0.872782	857	5
RAPGEF1	6	0.11044	0.24925	1	4135	3	0.012351	0.043444	0.872782	858	3
COL17A1	6	0.56235	0.69478	1	11356	2	0.01242	0.043672	0.87633	859	3
CMIP	6	0.14246	0.30364	1	4967	3	0.012451	0.043776	0.87642	860	3
ACOX2	6	0.75116	0.82145	1	13627	1	0.012455	0.043793	0.87642	861	4
KIAA2018	5	0.89842	0.90438	1	15188	1	0.01249	0.0439	0.87642	862	4
METTL6	3	0.96202	0.96197	1	16367	0	0.012495	0.043915	0.87642	863	3
ACAA1	6	0.11985	0.26553	1	4384	2	0.012507	0.043952	0.87642	864	4
ANXA7	6	0.75932	0.82506	1	13683	1	0.012517	0.043988	0.87642	865	4
BRWD3	6	0.98106	0.98103	1	16767	0	0.01254	0.044045	0.87642	866	4
GHR	5	0.38215	0.56692	1	9100	1	0.012583	0.044173	0.87642	867	3
DIABLO	6	0.66849	0.76912	1	12651	1	0.012586	0.044183	0.87642	868	4
WFDC1	6	0.97715	0.9771	1	16680	0	0.012586	0.044185	0.87642	869	5
MAGEB10	5	0.41136	0.59275	1	9565	1	0.012616	0.044268	0.877063	870	3
BZRAP1	6	0.88672	0.89579	1	15027	1	0.012642	0.044341	0.877499	871	5
SULT4A1	6	0.18996	0.36077	1	5807	3	0.012711	0.044555	0.877846	872	3
NEU1	6	0.42354	0.60076	1	9704	2	0.012723	0.044592	0.877846	873	4
ASTE1	6	0.96243	0.9624	1	16379	0	0.012726	0.044599	0.877846	874	5
PARP12	6	0.99004	0.98993	1	16991	0	0.012779	0.044746	0.877846	875	4
NT5C1A	6	0.87829	0.89004	1	14925	1	0.012793	0.044788	0.877846	876	5
COL12A1	6	0.69516	0.78838	1	13013	1	0.012868	0.045029	0.877846	877	4
MPHOSPH10	3	0.056506	0.14961	0.969108	2661	1	0.012871	0.045034	0.877846	878	1
BPHL	6	0.3919	0.57672	1	9273	2	0.012886	0.045071	0.877846	879	3
TMEM208	6	0.80396	0.84679	1	14068	1	0.012899	0.045112	0.877846	880	5
USP46	6	0.21315	0.38759	1	6226	3	0.012904	0.045124	0.877846	881	2
PPT2	6	0.43676	0.60965	1	9838	1	0.012906	0.045127	0.877846	882	3
FBXO42	6	0.9876	0.98754	1	16928	0	0.012907	0.045127	0.877846	883	5
AKIP1	6	0.96745	0.96742	1	16482	0	0.012909	0.045133	0.877846	884	3
UBQLN2	6	0.29391	0.47758	1	7638	3	0.012912	0.045147	0.877846	885	2
TRIM68	6	0.95673	0.95669	1	16254	0	0.012964	0.04531	0.877846	886	3
METTL25	6	0.80372	0.84667	1	14067	1	0.012971	0.045335	0.877846	887	4
MAGI3	6	0.29991	0.48389	1	7736	2	0.012983	0.045376	0.877846	888	3
WBSCR28	3	0.22558	0.40171	1	6448	1	0.012985	0.045378	0.877846	889	2
SLC29A4	5	0.1535	0.31816	1	5175	3	0.01299	0.045393	0.877846	890	2
SLC4A9	6	0.85477	0.87506	1	14645	1	0.013029	0.045515	0.877846	891	4
APCS	2	0.98694	0.98689	1	16919	0	0.013056	0.045596	0.877846	892	2
RIPK1	6	0.4983	0.65138	1	10552	1	0.013069	0.04564	0.877846	893	5
SBSPON	6	0.80618	0.84788	1	14094	1	0.013077	0.045661	0.877846	894	5
TMEM205	6	0.55006	0.68625	1	11222	2	0.01309	0.0457	0.877846	895	4
C7orf63	6	0.44059	0.61235	1	9881	2	0.013101	0.045725	0.877846	896	2
PDE6A	6	0.99348	0.99334	1	17075	0	0.013105	0.045738	0.877846	897	5
UTF1	6	0.1444	0.30679	1	5005	2	0.013108	0.045747	0.877846	898	3
CRYBA2	6	0.93479	0.93493	1	15794	1	0.01312	0.045784	0.877846	899	5
DENND4B	6	0.64471	0.7524	1	12365	2	0.013166	0.045924	0.878312	900	2
TMEM74B	5	0.91865	0.92052	1	15514	0	0.013201	0.04604	0.878312	901	3
KBTBD6	4	0.949	0.94896	1	16072	0	0.01321	0.046073	0.878312	902	3
RSBN1L	6	0.57848	0.70602	1	11548	1	0.013216	0.04609	0.878312	903	5
TMEM225	3	0.61189	0.72978	1	11971	1	0.01323	0.046118	0.878312	904	1
NTHL1	6	0.79413	0.8419	1	13993	1	0.013252	0.046182	0.878312	905	5
RALGAPA1	4	0.92233	0.92368	1	15583	0	0.013263	0.046206	0.878312	906	3
KRTAP24-1	3	0.98673	0.98667	1	16908	0	0.013265	0.046216	0.878312	907	3
SOCS3	6	0.72072	0.80745	1	13362	2	0.013296	0.046306	0.878613	908	2
KANK1	6	0.48821	0.64467	1	10454	1	0.013309	0.046343	0.878613	909	5
SYNPO	6	0.13101	0.28453	1	4676	2	0.013368	0.046504	0.878613	910	2
YIPF6	5	0.83416	0.86296	1	14398	1	0.01337	0.046506	0.878613	911	3
GNAS	6	0.18838	0.3589	1	5773	2	0.013382	0.046534	0.878613	912	4
RRAGA	6	0.25383	0.43405	1	6927	2	0.013384	0.046538	0.878613	913	4
LRRC72	6	0.21374	0.38827	1	6235	1	0.01342	0.046638	0.879547	914	5
TMEM109	6	0.51451	0.66212	1	10745	1	0.013469	0.046792	0.881475	915	5
NMRK2	6	0.99396	0.99386	1	17087	0	0.013506	0.046899	0.881536	916	5
ARSJ	6	0.97103	0.97095	1	16547	0	0.01352	0.04693	0.881536	917	5
NOP58	6	0.056788	0.15016	0.970588	2665	3	0.013556	0.047026	0.881536	918	2
FLCN	6	0.91394	0.91657	1	15429	1	0.013567	0.047062	0.881536	919	4
HES1	6	0.99338	0.99325	1	17072	0	0.013586	0.04712	0.881536	920	5
CD81	6	0.96421	0.96422	1	16412	0	0.013596	0.04715	0.881536	921	4
ANO10	6	0.83054	0.86092	1	14345	1	0.013619	0.047233	0.881536	922	4
RBM25	6	0.13955	0.29882	1	4901	3	0.013621	0.047239	0.881536	923	1
PARPBP	5	0.26769	0.44951	1	7171	1	0.01364	0.047299	0.881536	924	3
KCNE1	4	0.41284	0.59371	1	9587	2	0.013645	0.047306	0.881536	925	2
KCNN3	6	0.40681	0.58973	1	9511	1	0.013686	0.04744	0.883075	926	4
ABCB8	6	0.16815	0.3353	1	5430	2	0.01374	0.047601	0.883618	927	2
SAPCD1	4	0.82881	0.85997	1	14327	1	0.013748	0.047622	0.883618	928	3
GOSR1	6	0.16236	0.32856	1	5337	3	0.013751	0.04763	0.883618	929	3
RABGAP1L	6	0.90309	0.90791	1	15259	1	0.013772	0.047699	0.883618	930	5
TXNRD1	6	0.012828	0.044537	0.697898	1100	2	0.01378	0.047726	0.883618	931	3
TSACC	5	0.25384	0.43406	1	6929	1	0.01381	0.047812	0.883762	932	4
FTO	6	0.68507	0.78096	1	12874	2	0.013816	0.047836	0.883762	933	3
GRAMD1A	6	0.98578	0.9857	1	16885	0	0.013864	0.048	0.883829	934	4
SLC51B	2	0.92782	0.92852	1	15682	0	0.01387	0.048013	0.883829	935	2
RASSF2	6	0.80967	0.84965	1	14135	1	0.013905	0.048127	0.883829	936	5
MRFAP1	4	0.98609	0.98601	1	16895	0	0.013906	0.04813	0.883829	937	4
PLG	5	0.80183	0.84573	1	14058	1	0.013907	0.048134	0.883829	938	3
MTFR2	4	0.51503	0.66246	1	10751	1	0.013921	0.048176	0.883829	939	2
CREBZF	5	0.98349	0.98343	1	16825	0	0.013933	0.048208	0.883829	940	4
IFT52	6	0.44031	0.61214	1	9878	2	0.013946	0.048258	0.883829	941	3
GPR113	6	0.97378	0.97373	1	16603	0	0.01397	0.048325	0.883829	942	3
NIPAL3	6	0.80557	0.84757	1	14085	1	0.013979	0.048352	0.883829	943	5
NLRP10	6	0.029172	0.091286	0.868674	1810	3	0.014011	0.048463	0.884503	944	2
RAET1E	3	0.98595	0.98586	1	16889	0	0.014052	0.048596	0.884503	945	3
ABLIM2	6	0.22836	0.40498	1	6490	1	0.014066	0.048649	0.884503	946	4
NSUN5	6	0.092749	0.21791	1	3706	2	0.014107	0.048784	0.884503	947	3
SUPT6H	6	0.14678	0.30988	1	5044	3	0.014117	0.048818	0.884503	948	2
BIVM	6	0.43887	0.61109	1	9860	2	0.014122	0.048834	0.884503	949	4
HOXD8	6	0.99447	0.99436	1	17102	0	0.014149	0.048906	0.884503	950	5
LY6G6F	6	0.99506	0.995	1	17112	0	0.014173	0.048971	0.884503	951	5
C1orf50	4	0.98581	0.98573	1	16887	0	0.014185	0.049003	0.884503	952	4
USP31	6	0.81998	0.85511	1	14231	1	0.014186	0.049007	0.884503	953	4
MID1	6	0.98955	0.98943	1	16980	0	0.014241	0.049177	0.884503	954	5
AGO3	6	0.57236	0.70176	1	11489	1	0.014262	0.049254	0.884503	955	5
POU5F2	6	0.94449	0.94443	1	15968	0	0.014265	0.049262	0.884503	956	4
WDSUB1	5	0.98234	0.98229	1	16800	0	0.014271	0.049291	0.884503	957	4
BMPR2	6	0.55034	0.68644	1	11227	1	0.014283	0.049327	0.884503	958	4
ACTN2	6	0.024162	0.077451	0.823133	1619	2	0.014305	0.049401	0.884503	959	3
IL12B	6	0.17234	0.34025	1	5495	2	0.014323	0.049448	0.884503	960	4
CHI3L2	6	0.23734	0.41525	1	6636	2	0.014335	0.049489	0.884503	961	4
STRN3	6	0.27333	0.45574	1	7293	1	0.014395	0.04966	0.884503	962	5
IQCD	6	0.35901	0.54403	1	8734	3	0.014454	0.049838	0.884503	963	3
CCDC84	6	0.0005855	0.0027057	0.203662	228	5	0.014465	0.049861	0.884503	964	1
QPCT	6	0.84401	0.86866	1	14521	1	0.014502	0.049969	0.884503	965	4
HNRNPF	5	0.8956	0.90229	1	15154	1	0.014512	0.049993	0.884503	966	2
AHNAK	6	0.55233	0.68783	1	11250	1	0.014516	0.050004	0.884503	967	5
ZMYM1	5	0.76318	0.82685	1	13708	1	0.014539	0.050069	0.884503	968	4
TTC6	6	0.7211	0.80775	1	13374	1	0.014542	0.050071	0.884503	969	4
OR2G6	3	0.98542	0.98532	1	16876	0	0.014579	0.050182	0.884503	970	3
ARL3	4	0.94295	0.94292	1	15953	0	0.014595	0.050228	0.884503	971	3
OR1N2	4	0.75097	0.82136	1	13624	1	0.014615	0.050278	0.884503	972	2
C1orf162	5	0.36735	0.5522	1	8848	2	0.014615	0.050278	0.884503	973	3
NIPAL4	6	0.44656	0.61639	1	9967	1	0.014623	0.050302	0.884503	974	5
PTPRF	6	0.60709	0.72633	1	11901	1	0.014647	0.050368	0.884503	975	5
RANBP17	6	0.053881	0.14431	0.965621	2576	2	0.01465	0.050374	0.884503	976	3
RAG1	6	0.9668	0.96678	1	16465	0	0.014654	0.050381	0.884503	977	4
SEC61A2	6	0.53799	0.67796	1	11061	2	0.01466	0.050396	0.884503	978	3
CLPS	4	0.77958	0.83465	1	13862	1	0.014663	0.050404	0.884503	979	3
CWH43	6	0.30599	0.49018	1	7854	1	0.014685	0.050469	0.884503	980	5
KCNC2	6	0.39264	0.57746	1	9291	1	0.014687	0.050473	0.884503	981	3
MBD5	6	0.9914	0.99129	1	17022	0	0.014755	0.05067	0.884503	982	5
PREX2	6	0.31675	0.5015	1	8046	2	0.01479	0.05079	0.884503	983	2
RFX1	6	0.021804	0.070943	0.818073	1492	4	0.014836	0.050921	0.884503	984	2
CPNE9	6	0.91997	0.9217	1	15536	1	0.014855	0.050979	0.884503	985	5
SLCO3A1	6	0.42208	0.59978	1	9688	1	0.014896	0.051097	0.884503	986	4
TPBGL	4	0.9851	0.98501	1	16866	0	0.014897	0.051101	0.884503	987	4
FRMPD3	6	0.5802	0.7072	1	11571	1	0.014902	0.051119	0.884503	988	3
ARHGEF9	6	0.67024	0.77036	1	12670	1	0.014911	0.051145	0.884503	989	4
SFRP2	6	0.31956	0.50438	1	8102	2	0.01492	0.051168	0.884503	990	2
APOC4	6	0.96187	0.96182	1	16360	0	0.014956	0.051281	0.884503	991	5
LCN15	6	0.24361	0.42239	1	6738	2	0.014959	0.051292	0.884503	992	2
TEX9	5	0.92867	0.92928	1	15695	0	0.014977	0.051332	0.884503	993	3
LRCH2	6	0.16877	0.33602	1	5436	2	0.014987	0.051363	0.884503	994	3
NOS1	6	0.14345	0.30521	1	4983	1	0.015031	0.0515	0.884503	995	4
GRM5	6	0.086276	0.20621	1	3521	3	0.015035	0.051509	0.884503	996	3
HPN	6	0.99571	0.99564	1	17132	0	0.015045	0.051539	0.884503	997	5
CEP55	4	0.67488	0.77367	1	12734	1	0.015048	0.051552	0.884503	998	2
OSBPL6	6	0.44112	0.6127	1	9890	2	0.015049	0.051557	0.884503	999	4
C16orf91	6	0.095018	0.22202	1	3757	1	0.01505	0.051559	0.884503	1000	5
C5orf49	5	0.93684	0.93689	1	15843	0	0.015071	0.051628	0.884503	1001	4
YOD1	6	0.74293	0.81785	1	13554	1	0.015073	0.051631	0.884503	1002	3
SSX2IP	2	0.9849	0.9848	1	16859	0	0.015097	0.051703	0.884503	1003	2
APLP2	6	0.97962	0.97961	1	16727	0	0.015106	0.051734	0.884503	1004	5
RAP1GDS1	6	0.68465	0.78066	1	12863	1	0.015114	0.05176	0.884503	1005	1
KCTD5	4	0.98487	0.98476	1	16858	0	0.015133	0.051817	0.884503	1006	4
DYTN	6	0.90438	0.90892	1	15281	1	0.015133	0.051817	0.884503	1007	4
TTYH3	6	0.79597	0.84278	1	14008	1	0.015153	0.051872	0.884503	1008	5
PPEF1	6	0.15778	0.32316	1	5255	1	0.015176	0.051931	0.884503	1009	3
FBXW11	4	0.96033	0.96028	1	16329	0	0.015188	0.051967	0.884503	1010	3
ELL2	6	0.28687	0.47012	1	7520	2	0.015204	0.052015	0.884503	1011	4
GAR1	3	0.98479	0.9847	1	16857	0	0.015206	0.052022	0.884503	1012	3
SMURF1	6	0.74977	0.82083	1	13613	1	0.015214	0.052044	0.884503	1013	4
SLC15A5	6	0.25689	0.43748	1	6982	2	0.015244	0.052126	0.884503	1014	3
SGSH	6	0.347	0.53201	1	8538	2	0.015258	0.052164	0.884503	1015	4
CLTA	6	0.96386	0.96386	1	16404	0	0.01526	0.052172	0.884503	1016	5
DNAJC14	6	0.71754	0.80495	1	13320	2	0.015265	0.052187	0.884503	1017	3
TSTD1	6	0.98681	0.98674	1	16912	0	0.015296	0.052279	0.8852	1018	5
STXBP3	4	0.98465	0.98456	1	16854	0	0.015349	0.052443	0.886274	1019	4
ELF5	4	0.98464	0.98455	1	16853	0	0.015356	0.052462	0.886274	1020	4
GPD1	6	0.87165	0.88575	1	14837	1	0.015367	0.052497	0.886274	1021	5
SYDE1	6	0.71046	0.79964	1	13221	1	0.015443	0.052732	0.887964	1022	4
C12orf77	6	0.95133	0.95127	1	16125	0	0.015451	0.052752	0.887964	1023	5
ANO7	6	0.66979	0.77004	1	12667	1	0.015455	0.052768	0.887964	1024	5
RASSF7	6	0.88636	0.89555	1	15023	1	0.015468	0.052803	0.887964	1025	5
FAM194B	6	0.87608	0.88862	1	14894	1	0.015514	0.052949	0.88955	1026	4
SGK1	6	0.20055	0.37305	1	5984	1	0.015602	0.053225	0.890701	1027	5
ABHD12	6	0.91379	0.91646	1	15424	1	0.015633	0.053319	0.890701	1028	3
PIEZO2	6	0.96251	0.96247	1	16380	0	0.015677	0.053458	0.890701	1029	5
UHRF2	5	0.80112	0.84535	1	14049	1	0.015697	0.053523	0.890701	1030	3
TREML4	1	0.9843	0.98423	1	16847	0	0.015698	0.053525	0.890701	1031	1
DFNB31	6	0.97502	0.97499	1	16627	0	0.015707	0.053552	0.890701	1032	5
ZFP28	6	0.62091	0.73613	1	12067	1	0.015771	0.053744	0.890701	1033	4
TXNDC12	6	0.91829	0.92022	1	15506	1	0.015775	0.053761	0.890701	1034	5
IL33	2	0.98422	0.98415	1	16845	0	0.01578	0.053773	0.890701	1035	2
NFATC4	6	0.89031	0.89833	1	15083	1	0.015788	0.053795	0.890701	1036	5
KLHDC4	6	0.2914	0.47492	1	7592	2	0.015828	0.053902	0.890701	1037	2
APOA2	5	0.28855	0.47194	1	7547	2	0.015835	0.053921	0.890701	1038	3
CDHR5	6	0.32047	0.50531	1	8111	2	0.015852	0.053964	0.890701	1039	4
C21orf2	6	0.34962	0.53469	1	8581	2	0.015892	0.054096	0.890701	1040	3
FOXJ3	6	0.99317	0.99305	1	17066	0	0.015911	0.054153	0.890701	1041	3
DEFB132	4	0.18649	0.35669	1	5742	2	0.015914	0.054161	0.890701	1042	2
ASAH2	5	0.14653	0.30957	1	5038	2	0.015931	0.054216	0.890701	1043	3
BTBD18	5	0.81653	0.85322	1	14206	1	0.015937	0.054229	0.890701	1044	4
DPP6	6	0.11694	0.26058	1	4303	3	0.015957	0.054301	0.890701	1045	3
P2RY2	5	0.97304	0.97297	1	16578	0	0.015987	0.054389	0.890701	1046	3
MS4A8	6	0.54703	0.68421	1	11185	2	0.015999	0.054426	0.890701	1047	4
SIRT7	6	0.68501	0.78091	1	12871	2	0.016006	0.054447	0.890701	1048	3
PPP3CA	6	0.91257	0.91548	1	15405	1	0.016051	0.05457	0.890701	1049	5
KCNJ15	5	0.68518	0.78104	1	12875	1	0.016056	0.054584	0.890701	1050	4
CCDC82	5	0.24199	0.42053	1	6710	1	0.016058	0.05459	0.890701	1051	3
LacZ	96	0.41495	0.59508	1	9611	27	0.016059	0.054591	0.890701	1052	39
MBD3	6	0.70677	0.79685	1	13177	1	0.016106	0.054733	0.890701	1053	5
STK38	6	0.3941	0.5789	1	9326	1	0.016136	0.054804	0.890701	1054	5
FAM173B	6	0.76747	0.82891	1	13743	1	0.016146	0.054828	0.890701	1055	4
BAG3	6	0.21637	0.39129	1	6279	2	0.016209	0.055016	0.890701	1056	4
SLC39A8	3	0.98277	0.98271	1	16811	0	0.016235	0.055105	0.890701	1057	3
GPR112	6	0.64243	0.7508	1	12329	1	0.016287	0.055279	0.890701	1058	3
SPHK2	6	0.97656	0.97653	1	16663	0	0.016332	0.055412	0.890701	1059	5
OR13C4	4	0.98366	0.98361	1	16830	0	0.01634	0.055433	0.890701	1060	4
GCK	6	0.21094	0.38509	1	6180	3	0.016362	0.055497	0.890701	1061	3
CNTN3	6	0.53763	0.67772	1	11059	2	0.016365	0.055504	0.890701	1062	4
GLIPR1	6	0.99093	0.99081	1	17010	0	0.016373	0.055524	0.890701	1063	5
MYOM3	6	0.75676	0.82392	1	13669	1	0.016381	0.055549	0.890701	1064	5
BRIP1	6	0.33967	0.52475	1	8430	3	0.016411	0.055634	0.890701	1065	3
RESP18	6	0.97902	0.979	1	16715	0	0.016429	0.055683	0.890701	1066	5
CORO1A	6	0.08186	0.19803	1	3393	2	0.016453	0.055744	0.890701	1067	4
GIT1	6	0.080337	0.19528	1	3355	3	0.016471	0.055802	0.890701	1068	2
FBXO32	6	0.54848	0.6852	1	11202	2	0.016501	0.05589	0.890701	1069	3
SLAIN1	6	0.9787	0.97866	1	16705	0	0.016524	0.055964	0.890701	1070	5
RAP2C	5	0.11529	0.2577	1	4266	2	0.016538	0.056005	0.890701	1071	3
PAPSS1	6	0.62053	0.73585	1	12063	1	0.016541	0.056012	0.890701	1072	3
PSPC1	6	0.48478	0.64243	1	10419	1	0.016541	0.056015	0.890701	1073	5
DAB2	6	0.71086	0.79993	1	13225	2	0.016541	0.056015	0.890701	1074	3
CLCA4	6	0.30795	0.49226	1	7896	1	0.016554	0.05605	0.890701	1075	5
WHAMM	6	0.99104	0.99091	1	17013	0	0.016581	0.056124	0.890701	1076	4
STX17	3	0.98148	0.98143	1	16782	0	0.016587	0.056148	0.890701	1077	3
ICAM2	6	0.82973	0.86045	1	14335	1	0.016594	0.056176	0.890701	1078	4
AGBL4	6	0.88257	0.89297	1	14972	1	0.016605	0.056205	0.890701	1079	4
TPPP2	6	0.30005	0.48402	1	7740	1	0.01663	0.056265	0.890701	1080	3
WDPCP	6	0.9835	0.98344	1	16826	0	0.01666	0.05636	0.890701	1081	4
ZC2HC1C	5	0.0016688	0.0073659	0.323891	392	1	0.016661	0.056362	0.890701	1082	3
SWI5	6	0.0069537	0.026192	0.575855	784	3	0.01667	0.056385	0.890701	1083	2
ANHX	6	0.76363	0.82708	1	13715	1	0.016679	0.056408	0.890701	1084	5
ZMAT1	5	0.94444	0.94439	1	15967	0	0.016691	0.056434	0.890701	1085	4
SPICE1	6	0.18842	0.35895	1	5774	3	0.016735	0.056562	0.890701	1086	2
TXLNA	6	0.83309	0.86238	1	14385	1	0.016736	0.056564	0.890701	1087	5
INHBC	6	0.25475	0.43509	1	6946	2	0.016759	0.056618	0.890701	1088	4
RGL2	6	0.69372	0.78731	1	12989	1	0.016764	0.056634	0.890701	1089	4
TFCP2	6	0.81536	0.8526	1	14193	1	0.016769	0.056648	0.890701	1090	4
NBEAL2	6	0.87604	0.8886	1	14893	1	0.016798	0.05674	0.890701	1091	5
OR8D4	2	0.44153	0.61297	1	9896	1	0.016804	0.056753	0.890701	1092	1
SNX11	6	0.98099	0.98097	1	16763	0	0.016817	0.056797	0.890701	1093	4
C6orf62	5	0.32958	0.51453	1	8271	2	0.016825	0.056812	0.890701	1094	2
GDA	6	0.89844	0.90439	1	15189	1	0.016844	0.056878	0.890701	1095	4
LIMD2	6	0.93773	0.93775	1	15864	1	0.016858	0.056912	0.890701	1096	4
KCNQ5	6	0.018333	0.060984	0.778918	1349	2	0.016859	0.056916	0.890701	1097	2
MPV17	6	0.93525	0.93538	1	15799	1	0.016863	0.056921	0.890701	1098	3
ANKRD16	6	0.39331	0.57812	1	9306	2	0.016864	0.056925	0.890701	1099	3
FBXO43	5	0.061231	0.15897	0.971627	2812	3	0.016885	0.056991	0.890701	1100	2
GPX3	6	0.51641	0.66341	1	10770	2	0.016891	0.057008	0.890701	1101	4
NTN4	6	0.49817	0.65128	1	10551	2	0.016898	0.057028	0.890701	1102	4
C19orf80	6	0.96404	0.96405	1	16407	0	0.016904	0.057045	0.890701	1103	5
PYGB	6	0.40426	0.58804	1	9483	1	0.016929	0.057126	0.890701	1104	2
HOXA10	6	0.99617	0.99612	1	17146	0	0.016935	0.057142	0.890701	1105	5
APOM	6	0.51699	0.6638	1	10780	2	0.016942	0.057164	0.890701	1106	4
RBM26	6	0.96437	0.96437	1	16416	0	0.016961	0.057209	0.890701	1107	5
CLOCK	6	0.27883	0.46164	1	7382	1	0.016994	0.057304	0.890701	1108	4
H1F0	5	0.19578	0.36752	1	5901	2	0.01701	0.057352	0.890701	1109	3
MIIP	6	0.29999	0.48396	1	7738	2	0.017012	0.057358	0.890701	1110	4
MARCH2	6	0.84195	0.86743	1	14492	1	0.017046	0.057457	0.891111	1111	4
MYBBP1A	6	0.0079994	0.029599	0.606038	840	5	0.017059	0.057502	0.891111	1112	1
NTF3	4	0.86542	0.88174	1	14756	0	0.017085	0.057581	0.891111	1113	3
ZCCHC13	4	0.98289	0.98284	1	16814	0	0.017108	0.057644	0.891111	1114	4
TCP11	6	0.28093	0.46391	1	7419	3	0.017124	0.057699	0.891111	1115	3
NUDT8	6	0.75259	0.82209	1	13636	1	0.01713	0.057719	0.891111	1116	5
CYP1A1	6	0.79831	0.84397	1	14028	1	0.017161	0.057811	0.891111	1117	4
GPR22	1	0.98284	0.98278	1	16813	0	0.017165	0.057823	0.891111	1118	1
FNBP1	6	0.97504	0.97501	1	16629	0	0.017173	0.05785	0.891111	1119	5
GFAP	6	0.99432	0.99421	1	17096	0	0.017229	0.058004	0.891259	1120	5
NBEAL1	6	0.776	0.8329	1	13836	1	0.017241	0.058044	0.891259	1121	4
NRP2	6	0.5552	0.68981	1	11283	2	0.017268	0.05813	0.891259	1122	4
KRT81	4	0.98272	0.98267	1	16809	0	0.017276	0.058147	0.891259	1123	4
MOCOS	6	0.39097	0.57578	1	9257	3	0.017284	0.058169	0.891259	1124	3
CDON	6	0.29947	0.48342	1	7730	3	0.017318	0.058257	0.891259	1125	3
TSKS	6	0.92037	0.92205	1	15545	1	0.017334	0.058306	0.891259	1126	5
MIEN1	5	0.48996	0.64581	1	10473	2	0.017346	0.058352	0.891259	1127	3
KIF25	6	0.75795	0.82446	1	13675	1	0.017353	0.058373	0.891259	1128	5
FOXS1	4	0.83116	0.86129	1	14356	1	0.017378	0.058433	0.891259	1129	3
EPHA4	6	0.99606	0.99599	1	17142	0	0.017429	0.058574	0.891259	1130	5
GRIN2C	6	0.9956	0.99553	1	17126	0	0.017435	0.058586	0.891259	1131	5
OAZ2	6	0.9946	0.99449	1	17104	0	0.017447	0.058621	0.891259	1132	5
CLEC16A	6	0.4056	0.58891	1	9499	2	0.017468	0.05868	0.891259	1133	4
STYX	2	0.98252	0.98246	1	16807	0	0.01748	0.058712	0.891259	1134	2
KLF8	6	0.83063	0.86098	1	14347	1	0.01748	0.058712	0.891259	1135	5
ANKRD12	6	0.76857	0.82942	1	13753	1	0.017492	0.058738	0.891259	1136	5
MRC2	6	0.67396	0.77303	1	12715	2	0.017555	0.058938	0.891397	1137	3
PPFIBP2	6	0.64772	0.75449	1	12406	1	0.017558	0.05895	0.891397	1138	4
KIAA0226	6	0.95857	0.95853	1	16287	0	0.017562	0.058968	0.891397	1139	5
HUNK	6	0.7007	0.7924	1	13082	2	0.017566	0.058973	0.891397	1140	3
ISOC1	6	0.7407	0.81688	1	13536	1	0.017577	0.059006	0.891397	1141	2
RUFY2	6	0.98673	0.98667	1	16907	0	0.017642	0.059186	0.89333	1142	4
CYYR1	6	0.29132	0.47484	1	7590	1	0.017689	0.059321	0.893723	1143	5
EMD	6	0.34594	0.53098	1	8524	2	0.017706	0.059373	0.893723	1144	2
NDUFS3	6	0.09523	0.22239	1	3763	2	0.017771	0.059559	0.893723	1145	3
CCDC120	6	0.98679	0.98672	1	16911	0	0.017807	0.059651	0.893723	1146	5
APBB2	6	0.69413	0.78763	1	12996	1	0.017813	0.059667	0.893723	1147	4
ZNF687	6	0.45782	0.62403	1	10086	1	0.017814	0.059668	0.893723	1148	4
FTCD	6	0.3774	0.56221	1	9025	1	0.017826	0.059703	0.893723	1149	5
C4orf21	6	0.95251	0.95247	1	16154	0	0.017829	0.059709	0.893723	1150	5
HFE	6	0.41789	0.59698	1	9647	1	0.017835	0.059729	0.893723	1151	4
TXNDC17	6	0.13557	0.29223	1	4795	4	0.017836	0.05973	0.893723	1152	1
WDR37	6	0.98649	0.98641	1	16903	0	0.017914	0.05994	0.893773	1153	5
CD300A	4	0.96364	0.96364	1	16401	0	0.017946	0.060036	0.893773	1154	2
KLK9	5	0.11029	0.24898	1	4133	1	0.017965	0.060081	0.893773	1155	3
ZFYVE16	6	0.094776	0.22159	1	3752	1	0.017965	0.060081	0.893773	1156	4
AARSD1	6	0.82229	0.85637	1	14256	1	0.017966	0.060082	0.893773	1157	4
UBQLN3	6	0.43021	0.60521	1	9774	1	0.017972	0.060108	0.893773	1158	5
GLS2	6	0.93678	0.93683	1	15839	1	0.018009	0.060232	0.893773	1159	4
ADRA1D	6	0.089989	0.21294	1	3623	1	0.018017	0.060248	0.893773	1160	4
VEGFA	6	0.99441	0.9943	1	17100	0	0.018027	0.060276	0.893773	1161	5
CHP2	6	0.096759	0.22518	1	3802	3	0.01803	0.060286	0.893773	1162	1
ZNF831	6	0.99124	0.99112	1	17019	0	0.01805	0.060343	0.893773	1163	5
PLEKHG5	6	0.20146	0.37412	1	5998	2	0.018053	0.060356	0.893773	1164	4
RAB15	6	0.53084	0.67308	1	10959	2	0.018108	0.060525	0.89538	1165	4
SYNPO2	6	0.82065	0.85547	1	14240	1	0.018159	0.060659	0.89538	1166	4
CDC20B	6	0.60231	0.72285	1	11827	1	0.018207	0.060789	0.89538	1167	5
TMEM255B	6	0.99272	0.99258	1	17055	0	0.01821	0.060798	0.89538	1168	5
RAB2A	6	0.60291	0.72329	1	11834	2	0.018258	0.060939	0.89538	1169	3
IRF4	6	0.45721	0.62359	1	10078	1	0.018265	0.060961	0.89538	1170	4
CAMK2B	6	0.99519	0.99512	1	17115	0	0.018268	0.060967	0.89538	1171	5
ZIC4	6	0.39626	0.58103	1	9362	1	0.018276	0.060993	0.89538	1172	5
LY9	6	0.95695	0.95691	1	16259	0	0.018316	0.06112	0.89538	1173	4
OR51T1	3	0.47578	0.6363	1	10313	1	0.018333	0.061166	0.89538	1174	1
SAT1	3	0.060892	0.15835	0.971627	2803	1	0.018374	0.061277	0.89538	1175	2
C5AR1	5	0.97158	0.9715	1	16556	0	0.018397	0.061345	0.89538	1176	3
OR2AT4	4	0.80323	0.84644	1	14065	1	0.018407	0.061378	0.89538	1177	3
TREML2	4	0.24202	0.42058	1	6712	2	0.018437	0.06145	0.89538	1178	2
RBM38	6	0.047361	0.13087	0.947532	2380	3	0.018442	0.061465	0.89538	1179	2
B3GNT5	4	0.98155	0.98151	1	16785	0	0.018446	0.061476	0.89538	1180	4
RNF217	6	0.74571	0.81903	1	13584	1	0.018462	0.061525	0.89538	1181	4
BAI3	6	0.98797	0.98789	1	16944	0	0.018473	0.061554	0.89538	1182	5
SOX15	6	0.1245	0.27345	1	4520	2	0.018483	0.061588	0.89538	1183	2
PML	6	0.036903	0.10861	0.90867	2059	4	0.018504	0.061641	0.89538	1184	2
FCRL3	6	0.95873	0.9587	1	16293	0	0.018514	0.061664	0.89538	1185	4
CDADC1	4	0.98145	0.98141	1	16780	0	0.018547	0.06175	0.89538	1186	4
OR56B4	3	0.66367	0.76568	1	12594	1	0.018569	0.061827	0.89538	1187	2
CD93	6	0.48574	0.6431	1	10431	1	0.018578	0.061861	0.89538	1188	4
LITAF	6	0.90681	0.91085	1	15325	1	0.018588	0.061893	0.89538	1189	4
PABPC4L	5	0.073	0.18172	1	3125	2	0.018609	0.061959	0.89538	1190	3
GRM2	6	0.010548	0.037546	0.658949	982	3	0.018612	0.061966	0.89538	1191	3
PRAME	6	0.58195	0.70843	1	11589	1	0.018619	0.061989	0.89538	1192	4
SESTD1	6	0.14734	0.31056	1	5052	2	0.01863	0.062016	0.89538	1193	3
SUB1	1	0.98137	0.98133	1	16777	0	0.018632	0.062023	0.89538	1194	1
GJB7	2	0.98135	0.98131	1	16776	0	0.018654	0.062089	0.895439	1195	2
A1CF	6	0.97641	0.97639	1	16660	0	0.018682	0.062177	0.895439	1196	3
TIMM8B	3	0.98129	0.98124	1	16774	0	0.018711	0.062262	0.895439	1197	3
COX7A1	4	0.85723	0.87657	1	14668	0	0.018724	0.062303	0.895439	1198	3
CHRNA4	6	0.89511	0.90192	1	15146	1	0.018745	0.062375	0.895439	1199	3
ATP6V1G3	3	0.95894	0.95892	1	16295	0	0.018755	0.0624	0.895439	1200	3
UTY	6	0.11256	0.25287	1	4196	2	0.018756	0.062405	0.895439	1201	3
HTR1F	2	0.98121	0.98116	1	16769	0	0.018795	0.062521	0.895439	1202	2
ARHGEF10L	6	0.98916	0.98906	1	16970	0	0.018814	0.062571	0.895439	1203	4
TMEM194B	5	0.96834	0.96827	1	16500	0	0.018841	0.062651	0.895439	1204	4
BEX5	3	0.95938	0.95935	1	16309	0	0.018844	0.062659	0.895439	1205	3
PTGS1	6	0.56457	0.69633	1	11384	2	0.018936	0.06292	0.895439	1206	4
CLRN1	5	0.67374	0.77287	1	12709	1	0.01896	0.062989	0.895439	1207	4
RHBDD1	6	0.96425	0.96425	1	16413	0	0.018975	0.06303	0.895439	1208	5
HPCA	3	0.981	0.98097	1	16764	0	0.018998	0.063088	0.895439	1209	3
ADI1	6	0.87047	0.88497	1	14827	1	0.019	0.063094	0.895439	1210	2
KRTAP12-4	3	0.88174	0.89239	1	14965	0	0.019001	0.063097	0.895439	1211	2
MAP3K1	6	0.81208	0.85091	1	14160	1	0.01902	0.063152	0.895439	1212	5
NOP14	6	0.0026389	0.01142	0.399216	493	5	0.019065	0.063284	0.895439	1213	1
PQLC3	6	0.34484	0.52991	1	8513	3	0.019067	0.063288	0.895439	1214	3
ENPP3	6	0.98782	0.98775	1	16940	0	0.019073	0.063301	0.895439	1215	5
UROS	5	0.41077	0.59237	1	9555	2	0.019148	0.063504	0.895439	1216	3
IQCB1	5	0.25131	0.43117	1	6877	2	0.019179	0.0636	0.895439	1217	1
ELOVL7	6	0.80746	0.84851	1	14106	1	0.019194	0.063646	0.895439	1218	4
FGF9	6	0.38764	0.57247	1	9201	2	0.01922	0.063727	0.895439	1219	2
CEP78	6	0.88768	0.89648	1	15042	1	0.019254	0.063819	0.895439	1220	5
ZDHHC12	6	0.42876	0.60421	1	9759	2	0.019259	0.063833	0.895439	1221	3
ZNF575	6	0.17223	0.34013	1	5493	3	0.019321	0.064022	0.895439	1222	3
CHGB	6	0.52468	0.66893	1	10867	1	0.019324	0.06403	0.895439	1223	4
TMEM99	3	0.98065	0.98061	1	16753	0	0.019352	0.064113	0.895439	1224	3
DLX2	6	0.027312	0.086184	0.854747	1737	3	0.019368	0.064152	0.895439	1225	3
NRARP	4	0.067536	0.17144	0.992163	2972	1	0.019371	0.064167	0.895439	1226	1
STAMBP	6	0.83467	0.86324	1	14405	1	0.019422	0.064315	0.895439	1227	3
LPAR3	6	0.86795	0.88333	1	14788	1	0.019433	0.064346	0.895439	1228	4
OR51B4	3	0.84025	0.86646	1	14472	0	0.019433	0.064348	0.895439	1229	2
VPS41	6	0.28608	0.46929	1	7508	1	0.019453	0.06441	0.895439	1230	3
C16orf62	6	0.25327	0.4334	1	6915	2	0.019486	0.064518	0.895439	1231	2
PATE3	4	0.98051	0.98047	1	16750	0	0.019487	0.064521	0.895439	1232	4
PTBP2	6	0.30536	0.48953	1	7845	1	0.019565	0.064745	0.895439	1233	5
USP38	6	0.11553	0.25811	1	4270	2	0.019568	0.06475	0.895439	1234	4
EIF4A1	6	0.17298	0.341	1	5506	2	0.019582	0.06479	0.895439	1235	3
GNGT2	6	0.93598	0.93605	1	15820	1	0.019621	0.064915	0.895439	1236	5
PYCARD	6	0.92515	0.92613	1	15633	1	0.019629	0.064936	0.895439	1237	5
INSL3	6	0.64132	0.75002	1	12312	2	0.019647	0.064988	0.895439	1238	3
KRTAP5-9	3	0.9664	0.96638	1	16461	0	0.019653	0.065011	0.895439	1239	3
TCHHL1	5	0.9636	0.9636	1	16399	0	0.019691	0.065118	0.895439	1240	4
MARCH5	6	0.93971	0.93966	1	15908	0	0.019695	0.065129	0.895439	1241	5
DUPD1	6	0.97969	0.97968	1	16730	0	0.019714	0.065198	0.895439	1242	5
RPSA	4	0.98026	0.98022	1	16746	0	0.019742	0.065279	0.895439	1243	4
OIT3	6	0.52193	0.66708	1	10834	2	0.019776	0.065367	0.895439	1244	3
OR6B3	3	0.22299	0.39877	1	6404	1	0.019792	0.06541	0.895439	1245	2
ZNF704	6	0.0021245	0.0093246	0.37034	434	3	0.019841	0.065555	0.895439	1246	2
FUT4	6	0.9832	0.98313	1	16819	0	0.019852	0.065585	0.895439	1247	4
SATB2	6	0.67435	0.77328	1	12724	1	0.019857	0.065598	0.895439	1248	5
GPX8	4	0.98014	0.9801	1	16744	0	0.019861	0.065611	0.895439	1249	4
MYO9B	6	0.97542	0.97541	1	16639	0	0.019869	0.06564	0.895439	1250	4
TRABD2A	6	0.82406	0.85734	1	14280	1	0.019878	0.065672	0.895439	1251	4
LRRC46	6	0.9641	0.9641	1	16410	0	0.019883	0.065692	0.895439	1252	5
RFNG	5	0.16221	0.32838	1	5335	1	0.01989	0.065712	0.895439	1253	4
BSG	6	0.32259	0.50737	1	8144	3	0.019904	0.065757	0.895439	1254	2
C1orf173	6	0.057601	0.15177	0.97065	2692	1	0.019905	0.065759	0.895439	1255	2
FAM105A	6	0.18436	0.35424	1	5708	1	0.019922	0.065801	0.895439	1256	5
TMEM19	5	0.63801	0.74778	1	12267	1	0.019946	0.065875	0.895439	1257	4
ABCB1	6	0.84505	0.86926	1	14538	1	0.019957	0.065905	0.895439	1258	5
ARHGAP24	6	0.90052	0.90598	1	15221	1	0.019958	0.06591	0.895439	1259	4
C1orf222	3	0.98003	0.98	1	16741	0	0.019967	0.065939	0.895439	1260	3
CMTM3	6	0.018224	0.060668	0.7783	1341	1	0.01997	0.065948	0.895439	1261	2
ZFP69B	6	0.31067	0.49515	1	7934	2	0.020001	0.066028	0.895439	1262	2
C6orf211	4	0.79166	0.84067	1	13968	1	0.020019	0.066076	0.895439	1263	2
GNAI1	5	0.18645	0.35664	1	5740	2	0.020031	0.06611	0.895439	1264	3
SLC19A2	6	0.94924	0.9492	1	16073	0	0.020034	0.066118	0.895439	1265	3
KCNA2	6	0.20948	0.38341	1	6158	1	0.02004	0.066134	0.895439	1266	4
ANKRD30B	3	0.97992	0.9799	1	16737	0	0.020076	0.066237	0.895439	1267	3
KLF10	6	0.37795	0.56274	1	9035	3	0.020099	0.066299	0.895439	1268	2
GPRC5B	6	0.48361	0.64165	1	10412	1	0.020112	0.066339	0.895439	1269	5
CCDC124	6	0.69475	0.78807	1	13007	1	0.02012	0.066365	0.895439	1270	3
FOXO4	6	0.7697	0.82996	1	13760	1	0.020127	0.066381	0.895439	1271	4
RXFP1	3	0.97986	0.97983	1	16735	0	0.020139	0.066427	0.895439	1272	3
PAK3	6	0.59103	0.71482	1	11702	1	0.020142	0.066433	0.895439	1273	4
FMNL1	6	0.18097	0.35032	1	5641	1	0.020161	0.066482	0.895439	1274	5
MYBPH	6	0.46852	0.6313	1	10226	2	0.020164	0.066488	0.895439	1275	4
CD96	6	0.74918	0.82059	1	13608	1	0.020176	0.066519	0.895439	1276	5
MXRA7	6	0.6	0.7212	1	11797	2	0.020183	0.066541	0.895439	1277	4
LONRF3	6	0.70474	0.79536	1	13150	1	0.020185	0.066548	0.895439	1278	2
USP50	4	0.97971	0.9797	1	16731	0	0.02029	0.066864	0.895439	1279	4
STAC	6	0.75853	0.82471	1	13680	1	0.02029	0.066867	0.895439	1280	5
C6orf222	6	0.38578	0.57061	1	9169	1	0.020293	0.066873	0.895439	1281	4
EBF4	6	0.56325	0.6954	1	11371	1	0.020351	0.067027	0.895439	1282	4
KLHDC10	6	0.90809	0.91182	1	15346	1	0.020357	0.067047	0.895439	1283	2
C14orf1	5	0.14405	0.30621	1	4996	2	0.020385	0.06713	0.895439	1284	3
CACNA1F	6	0.72678	0.81095	1	13434	1	0.020422	0.067242	0.895439	1285	3
GRID1	6	0.96409	0.96409	1	16409	0	0.020444	0.067308	0.895439	1286	5
ITGBL1	6	0.99204	0.99192	1	17038	0	0.020455	0.067338	0.895439	1287	5
ZNF474	3	0.9323	0.93262	1	15759	0	0.020473	0.06739	0.895439	1288	2
GDAP1	6	0.96993	0.96985	1	16526	0	0.020477	0.067404	0.895439	1289	5
SIPA1	6	0.95595	0.95595	1	16237	0	0.020487	0.067432	0.895439	1290	3
SELPLG	5	0.53413	0.67533	1	11010	1	0.020499	0.067463	0.895439	1291	3
TTC33	5	0.811	0.85035	1	14148	1	0.02051	0.067498	0.895439	1292	4
GPRC5A	5	0.20603	0.37947	1	6094	2	0.020521	0.06752	0.895439	1293	3
BPIFB2	6	0.57706	0.70507	1	11530	2	0.02054	0.067571	0.895439	1294	4
PPARD	6	0.073312	0.18231	1	3135	2	0.020599	0.067735	0.895439	1295	4
SPG7	6	0.49082	0.64638	1	10483	1	0.020634	0.067842	0.895439	1296	4
ARRB2	6	0.96222	0.96216	1	16374	0	0.020642	0.067865	0.895439	1297	4
SRP68	6	0.68543	0.78122	1	12878	2	0.020646	0.067874	0.895439	1298	4
KIAA0232	6	0.60179	0.7225	1	11819	1	0.020654	0.067888	0.895439	1299	4
C1orf105	6	0.043506	0.12279	0.934025	2266	1	0.020661	0.067907	0.895439	1300	5
EID2	4	0.63683	0.74699	1	12258	1	0.020666	0.067922	0.895439	1301	3
C3orf72	6	0.97419	0.97415	1	16612	0	0.020685	0.067985	0.895439	1302	5
ZBTB49	6	0.16981	0.33726	1	5455	1	0.020713	0.068062	0.895439	1303	4
FMR1	6	0.87562	0.88832	1	14885	1	0.020713	0.068062	0.895439	1304	3
CEP112	6	0.43351	0.60747	1	9811	2	0.020742	0.068145	0.895439	1305	3
TNFSF12	6	0.15179	0.31609	1	5142	1	0.020749	0.068161	0.895439	1306	5
SLC22A6	6	0.46332	0.62775	1	10163	2	0.020761	0.068199	0.895439	1307	3
ZFAND3	6	0.49905	0.65187	1	10563	1	0.020769	0.068223	0.895439	1308	4
KIF27	4	0.97914	0.97912	1	16719	0	0.020863	0.068507	0.895439	1309	4
TNFAIP6	4	0.76099	0.82584	1	13697	1	0.020881	0.068563	0.895439	1310	2
KNTC1	6	0.19429	0.36586	1	5872	1	0.020938	0.068731	0.895439	1311	4
TMEM106A	6	0.98229	0.98224	1	16798	0	0.020947	0.068753	0.895439	1312	5
CXCL10	2	0.4893	0.64535	1	10467	1	0.020947	0.068753	0.895439	1313	1
KISS1	2	0.97905	0.97903	1	16716	0	0.020949	0.068756	0.895439	1314	2
CCDC36	6	0.70419	0.79498	1	13140	1	0.020956	0.068776	0.895439	1315	3
LANCL1	6	0.97353	0.97347	1	16593	0	0.02097	0.068814	0.895439	1316	5
NUDT18	6	0.69419	0.78767	1	12997	2	0.020973	0.06882	0.895439	1317	4
VAV1	6	0.57817	0.70581	1	11545	1	0.020983	0.068844	0.895439	1318	5
COL4A6	6	0.22544	0.40156	1	6443	2	0.021003	0.06889	0.895439	1319	3
C2orf50	5	0.38369	0.56847	1	9131	1	0.021025	0.068953	0.895439	1320	4
PGLYRP2	6	0.94561	0.9456	1	15998	0	0.021053	0.069039	0.895439	1321	4
PPP1R14D	5	0.95235	0.9523	1	16150	0	0.021053	0.06904	0.895439	1322	3
SLC27A2	6	0.24257	0.42121	1	6723	2	0.021068	0.069079	0.895439	1323	2
TMEM44	6	0.13966	0.299	1	4903	2	0.021083	0.069126	0.895439	1324	3
SKA2	5	0.51332	0.66132	1	10729	2	0.021091	0.069158	0.895439	1325	2
TCF23	4	0.97889	0.97886	1	16712	0	0.021114	0.069214	0.895439	1326	4
OR5M8	2	0.331	0.51596	1	8296	1	0.02112	0.06923	0.895439	1327	1
COL27A1	6	0.46334	0.62776	1	10164	2	0.021132	0.069266	0.895439	1328	2
RHOB	4	0.70079	0.79246	1	13084	1	0.02114	0.069294	0.895439	1329	2
ABCA10	5	0.7192	0.80627	1	13339	1	0.021152	0.069329	0.895439	1330	4
TCHP	6	0.9361	0.93615	1	15826	1	0.02116	0.069354	0.895439	1331	2
GALR3	5	0.30505	0.4892	1	7839	2	0.021198	0.069443	0.895439	1332	3
MYCL1	5	0.41719	0.59654	1	9638	1	0.021199	0.069445	0.895439	1333	3
TGFBR3	6	0.091415	0.21551	1	3669	1	0.021233	0.069548	0.895439	1334	4
OR10W1	4	0.97877	0.97873	1	16709	0	0.021233	0.069551	0.895439	1335	4
RNASE3	4	0.84812	0.87109	1	14571	0	0.021239	0.069572	0.895439	1336	3
DCX	6	0.9895	0.98939	1	16979	0	0.021268	0.06965	0.895439	1337	4
APOH	6	0.67813	0.77599	1	12772	1	0.021282	0.069684	0.895439	1338	4
MYO18B	6	0.15869	0.32425	1	5271	2	0.021286	0.069693	0.895439	1339	3
ZNF721	1	0.9787	0.97866	1	16706	0	0.021304	0.069749	0.895439	1340	1
AXDND1	6	0.38242	0.5672	1	9107	2	0.021371	0.069914	0.895439	1341	4
TLR4	6	0.58608	0.71132	1	11645	1	0.021372	0.069914	0.895439	1342	4
ANKRD29	6	0.92435	0.92542	1	15623	1	0.021398	0.069978	0.895439	1343	4
BCAM	6	0.8604	0.87858	1	14705	1	0.021418	0.070048	0.895439	1344	4
FAM71E2	6	0.94787	0.94781	1	16048	0	0.021423	0.070063	0.895439	1345	4
HEXB	6	0.057829	0.15222	0.97065	2700	3	0.021429	0.070076	0.895439	1346	3
ZC3H12C	6	0.35703	0.54204	1	8709	1	0.021438	0.0701	0.895439	1347	4
MARK4	6	0.56499	0.69665	1	11390	1	0.021446	0.070123	0.895439	1348	5
ANKRD55	6	0.10689	0.24306	1	4066	1	0.021449	0.070127	0.895439	1349	5
GPR82	2	0.49236	0.64738	1	10497	1	0.021467	0.070173	0.895439	1350	1
DLG3	6	0.19878	0.37098	1	5957	1	0.021471	0.070183	0.895439	1351	5
IGSF9B	6	0.11878	0.26375	1	4352	3	0.021532	0.070387	0.895884	1352	3
OR1C1	4	0.93049	0.93094	1	15729	0	0.021562	0.070474	0.895884	1353	3
PPM1E	6	0.5063	0.65662	1	10645	1	0.02161	0.070585	0.895884	1354	4
CYP27A1	6	0.58661	0.7117	1	11649	1	0.021626	0.070643	0.895884	1355	4
CTSS	6	0.63135	0.74321	1	12188	2	0.021639	0.070686	0.895884	1356	4
CALR	6	0.20488	0.37813	1	6070	2	0.021672	0.070797	0.895884	1357	2
PAIP1	5	0.57011	0.70024	1	11460	1	0.021686	0.070836	0.895884	1358	3
MYO3B	6	0.19374	0.3652	1	5864	2	0.021713	0.070912	0.895884	1359	3
C1orf43	6	0.28657	0.46982	1	7514	1	0.02172	0.070934	0.895884	1360	4
HSDL2	5	0.092037	0.21663	1	3683	1	0.021737	0.070975	0.895884	1361	3
WDR47	6	0.75363	0.82255	1	13645	1	0.02175	0.071017	0.895884	1362	4
FAM160A2	6	0.98238	0.98233	1	16802	0	0.021758	0.071048	0.895884	1363	5
DACH2	6	0.70731	0.79724	1	13183	1	0.021762	0.071063	0.895884	1364	4
NUDT16	6	0.23532	0.41296	1	6602	3	0.021777	0.071102	0.895884	1365	3
OR6B1	6	0.58519	0.71071	1	11634	2	0.021807	0.071184	0.895884	1366	4
ARHGEF4	6	0.34927	0.53432	1	8574	2	0.021816	0.071208	0.895884	1367	4
USP28	6	0.72976	0.81213	1	13454	1	0.021827	0.071235	0.895884	1368	4
POU3F3	5	0.81151	0.85062	1	14154	1	0.021833	0.071249	0.895884	1369	3
LYAR	6	0.69411	0.78762	1	12995	2	0.021848	0.071294	0.895884	1370	4
IGDCC4	6	0.97295	0.97289	1	16576	0	0.021856	0.071319	0.895884	1371	4
KRTAP16-1	6	0.21661	0.39155	1	6286	3	0.021906	0.07147	0.895884	1372	2
CRLF1	6	0.23437	0.4119	1	6581	1	0.021922	0.071513	0.895884	1373	5
ODAM	3	0.37225	0.55708	1	8933	1	0.021963	0.071632	0.895884	1374	1
EPS8	6	0.20363	0.37666	1	6039	2	0.021971	0.071648	0.895884	1375	3
ESX1	6	0.74876	0.82042	1	13606	1	0.021987	0.071688	0.895884	1376	3
TMEM156	1	0.97797	0.97791	1	16695	0	0.022027	0.071801	0.895884	1377	1
USP40	6	0.8739	0.88724	1	14864	1	0.022069	0.071925	0.895884	1378	5
SHC4	6	0.98874	0.98862	1	16964	0	0.022078	0.071952	0.895884	1379	5
FZD5	6	0.55755	0.69147	1	11306	1	0.0221	0.072011	0.895884	1380	2
TDRD9	6	0.97601	0.97598	1	16650	0	0.022133	0.072106	0.895884	1381	4
N4BP3	6	0.64967	0.75587	1	12425	1	0.022207	0.072313	0.895884	1382	5
SNRNP200	6	0.043201	0.12214	0.932924	2256	3	0.022229	0.0724	0.895884	1383	1
STXBP2	6	0.20554	0.37892	1	6082	2	0.022236	0.072425	0.895884	1384	3
CRYGN	6	0.86813	0.88345	1	14792	1	0.022292	0.072584	0.895884	1385	4
MXRA5	6	0.95871	0.95868	1	16292	0	0.022301	0.072612	0.895884	1386	5
MTERF	1	0.97768	0.97762	1	16690	0	0.022323	0.072675	0.895884	1387	1
TRIM31	6	0.42631	0.60259	1	9738	1	0.022323	0.072681	0.895884	1388	5
CRLF3	6	0.91229	0.91525	1	15400	1	0.022325	0.072686	0.895884	1389	4
LRRC71	6	0.98402	0.98395	1	16839	0	0.022358	0.072774	0.895884	1390	3
STIM2	6	0.518	0.66448	1	10792	2	0.022394	0.072862	0.895884	1391	3
STAT1	6	0.87954	0.89088	1	14940	1	0.02241	0.072905	0.895884	1392	5
CSNK1G2	6	0.16998	0.33745	1	5460	1	0.022456	0.07303	0.895884	1393	3
IL1RAPL1	6	0.97518	0.97514	1	16636	0	0.022463	0.073046	0.895884	1394	5
HPS5	6	0.14681	0.30992	1	5045	2	0.022468	0.073059	0.895884	1395	4
PPIL6	3	0.96959	0.96951	1	16523	0	0.022481	0.073107	0.895884	1396	3
FRMD6	6	0.98501	0.9849	1	16861	0	0.022487	0.073125	0.895884	1397	5
ABI3	6	0.98789	0.98782	1	16943	0	0.022523	0.073229	0.895884	1398	5
PTPN3	6	0.4221	0.59979	1	9689	2	0.02253	0.073246	0.895884	1399	3
KRT71	6	0.90356	0.90827	1	15268	1	0.022531	0.07325	0.895884	1400	4
VAV3	6	0.38232	0.56711	1	9105	3	0.022551	0.073299	0.895884	1401	3
HSPBAP1	6	0.72439	0.80996	1	13411	1	0.022566	0.07335	0.895884	1402	5
PHF8	6	0.50769	0.65752	1	10660	2	0.022568	0.073355	0.895884	1403	4
DBH	6	0.84816	0.87111	1	14573	1	0.022576	0.073372	0.895884	1404	5
FZD1	6	0.64811	0.75476	1	12410	2	0.022616	0.073484	0.895884	1405	2
LRP11	6	0.24035	0.41868	1	6688	1	0.022663	0.073614	0.895884	1406	5
FOXR1	6	0.91088	0.91413	1	15375	1	0.022666	0.073627	0.895884	1407	4
KNG1	6	0.32671	0.51164	1	8218	2	0.02268	0.073658	0.895884	1408	2
ECH1	6	0.34122	0.52627	1	8456	2	0.022712	0.073751	0.895884	1409	2
CGNL1	6	0.97234	0.97226	1	16567	0	0.022743	0.07383	0.895884	1410	5
RNF186	5	0.24998	0.42963	1	6850	3	0.022759	0.073875	0.895884	1411	1
SLC24A4	6	0.98685	0.98678	1	16914	0	0.022772	0.073913	0.895884	1412	5
DGKD	6	0.40798	0.5905	1	9519	1	0.022777	0.073925	0.895884	1413	5
CNBP	6	0.49207	0.64718	1	10494	2	0.022803	0.073987	0.895884	1414	4
TXNRD3NB	4	0.14046	0.30033	1	4921	1	0.02281	0.074014	0.895884	1415	3
CLDN25	5	0.95087	0.95079	1	16118	0	0.022812	0.074022	0.895884	1416	4
UBR3	6	0.36088	0.54586	1	8763	1	0.022831	0.074079	0.895884	1417	5
KLHL4	6	0.90121	0.90648	1	15232	1	0.022868	0.074192	0.895884	1418	4
ETV4	6	0.40142	0.58618	1	9439	2	0.022874	0.074207	0.895884	1419	2
C12orf76	5	0.87603	0.88859	1	14892	1	0.022949	0.074414	0.895884	1420	4
CDKAL1	6	0.45164	0.61985	1	10021	1	0.022964	0.074462	0.895884	1421	3
DNAJB8	6	0.91672	0.9189	1	15477	1	0.022968	0.074471	0.895884	1422	5
PWWP2A	6	0.015124	0.051562	0.738464	1202	4	0.02297	0.074476	0.895884	1423	2
ID1	4	0.092714	0.21784	1	3705	1	0.022992	0.074539	0.895884	1424	3
TMOD4	6	0.95943	0.95941	1	16311	0	0.02303	0.074653	0.895884	1425	5
KLHL8	6	0.54811	0.68495	1	11197	1	0.023057	0.074719	0.895884	1426	5
B4GALT2	6	0.30491	0.48906	1	7837	3	0.023067	0.074748	0.895884	1427	3
PHKG1	4	0.12663	0.27713	1	4570	2	0.023078	0.07478	0.895884	1428	2
FAM49A	6	0.44253	0.61366	1	9913	1	0.023079	0.074784	0.895884	1429	4
IL8	1	0.9769	0.97686	1	16672	0	0.0231	0.074847	0.895884	1430	1
ATP2C2	6	0.97708	0.97703	1	16675	0	0.0231	0.074847	0.895884	1431	4
LRP6	6	0.9955	0.99543	1	17122	0	0.023106	0.074862	0.895884	1432	5
SERINC1	6	0.98946	0.98936	1	16978	0	0.023112	0.074877	0.895884	1433	5
FAM180B	5	0.93367	0.93388	1	15778	0	0.023122	0.074902	0.895884	1434	4
EXOSC2	6	0.0088678	0.032324	0.624634	892	3	0.023131	0.074922	0.895884	1435	2
RLBP1	6	0.97034	0.97023	1	16536	0	0.023142	0.074955	0.895884	1436	4
FHOD1	6	0.66386	0.76583	1	12597	1	0.023152	0.074977	0.895884	1437	4
CYP4V2	6	0.9729	0.97284	1	16575	0	0.023165	0.075008	0.895884	1438	5
RCVRN	5	0.37292	0.55777	1	8944	2	0.023175	0.075035	0.895884	1439	3
TMEM200C	5	0.79081	0.84024	1	13963	1	0.023226	0.075171	0.895884	1440	4
KRT9	6	0.92104	0.92261	1	15561	1	0.023252	0.075254	0.895884	1441	2
ZNF395	6	0.48528	0.64278	1	10424	2	0.02326	0.075283	0.895884	1442	2
LMO3	6	0.25475	0.43509	1	6945	2	0.023292	0.075365	0.895884	1443	4
GRID2	6	0.67398	0.77304	1	12716	1	0.023294	0.075371	0.895884	1444	5
ADRA1B	6	0.35532	0.54034	1	8680	1	0.023298	0.075383	0.895884	1445	2
ZMYM6	6	0.9883	0.98818	1	16953	0	0.0233	0.075391	0.895884	1446	5
BEGAIN	6	0.99546	0.9954	1	17120	0	0.02331	0.075412	0.895884	1447	5
PPP2R5D	6	0.8711	0.8854	1	14832	1	0.023312	0.075416	0.895884	1448	4
TRAF3IP1	6	0.096326	0.22438	1	3795	2	0.023389	0.07563	0.895884	1449	2
PDE6B	6	0.98944	0.98934	1	16977	0	0.023391	0.075634	0.895884	1450	4
VANGL2	6	0.29534	0.47904	1	7662	2	0.023401	0.075657	0.895884	1451	4
CHN2	6	0.13649	0.29376	1	4820	1	0.023426	0.075725	0.895884	1452	4
ZNF324B	6	0.11786	0.26218	1	4328	3	0.023453	0.07579	0.895884	1453	3
TTC39C	6	0.98126	0.98122	1	16770	0	0.023466	0.07583	0.895884	1454	5
EPB41L4B	6	0.36701	0.55188	1	8839	2	0.023485	0.075879	0.895884	1455	4
VSTM1	5	0.96309	0.96309	1	16393	0	0.02349	0.075897	0.895884	1456	4
LAMA2	6	0.79915	0.84437	1	14035	1	0.023505	0.075927	0.895884	1457	5
FUK	6	0.96251	0.96247	1	16381	0	0.023506	0.075934	0.895884	1458	4
BEX1	3	0.54807	0.68492	1	11196	1	0.023516	0.075956	0.895884	1459	2
NCKAP5	6	0.56271	0.69502	1	11361	2	0.023518	0.075964	0.895884	1460	2
CASP4	2	0.97647	0.97646	1	16661	0	0.023527	0.075986	0.895884	1461	2
OR56A4	5	0.9655	0.96548	1	16441	0	0.023545	0.07602	0.895884	1462	3
C17orf62	6	0.27278	0.45514	1	7284	2	0.023552	0.076039	0.895884	1463	4
B3GAT1	6	0.93566	0.93575	1	15813	1	0.023647	0.076322	0.898606	1464	4
RAB3C	2	0.97632	0.97631	1	16658	0	0.023676	0.076397	0.898871	1465	2
TMEM37	6	0.79805	0.84384	1	14023	1	0.023704	0.076473	0.899156	1466	2
EML4	6	0.65659	0.76067	1	12502	2	0.023762	0.076627	0.899273	1467	3
SLC39A12	6	0.71027	0.79951	1	13218	1	0.02384	0.076852	0.899273	1468	3
ZNF530	4	0.7164	0.80408	1	13307	1	0.023853	0.076895	0.899273	1469	2
SPATA3	3	0.7444	0.81846	1	13570	1	0.023879	0.076969	0.899273	1470	2
NOP16	6	0.00032532	0.001538	0.145985	180	5	0.023904	0.077037	0.899273	1471	1
FAM8A1	2	0.078394	0.19166	1	3283	1	0.023914	0.077065	0.899273	1472	1
LRP5	6	0.24407	0.42294	1	6748	3	0.023914	0.077065	0.899273	1473	2
P2RX4	6	0.99226	0.99214	1	17041	0	0.023917	0.077073	0.899273	1474	4
TMSB10	2	0.72498	0.81022	1	13418	0	0.023935	0.07712	0.899273	1475	1
AGPS	6	0.96208	0.96203	1	16371	0	0.023943	0.077144	0.899273	1476	5
GPM6B	6	0.73478	0.81431	1	13493	1	0.023973	0.077231	0.899273	1477	5
PRSS46	5	0.26435	0.44585	1	7110	1	0.023994	0.07729	0.899273	1478	2
CALHM1	6	0.33048	0.51545	1	8284	2	0.024	0.077304	0.899273	1479	4
DYM	6	0.97223	0.97215	1	16566	0	0.024006	0.077323	0.899273	1480	4
INF2	6	0.51929	0.6653	1	10808	2	0.024031	0.077395	0.899273	1481	4
C12orf43	6	0.36517	0.55	1	8819	3	0.024033	0.0774	0.899273	1482	2
C7orf60	6	0.41824	0.59722	1	9649	1	0.024042	0.077425	0.899273	1483	5
MTUS1	6	0.3134	0.49804	1	7991	2	0.024052	0.077449	0.899273	1484	4
ANO4	6	0.31579	0.50054	1	8032	3	0.024061	0.077474	0.899273	1485	3
FRMPD2	6	0.71957	0.80654	1	13343	2	0.024097	0.077571	0.899482	1486	2
EGFLAM	6	0.71584	0.80366	1	13295	1	0.024173	0.077796	0.899482	1487	4
DCLK1	6	0.64638	0.75354	1	12391	1	0.02418	0.077816	0.899482	1488	5
CEP41	6	0.047452	0.13105	0.947532	2384	3	0.024265	0.078035	0.899482	1489	3
ZMPSTE24	5	0.9643	0.9643	1	16414	0	0.024266	0.078039	0.899482	1490	4
GUCA1C	2	0.97573	0.9757	1	16647	0	0.02427	0.078046	0.899482	1491	2
TCF15	6	0.61213	0.72996	1	11973	1	0.024275	0.078059	0.899482	1492	5
SLC38A1	6	0.68689	0.78229	1	12898	2	0.024291	0.078101	0.899482	1493	4
CASP1	2	0.9757	0.97568	1	16645	0	0.024297	0.078117	0.899482	1494	2
MORN4	6	0.74512	0.81877	1	13579	1	0.024316	0.078167	0.899482	1495	5
MAGI1	6	0.94095	0.94094	1	15928	0	0.024324	0.078189	0.899482	1496	4
IDUA	6	0.94325	0.94323	1	15956	0	0.02433	0.078212	0.899482	1497	5
PLCXD3	6	0.32834	0.51328	1	8252	3	0.024339	0.078235	0.899482	1498	3
NLGN1	6	0.86531	0.88167	1	14753	1	0.024352	0.078264	0.899482	1499	5
ACOT8	6	0.5063	0.65662	1	10643	1	0.024355	0.078275	0.899482	1500	3
FOLR2	3	0.62903	0.74161	1	12164	1	0.024392	0.07837	0.899682	1501	2
C1orf53	6	0.61226	0.73005	1	11975	1	0.024418	0.078441	0.899682	1502	4
ZSCAN31	4	0.51896	0.66511	1	10806	1	0.02442	0.078449	0.899682	1503	2
ENTPD6	6	0.97135	0.97128	1	16551	0	0.024466	0.078584	0.900094	1504	4
MYBPC2	6	0.6546	0.7593	1	12482	2	0.024484	0.078638	0.900094	1505	2
PLA2G2F	6	0.99289	0.99276	1	17058	0	0.024495	0.078664	0.900094	1506	5
CRTC3	6	0.90537	0.90969	1	15293	1	0.024513	0.078711	0.900094	1507	4
TMED2	5	0.27979	0.46267	1	7398	2	0.024531	0.078746	0.900094	1508	1
SYT9	6	0.61135	0.72938	1	11961	1	0.024619	0.078992	0.902193	1509	4
LETM2	6	0.97145	0.97137	1	16553	0	0.024634	0.079034	0.902193	1510	5
PLEKHA2	6	0.79108	0.84037	1	13964	1	0.024657	0.079101	0.902363	1511	4
TM9SF4	6	0.20203	0.37478	1	6009	3	0.024677	0.079158	0.90241	1512	3
PDE8B	6	0.43236	0.6067	1	9801	1	0.024701	0.079229	0.90241	1513	5
BICD1	6	0.096136	0.22404	1	3790	2	0.024731	0.079309	0.90241	1514	4
GPBP1	6	0.54053	0.67974	1	11095	2	0.024741	0.079334	0.90241	1515	3
ERC1	6	0.92336	0.92458	1	15604	1	0.024764	0.079408	0.90241	1516	5
PITPNM2	6	0.94929	0.94925	1	16075	0	0.024769	0.07942	0.90241	1517	5
DAW1	5	0.24835	0.42784	1	6818	2	0.02482	0.079575	0.903143	1518	3
ARHGAP5	4	0.93235	0.93266	1	15760	0	0.024835	0.079614	0.903143	1519	3
EMR1	6	0.1527	0.31716	1	5159	2	0.024844	0.079641	0.903143	1520	3
AZGP1	4	0.87342	0.88692	1	14854	0	0.024872	0.079721	0.903447	1521	3
LTF	6	0.6906	0.785	1	12949	2	0.024956	0.079945	0.903638	1522	3
SFI1	6	0.19315	0.36451	1	5857	2	0.024984	0.080018	0.903638	1523	3
PSMB2	6	0.0069348	0.026134	0.575855	781	4	0.024998	0.080056	0.903638	1524	1
SEPN1	6	0.93928	0.93925	1	15897	1	0.025004	0.080073	0.903638	1525	5
USP48	6	0.83868	0.86555	1	14452	1	0.025019	0.08012	0.903638	1526	4
SLC22A25	3	0.97492	0.9749	1	16624	0	0.025083	0.0803	0.903638	1527	3
CCR7	5	0.50125	0.65327	1	10584	1	0.025121	0.080398	0.903638	1528	2
SP100	6	0.072664	0.18109	1	3118	2	0.025127	0.080409	0.903638	1529	2
GDE1	6	0.89861	0.90453	1	15192	1	0.025158	0.080498	0.903638	1530	3
CLU	6	0.92844	0.92907	1	15694	1	0.02519	0.080587	0.903638	1531	4
GCG	6	0.54893	0.68549	1	11209	1	0.025191	0.080588	0.903638	1532	4
IPPK	6	0.67833	0.77615	1	12775	1	0.025208	0.08064	0.903638	1533	4
SOX4	4	0.27624	0.45889	1	7341	2	0.025213	0.080653	0.903638	1534	2
TBC1D22A	6	0.87622	0.88872	1	14897	1	0.025215	0.080656	0.903638	1535	5
GPN1	6	0.25289	0.43299	1	6908	2	0.025226	0.080683	0.903638	1536	3
DTX3	6	0.87366	0.88707	1	14858	1	0.025281	0.080837	0.903638	1537	4
FST	6	0.83463	0.86322	1	14404	1	0.025288	0.080853	0.903638	1538	5
MTSS1L	6	0.33159	0.51656	1	8306	2	0.025309	0.080917	0.903638	1539	3
CCDC160	2	0.8454	0.86947	1	14540	0	0.025319	0.080948	0.903638	1540	1
TNNT2	6	0.33464	0.51967	1	8358	2	0.02532	0.080949	0.903638	1541	1
ZMYM5	6	0.61108	0.72919	1	11956	1	0.025344	0.081022	0.903638	1542	5
PLCG2	6	0.98492	0.98481	1	16860	0	0.02535	0.081036	0.903638	1543	4
LIPF	5	0.73661	0.81507	1	13511	1	0.025351	0.081038	0.903638	1544	3
IL34	6	0.083043	0.20017	1	3428	1	0.025362	0.081069	0.903638	1545	5
SNAP25	6	0.20003	0.37246	1	5977	1	0.025392	0.081155	0.903638	1546	4
YWHAH	5	0.03157	0.096952	0.877246	1905	3	0.025412	0.081202	0.903638	1547	2
KCNH3	6	0.085546	0.20483	1	3498	2	0.025449	0.081309	0.903638	1548	2
DOM3Z	6	0.20395	0.37705	1	6048	2	0.025465	0.081346	0.903638	1549	3
TBC1D20	6	0.93478	0.93493	1	15793	1	0.025477	0.081379	0.903638	1550	3
LRRC18	6	0.97984	0.97981	1	16734	0	0.025513	0.081475	0.903638	1551	3
JMJD1C	6	0.42788	0.60363	1	9751	1	0.025532	0.08152	0.903638	1552	3
CD27	6	0.98146	0.98142	1	16781	0	0.02557	0.081628	0.903638	1553	4
TNC	6	0.65967	0.76277	1	12537	2	0.025586	0.08167	0.903638	1554	3
SH3YL1	6	0.968	0.96795	1	16491	0	0.025606	0.081713	0.903638	1555	5
HSPH1	6	0.99501	0.99495	1	17111	0	0.025606	0.081713	0.903638	1556	5
PRR19	5	0.89868	0.90458	1	15194	1	0.02563	0.081783	0.903638	1557	3
FAM19A2	4	0.13423	0.28997	1	4758	1	0.025633	0.081791	0.903638	1558	3
GSTT1	6	0.10003	0.23102	1	3884	4	0.025642	0.081813	0.903638	1559	2
TLL2	6	0.63469	0.74551	1	12227	2	0.025644	0.081818	0.903638	1560	4
ZNF792	6	0.97066	0.97059	1	16543	0	0.025689	0.081934	0.903638	1561	5
GLTPD1	6	0.21398	0.38852	1	6241	3	0.025706	0.081982	0.903638	1562	3
KIFC1	6	0.22297	0.39875	1	6403	2	0.025711	0.081997	0.903638	1563	4
CPA3	5	0.68362	0.77991	1	12845	1	0.025711	0.081999	0.903638	1564	2
MAPK8	6	0.65126	0.75696	1	12448	1	0.025741	0.08208	0.903638	1565	5
KIF13B	6	0.52688	0.67045	1	10896	1	0.02577	0.082164	0.903638	1566	4
PPP1R14C	4	0.41514	0.59521	1	9612	2	0.02583	0.082324	0.903638	1567	2
PBDC1	3	0.93142	0.93182	1	15742	0	0.025832	0.08233	0.903638	1568	2
ZNF331	2	0.80626	0.84792	1	14095	0	0.025838	0.082345	0.903638	1569	1
DNAJC5B	3	0.97412	0.97407	1	16608	0	0.025879	0.082455	0.903638	1570	3
C15orf38	6	0.98991	0.98981	1	16986	0	0.025891	0.082487	0.903638	1571	5
NEK10	6	0.67169	0.77138	1	12686	2	0.025899	0.082509	0.903638	1572	2
FAM149A	6	0.92307	0.92433	1	15597	1	0.025935	0.082617	0.903638	1573	3
CALY	6	0.35423	0.53926	1	8667	2	0.025953	0.082669	0.903638	1574	4
ANKMY2	6	0.97889	0.97886	1	16713	0	0.02596	0.082688	0.903638	1575	4
MARVELD2	6	0.55389	0.68891	1	11270	1	0.025963	0.082694	0.903638	1576	4
KRT20	6	0.64112	0.7499	1	12306	2	0.025972	0.082714	0.903638	1577	4
AP1S1	6	0.92959	0.93009	1	15713	1	0.025988	0.082764	0.903638	1578	5
RWDD2A	4	0.96842	0.96835	1	16503	0	0.026002	0.082794	0.903638	1579	3
PNMAL1	6	0.57868	0.70615	1	11552	1	0.026017	0.08283	0.903638	1580	5
KRT16	2	0.97396	0.9739	1	16606	0	0.026041	0.082898	0.903805	1581	2
RNF112	6	0.35684	0.54184	1	8706	2	0.026081	0.083011	0.904121	1582	3
FASLG	4	0.78485	0.83717	1	13915	1	0.026088	0.083032	0.904121	1583	3
INSL5	4	0.82574	0.85828	1	14296	1	0.026131	0.083169	0.904585	1584	3
ISLR2	6	0.95001	0.94995	1	16096	0	0.026134	0.08318	0.904585	1585	4
ARHGAP17	6	0.60338	0.72363	1	11843	1	0.026178	0.083294	0.904738	1586	3
KRT26	6	0.51153	0.66009	1	10710	2	0.026199	0.083357	0.904738	1587	3
RGAG4	5	0.60563	0.72526	1	11870	2	0.026211	0.083388	0.904738	1588	3
PEX5L	6	0.088317	0.20995	1	3588	2	0.026214	0.083404	0.904738	1589	2
TNKS1BP1	6	0.57037	0.70042	1	11466	1	0.026261	0.083524	0.905007	1590	5
KTN1	6	0.12088	0.26732	1	4411	1	0.026265	0.083533	0.905007	1591	4
SYN2	6	0.71535	0.8033	1	13286	2	0.026349	0.083768	0.906982	1592	1
HECA	6	0.37832	0.56311	1	9042	2	0.026373	0.083838	0.907165	1593	3
GPR27	5	0.34072	0.52578	1	8449	2	0.02642	0.083985	0.908186	1594	2
KIAA1024L	2	0.97355	0.97349	1	16595	0	0.026454	0.084071	0.908534	1595	2
PBX1	6	0.39976	0.58455	1	9414	1	0.026477	0.084139	0.908534	1596	3
C6orf25	6	0.26015	0.44122	1	7036	3	0.026495	0.084193	0.908534	1597	3
RPS6KA2	6	0.82555	0.85818	1	14292	1	0.026509	0.084228	0.908534	1598	5
ID4	5	0.22948	0.40625	1	6512	2	0.02654	0.084316	0.908685	1599	3
TAS2R40	5	0.96909	0.96904	1	16515	0	0.026553	0.084347	0.908685	1600	4
MICU2	3	0.49887	0.65177	1	10559	1	0.026649	0.084627	0.911129	1601	1
PSD	6	0.61666	0.73324	1	12024	1	0.026674	0.084701	0.911358	1602	5
PVRL1	6	0.90347	0.9082	1	15265	1	0.026802	0.085042	0.91362	1603	5
ZNF408	6	0.2603	0.44137	1	7043	1	0.026843	0.085138	0.91362	1604	5
HOXB6	6	0.41315	0.59392	1	9591	2	0.026863	0.085192	0.91362	1605	2
ZNF511	6	0.13667	0.29403	1	4822	1	0.026864	0.085195	0.91362	1606	4
PPARA	6	0.99654	0.99648	1	17150	0	0.026876	0.08523	0.91362	1607	5
WDR19	6	0.36827	0.55309	1	8860	2	0.026889	0.085277	0.91362	1608	3
FIGLA	5	0.85579	0.87565	1	14654	1	0.026891	0.085283	0.91362	1609	2
GFRAL	6	0.63489	0.74565	1	12229	2	0.026993	0.085559	0.914411	1610	4
SLC4A3	6	0.22102	0.39658	1	6370	3	0.02701	0.085602	0.914411	1611	3
NECAB1	6	0.010734	0.038141	0.662255	991	2	0.027027	0.08565	0.914411	1612	4
ADAM8	6	0.98072	0.98068	1	16754	0	0.027034	0.085665	0.914411	1613	3
DHRS7	6	0.77246	0.83126	1	13799	1	0.027035	0.085668	0.914411	1614	5
PHLDB3	6	0.82779	0.85944	1	14316	1	0.027053	0.085709	0.914411	1615	4
ERN1	6	0.90138	0.9066	1	15234	1	0.027059	0.085728	0.914411	1616	3
LRCH1	6	0.41274	0.59364	1	9584	1	0.02708	0.085784	0.914446	1617	5
UTRN	6	0.59502	0.71765	1	11751	1	0.027144	0.085974	0.915906	1618	5
ADAP2	6	0.078664	0.19216	1	3292	2	0.027165	0.086037	0.915985	1619	3
PHOX2A	6	0.02181	0.070958	0.818073	1495	2	0.027192	0.086108	0.915985	1620	3
BMP7	6	0.88934	0.89765	1	15069	1	0.027216	0.086181	0.915985	1621	4
SGPP2	6	0.8114	0.85057	1	14152	1	0.02722	0.086194	0.915985	1622	5
ZSWIM5	6	0.67533	0.774	1	12740	1	0.027271	0.086334	0.916903	1623	4
TIE1	6	0.98462	0.98453	1	16852	0	0.027317	0.086461	0.917184	1624	4
TBC1D9B	6	0.27972	0.46259	1	7397	3	0.027343	0.086535	0.917184	1625	2
NDST4	6	0.73638	0.81497	1	13507	1	0.027376	0.086614	0.917184	1626	4
TMPRSS11B	3	0.37499	0.55981	1	8973	1	0.027391	0.086643	0.917184	1627	2
OLR1	6	0.99224	0.99212	1	17040	0	0.027392	0.086646	0.917184	1628	5
CASP10	6	0.41728	0.5966	1	9640	2	0.02744	0.086774	0.917184	1629	2
HRASLS2	5	0.97485	0.97483	1	16623	0	0.027452	0.08681	0.917184	1630	4
RPS6KC1	6	0.78098	0.83532	1	13879	1	0.02747	0.086858	0.917184	1631	4
CACNA1I	6	0.97888	0.97886	1	16711	0	0.027483	0.086893	0.917184	1632	4
OR11L1	5	0.98579	0.98571	1	16886	0	0.02749	0.086912	0.917184	1633	4
PRKAR2B	6	0.94841	0.94837	1	16060	0	0.027505	0.086945	0.917184	1634	2
ERCC6L2	6	0.78308	0.83632	1	13896	1	0.027533	0.087025	0.917432	1635	4
MAN1A2	6	0.8843	0.89412	1	14995	1	0.027564	0.08711	0.917432	1636	5
LONP2	6	0.15992	0.32568	1	5298	1	0.027572	0.087133	0.917432	1637	5
HEG1	6	0.88804	0.89672	1	15047	1	0.027624	0.087277	0.917432	1638	5
SEMA4B	6	0.86014	0.87842	1	14699	1	0.02763	0.087294	0.917432	1639	4
PPP1R3F	6	0.96714	0.96711	1	16472	0	0.02764	0.087326	0.917432	1640	3
LEO1	6	0.8394	0.86596	1	14461	1	0.027666	0.087404	0.917432	1641	5
LYPD1	6	0.67505	0.77379	1	12736	1	0.027666	0.087404	0.917432	1642	4
OR51J1	3	0.15609	0.3212	1	5228	1	0.027681	0.087448	0.917432	1643	1
ALDH7A1	6	0.44253	0.61366	1	9912	2	0.027737	0.087607	0.917617	1644	3
TMEM215	6	0.5495	0.68587	1	11218	2	0.027761	0.08768	0.917617	1645	3
OR9G4	4	0.80136	0.84551	1	14051	1	0.027799	0.087763	0.917617	1646	3
TFIP11	6	0.2168	0.39176	1	6294	3	0.027826	0.087836	0.917617	1647	2
MIER1	6	0.99563	0.99556	1	17128	0	0.027834	0.087863	0.917617	1648	5
WRNIP1	6	0.45819	0.62428	1	10092	2	0.027857	0.087922	0.917617	1649	3
ROCK2	6	0.92631	0.92717	1	15654	1	0.027862	0.087934	0.917617	1650	4
CHSY3	6	0.69371	0.78731	1	12988	2	0.02787	0.087958	0.917617	1651	3
TIMM44	6	4.132e-05	0.00020592	0.05069	70	5	0.02789	0.088016	0.917617	1652	1
CDC42EP4	6	0.52392	0.66845	1	10855	1	0.02794	0.088151	0.917617	1653	4
FAM26D	4	0.097469	0.22643	1	3817	1	0.027976	0.08826	0.917617	1654	1
SDHD	2	0.60605	0.72558	1	11881	1	0.027999	0.088331	0.917617	1655	1
MAGEF1	4	0.83819	0.86526	1	14446	1	0.027999	0.088332	0.917617	1656	2
PLK4	6	0.089619	0.21227	1	3610	3	0.028018	0.088383	0.917617	1657	3
SLC52A2	6	0.906	0.9102	1	15309	1	0.028023	0.088399	0.917617	1658	4
JAKMIP2	6	0.92001	0.92172	1	15537	1	0.028053	0.088486	0.917617	1659	4
SLC22A12	6	0.52607	0.66988	1	10887	2	0.028082	0.088572	0.917617	1660	3
VDAC2	1	0.97192	0.97185	1	16560	0	0.028083	0.088572	0.917617	1661	1
ISOC2	6	0.15733	0.32264	1	5250	1	0.028134	0.088705	0.917617	1662	3
ACTR1B	6	0.044208	0.12425	0.938492	2282	3	0.028146	0.088742	0.917617	1663	2
FAM194A	6	0.9658	0.96577	1	16451	0	0.028163	0.088788	0.917617	1664	5
GSK3A	6	0.62422	0.7384	1	12109	1	0.02817	0.08881	0.917617	1665	4
SPTBN5	6	0.12209	0.26939	1	4454	1	0.028196	0.088895	0.917617	1666	4
CASQ2	6	0.39324	0.57805	1	9303	3	0.028235	0.08901	0.917617	1667	2
SLC5A7	6	0.91554	0.91788	1	15461	1	0.028235	0.089011	0.917617	1668	5
FLVCR1	6	0.31309	0.49772	1	7985	2	0.028247	0.089049	0.917617	1669	4
RAB3B	5	0.85041	0.87246	1	14599	1	0.028254	0.089068	0.917617	1670	4
FAM50A	6	0.0094566	0.03416	0.633136	930	3	0.028275	0.089124	0.917617	1671	3
RB1CC1	6	0.98077	0.98073	1	16757	0	0.028308	0.089218	0.917617	1672	5
USP30	6	0.75089	0.82132	1	13622	1	0.028329	0.08928	0.917617	1673	5
GPNMB	6	0.33841	0.52351	1	8407	3	0.028339	0.089309	0.917617	1674	2
PI15	4	0.53259	0.6743	1	10985	1	0.028374	0.089395	0.917617	1675	3
SFT2D1	5	0.34268	0.52774	1	8480	2	0.028434	0.089549	0.917617	1676	3
TRIM10	6	0.62171	0.73668	1	12076	2	0.028437	0.089557	0.917617	1677	3
ATXN3	5	0.55561	0.6901	1	11286	1	0.028443	0.08957	0.917617	1678	3
RFWD3	6	0.45642	0.62308	1	10073	2	0.028467	0.089643	0.917617	1679	3
MAATS1	6	0.99094	0.99082	1	17012	0	0.028469	0.089647	0.917617	1680	5
ELFN2	5	0.80859	0.84911	1	14125	1	0.028469	0.089647	0.917617	1681	4
LIMS2	6	0.33148	0.51645	1	8302	2	0.028477	0.089666	0.917617	1682	3
SHCBP1L	6	0.69892	0.79111	1	13060	2	0.02848	0.089672	0.917617	1683	3
GABPB2	6	0.42424	0.6012	1	9711	2	0.028485	0.089684	0.917617	1684	4
CNOT2	6	0.18158	0.35107	1	5651	1	0.028509	0.089757	0.917617	1685	4
GAS2L2	6	0.0011417	0.0051016	0.270571	325	4	0.028531	0.089812	0.917617	1686	1
SLC22A24	6	0.13194	0.28611	1	4695	3	0.028532	0.089816	0.917617	1687	3
NENF	5	0.27908	0.46191	1	7385	2	0.0286	0.090001	0.917617	1688	2
POLN	6	0.63759	0.74751	1	12263	1	0.028601	0.090003	0.917617	1689	4
NCK1	5	0.046396	0.12885	0.944091	2352	4	0.028604	0.090012	0.917617	1690	1
GALNTL5	3	0.76892	0.82958	1	13757	0	0.028616	0.090035	0.917617	1691	1
SLC18A3	5	0.16808	0.33522	1	5427	2	0.028684	0.090209	0.917617	1692	3
DESI2	5	0.94543	0.9454	1	15991	0	0.028713	0.090289	0.917617	1693	4
BIRC7	6	0.14357	0.30542	1	4986	3	0.02872	0.090311	0.917617	1694	3
CHST7	6	0.9961	0.99604	1	17144	0	0.028732	0.090348	0.917617	1695	5
TMEM179	6	0.52392	0.66845	1	10854	2	0.028736	0.090363	0.917617	1696	3
TRPC1	6	0.9076	0.91146	1	15339	1	0.028737	0.090368	0.917617	1697	5
CADM1	6	0.14192	0.3027	1	4960	2	0.02875	0.090394	0.917617	1698	4
NPNT	6	0.4359	0.60908	1	9829	1	0.028788	0.090482	0.917974	1699	3
EIF2AK1	6	0.29666	0.4804	1	7686	2	0.028821	0.090581	0.918442	1700	4
ROBO1	6	0.10318	0.23654	1	3965	2	0.028907	0.090818	0.920091	1701	3
CLEC11A	6	0.85013	0.8723	1	14597	1	0.02892	0.090851	0.920091	1702	4
CREB5	6	0.53849	0.67833	1	11069	2	0.028972	0.090996	0.920298	1703	4
WNT11	6	0.99191	0.99178	1	17035	0	0.029006	0.091077	0.920298	1704	4
DSC2	6	0.92042	0.92209	1	15548	1	0.029021	0.091114	0.920298	1705	4
SH3RF3	6	0.26045	0.44155	1	7046	1	0.029094	0.091296	0.920298	1706	5
RASA2	6	0.040273	0.11591	0.92135	2166	1	0.029094	0.091297	0.920298	1707	3
CDKN3	4	0.79252	0.84109	1	13980	1	0.029097	0.091308	0.920298	1708	2
CAMSAP3	6	0.049757	0.13584	0.955949	2447	3	0.029108	0.091333	0.920298	1709	2
WDR38	6	0.5938	0.71678	1	11736	1	0.029172	0.091511	0.920298	1710	4
EEA1	6	0.98662	0.98655	1	16904	0	0.029182	0.091535	0.920298	1711	5
TBC1D8	6	0.89006	0.89816	1	15079	1	0.029219	0.091654	0.920298	1712	5
PRTG	6	0.21387	0.3884	1	6237	2	0.029225	0.091671	0.920298	1713	4
USF1	6	0.28598	0.46918	1	7504	2	0.029237	0.091705	0.920298	1714	2
C3orf30	5	0.97609	0.97606	1	16652	0	0.029271	0.091804	0.920298	1715	4
TCF25	6	0.17103	0.33871	1	5478	2	0.029278	0.091824	0.920298	1716	4
HERC3	6	0.74487	0.81866	1	13576	1	0.029282	0.09183	0.920298	1717	5
SLC22A10	6	0.47118	0.63317	1	10253	2	0.029301	0.091876	0.920298	1718	4
GOLPH3L	6	0.92447	0.92554	1	15625	1	0.029321	0.091916	0.920298	1719	5
SPATA24	6	0.15434	0.31914	1	5192	2	0.029326	0.091927	0.920298	1720	3
HDGF	6	0.97308	0.97302	1	16580	0	0.029347	0.091978	0.920298	1721	5
DGKB	6	0.81527	0.85255	1	14190	1	0.029416	0.092157	0.920298	1722	4
TCN1	3	0.088946	0.2111	1	3601	1	0.029421	0.092171	0.920298	1723	1
FANCG	6	0.10385	0.23771	1	3980	3	0.029429	0.092188	0.920298	1724	1
SPINK14	3	0.97056	0.97048	1	16541	0	0.029437	0.092209	0.920298	1725	3
FAM184A	6	0.24449	0.42344	1	6751	2	0.029457	0.092258	0.920298	1726	3
BTNL3	5	0.86771	0.88319	1	14785	1	0.029477	0.092311	0.920298	1727	4
ADCK2	6	0.27039	0.45254	1	7225	3	0.029493	0.092344	0.920298	1728	3
RINL	6	0.39819	0.58298	1	9388	1	0.029544	0.09248	0.920298	1729	4
POLM	6	0.0041054	0.016659	0.479372	599	4	0.029557	0.092521	0.920298	1730	2
KLK8	6	0.72038	0.80719	1	13356	1	0.029561	0.09253	0.920298	1731	4
TICAM2	6	0.98692	0.98686	1	16917	0	0.029562	0.092531	0.920298	1732	5
ADORA2A	6	0.5459	0.68341	1	11169	1	0.029578	0.092573	0.920298	1733	4
ARHGAP39	6	0.5427	0.68121	1	11123	2	0.029582	0.09258	0.920298	1734	4
WDR54	6	0.13713	0.29476	1	4835	1	0.029621	0.09268	0.920654	1735	2
GORAB	6	0.54658	0.68389	1	11180	1	0.029669	0.092817	0.920654	1736	5
COPZ2	5	0.97331	0.97325	1	16588	0	0.029683	0.092865	0.920654	1737	4
WDR96	6	0.95795	0.95791	1	16276	0	0.029693	0.0929	0.920654	1738	4
KRTAP29-1	4	0.9272	0.92796	1	15666	0	0.02972	0.092958	0.920654	1739	3
CFDP1	6	0.0049003	0.019332	0.504973	659	3	0.029749	0.093021	0.920654	1740	2
OSBPL10	6	0.58458	0.71027	1	11623	2	0.02979	0.09314	0.920654	1741	4
TXNDC2	5	0.8644	0.8811	1	14747	1	0.029794	0.093147	0.920654	1742	4
TLR7	5	0.81006	0.84986	1	14139	1	0.029801	0.093167	0.920654	1743	4
SQLE	6	0.62436	0.73851	1	12110	1	0.029804	0.093174	0.920654	1744	5
FNDC4	6	0.67749	0.77552	1	12765	2	0.029829	0.093236	0.920654	1745	2
CRP	2	0.48842	0.64481	1	10460	1	0.029898	0.093409	0.920654	1746	1
ME1	6	0.72724	0.81112	1	13436	1	0.029941	0.093528	0.920654	1747	4
VWCE	6	0.31515	0.49991	1	8018	3	0.029958	0.093574	0.920654	1748	3
PTK2B	6	0.69471	0.78804	1	13006	1	0.029968	0.093602	0.920654	1749	5
ALDOB	6	0.77056	0.83036	1	13773	1	0.029979	0.09364	0.920654	1750	3
DESI1	6	0.40103	0.58583	1	9435	3	0.029996	0.093679	0.920654	1751	3
PNLIPRP2	6	0.81573	0.8528	1	14196	1	0.029998	0.09368	0.920654	1752	5
SBNO2	6	0.88518	0.89472	1	15011	1	0.030012	0.093726	0.920654	1753	5
TMCO6	6	0.99336	0.99323	1	17071	0	0.030018	0.093742	0.920654	1754	5
LPO	6	0.65183	0.75737	1	12454	2	0.030022	0.09375	0.920654	1755	4
CLASP1	6	0.9851	0.985	1	16865	0	0.030062	0.093847	0.920654	1756	5
HNF4G	6	0.95297	0.95292	1	16161	0	0.030092	0.093931	0.920654	1757	4
KLHL22	6	0.97947	0.97946	1	16724	0	0.0301	0.09395	0.920654	1758	5
ALS2	6	0.93432	0.93448	1	15785	1	0.030112	0.093982	0.920654	1759	4
HSD11B1L	6	0.58836	0.71293	1	11668	2	0.030134	0.094032	0.920654	1760	2
SHE	6	0.83586	0.86392	1	14418	1	0.030144	0.094058	0.920654	1761	5
FAM167A	6	0.20829	0.38206	1	6136	3	0.030198	0.094191	0.921435	1762	2
TECTB	6	0.99057	0.99045	1	16998	0	0.030238	0.094306	0.921639	1763	5
HS3ST5	6	0.93478	0.93492	1	15792	1	0.030265	0.094386	0.921639	1764	5
PRODH	6	0.83065	0.86099	1	14348	1	0.030287	0.094441	0.921639	1765	5
KLHL31	6	0.63409	0.7451	1	12219	1	0.030315	0.094507	0.921639	1766	5
MGMT	6	0.70989	0.79922	1	13216	2	0.030345	0.094578	0.921639	1767	3
UBR2	6	0.84251	0.86774	1	14500	1	0.030362	0.094617	0.921639	1768	3
GBP7	6	0.64378	0.75174	1	12353	1	0.030369	0.094638	0.921639	1769	5
RAD54L2	6	0.2917	0.47523	1	7600	2	0.030384	0.094677	0.921639	1770	3
DBNDD1	6	0.015775	0.053516	0.745716	1237	2	0.03039	0.094693	0.921639	1771	3
TNS1	6	0.52205	0.66717	1	10835	1	0.030457	0.094857	0.92206	1772	4
ITGAM	6	0.76998	0.83008	1	13767	1	0.030487	0.094938	0.92206	1773	5
OR14A16	2	0.96951	0.96945	1	16521	0	0.030489	0.094942	0.92206	1774	2
PHC2	6	0.95948	0.95946	1	16313	0	0.030505	0.094989	0.92206	1775	5
HSPA4	6	0.39238	0.57721	1	9282	1	0.030511	0.095004	0.92206	1776	5
PCK1	6	0.24991	0.42956	1	6849	2	0.030577	0.095168	0.922811	1777	3
SLC35C1	6	0.56779	0.69858	1	11418	1	0.030582	0.095188	0.922811	1778	4
SNAP23	6	0.99586	0.99579	1	17135	0	0.030608	0.095244	0.922832	1779	4
TMEM151B	6	0.99258	0.99245	1	17052	0	0.030661	0.095383	0.923659	1780	5
TCAIM	6	0.97583	0.9758	1	16648	0	0.030719	0.095543	0.924686	1781	4
CEP76	6	0.84354	0.86836	1	14514	1	0.030767	0.095672	0.925236	1782	5
NAB1	3	0.96921	0.96916	1	16516	0	0.030794	0.095756	0.925236	1783	3
LONRF2	6	0.80467	0.84712	1	14077	1	0.030813	0.095804	0.925236	1784	3
LEPREL4	6	0.15682	0.32207	1	5240	3	0.030871	0.095964	0.925236	1785	3
SLC5A3	4	0.7688	0.82952	1	13755	1	0.030872	0.095966	0.925236	1786	3
UNC5A	6	0.34325	0.52833	1	8486	2	0.030902	0.096035	0.925236	1787	3
DIRAS2	5	0.20674	0.38028	1	6105	2	0.030945	0.096153	0.925236	1788	3
GMPS	5	0.043723	0.12323	0.935818	2269	3	0.030955	0.096185	0.925236	1789	1
TAF9	1	0.96904	0.96899	1	16513	0	0.030963	0.096206	0.925236	1790	1
HIAT1	6	0.42449	0.60135	1	9714	2	0.030966	0.096215	0.925236	1791	3
IL21	2	0.95402	0.95396	1	16188	0	0.031041	0.096424	0.925236	1792	2
UPP1	6	0.33427	0.5193	1	8350	3	0.031048	0.096441	0.925236	1793	3
RSPH4A	6	0.65357	0.75861	1	12472	1	0.031049	0.096445	0.925236	1794	5
GPR153	6	0.93491	0.93506	1	15795	1	0.031053	0.096459	0.925236	1795	5
TMCO3	6	0.60889	0.7276	1	11923	1	0.031054	0.096464	0.925236	1796	5
CCR5	2	0.7848	0.83715	1	13914	0	0.031084	0.096541	0.925236	1797	1
SFRP4	6	0.61595	0.73273	1	12014	1	0.031089	0.096556	0.925236	1798	4
PRRC2B	6	0.02764	0.087087	0.858491	1748	5	0.031094	0.096566	0.925236	1799	1
REM2	6	0.59662	0.71877	1	11765	2	0.031139	0.096705	0.926059	1800	3
TANC1	6	0.9324	0.93272	1	15761	1	0.031261	0.097014	0.928497	1801	4
TNFRSF13C	5	0.99114	0.99102	1	17018	0	0.031344	0.09724	0.928696	1802	4
SEC24D	6	0.47426	0.63526	1	10290	2	0.03135	0.097253	0.928696	1803	4
SPP1	5	0.95269	0.95264	1	16157	0	0.031368	0.097294	0.928696	1804	4
AACS	6	0.16749	0.33455	1	5418	3	0.031428	0.097462	0.928696	1805	2
CAMK1D	6	0.95029	0.95022	1	16103	0	0.031429	0.097464	0.928696	1806	5
ZNF300	3	0.96856	0.96849	1	16505	0	0.031444	0.097506	0.928696	1807	3
SETD1B	6	0.73075	0.81254	1	13462	1	0.031446	0.097509	0.928696	1808	4
CHM	6	0.3911	0.5759	1	9260	1	0.031454	0.097522	0.928696	1809	3
B3GALT1	4	0.86599	0.88211	1	14763	0	0.031454	0.097522	0.928696	1810	3
DNAJB13	6	0.78225	0.83593	1	13889	1	0.031483	0.097607	0.928696	1811	5
MSANTD1	6	0.92009	0.92179	1	15539	1	0.031507	0.097666	0.928696	1812	4
FAM110D	4	0.8885	0.89707	1	15055	0	0.031573	0.097849	0.928696	1813	1
GABRA1	6	0.26604	0.4477	1	7140	2	0.031606	0.097945	0.928696	1814	3
KEL	6	0.70598	0.79629	1	13161	1	0.031712	0.098224	0.928696	1815	5
OOEP	4	0.7569	0.82399	1	13671	1	0.031725	0.098256	0.928696	1816	2
SAMD1	6	0.26313	0.44447	1	7089	1	0.031728	0.098264	0.928696	1817	4
KCNH1	6	0.55657	0.69077	1	11292	1	0.031732	0.098277	0.928696	1818	5
SNF8	6	0.10369	0.23741	1	3973	2	0.031734	0.098282	0.928696	1819	2
SLC28A2	6	0.57288	0.70211	1	11495	1	0.031745	0.098312	0.928696	1820	5
CEP68	6	0.82195	0.85619	1	14255	1	0.031828	0.098539	0.928696	1821	5
OLFML2B	6	0.11066	0.24963	1	4145	4	0.031862	0.098631	0.928696	1822	1
MTMR14	6	0.78926	0.83947	1	13956	1	0.031862	0.098635	0.928696	1823	4
CBLN3	6	0.18175	0.35128	1	5656	2	0.031863	0.098636	0.928696	1824	3
FKBP6	6	0.25081	0.43058	1	6864	3	0.031926	0.09879	0.928696	1825	2
KCTD6	5	0.97507	0.97504	1	16631	0	0.031933	0.098812	0.928696	1826	4
TTC26	6	0.17601	0.34456	1	5561	2	0.031953	0.098878	0.928696	1827	4
RXRG	6	0.44923	0.6182	1	9987	2	0.03199	0.098988	0.928696	1828	4
PLA2G4E	6	0.52566	0.66961	1	10880	1	0.032	0.099014	0.928696	1829	4
LNX1	6	0.22655	0.40285	1	6467	2	0.032053	0.099166	0.928696	1830	3
PRKAB1	6	0.26582	0.44747	1	7134	3	0.032101	0.0993	0.928696	1831	2
HIST3H2A	4	0.66052	0.76337	1	12554	1	0.032128	0.099383	0.928696	1832	3
GJB1	4	0.54198	0.68074	1	11111	1	0.03213	0.099385	0.928696	1833	3
PTGER2	6	0.92283	0.9241	1	15595	1	0.032168	0.099477	0.928696	1834	4
WDR78	6	0.6681	0.76884	1	12647	1	0.032169	0.099477	0.928696	1835	5
NT5C1B	6	0.64951	0.75575	1	12421	1	0.032181	0.099517	0.928696	1836	3
CRH	4	0.88166	0.89234	1	14963	0	0.032199	0.099556	0.928696	1837	3
GALNT12	6	0.051547	0.13958	0.958695	2506	4	0.032245	0.099678	0.928696	1838	1
LIX1	6	0.66605	0.76741	1	12621	1	0.032261	0.099726	0.928696	1839	5
RAVER2	6	0.65991	0.76294	1	12542	1	0.032274	0.099757	0.928696	1840	3
ATP10A	6	0.45588	0.62271	1	10067	1	0.032291	0.099799	0.928696	1841	5
NUMBL	6	0.085942	0.20557	1	3514	1	0.032309	0.099854	0.928696	1842	3
ZNF17	5	0.01649	0.055619	0.756071	1268	3	0.032316	0.099871	0.928696	1843	1
ZBTB41	6	0.90498	0.9094	1	15286	1	0.032317	0.099874	0.928696	1844	3
C14orf180	6	0.91728	0.91935	1	15484	1	0.03234	0.099941	0.928696	1845	4
RAB8B	6	0.51428	0.66196	1	10742	1	0.032372	0.10002	0.928696	1846	4
SHCBP1	6	0.37913	0.56392	1	9055	3	0.032373	0.10002	0.928696	1847	2
TEAD2	6	0.87683	0.88912	1	14907	1	0.032376	0.10003	0.928696	1848	5
DCAF12L2	4	0.80574	0.84765	1	14088	1	0.032385	0.10005	0.928696	1849	1
DNMT3A	6	0.77743	0.83359	1	13847	1	0.032426	0.10018	0.928696	1850	4
TMEM161B	2	0.96755	0.9675	1	16486	0	0.032449	0.10025	0.928696	1851	2
RNF220	6	0.83792	0.86511	1	14443	1	0.032554	0.10054	0.928696	1852	5
C22orf31	6	0.97722	0.97716	1	16682	0	0.032562	0.10057	0.928696	1853	3
APOOL	2	0.94567	0.94564	1	16000	0	0.032571	0.10059	0.928696	1854	2
CYP4X1	6	0.95308	0.95304	1	16166	0	0.032622	0.10071	0.928696	1855	5
BEND5	6	0.37085	0.55567	1	8912	2	0.03265	0.10079	0.928696	1856	4
ACOT4	2	0.96732	0.96729	1	16479	0	0.03268	0.10087	0.928696	1857	2
CAPZA3	4	0.95156	0.95149	1	16134	0	0.032693	0.1009	0.928696	1858	3
ACE2	6	0.16273	0.329	1	5340	2	0.032693	0.1009	0.928696	1859	3
GPLD1	6	0.96103	0.96096	1	16338	0	0.03275	0.10108	0.928696	1860	4
SLC1A7	6	0.16084	0.32678	1	5312	3	0.032757	0.1011	0.928696	1861	3
OR52E6	1	0.96723	0.9672	1	16475	0	0.032769	0.10112	0.928696	1862	1
SMO	6	0.58248	0.70882	1	11600	2	0.032781	0.10115	0.928696	1863	4
CERK	6	0.18667	0.35689	1	5746	3	0.032794	0.10119	0.928696	1864	3
DDX60	6	0.47842	0.63816	1	10348	2	0.032808	0.10123	0.928696	1865	4
NEIL2	5	0.83759	0.86492	1	14439	1	0.032823	0.10127	0.928696	1866	3
RBM10	6	0.97566	0.97564	1	16642	0	0.032844	0.10133	0.928696	1867	5
TBC1D15	6	0.85077	0.87266	1	14605	1	0.032866	0.10137	0.928696	1868	4
TMEM196	6	0.99526	0.99519	1	17116	0	0.03287	0.10138	0.928696	1869	5
KRTAP4-3	2	0.94426	0.94421	1	15961	0	0.032872	0.10139	0.928696	1870	2
TDRD10	6	0.18861	0.35915	1	5782	3	0.032884	0.10142	0.928696	1871	3
TBC1D4	6	0.98714	0.98709	1	16923	0	0.032901	0.10146	0.928696	1872	2
CCER1	6	0.59031	0.71432	1	11694	1	0.032912	0.10149	0.928696	1873	4
AKAP5	2	0.96708	0.96705	1	16470	0	0.032924	0.10152	0.928696	1874	2
ZNHIT6	5	0.0033556	0.014048	0.447141	540	4	0.032929	0.10153	0.928696	1875	1
COX17	2	0.54571	0.68329	1	11166	1	0.032937	0.10156	0.928696	1876	1
BCR	6	0.91919	0.921	1	15521	1	0.032956	0.10161	0.928696	1877	4
SLC35F1	6	0.97727	0.97721	1	16685	0	0.032971	0.10165	0.928696	1878	4
NARF	6	0.13562	0.29231	1	4796	1	0.032981	0.10168	0.928696	1879	5
DBF4B	6	0.89156	0.89929	1	15100	1	0.032981	0.10168	0.928696	1880	3
HOXD11	6	0.03701	0.10884	0.908965	2064	3	0.033012	0.10176	0.928696	1881	1
DUSP6	6	0.3518	0.53687	1	8618	1	0.033035	0.10181	0.928696	1882	5
PPP1R10	6	0.14961	0.31344	1	5101	3	0.033076	0.10193	0.928696	1883	2
DKKL1	6	0.92979	0.93028	1	15719	1	0.033096	0.10198	0.928696	1884	3
CIRBP	6	0.22512	0.40118	1	6438	2	0.03314	0.10209	0.928696	1885	4
ZNF672	6	0.47575	0.63628	1	10312	1	0.033173	0.10218	0.928696	1886	4
EPHA1	6	0.44423	0.61481	1	9934	2	0.033204	0.10226	0.928696	1887	2
TINAG	4	0.87703	0.88925	1	14910	0	0.033237	0.10236	0.928696	1888	3
PPP1R9A	6	0.11089	0.25	1	4152	2	0.033237	0.10236	0.928696	1889	3
SH3BGRL3	2	0.21127	0.38549	1	6186	1	0.033239	0.10236	0.928696	1890	1
RAB33B	5	0.95531	0.95531	1	16218	0	0.033253	0.1024	0.928696	1891	4
LRRC37B	2	0.96674	0.96673	1	16464	0	0.033265	0.10244	0.928696	1892	2
ERAS	5	0.97711	0.97706	1	16678	0	0.033277	0.10247	0.928696	1893	4
SLC10A6	6	0.45786	0.62406	1	10087	1	0.033316	0.10257	0.928696	1894	4
PLXNB2	6	0.93992	0.9399	1	15912	0	0.033322	0.10259	0.928696	1895	4
TRIM21	6	0.32825	0.5132	1	8251	2	0.033332	0.10261	0.928696	1896	4
MARK2	6	0.33292	0.51793	1	8329	1	0.033333	0.10262	0.928696	1897	5
TRAPPC9	6	0.1299	0.28265	1	4648	2	0.033359	0.10268	0.928696	1898	4
WDR41	6	0.98874	0.98862	1	16963	0	0.033383	0.10275	0.928696	1899	5
TNFRSF4	6	0.53854	0.67836	1	11070	1	0.033459	0.10295	0.928696	1900	1
CALML4	6	0.45402	0.62145	1	10046	2	0.033466	0.10297	0.928696	1901	2
ZNF436	5	0.47613	0.63656	1	10318	1	0.033472	0.10299	0.928696	1902	4
DTNA	6	0.97816	0.97811	1	16697	0	0.033491	0.10302	0.928696	1903	5
TP53INP1	6	0.5063	0.65662	1	10642	1	0.033505	0.10306	0.928696	1904	4
MYBL1	5	0.15537	0.32035	1	5212	1	0.033515	0.10309	0.928696	1905	3
RBM15B	6	0.21927	0.39462	1	6327	3	0.03352	0.10311	0.928696	1906	3
YME1L1	6	0.81605	0.85299	1	14200	1	0.033522	0.10311	0.928696	1907	5
FKBP11	6	0.37251	0.55736	1	8937	1	0.033522	0.10311	0.928696	1908	4
HYDIN	6	0.013448	0.04642	0.716628	1116	5	0.033523	0.10312	0.928696	1909	1
UBAC1	6	0.40084	0.58563	1	9430	1	0.033526	0.10312	0.928696	1910	5
TMEM120B	6	0.71846	0.80569	1	13330	1	0.03354	0.10316	0.928696	1911	4
SHPRH	6	0.038112	0.11127	0.913	2097	1	0.033546	0.10318	0.928696	1912	4
RIMS2	6	0.32868	0.51362	1	8258	3	0.03355	0.10319	0.928696	1913	3
SNAI2	6	0.82057	0.85543	1	14239	1	0.03356	0.10322	0.928696	1914	4
HMCN2	6	0.69552	0.78865	1	13019	1	0.033591	0.10332	0.928696	1915	5
SOBP	6	0.93332	0.93354	1	15776	1	0.03361	0.10335	0.928696	1916	4
DDR2	6	0.85843	0.87733	1	14687	1	0.033615	0.10337	0.928696	1917	3
CEBPE	6	0.29016	0.47365	1	7572	3	0.033642	0.10343	0.928696	1918	3
EGR2	6	0.039161	0.11353	0.917647	2129	1	0.033651	0.10347	0.928696	1919	2
ITGA10	6	0.90769	0.91153	1	15341	1	0.033661	0.1035	0.928696	1920	5
TEPP	6	0.95532	0.95532	1	16219	0	0.033662	0.1035	0.928696	1921	4
SLC10A2	6	0.87368	0.88708	1	14860	1	0.033729	0.10369	0.929328	1922	5
CLMP	6	0.84936	0.87185	1	14587	1	0.033772	0.1038	0.929328	1923	5
XAF1	6	0.36948	0.55429	1	8886	2	0.033779	0.10381	0.929328	1924	4
MCOLN1	6	0.68293	0.77943	1	12832	2	0.033789	0.10384	0.929328	1925	3
NKX2-6	6	0.38806	0.5729	1	9208	3	0.033791	0.10384	0.929328	1926	2
FBXO18	6	0.60367	0.72387	1	11847	1	0.033849	0.104	0.929592	1927	5
MOAP1	5	0.41275	0.59365	1	9585	1	0.033862	0.10404	0.929592	1928	3
TBC1D1	6	0.37536	0.56018	1	8982	3	0.033906	0.10416	0.929592	1929	2
RAB37	6	0.1567	0.32191	1	5236	2	0.033913	0.10418	0.929592	1930	3
TBC1D17	6	0.083273	0.20063	1	3436	4	0.03394	0.10425	0.929592	1931	2
COL13A1	6	0.82507	0.85791	1	14288	1	0.033943	0.10426	0.929592	1932	4
TIMM23	3	0.053329	0.1432	0.964382	2559	2	0.033955	0.10428	0.929592	1933	1
CCM2	6	0.90484	0.90929	1	15284	1	0.03398	0.10436	0.929592	1934	4
POU1F1	3	0.95346	0.95343	1	16176	0	0.033995	0.1044	0.929592	1935	3
XKR6	6	0.82126	0.85581	1	14248	1	0.034002	0.10443	0.929592	1936	5
MLH3	6	0.93035	0.93081	1	15726	1	0.034016	0.10446	0.929592	1937	5
WNT7B	6	0.67773	0.7757	1	12769	2	0.034041	0.10453	0.92971	1938	3
KIR3DL1	3	0.20786	0.38156	1	6128	1	0.034059	0.10458	0.929715	1939	2
GRIK1	6	0.46334	0.62776	1	10165	1	0.034162	0.10484	0.931154	1940	1
C1orf95	6	0.45632	0.62302	1	10071	2	0.034188	0.10491	0.931154	1941	3
LAPTM5	6	0.9221	0.92349	1	15578	1	0.03419	0.10491	0.931154	1942	5
PDZD3	6	0.033619	0.10156	0.888138	1971	1	0.034241	0.10505	0.931901	1943	5
PHF19	6	0.56855	0.69914	1	11430	2	0.034268	0.10512	0.931901	1944	4
GNAO1	6	0.37908	0.56387	1	9053	1	0.034284	0.10517	0.931901	1945	4
CKLF	5	0.64741	0.75427	1	12404	1	0.0343	0.10521	0.931901	1946	4
TSGA13	4	0.92038	0.92205	1	15546	0	0.034349	0.10534	0.93219	1947	3
ZNF516	6	0.18845	0.35899	1	5775	1	0.034353	0.10535	0.93219	1948	1
SNRPC	1	0.96559	0.96556	1	16445	0	0.034412	0.10551	0.933079	1949	1
CLIP4	6	0.98403	0.98397	1	16840	0	0.034466	0.10564	0.933079	1950	5
GABRR2	6	0.52584	0.66972	1	10882	2	0.034481	0.10568	0.933079	1951	3
SLC43A2	6	0.32047	0.50531	1	8110	1	0.034497	0.10573	0.933079	1952	5
C1orf65	6	0.99568	0.99561	1	17130	0	0.034506	0.10575	0.933079	1953	5
AMZ1	6	0.91667	0.91886	1	15475	1	0.034551	0.10584	0.933079	1954	4
PCSK1N	6	0.37365	0.55846	1	8954	1	0.034575	0.1059	0.933079	1955	5
CCDC68	5	0.33927	0.52436	1	8419	1	0.034575	0.10591	0.933079	1956	4
ACSM1	6	0.60651	0.72594	1	11891	2	0.034587	0.10594	0.933079	1957	4
MAPKAPK5	6	0.089412	0.2119	1	3609	3	0.034608	0.106	0.933133	1958	3
MMAB	6	0.76353	0.82703	1	13714	1	0.034672	0.10616	0.93409	1959	3
RNF146	6	0.97328	0.97322	1	16586	0	0.034695	0.10621	0.93409	1960	4
MCM4	6	0.2025	0.37533	1	6018	3	0.034741	0.10634	0.93472	1961	3
COL20A1	6	0.83592	0.86396	1	14419	1	0.034855	0.10665	0.935895	1962	4
TMEM89	6	0.079	0.19277	1	3303	4	0.034864	0.10668	0.935895	1963	2
ZDHHC22	6	0.89246	0.89997	1	15109	1	0.034867	0.10668	0.935895	1964	5
RCBTB2	6	0.90252	0.9075	1	15251	1	0.034871	0.10669	0.935895	1965	4
CUTC	6	0.41278	0.59366	1	9586	1	0.034896	0.10676	0.936004	1966	4
NKG7	6	0.6747	0.77353	1	12730	2	0.034991	0.107	0.936968	1967	3
CTCFL	6	0.59854	0.72016	1	11785	2	0.035008	0.10705	0.936968	1968	3
LMBRD2	6	0.61962	0.73523	1	12053	2	0.035024	0.10709	0.936968	1969	3
PARM1	5	0.97957	0.97956	1	16726	0	0.035024	0.10709	0.936968	1970	4
EDA2R	6	0.37007	0.55487	1	8898	2	0.035055	0.10717	0.936968	1971	4
ICOS	2	0.94961	0.94955	1	16083	0	0.035068	0.1072	0.936968	1972	2
GRIN3B	6	0.020809	0.068089	0.810448	1444	2	0.035083	0.10725	0.936968	1973	4
TBC1D19	6	0.96097	0.9609	1	16336	0	0.035119	0.10733	0.937002	1974	4
DAK	6	0.98082	0.98078	1	16758	0	0.035128	0.10736	0.937002	1975	5
KRTAP23-1	2	0.96481	0.96482	1	16426	0	0.035185	0.1075	0.937672	1976	2
PFKM	6	0.73226	0.81322	1	13476	1	0.035199	0.10755	0.937672	1977	4
SIAH1	5	0.94845	0.94842	1	16062	0	0.035255	0.10769	0.937921	1978	3
TRPM3	6	0.99083	0.9907	1	17008	0	0.035272	0.10774	0.937921	1979	5
ANKRD61	5	0.3886	0.57342	1	9214	1	0.035272	0.10774	0.937921	1980	3
HIP1	6	0.28436	0.46749	1	7475	2	0.035324	0.10787	0.938567	1981	4
KRT33B	3	0.96464	0.96463	1	16422	0	0.03536	0.10796	0.938874	1982	3
ARAF	6	0.31579	0.50054	1	8031	3	0.035378	0.10801	0.938874	1983	2
G6PC	6	0.74721	0.81973	1	13593	1	0.035489	0.10828	0.940273	1984	4
SAMD3	6	0.57972	0.70685	1	11564	1	0.035489	0.10829	0.940273	1985	5
TRAK1	6	0.38145	0.56623	1	9088	2	0.03551	0.10834	0.940273	1986	4
MEOX1	4	0.54241	0.681	1	11119	1	0.035587	0.10853	0.940348	1987	3
POU6F1	6	0.27552	0.45811	1	7334	3	0.035629	0.10867	0.940348	1988	3
PTPN5	6	0.65997	0.76299	1	12544	2	0.035683	0.10881	0.940348	1989	3
GUCY2F	6	0.92762	0.92836	1	15676	1	0.035691	0.10883	0.940348	1990	4
FITM2	6	0.96586	0.96584	1	16453	0	0.035694	0.10884	0.940348	1991	5
RUNX1	6	0.96281	0.96278	1	16387	0	0.035721	0.10892	0.940348	1992	5
SMAGP	5	0.35302	0.53807	1	8645	2	0.035735	0.10895	0.940348	1993	3
SCN2B	6	0.43852	0.61085	1	9859	2	0.035756	0.10899	0.940348	1994	2
GJD2	5	0.18145	0.3509	1	5647	1	0.035789	0.10907	0.940348	1995	3
SLAMF6	6	0.11472	0.25665	1	4252	3	0.035794	0.10907	0.940348	1996	3
DALRD3	6	0.82843	0.85977	1	14323	1	0.035855	0.10921	0.940348	1997	4
STAU2	3	0.96413	0.96414	1	16411	0	0.035869	0.10924	0.940348	1998	3
OR9Q2	6	0.14133	0.30171	1	4945	2	0.035877	0.10925	0.940348	1999	2
[truncated: 15,238 more rows]
